# Supplementary material for: Acetaminophen-induced S-nitrosylation and S-sulfenylation signalling in 3D cultured hepatocarcinoma cell spheroids
Source: Toxicol Res (Camb). 2016 Mar 2;5(3):905–20. doi: 10.1039/c5tx00469a (PMC6072433; doi:10.1039/c5tx00469a)
Supplement: Supplementary file 2 [file TX-005-C5TX00469A-s002.xlsx]

## Sheet: Tab key
This supplementary table contains data related to both mapping SNO/SOH proteome of human hepatocytes grown as 3D spheroid culture
Tab name	Short description of the content
A - protein expression	List of all proteins identified/quantified in label-free proteomics experiment. Proteins (quantified with min. 3 peptides/protein) whose abundance changed significantly between control and APAP treatment are marked, the significance threshold was ANOVA p ≤ 0.01 1 protein abundnace change is expressed as an aveage of log2 ratios (APAP/CTRL) from all 3 biological replicates
B- IPA analysis	Ingenuity Pathway Analysis (version 21249400) of differentially regulated proteins under APAP treatement. Included in analysis were all those proteins with relative fold change above 1.2 fold and ANOVA p≤0.05
C - SNOSOH proteome	List of unique, iodoTMT-containing peptides identified in min. 2 biological replicates. "basal SNO/SOH proteome" - the SNO/SOH modified proteins, detected using SNO/SOH strategy in non-treated cells. Included in analysis were those unique, iodoTMT-containing peptides (unique sequence + modification) that were present in min. 2 biological replicates. Modification assignment was based on presence o…
D - RedoxDB+dbSNO	Summary of comparative analysis of all our identified SNO/SOH proteins and sites with information deposited in publicly available repositories of cysteine modifications - RedoxDB and dbSNO.
E - Table 1_extended	This table is an extended version of Table 1 in the manuscript. It contains a list of all differentially regulated SNO/SOH sites includng functional annotations and quantiitive information.

## Sheet: A - protein expression
Protein identifiers				Abundance change				Quantitative data						Features from MS-based quantitation
UniProt accession	Protein name	Gene name	Short name	log2 ratio APAP/CTRL1	Fold change APAP/CTRL	Anova (p)	Significant ANOVA p<0.01 min. 3 peptides used for quantitation	Normalised Intensity CTRL R1	Normalised Intensity CTRL R2	Normalised Intensity CTRL R3	Normalised Intensity APAP R1	Normalised Intensity APAP R2	Normalised Intensity APAP R3	Peptide count	Peptides used for quantitation	Confidence score
Q6P4Q7	Metal transporter CNNM4	CNNM4	CNNM4_HUMAN	5.11276	34.6013	0.0519378		0.00202346	0	0	0.0267259	0.00936146	0.0339269	2	1	99.54
A5PLL7-2	Isoform 2 of Transmembrane protein 189	TMEM189	TM189_HUMAN	3.94183	15.3677	0.158833		0	0.0030007	0.00285672	0.0232593	0.0346954	0.0320606	2	2	119.16
O60828-10	Isoform 10 of Polyglutamine-binding protein 1	PQBP1	PQBP1_HUMAN	3.91943	15.1309	0.311983		0.0198621	0.0286724	0.034762	0.0312606	1.19677	0.032322	1	1	78.56
Q8IX90	Spindle and kinetochore-associated protein 3	SKA3	SKA3_HUMAN	3.85817	14.5019	0.0652591		0	0	0.00112364	0.00812943	0.00372691	0.00443866	1	1	64.85
P23141-3	Isoform 3 of Liver carboxylesterase 1	CES1	EST1_HUMAN	3.59564	12.0891	9.43587e-06	√	0.0292679	0.03002	0.0245013	0.314503	0.303706	0.394729	3	3	154.25
Q01105-2	Isoform 2 of Protein SET	SET	SET_HUMAN	3.55706	11.7701	0.584499		0.0771307	0.0503036	0.103933	0.0541096	2.63823	0.0308767	8	1	378.71
Q9BTX7	Alpha-tocopherol transfer protein-like	TTPAL	TTPAL_HUMAN	3.41204	10.6445	0.186514		0	0.00520448	0.00424174	0.0321567	0.0310541	0.0373398	1	1	45.33
P53814-5	Isoform B2 of Smoothelin	SMTN	SMTN_HUMAN	3.17526	9.03336	0.000375071		0.00834797	0.0152947	0.0142665	0.0998956	0.127787	0.114765	2	2	94.54
Q9H1X3-3	Isoform 3 of DnaJ homolog subfamily C member 25	DNAJC25	DJC25_HUMAN	3.162	8.9507	0.0017136		0.0105791	0.00828978	0.0194816	0.150278	0.0931075	0.0998781	1	1	29.4
P31350	Ribonucleoside-diphosphate reductase subunit M2	RRM2	RIR2_HUMAN	2.91517	7.54315	1.09172e-05	√	1.81543	1.45033	1.49492	11.5366	11.4668	12.9071	14	11	852.56
O75503	Ceroid-lipofuscinosis neuronal protein 5	CLN5	CLN5_HUMAN	2.88711	7.39788	0.0235124		0.00587588	0.0035705	0.000790736	0.0307903	0.0146024	0.0303403	1	1	44.75
O75496	Geminin	GMNN	GEMI_HUMAN	2.79991	6.96397	0.00162238	√	0.110783	0.0880194	0.196438	1.07061	0.905186	0.776647	3	3	161.55
O43924	Retinal rod rhodopsin-sensitive cGMP 3',5'-cyclic phosphodiesterase subunit delta	PDE6D	PDE6D_HUMAN	2.79856	6.95746	0.000952907		0.0107442	0.019415	0.0196747	0.0927389	0.113545	0.140433	1	1	58.56
Q15004-2	Isoform 2 of PCNA-associated factor	KIAA0101	PAF15_HUMAN	2.78697	6.90178	0.00355899		0.0074883	0.00581685	0.0133288	0.076857	0.0664021	0.0405626	1	1	91.68
P61764	Syntaxin-binding protein 1	STXBP1	STXB1_HUMAN	2.67366	6.38047	8.51908e-05		0.00821272	0.010163	0.00986706	0.0644172	0.0486002	0.0671851	1	1	25.98
Q9NQW6	Actin-binding protein anillin	ANLN	ANLN_HUMAN	2.63723	6.22137	5.4211e-05	√	0.250457	0.177571	0.198548	1.26826	1.3058	1.32409	8	8	307.72
Q9Y6A5	Transforming acidic coiled-coil-containing protein 3	TACC3	TACC3_HUMAN	2.4019	5.285	0.00536582	√	0.0877456	0.0432907	0.110594	0.543231	0.372604	0.361179	4	4	153.42
O43491	Band 4.1-like protein 2	EPB41L2	E41L2_HUMAN	2.35106	5.10198	0.256085		0.0455404	0.105403	0.0463238	0.0670564	0.843557	0.0958378	22	1	924.55
Q9UQB8-2	Isoform 2 of Brain-specific angiogenesis inhibitor 1-associated protein 2	BAIAP2	BAIP2_HUMAN	2.34942	5.09618	4.11614e-05	√	0.165258	0.1528	0.174144	0.923963	0.721561	0.862828	8	7	309.38
Q8NCC3	Group XV phospholipase A2	PLA2G15	PAG15_HUMAN	2.26347	4.80146	9.26844e-05		0.0370136	0.0430881	0.0416862	0.199836	0.218672	0.166252	2	2	103.95
P52943	Cysteine-rich protein 2	CRIP2	CRIP2_HUMAN	2.20112	4.59836	0.0366281		0.0582417	0.0246758	0.0997166	0.18811	0.470737	0.180971	1	1	29.43
Q96T23-2	Isoform 2 of Remodeling and spacing factor 1	RSF1	RSF1_HUMAN	2.1969	4.58492	0.0604335		0.0124003	0.00583062	0.00105127	0.0298789	0.0389084	0.0196199	1	1	81.07
Q96FF9	Sororin	CDCA5	CDCA5_HUMAN	2.1054	4.30318	0.000290799	√	0.103447	0.07703	0.0944199	0.450675	0.388747	0.343509	3	3	124.4
Q99538	Legumain	LGMN	LGMN_HUMAN	2.0003	4.00082	6.90003e-05		0.0999549	0.0877662	0.0787223	0.337661	0.325963	0.402368	2	2	83.57
P04183	Thymidine kinase, cytosolic	TK1	KITH_HUMAN	1.99602	3.98897	0.000110588	√	1.58743	1.23301	1.18315	5.08618	5.10742	5.77658	8	8	311.01
P05114	Non-histone chromosomal protein HMG-14	HMGN1	HMGN1_HUMAN	1.98011	3.94522	0.20564		0.24742	0.177699	0.183232	0.31933	1.84701	0.233743	3	3	140.85
Q99574	Neuroserpin	SERPINI1	NEUS_HUMAN	1.96524	3.90478	0.00138383	√	0.0598063	0.104027	0.0685987	0.30359	0.25427	0.349735	3	3	157.96
Q8WWK9-5	Isoform 3 of Cytoskeleton-associated protein 2	CKAP2	CKAP2_HUMAN	1.94981	3.86324	0.000303553	√	0.154487	0.17366	0.160973	0.637405	0.495844	0.756339	7	6	222.87
O75146	Huntingtin-interacting protein 1-related protein	HIP1R	HIP1R_HUMAN	1.83491	3.56748	0.00780558		0.0175317	0.0152199	0.0163963	0.0377337	0.087615	0.0499857	2	1	92.03
Q71U36-2	Isoform 2 of Tubulin alpha-1A chain	TUBA1A	TBA1A_HUMAN	1.81528	3.51929	0.0256163		0.0128014	0.00965199	0.0117796	0.054541	0.0469396	0.0189951	35	1	1637.95
P28676	Grancalcin	GCA	GRAN_HUMAN	1.79002	3.45819	0.000299592		0.075577	0.0632478	0.0763234	0.288383	0.219192	0.236449	2	2	70.83
Q13112	Chromatin assembly factor 1 subunit B	CHAF1B	CAF1B_HUMAN	1.78735	3.4518	0.00267985		0.0436796	0.0273879	0.0223002	0.112025	0.110553	0.0997091	2	2	100.96
Q93088	Betaine--homocysteine S-methyltransferase 1	BHMT	BHMT1_HUMAN	1.78712	3.45124	5.6707e-05	√	0.431677	0.501709	0.460191	1.4233	1.58918	1.7971	6	5	307.51
Q96RG2-4	Isoform 3 of PAS domain-containing serine/threonine-protein kinase	PASK	PASK_HUMAN	1.78065	3.43581	0.0132318		0.0067447	0.0197921	0.013641	0.0413323	0.0428936	0.0538174	1	1	32.43
P02545-2	Isoform C of Prelamin-A/C	LMNA	LMNA_HUMAN	1.70653	3.26374	0.123835		0.364874	0.354379	0.328258	0.518151	2.34653	0.554122	36	2	2171.11
P01033	Metalloproteinase inhibitor 1	TIMP1	TIMP1_HUMAN	1.70012	3.24927	0.000927881		0.014707	0.0230884	0.0160085	0.0601625	0.0518206	0.0628403	1	1	39.31
P50453	Serpin B9	SERPINB9	SPB9_HUMAN	1.64121	3.11927	4.54793e-07	√	1.01509	0.998313	0.934605	3.08531	2.97669	3.13363	11	10	573.66
P10636-4	Isoform Tau-B of Microtubule-associated protein tau	MAPT	TAU_HUMAN	1.6249	3.0842	0.00376079		0.00829557	0.00888956	0.0123489	0.03464	0.0335012	0.0229477	1	1	36.24
Q96KC8	DnaJ homolog subfamily C member 1	DNAJC1	DNJC1_HUMAN	1.61123	3.05512	0.184589		0.0466909	0.0451591	0.0485851	0.0626815	0.304944	0.0614215	3	3	135.61
Q9H1E3	Nuclear ubiquitous casein and cyclin-dependent kinase substrate 1	NUCKS1	NUCKS_HUMAN	1.57914	2.98792	0.160022		0.622834	0.30492	0.384409	1.10616	2.39416	0.42031	3	3	138.28
Q86Y79	Probable peptidyl-tRNA hydrolase	PTRH1	PTH_HUMAN	1.56114	2.95087	0.0472695		0.000778588	0.00223907	0.00115466	0.00356189	0.00623611	0.00251398	1	1	43.44
P06396-2	Isoform 2 of Gelsolin	GSN	GELS_HUMAN	1.5298	2.88746	0.00578729		0.179689	0.288027	0.288868	0.553076	0.864201	0.767328	11	1	558.43
Q9HBI6	Cytochrome P450 4F11	CYP4F11	CP4FB_HUMAN	1.52851	2.88487	0.0118579		0.0110872	0.0180042	0.00881332	0.0457988	0.0262314	0.03732	4	2	180.37
P52630-4	Isoform 2 of Signal transducer and activator of transcription 2	STAT2	STAT2_HUMAN	1.51642	2.86081	0.187731		0.0204144	0.0215759	0.0211977	0.0239906	0.125303	0.0314757	1	1	22.69
Q8IWF2	FAD-dependent oxidoreductase domain-containing protein 2	FOXRED2	FXRD2_HUMAN	1.50096	2.8303	0.0118473		0.0162277	0.0150517	0.0129619	0.0566057	0.0256116	0.0429988	1	1	54.64
Q96AK3	DNA dC->dU-editing enzyme APOBEC-3D	APOBEC3D	ABC3D_HUMAN	1.45673	2.74486	0.213873		0.00536243	0.0059163	0.00934208	0.00518451	0.0320551	0.0193616	1	1	20.61
Q96CP2	FLYWCH family member 2	FLYWCH2	FWCH2_HUMAN	1.44887	2.72994	0.00791786	√	0.153639	0.150253	0.204793	0.502103	0.563436	0.323143	4	4	137.94
Q63HM1	Kynurenine formamidase	AFMID	KFA_HUMAN	1.4436	2.71999	5.63694e-05		0.0198677	0.0217117	0.0218503	0.0623833	0.0551543	0.0549904	1	1	45.83
O15254-2	Isoform 2 of Peroxisomal acyl-coenzyme A oxidase 3	ACOX3	ACOX3_HUMAN	1.39429	2.62859	0.0108967		0.0264022	0.0258596	0.0224252	0.0526199	0.0943059	0.049396	1	1	18.37
Q53FA7	Quinone oxidoreductase PIG3	TP53I3	QORX_HUMAN	1.38415	2.61017	0.000409138	√	0.582544	0.581192	0.446971	1.5341	1.30397	1.36616	6	5	326.48
P31150	Rab GDP dissociation inhibitor alpha	GDI1	GDIA_HUMAN	1.33945	2.53055	4.93727e-05		0.241573	0.256367	0.212302	0.562004	0.607709	0.62759	12	2	528.68
Q02952-3	Isoform 3 of A-kinase anchor protein 12	AKAP12	AKA12_HUMAN	1.3298	2.51368	0.0420286		0.00629505	0.00361587	0.00473855	0.0151368	0.0148362	0.00685113	1	1	14.11
P35558	Phosphoenolpyruvate carboxykinase, cytosolic [GTP]	PCK1	PCKGC_HUMAN	1.32448	2.50442	6.54828e-05	√	0.494168	0.428152	0.484964	1.12732	1.16208	1.23504	4	3	179
P20248	Cyclin-A2	CCNA2	CCNA2_HUMAN	1.32194	2.50003	0.00127081	√	0.162823	0.12024	0.118625	0.360919	0.291305	0.352006	3	3	109.83
Q9BW19	Kinesin-like protein KIFC1	KIFC1	KIFC1_HUMAN	1.32113	2.49862	0.00054451	√	0.413358	0.315896	0.370391	0.990978	0.890128	0.866485	8	8	396.97
Q8N806	Putative E3 ubiquitin-protein ligase UBR7	UBR7	UBR7_HUMAN	1.3192	2.49527	0.00104234		0.0169933	0.0137197	0.0134199	0.0365622	0.0308407	0.0427207	1	1	24.45
Q9ULW0	Targeting protein for Xklp2	TPX2	TPX2_HUMAN	1.31884	2.49466	0.00619536	√	0.153549	0.117984	0.139504	0.296332	0.451134	0.277932	4	3	128.45
Q9UJ70	N-acetyl-D-glucosamine kinase	NAGK	NAGK_HUMAN	1.31489	2.48783	7.8463e-05	√	0.285077	0.296063	0.280524	0.730106	0.629192	0.78437	7	7	348.05
O14841	5-oxoprolinase	OPLAH	OPLA_HUMAN	1.31019	2.47973	0.0633352		0.0101122	0.00306675	0.00783075	0.0146196	0.023571	0.0139078	1	1	22.75
P49069	Calcium signal-modulating cyclophilin ligand	CAMLG	CAMLG_HUMAN	1.30797	2.47593	0.00795931		0.0371682	0.0404204	0.0250168	0.075741	0.107742	0.0705612	1	1	12.49
Q96GD4-2	Isoform 2 of Aurora kinase B	AURKB	AURKB_HUMAN	1.30714	2.47451	0.00235118	√	0.131702	0.0951826	0.103852	0.2505	0.234977	0.332932	4	4	105.86
O94992	Protein HEXIM1	HEXIM1	HEXI1_HUMAN	1.28125	2.4305	0.00428669	√	2.18057	2.19858	3.10636	6.24305	6.88357	5.06689	8	7	350.52
P04066	Tissue alpha-L-fucosidase	FUCA1	FUCO_HUMAN	1.27065	2.41271	0.00506837	√	0.260235	0.309639	0.274224	0.652343	0.500364	0.883856	3	3	102.6
P13716	Delta-aminolevulinic acid dehydratase	ALAD	HEM2_HUMAN	1.26735	2.40718	0.000166415	√	0.322153	0.299106	0.250029	0.694722	0.705208	0.697417	4	4	209.44
P23142	Fibulin-1	FBLN1	FBLN1_HUMAN	1.26124	2.39702	0.00506595		0.0277003	0.0231188	0.039744	0.0716077	0.0710728	0.0744016	6	1	226.57
Q9BXV9	Uncharacterized protein C14orf142	C14orf142	CN142_HUMAN	1.25853	2.39252	0.0335811		0.104026	0.0671257	0.160077	0.285811	0.311215	0.195443	2	2	78.7
Q9UBT3	Dickkopf-related protein 4	DKK4	DKK4_HUMAN	1.2582	2.39197	0.000770334		0.136212	0.12217	0.140117	0.352187	0.327876	0.273133	1	1	50.18
Q9HCS2	Cytochrome P450 4F12	CYP4F12	CP4FC_HUMAN	1.25422	2.38538	0.000305285		0.0766518	0.0891758	0.0861745	0.203786	0.174732	0.222602	4	2	213.13
P43121	Cell surface glycoprotein MUC18	MCAM	MUC18_HUMAN	1.2536	2.38436	0.000171259		0.0119592	0.0119064	0.0129353	0.0321634	0.0265013	0.0290819	1	1	25.97
Q8NFV4-4	Isoform 4 of Alpha/beta hydrolase domain-containing protein 11	ABHD11	ABHDB_HUMAN	1.24099	2.3636	0.273981		0.0209739	0.017602	0.0246743	0.0227143	0.103024	0.0237601	1	1	31.92
P14635	G2/mitotic-specific cyclin-B1	CCNB1	CCNB1_HUMAN	1.24005	2.36207	0.0187858		0.32681	0.258563	0.340213	0.528579	1.03792	0.619806	4	4	186.5
Q96CV9-2	Isoform 2 of Optineurin	OPTN	OPTN_HUMAN	1.22155	2.33197	0.00157889		0.0278012	0.031594	0.0262733	0.0805553	0.060972	0.0582495	1	1	46.83
O00560-3	Isoform 3 of Syntenin-1	SDCBP	SDCB1_HUMAN	1.21973	2.32903	0.0110163		0.0205499	0.025254	0.0165381	0.0364145	0.0632135	0.0455686	2	2	66.12
Q15628	Tumor necrosis factor receptor type 1-associated DEATH domain protein	TRADD	TRADD_HUMAN	1.21851	2.32706	0.016374		0.0368393	0.0434349	0.0315223	0.11822	0.059061	0.082877	1	1	69.51
Q92466-4	Isoform D3 of DNA damage-binding protein 2	DDB2	DDB2_HUMAN	1.21605	2.3231	0.00178471		0.127531	0.140882	0.0953004	0.262095	0.261624	0.32122	6	2	202.21
P60520	Gamma-aminobutyric acid receptor-associated protein-like 2	GABARAPL2	GBRL2_HUMAN	1.20348	2.30294	0.0043862		0.156974	0.167657	0.219518	0.462685	0.332944	0.457513	2	2	86.7
Q9P0R6	GSK3-beta interaction protein	GSKIP	GSKIP_HUMAN	1.19704	2.29269	0.0158544		0.0563336	0.0481105	0.0774337	0.181701	0.107195	0.128094	1	1	42.97
Q9H9P8	L-2-hydroxyglutarate dehydrogenase, mitochondrial	L2HGDH	L2HDH_HUMAN	1.19548	2.2902	0.00115974		0.0761273	0.0807696	0.0581136	0.15778	0.180328	0.154309	2	2	93.3
Q14643-4	Isoform 4 of Inositol 1,4,5-trisphosphate receptor type 1	ITPR1	ITPR1_HUMAN	1.18708	2.27692	0.0147032		0.0266895	0.0256655	0.0168525	0.0370648	0.0567217	0.0637933	8	1	255.61
Q13546	Receptor-interacting serine/threonine-protein kinase 1	RIPK1	RIPK1_HUMAN	1.18703	2.27684	9.55889e-06	√	0.0606512	0.0645748	0.060784	0.144022	0.14323	0.136263	3	3	82.05
Q8TCA0	Leucine-rich repeat-containing protein 20	LRRC20	LRC20_HUMAN	1.17225	2.25362	0.00978559	√	0.0267562	0.0142286	0.0168027	0.0417981	0.0459786	0.0424545	3	3	66.57
P42898	Methylenetetrahydrofolate reductase	MTHFR	MTHR_HUMAN	1.16516	2.24258	0.000693723	√	0.192569	0.184864	0.152726	0.414333	0.342363	0.432228	3	3	76.25
Q29960-2	Isoform 2 of HLA class I histocompatibility antigen, Cw-16 alpha chain	HLA-C	1C16_HUMAN	1.15728	2.23036	0.0125528		0.0314959	0.0610906	0.0403579	0.108479	0.0831581	0.104877	6	1	312.94
Q9H1E5	Thioredoxin-related transmembrane protein 4	TMX4	TMX4_HUMAN	1.15079	2.22035	6.32903e-06		0.0152948	0.0153818	0.0139641	0.0316842	0.0333419	0.034092	1	1	27.96
O43663-3	Isoform 3 of Protein regulator of cytokinesis 1	PRC1	PRC1_HUMAN	1.10437	2.15006	0.00367762		0.0251118	0.017287	0.0161171	0.0434885	0.0407205	0.0416036	1	1	53.89
Q15404	Ras suppressor protein 1	RSU1	RSU1_HUMAN	1.09841	2.14119	0.00387756		0.366692	0.325996	0.476161	0.919431	0.74658	0.836716	2	2	70.65
Q8IV08	Phospholipase D3	PLD3	PLD3_HUMAN	1.08932	2.12773	0.00157751		0.0934628	0.0787359	0.0751352	0.199548	0.149074	0.177639	2	2	86.82
Q9Y3X0	Coiled-coil domain-containing protein 9	CCDC9	CCDC9_HUMAN	1.08523	2.12171	0.0792329		0.0554634	0.0512641	0.0811433	0.125483	0.19651	0.0766149	1	1	21.38
P36639-4	Isoform p18 of 7,8-dihydro-8-oxoguanine triphosphatase	NUDT1	8ODP_HUMAN	1.08214	2.11717	0.000319396	√	0.220222	0.192689	0.223778	0.481283	0.430926	0.435769	3	3	155.84
Q99519	Sialidase-1	NEU1	NEUR1_HUMAN	1.07618	2.10845	0.000638755	√	1.11839	1.01062	1.00679	2.23388	1.88169	2.49611	6	6	303.32
O94952-1	Isoform 2 of F-box only protein 21	FBXO21	FBX21_HUMAN	1.07138	2.10144	0.0140008		0.0375297	0.0491898	0.0488813	0.0681658	0.118222	0.0985689	3	2	156.96
Q96PC3-3	Isoform 3 of AP-1 complex subunit sigma-3	AP1S3	AP1S3_HUMAN	1.07117	2.10114	0.0401549		0.0209594	0.0114319	0.0178335	0.0406576	0.0408704	0.0240013	1	1	34.57
A6NCE7	Microtubule-associated proteins 1A/1B light chain 3 beta 2	MAP1LC3B2	MP3B2_HUMAN	1.06842	2.09714	0.0057298		0.0979217	0.146228	0.144841	0.280015	0.236041	0.299709	2	2	82.59
Q9Y4G6	Talin-2	TLN2	TLN2_HUMAN	1.0646	2.09158	0.00204122		0.0349502	0.0431545	0.0298416	0.073919	0.0820154	0.0698443	8	1	380.22
Q5JU69	Torsin-2A	TOR2A	TOR2A_HUMAN	1.05754	2.08138	0.0299833		0.0277276	0.0128582	0.0225618	0.0467078	0.0365864	0.0481403	1	1	46.02
Q15059	Bromodomain-containing protein 3	BRD3	BRD3_HUMAN	1.05298	2.0748	0.022256		0.0379654	0.0702414	0.072866	0.133757	0.131057	0.110877	6	2	252.05
P13284	Gamma-interferon-inducible lysosomal thiol reductase	IFI30	GILT_HUMAN	1.05288	2.07466	0.011426		0.00795144	0.0097917	0.0114805	0.0250221	0.0157895	0.0198177	1	1	45.09
P53602	Diphosphomevalonate decarboxylase	MVD	MVD1_HUMAN	1.05251	2.07413	5.83301e-05	√	2.28364	2.24581	2.30108	4.40727	4.57405	5.18607	7	7	296.33
Q96GC9	Vacuole membrane protein 1	VMP1	VMP1_HUMAN	1.05045	2.07117	0.321888		0.370208	0.500228	0.37168	0.349661	1.70055	0.522428	4	4	178.73
Q9Y6K5	2'-5'-oligoadenylate synthase 3	OAS3	OAS3_HUMAN	1.04995	2.07046	0.26745		0.00152923	0.00638228	0.00556044	0.0114138	0.0034403	0.0130391	1	1	44.62
Q99661	Kinesin-like protein KIF2C	KIF2C	KIF2C_HUMAN	1.0475	2.06695	0.0222457		0.414094	0.262871	0.236383	0.515408	0.799833	0.572598	5	4	196.16
Q9H0H5	Rac GTPase-activating protein 1	RACGAP1	RGAP1_HUMAN	1.04336	2.06102	0.0052017	√	0.0635452	0.0440889	0.0478205	0.112442	0.0885968	0.119357	3	3	86.03
Q13907	Isopentenyl-diphosphate Delta-isomerase 1	IDI1	IDI1_HUMAN	1.03223	2.04519	0.00325883	√	10.8318	10.4614	10.2666	19.1341	26.5762	18.8356	11	11	512.86
Q9NPH2-2	Isoform 2 of Inositol-3-phosphate synthase 1	ISYNA1	INO1_HUMAN	1.0312	2.04372	0.00484937	√	0.618048	0.767699	0.697637	1.09452	1.57726	1.58607	4	4	145.5
P02792	Ferritin light chain	FTL	FRIL_HUMAN	1.02326	2.03251	0.00936331	√	3.16456	3.69838	4.69867	8.14406	8.90615	6.4489	6	6	391.18
P55011-3	Isoform 2 of Solute carrier family 12 member 2	SLC12A2	S12A2_HUMAN	0.991999	1.98894	0.134589		0.00725978	0.00534761	0.00621829	0.00931694	0.00697823	0.021148	2	1	63.15
Q14691	DNA replication complex GINS protein PSF1	GINS1	PSF1_HUMAN	0.980954	1.97377	0.0109289		0.0344237	0.0430225	0.0262387	0.076249	0.0714835	0.0569178	1	1	69.66
Q96EE4	Coiled-coil domain-containing protein 126	CCDC126	CC126_HUMAN	0.979382	1.97162	0.175015		0.0409793	0.0192105	0.046421	0.0949668	0.0806067	0.0346226	1	1	57.5
O94766	Galactosylgalactosylxylosylprotein 3-beta-glucuronosyltransferase 3	B3GAT3	B3GA3_HUMAN	0.977967	1.96969	0.0318671		0.212671	0.237511	0.193317	0.295942	0.593652	0.377899	2	2	65.58
Q04727-2	Isoform 2 of Transducin-like enhancer protein 4	TLE4	TLE4_HUMAN	0.97416	1.9645	0.338842		0	0.00499265	0.00358446	0.00388037	0.00540174	0.00756759	1	1	23.82
Q9NZQ3-3	Isoform 3 of NCK-interacting protein with SH3 domain	NCKIPSD	SPN90_HUMAN	0.966027	1.95345	0.0160718		0.0125308	0.0131214	0.0141902	0.0348175	0.0204117	0.022601	1	1	58.11
Q9Y2H0-3	Isoform 3 of Disks large-associated protein 4	DLGAP4	DLGP4_HUMAN	0.948851	1.93033	0.016668		0.376066	0.473882	0.672241	0.978576	1.05673	0.903033	3	3	143.62
Q96EQ0	Small glutamine-rich tetratricopeptide repeat-containing protein beta	SGTB	SGTB_HUMAN	0.947856	1.929	0.00227182		0.0758032	0.0654898	0.0843907	0.161096	0.135896	0.138354	1	1	50.17
Q9BY67-5	Isoform 5 of Cell adhesion molecule 1	CADM1	CADM1_HUMAN	0.94773	1.92884	0.0146401		0.874399	0.779559	1.09346	1.6106	2.20961	1.4791	6	6	265.16
P12277	Creatine kinase B-type	CKB	KCRB_HUMAN	0.94431	1.92427	7.01342e-05	√	3.71623	3.53996	3.84015	7.04947	6.75037	7.55249	8	7	500.68
P52732	Kinesin-like protein KIF11	KIF11	KIF11_HUMAN	0.943222	1.92282	0.00229413	√	1.28021	0.947364	0.955859	2.06471	2.09941	1.95704	11	11	531.47
Q9GZP4	PITH domain-containing protein 1	PITHD1	PITH1_HUMAN	0.938795	1.91693	0.00081869	√	0.542878	0.582068	0.619428	0.982485	1.21251	1.14884	7	6	222.48
Q99618	Cell division cycle-associated protein 3	CDCA3	CDCA3_HUMAN	0.936581	1.91399	0.00867277		0.136101	0.174482	0.202017	0.35277	0.34735	0.280988	1	1	71.2
Q9NWY4	UPF0609 protein C4orf27	C4orf27	CD027_HUMAN	0.934398	1.91109	0.00763329		0.0358153	0.0411298	0.0254362	0.0587545	0.0708315	0.0660741	1	1	12.13
Q9ULZ3-2	Isoform 2 of Apoptosis-associated speck-like protein containing a CARD	PYCARD	ASC_HUMAN	0.925404	1.89922	0.0323325		0.0788056	0.0667535	0.111799	0.181997	0.183897	0.122886	5	4	219.1
O14773-2	Isoform 2 of Tripeptidyl-peptidase 1	TPP1	TPP1_HUMAN	0.923008	1.89606	0.00111805	√	1.24592	1.23908	1.5147	2.50418	2.64214	2.43736	6	6	271.47
Q9H098	Protein FAM107B	FAM107B	F107B_HUMAN	0.917208	1.88846	0.0598812		0.339654	0.256574	0.447307	0.844352	0.678874	0.447445	3	3	163.04
P34059	N-acetylgalactosamine-6-sulfatase	GALNS	GALNS_HUMAN	0.915323	1.88599	0.0518665		0.0143688	0.0338067	0.0254361	0.0482167	0.0377108	0.0529034	1	1	19.36
P46952	3-hydroxyanthranilate 3,4-dioxygenase	HAAO	3HAO_HUMAN	0.913285	1.88333	0.00451754		0.0631946	0.0566664	0.0451411	0.118182	0.0987986	0.0937724	2	1	98.21
Q9C0A1-2	Isoform 2 of Zinc finger homeobox protein 2	ZFHX2	ZFHX2_HUMAN	0.910347	1.8795	0.0758619		0.0221899	0.00983053	0.0169834	0.0314135	0.0216136	0.0390754	1	1	11.16
Q9NYB0	Telomeric repeat-binding factor 2-interacting protein 1	TERF2IP	TE2IP_HUMAN	0.906168	1.87406	0.00887809	√	0.399703	0.426789	0.521277	0.849623	0.981589	0.69459	6	4	215.19
Q6NUM9	All-trans-retinol 13,14-reductase	RETSAT	RETST_HUMAN	0.898318	1.86389	8.34227e-05	√	1.86647	1.99765	1.7183	3.45833	3.27288	3.67382	12	12	513.23
Q9BUF5	Tubulin beta-6 chain	TUBB6	TBB6_HUMAN	0.895417	1.86015	0.000431677	√	0.295327	0.318589	0.28888	0.574302	0.491298	0.613734	25	4	1251.99
P55210-4	Isoform 4 of Caspase-7	CASP7	CASP7_HUMAN	0.889136	1.85207	0.00125333	√	0.100034	0.103963	0.0847838	0.171427	0.19823	0.165185	3	3	116.21
Q15291-2	Isoform 2 of Retinoblastoma-binding protein 5	RBBP5	RBBP5_HUMAN	0.88412	1.84564	0.277912		0.0163488	0.0314835	0.0362795	0.0614997	0.020575	0.0731653	1	1	48.86
P58107	Epiplakin	EPPK1	EPIPL_HUMAN	0.881581	1.84239	0.000533269	√	4.36155	4.91776	4.25546	7.45518	8.96186	8.51933	25	23	1397.08
Q14320	Protein FAM50A	FAM50A	FA50A_HUMAN	0.879962	1.84033	0.124201		0.0271025	0.0521327	0.0468043	0.114798	0.0478361	0.0693194	2	1	96.07
Q9BRT9	DNA replication complex GINS protein SLD5	GINS4	SLD5_HUMAN	0.879933	1.84029	0.0117789		0.109478	0.0924125	0.123669	0.241304	0.190559	0.167262	1	1	37.13
Q53T59	HCLS1-binding protein 3	HS1BP3	H1BP3_HUMAN	0.875389	1.8345	0.0156979		0.0349628	0.0271898	0.0301709	0.0689437	0.0425353	0.0578887	1	1	37.78
Q9BPX6	Calcium uptake protein 1, mitochondrial	MICU1	MICU1_HUMAN	0.870817	1.8287	0.206521		0.0372608	0.013034	0.00428926	0.0279801	0.0459583	0.0258793	1	1	26.09
Q9NXU5	ADP-ribosylation factor-like protein 15	ARL15	ARL15_HUMAN	0.869794	1.8274	0.00020723		0.0609114	0.0689412	0.0630399	0.108426	0.116511	0.127555	2	2	68.27
Q9UK59	Lariat debranching enzyme	DBR1	DBR1_HUMAN	0.865464	1.82193	0.253431		0.00296245	0.000542357	0.00112482	0.0040725	0.00136226	0.00300008	2	1	85.14
Q99988	Growth/differentiation factor 15	GDF15	GDF15_HUMAN	0.864632	1.82088	0.00577799	√	1.37123	1.63891	1.9648	3.05349	3.21424	2.79102	8	8	378.53
Q9H0A8-2	Isoform 2 of COMM domain-containing protein 4	COMMD4	COMD4_HUMAN	0.864195	1.82032	0.278266		0.0149532	0.0134353	0.0159519	0.0136532	0.0487496	0.0183111	1	1	45.15
P11413	Glucose-6-phosphate 1-dehydrogenase	G6PD	G6PD_HUMAN	0.863303	1.8192	8.10412e-05	√	17.4351	17.2982	16.4576	29.1457	29.9661	34.0147	39	37	1551.01
Q9NX46	Poly(ADP-ribose) glycohydrolase ARH3	ADPRHL2	ARHL2_HUMAN	0.860538	1.81572	0.0227308		0.0871632	0.110061	0.103279	0.151728	0.241091	0.152809	1	1	34.23
Q13501	Sequestosome-1	SQSTM1	SQSTM_HUMAN	0.859412	1.8143	0.000128066	√	1.13446	1.22896	1.22421	2.03832	2.27675	2.19397	5	5	222.16
Q9BX40	Protein LSM14 homolog B	LSM14B	LS14B_HUMAN	0.858378	1.813	0.00155604		0.402566	0.356993	0.419929	0.693987	0.785343	0.65908	2	2	92.15
P16278-2	Isoform 2 of Beta-galactosidase	GLB1	BGAL_HUMAN	0.858313	1.81292	0.00164763	√	0.874455	0.810704	0.649839	1.43049	1.31339	1.48928	3	3	159.37
Q6Y1H2	Very-long-chain (3R)-3-hydroxyacyl-[acyl-carrier protein] dehydratase 2	PTPLB	HACD2_HUMAN	0.85532	1.80916	0.328134		1.45429	0.557244	0.63227	2.05468	2.14006	0.588317	1	1	45.69
Q8IY17-5	Isoform 5 of Neuropathy target esterase	PNPLA6	PLPL6_HUMAN	0.854737	1.80843	0.0173449		0.0978835	0.0853845	0.060203	0.168183	0.147698	0.124419	3	3	138.51
Q4KMQ1	Taperin	TPRN	TPRN_HUMAN	0.845586	1.79699	0.0187567		0.0321892	0.0377441	0.0285133	0.0439738	0.0582611	0.0746734	1	1	101.7
P36405	ADP-ribosylation factor-like protein 3	ARL3	ARL3_HUMAN	0.842787	1.79351	0.00254787	√	0.880402	0.804624	0.899655	1.77001	1.33062	1.53502	3	3	143.47
P50416	Carnitine O-palmitoyltransferase 1, liver isoform	CPT1A	CPT1A_HUMAN	0.840496	1.79067	0.0012842	√	0.165073	0.174683	0.154687	0.251896	0.303097	0.330389	6	6	254.11
Q8N9N7	Leucine-rich repeat-containing protein 57	LRRC57	LRC57_HUMAN	0.837148	1.78651	0.0032963		0.079664	0.0701306	0.0635868	0.118877	0.112122	0.15021	1	1	42.16
Q9H6U8-2	Isoform 2 of Alpha-1,2-mannosyltransferase ALG9	ALG9	ALG9_HUMAN	0.835752	1.78479	0.268836		0.0137387	0.0325392	0.0077896	0.0143952	0.0349301	0.0471738	1	1	57.35
Q14019	Coactosin-like protein	COTL1	COTL1_HUMAN	0.833503	1.78201	0.00135902	√	0.563668	0.550446	0.53385	1.06353	0.826059	1.04709	5	5	222.25
P78540	Arginase-2, mitochondrial	ARG2	ARGI2_HUMAN	0.824767	1.77125	0.000327558		0.16014	0.165456	0.167663	0.300774	0.260057	0.312852	2	1	105.17
P83916	Chromobox protein homolog 1	CBX1	CBX1_HUMAN	0.822338	1.76827	0.0566022		0.831626	0.767085	1.02752	1.53778	2.04559	1.06052	6	4	334.45
P49005	DNA polymerase delta subunit 2	POLD2	DPOD2_HUMAN	0.82111	1.76677	0.00904514		0.0395559	0.032512	0.0284169	0.064257	0.0636093	0.0496669	2	2	58.06
Q9NR19	Acetyl-coenzyme A synthetase, cytoplasmic	ACSS2	ACSA_HUMAN	0.819757	1.76511	0.000329278	√	1.26546	1.26232	1.13912	2.27888	1.94155	2.25206	4	3	219.99
P10619-2	Isoform 2 of Lysosomal protective protein	CTSA	PPGB_HUMAN	0.819064	1.76426	0.00309805	√	1.33165	1.20412	1.21689	2.43187	1.81411	2.37469	5	5	298.04
P98160	Basement membrane-specific heparan sulfate proteoglycan core protein	HSPG2	PGBM_HUMAN	0.813673	1.75768	0.0015828		0.093997	0.0980924	0.0909803	0.175359	0.139252	0.182935	2	2	102.06
Q49AR2	UPF0489 protein C5orf22	C5orf22	CE022_HUMAN	0.804093	1.74605	0.00162867		0.0980174	0.0828507	0.0835002	0.165724	0.155896	0.139979	2	2	72.97
Q7LG56	Ribonucleoside-diphosphate reductase subunit M2 B	RRM2B	RIR2B_HUMAN	0.797894	1.73856	0.0122875		0.0704857	0.0686925	0.0916253	0.121067	0.117831	0.162368	5	2	263.09
O94864-2	Isoform 2 of STAGA complex 65 subunit gamma	SUPT7L	ST65G_HUMAN	0.797149	1.73766	0.0735173		0.0594344	0.0400796	0.0537544	0.115309	0.0917507	0.0592687	2	2	62.33
O94829	Importin-13	IPO13	IPO13_HUMAN	0.794888	1.73494	0.00131804		0.0264163	0.0249363	0.0235703	0.0433898	0.0477721	0.038825	1	1	42.96
Q9UHY1	Nuclear receptor-binding protein	NRBP1	NRBP_HUMAN	0.793754	1.73358	0.0300392		0.0271188	0.0329807	0.0311643	0.0495197	0.038634	0.0700594	1	1	44.2
Q9NVM9	Protein asunder homolog	ASUN	ASUN_HUMAN	0.789499	1.72847	0.0458939		0.0174406	0.0129016	0.0127469	0.0190557	0.0210805	0.0343423	1	1	35.08
P46108-2	Isoform Crk-I of Adapter molecule crk	CRK	CRK_HUMAN	0.78182	1.7193	0.0479081		0.0744793	0.0567291	0.0716145	0.159324	0.092884	0.0965053	1	1	43.4
Q567U6	Coiled-coil domain-containing protein 93	CCDC93	CCD93_HUMAN	0.777544	1.71421	0.200857		0.00717419	0.00145579	0.00596983	0.00929682	0.00756842	0.00816189	2	1	77.67
Q6PD74	Alpha- and gamma-adaptin-binding protein p34	AAGAB	AAGAB_HUMAN	0.77645	1.71291	0.110103		0.0168372	0.00634857	0.012083	0.015423	0.0221219	0.0228675	1	1	38.63
Q9H4B0	Probable tRNA N6-adenosine threonylcarbamoyltransferase, mitochondrial	OSGEPL1	OSGP2_HUMAN	0.775149	1.71137	0.980114		0.00198277	0.00232419	0.00383655	0.00662237	0.000360236	0.00695393	1	1	42.98
Q8N9N8	Probable RNA-binding protein EIF1AD	EIF1AD	EIF1A_HUMAN	0.773986	1.70999	0.0145768		0.189629	0.189316	0.240803	0.394546	0.377569	0.287647	3	3	87
P46013	Antigen KI-67	MKI67	KI67_HUMAN	0.771108	1.70658	0.00828581	√	3.99784	2.7089	3.40028	5.814	5.93256	5.50189	30	29	1224.82
P01040	Cystatin-A	CSTA	CYTA_HUMAN	0.764666	1.69898	0.10006		0.0699919	0.0496833	0.0694477	0.155431	0.0901936	0.0756904	1	1	28.54
P08236-3	Isoform 3 of Beta-glucuronidase	GUSB	BGLR_HUMAN	0.762718	1.69668	0.202463		0.0186697	0.029491	0.0423509	0.0463268	0.029559	0.0776839	2	2	53.48
Q6DKJ4	Nucleoredoxin	NXN	NXN_HUMAN	0.758618	1.69187	0.0188202		0.182964	0.20438	0.207002	0.251337	0.338635	0.415584	4	4	139.27
O75600	2-amino-3-ketobutyrate coenzyme A ligase, mitochondrial	GCAT	KBL_HUMAN	0.748311	1.67982	0.00588277	√	0.24933	0.29525	0.248548	0.378425	0.518156	0.435735	4	4	86.51
P17931	Galectin-3	LGALS3	LEG3_HUMAN	0.748045	1.67952	0.0267599		10.199	6.95955	9.98253	16.6864	16.3833	12.5143	8	8	327.84
P00491	Purine nucleoside phosphorylase	PNP	PNPH_HUMAN	0.747951	1.67941	0.000171514	√	3.95452	3.60007	3.40758	6.00856	5.95785	6.44353	10	10	498.9
O94901-9	Isoform 9 of SUN domain-containing protein 1	SUN1	SUN1_HUMAN	0.746131	1.67729	0.0111329		0.0416143	0.0502766	0.0322315	0.0620867	0.0697291	0.0763732	2	2	69.08
P42356	Phosphatidylinositol 4-kinase alpha	PI4KA	PI4KA_HUMAN	0.741619	1.67205	0.0307193		0.0822025	0.0660714	0.0709278	0.102292	0.160109	0.104115	2	2	76.5
P61916	Epididymal secretory protein E1	NPC2	NPC2_HUMAN	0.731035	1.65983	0.00155768	√	1.49169	1.51403	1.78695	2.70119	2.48421	2.76962	6	6	232.15
Q9BRF8	Calcineurin-like phosphoesterase domain-containing protein 1	CP	CPPED_HUMAN	0.724814	1.65269	0.0322303		4.55555	5.15063	5.72897	7.19951	11.0748	7.23518	13	12	609.8
Q9HCG7-2	Isoform 2 of Non-lysosomal glucosylceramidase	GBA2	GBA2_HUMAN	0.724623	1.65247	0.0373245		0.0148455	0.00807943	0.0093604	0.0177342	0.0161714	0.019445	1	1	13.91
Q8NG66-2	Isoform 2 of Serine/threonine-protein kinase Nek11	NEK11	NEK11_HUMAN	0.72389	1.65163	0.00659095		0.211203	0.185932	0.184933	0.376834	0.305171	0.279356	1	1	27.97
P28799	Granulins	GRN	GRN_HUMAN	0.723839	1.65157	0.130447		0.22754	0.236043	0.338051	0.595449	0.453981	0.274526	4	4	198.9
P29218	Inositol monophosphatase 1	IMPA1	IMPA1_HUMAN	0.720136	1.64734	0.00463324		0.201072	0.176336	0.166707	0.320061	0.250198	0.326082	1	1	54.61
Q9NRY5	Protein FAM114A2	FAM114A2	F1142_HUMAN	0.720036	1.64722	0.00105269	√	0.179268	0.19455	0.183856	0.341621	0.284226	0.292765	5	5	158.41
Q6JQN1-2	Isoform 2 of Acyl-CoA dehydrogenase family member 10	ACAD10	ACD10_HUMAN	0.714926	1.6414	0.00675201	√	0.0905595	0.129623	0.106131	0.163657	0.180498	0.191457	4	4	179.78
P05161	Ubiquitin-like protein ISG15	ISG15	ISG15_HUMAN	0.714294	1.64068	0.00431899	√	1.4129	1.04606	1.16483	2.06967	1.90115	1.97467	6	6	306.06
Q8TBE9	N-acylneuraminate-9-phosphatase	NANP	NANP_HUMAN	0.712548	1.6387	0.00545523		0.103099	0.0849404	0.103152	0.169773	0.165913	0.141488	1	1	79.47
P81605	Dermcidin	DCD	DCD_HUMAN	0.710578	1.63646	0.6735		0.11102	0.0500535	0.0478899	0.211403	0.104227	0.026329	1	1	32.02
P01009	Alpha-1-antitrypsin	SERPINA1	A1AT_HUMAN	0.709598	1.63535	0.00052441	√	18.2326	18.3033	18.4501	31.7308	30.5797	27.6108	23	23	1171.67
P15289-2	Isoform 2 of Arylsulfatase A	ARSA	ARSA_HUMAN	0.709268	1.63497	0.0141952		0.08844	0.0758099	0.0901309	0.155856	0.108863	0.151187	2	2	109.71
Q6EMK4	Vasorin	VASN	VASN_HUMAN	0.708397	1.63399	0.00996769	√	0.736891	0.644845	0.713479	1.35288	1.10233	0.968342	4	4	191.33
Q8TD19	Serine/threonine-protein kinase Nek9	NEK9	NEK9_HUMAN	0.707023	1.63243	0.00135326	√	0.144766	0.12722	0.119214	0.229238	0.203732	0.205638	4	4	148.08
Q6P6C2	RNA demethylase ALKBH5	ALKBH5	ALKB5_HUMAN	0.706715	1.63208	0.0220218		0.130294	0.17256	0.151413	0.217384	0.307767	0.216251	3	3	105.68
P17050	Alpha-N-acetylgalactosaminidase	NAGA	NAGAB_HUMAN	0.70493	1.63007	0.0356687		0.182191	0.201028	0.194965	0.325862	0.222179	0.394438	2	2	142.95
O60443	Non-syndromic hearing impairment protein 5	DFNA5	DFNA5_HUMAN	0.703608	1.62857	0.0482859		0.813276	0.541656	0.481939	1.07959	1.11914	0.792752	8	8	305.3
P41236	Protein phosphatase inhibitor 2	PPP1R2	IPP2_HUMAN	0.701518	1.62622	0.0394495		0.311726	0.263719	0.41973	0.629179	0.538913	0.450278	3	3	186.65
O43252	Bifunctional 3'-phosphoadenosine 5'-phosphosulfate synthase 1	PAPSS1	PAPS1_HUMAN	0.697552	1.62175	0.00109536	√	1.81667	1.95635	1.86204	2.67286	3.23877	3.22703	13	13	653.92
P02647	Apolipoprotein A-I	APOA1	APOA1_HUMAN	0.696083	1.6201	0.0344761		10.0179	9.07695	13.7593	20.155	18.3747	14.6973	12	11	688.69
Q9HBM1	Kinetochore protein Spc25	SPC25	SPC25_HUMAN	0.694435	1.61825	0.12165		0.0402571	0.0171111	0.0367511	0.0558665	0.0402734	0.0561688	1	1	18.4
Q8WVY7	Ubiquitin-like domain-containing CTD phosphatase 1	UBLCP1	UBCP1_HUMAN	0.693631	1.61735	0.0613134		0.0213602	0.0246779	0.0190155	0.0291452	0.0267836	0.0492857	2	2	43.66
Q13268	Dehydrogenase/reductase SDR family member 2, mitochondrial	DHRS2	DHRS2_HUMAN	0.690933	1.61433	0.000370909	√	82.5804	86.4457	74.8481	124.059	138.829	130.806	15	12	679.56
Q96CU9	FAD-dependent oxidoreductase domain-containing protein 1	FOXRED1	FXRD1_HUMAN	0.689601	1.61284	0.127701		0.116996	0.154371	0.106166	0.143984	0.300627	0.164288	2	2	72.07
P11388	DNA topoisomerase 2-alpha	TOP2A	TOP2A_HUMAN	0.683607	1.60615	0.000423745	√	5.08276	4.50465	4.56998	7.12768	7.50784	8.10337	37	23	1687.15
P22570-6	Isoform 6 of NADPH:adrenodoxin oxidoreductase, mitochondrial	FDXR	ADRO_HUMAN	0.683378	1.6059	0.00247245		0.0107542	0.0100185	0.0112399	0.0191953	0.0158494	0.0163641	11	1	422.71
O95342	Bile salt export pump	ABCB11	ABCBB_HUMAN	0.681155	1.60342	0.0283821		0.247862	0.244872	0.283752	0.361006	0.530927	0.353102	2	1	148.7
Q86X10-3	Isoform 3 of Ral GTPase-activating protein subunit beta	RALGAPB	RLGPB_HUMAN	0.680901	1.60314	0.35516		0.0775728	0.0724478	0.0739968	0.066869	0.212601	0.0796615	1	1	39.42
P09960	Leukotriene A-4 hydrolase	LTA4H	LKHA4_HUMAN	0.680511	1.60271	4.54141e-05	√	5.71297	5.99871	5.46989	8.71749	9.16674	9.6528	12	12	627.85
Q15599-2	Isoform 2 of Na(+)/H(+) exchange regulatory cofactor NHE-RF2	SLC9A3R2	NHRF2_HUMAN	0.680292	1.60246	0.304677		0.00116868	0.00557585	0.00691673	0.0107857	0.00545887	0.00564714	1	1	65.43
P08107	Heat shock 70 kDa protein 1A/1B	HSPA1A	HSP71_HUMAN	0.679963	1.6021	9.27351e-05	√	85.2097	88.1895	85.8777	128.841	142.105	144.441	32	30	1870.84
P41208	Centrin-2	CETN2	CETN2_HUMAN	0.671881	1.59315	0.100899		0.5468	0.506648	0.923767	1.15125	1.22136	0.777385	6	6	237.1
P24941	Cyclin-dependent kinase 2	CDK2	CDK2_HUMAN	0.66989	1.59095	0.000645808	√	1.13086	1.12494	1.03592	1.64685	1.63262	1.95749	10	7	460.53
P04899-6	Isoform 6 of Guanine nucleotide-binding protein G(i) subunit alpha-2	GNAI2	GNAI2_HUMAN	0.66557	1.58619	0.000267223	√	0.878982	0.889997	0.791003	1.29668	1.42582	1.33813	7	3	379.37
Q92845-2	Isoform 2 of Kinesin-associated protein 3	KIFAP3	KIFA3_HUMAN	0.664405	1.58492	0.188561		0.0345463	0.0366377	0.0473826	0.0416029	0.0969079	0.0494073	2	1	49.78
Q9UBS3	DnaJ homolog subfamily B member 9	DNAJB9	DNJB9_HUMAN	0.659113	1.57911	0.00249649		0.0310087	0.0320328	0.0301754	0.0529458	0.0417062	0.0525478	1	1	37.32
P09972	Fructose-bisphosphate aldolase C	ALDOC	ALDOC_HUMAN	0.647777	1.56675	0.00660864	√	19.1458	18.6714	15.5665	25.507	32.0226	26.1094	18	14	966
P04181	Ornithine aminotransferase, mitochondrial	OAT	OAT_HUMAN	0.647395	1.56634	6.35252e-05	√	18.5472	18.7213	17.1767	27.3983	29.3877	28.4937	22	19	1097.5
P56211-2	Isoform ARPP-16 of cAMP-regulated phosphoprotein 19	ARPP19	ARP19_HUMAN	0.640012	1.55834	0.384062		0.386299	0.253337	0.454299	0.492723	0.937062	0.27494	3	1	115.45
Q9UQ90	Paraplegin	SPG7	SPG7_HUMAN	0.634857	1.55278	0.0199197		0.286227	0.218313	0.216715	0.316556	0.435426	0.367969	4	4	125.14
P23497	Nuclear autoantigen Sp-100	SP100	SP100_HUMAN	0.634472	1.55237	0.00455798		0.113328	0.109088	0.127643	0.17272	0.163608	0.207092	3	1	85.5
P11216	Glycogen phosphorylase, brain form	PYGB	PYGB_HUMAN	0.634082	1.55195	0.000319851	√	8.24951	8.44144	7.83604	13.0007	11.5501	13.5139	27	23	1345.89
Q9ULK4-4	Isoform 4 of Mediator of RNA polymerase II transcription subunit 23	MED23	MED23_HUMAN	0.629585	1.54712	0.00285211		0.0460414	0.0473535	0.0465831	0.0787851	0.0616641	0.0761135	2	2	79.91
O95295	SNARE-associated protein Snapin	SNAPIN	SNAPN_HUMAN	0.62918	1.54669	0.0851322		0.25462	0.235765	0.342884	0.517636	0.462561	0.308608	1	1	84.5
P49006	MARCKS-related protein	MARCKSL1	MRP_HUMAN	0.626669	1.544	0.290309		4.30772	3.31859	5.0024	5.82356	10.0955	3.57959	4	4	158.74
P07686	Beta-hexosaminidase subunit beta	HEXB	HEXB_HUMAN	0.626489	1.5438	0.00666889	√	1.88322	2.10685	1.96781	2.96832	2.60402	3.62545	10	10	375.88
Q86Y82	Syntaxin-12	STX12	STX12_HUMAN	0.623522	1.54063	0.0136739		0.634927	0.486491	0.621089	0.937482	0.951763	0.795317	5	4	120.17
Q92599-2	Isoform 2 of Septin-8	SEPT8	SEPT8_HUMAN	0.622865	1.53993	0.0308908		0.0937565	0.057173	0.070816	0.11077	0.105468	0.125235	4	2	113.69
Q9HD15	Steroid receptor RNA activator 1	SRA1	SRA1_HUMAN	0.621701	1.53869	0.144112		0.22831	0.157971	0.305028	0.457796	0.350876	0.255037	2	2	40.64
Q8NBT2-2	Isoform 2 of Kinetochore protein Spc24	SPC24	SPC24_HUMAN	0.61968	1.53653	0.0630781		0.0549403	0.0467996	0.0636639	0.084286	0.105565	0.0642981	1	1	110.58
P51553	Isocitrate dehydrogenase [NAD] subunit gamma, mitochondrial	IDH3G	IDH3G_HUMAN	0.617145	1.53384	0.11953		0.459586	0.670053	0.550061	0.557845	1.09834	0.920206	6	6	234.2
O94832	Unconventional myosin-Id	MYO1D	MYO1D_HUMAN	0.61625	1.53289	0.000752638	√	0.784284	0.693567	0.650233	1.0689	1.09546	1.09775	13	12	478.9
Q96LW7-2	Isoform 2 of Bcl10-interacting CARD protein	C9orf89	BINCA_HUMAN	0.616183	1.53281	0.00812355		0.0735461	0.0557513	0.0649099	0.106604	0.0985388	0.0925414	1	1	25.59
Q9UK23-2	Isoform 2 of N-acetylglucosamine-1-phosphodiester alpha-N-acetylglucosaminidase	NAGPA	NAGPA_HUMAN	0.613657	1.53013	0.208901		0.0204498	0.00458247	0.00740507	0.0157774	0.0184894	0.0153666	1	1	53.71
P30711;P05154	Glutathione S-transferase theta-1	GSTT1	GSTT1_HUMAN	0.612925	1.52936	0.000699557	√	0.880051	0.962267	0.952887	1.43882	1.48974	1.3463	7	5	369.93
Q9UK76	Hematological and neurological expressed 1 protein	HN1	HN1_HUMAN	0.61182	1.52819	0.224546		4.36332	3.13936	6.14671	6.91243	9.64253	4.30384	7	7	302.88
P31947	14-3-3 protein sigma	SFN	1433S_HUMAN	0.610257	1.52653	0.00400041	√	2.75374	2.4685	2.95659	4.32663	4.31203	3.8466	10	6	500.3
Q8N129	Protein canopy homolog 4	CNPY4	CNPY4_HUMAN	0.609437	1.52566	0.113522		0.103932	0.073363	0.150539	0.190298	0.17679	0.133076	2	2	65.07
O60573	Eukaryotic translation initiation factor 4E type 2	EIF4E2	IF4E2_HUMAN	0.608398	1.52456	0.679055		0.0236885	0.0268407	0.0163691	0.0154263	0.0699034	0.0166611	3	2	136.86
P10909-4	Isoform 4 of Clusterin	CLU	CLUS_HUMAN	0.607847	1.52398	0.0120792		22.623	21.4332	26.1004	39.5158	36.5071	30.8944	19	19	929.75
Q9NZD2	Glycolipid transfer protein	GLTP	GLTP_HUMAN	0.606541	1.5226	0.0535878		0.0346537	0.0358578	0.0454078	0.0622967	0.0693216	0.0448809	1	1	30.07
Q9NVP2	Histone chaperone ASF1B	ASF1B	ASF1B_HUMAN	0.606452	1.52251	0.0257362		0.344137	0.2927	0.217988	0.474444	0.385532	0.441503	1	1	84.25
Q9NX18	Succinate dehydrogenase assembly factor 2, mitochondrial	SDHAF2	SDHF2_HUMAN	0.60384	1.51976	0.318258		0.0282181	0.0113325	0.034977	0.0575207	0.031588	0.0241549	1	1	77.41
Q96JY6	PDZ and LIM domain protein 2	PDLIM2	PDLI2_HUMAN	0.602428	1.51827	0.0164373		0.0311657	0.0234261	0.0261094	0.0469601	0.0359694	0.0395969	1	1	64.81
P84157-2	Isoform 2 of Matrix-remodeling-associated protein 7	MXRA7	MXRA7_HUMAN	0.602271	1.5181	0.238364		0.184305	0.154651	0.206633	0.246539	0.415549	0.166173	3	1	163.5
Q9NPQ8-4	Isoform 4 of Synembryn-A	RIC8A	RIC8A_HUMAN	0.602121	1.51795	0.00584974	√	0.198519	0.227244	0.216296	0.291654	0.372085	0.310872	7	6	253.81
Q5T0N5-3	Isoform 3 of Formin-binding protein 1-like	FNBP1L	FBP1L_HUMAN	0.600759	1.51651	0.00358347		0.0179546	0.014416	0.0171892	0.0254495	0.0239499	0.0257588	1	1	24.26
Q96KR6	Protein FAM210B	FAM210B	F210B_HUMAN	0.598457	1.5141	0.0837647		0.252429	0.173063	0.192301	0.329239	0.378594	0.227566	2	2	79.27
Q92882	Osteoclast-stimulating factor 1	OSTF1	OSTF1_HUMAN	0.5981	1.51372	0.0526066		0.226114	0.230153	0.257025	0.368669	0.442129	0.268928	2	2	100.46
Q14493	Histone RNA hairpin-binding protein	SLBP	SLBP_HUMAN	0.594473	1.50992	0.0582709		0.0449578	0.0300411	0.0406198	0.0691176	0.0584795	0.046978	1	1	48.61
O96005	Cleft lip and palate transmembrane protein 1	CLPTM1	CLPT1_HUMAN	0.594243	1.50968	0.104862		0.504559	0.449108	0.433025	0.528043	0.983255	0.582163	5	5	245.92
P55061	Bax inhibitor 1	TMBIM6	BI1_HUMAN	0.592275	1.50762	0.0813993		0.0317277	0.0189842	0.0223013	0.0410677	0.027569	0.0414398	2	1	57.73
Q8IXM6	Nurim	NRM	NRM_HUMAN	0.58981	1.50505	0.0843415		0.183428	0.210603	0.163467	0.204851	0.374462	0.259749	1	1	15.59
O60271-4	Isoform 4 of C-Jun-amino-terminal kinase-interacting protein 4	SPAG9	JIP4_HUMAN	0.587352	1.50249	0.000277791	√	0.730966	0.682681	0.66348	1.04689	1.06887	1.0051	13	12	569.43
Q7Z3C6-2	Isoform 2 of Autophagy-related protein 9A	ATG9A	ATG9A_HUMAN	0.58597	1.50105	0.0282553		0.0757548	0.0898807	0.0901424	0.137609	0.0988166	0.147509	2	2	81.17
P30043	Flavin reductase (NADPH)	BLVRB	BLVRB_HUMAN	0.585806	1.50088	1.58063e-05	√	1.34967	1.30312	1.27741	1.98716	1.94821	1.96339	4	4	229.71
Q7Z4H3-2	Isoform 2 of HD domain-containing protein 2	HDDC2	HDDC2_HUMAN	0.58558	1.50064	0.0026532	√	0.0790359	0.0822937	0.0916639	0.133661	0.127117	0.118875	3	3	83
Q8IY18	Structural maintenance of chromosomes protein 5	SMC5	SMC5_HUMAN	0.584832	1.49986	0.568887		1.32272	0.225879	0.253083	1.40837	1.09045	0.203456	1	1	11.94
Q9UHQ9	NADH-cytochrome b5 reductase 1	CYB5R1	NB5R1_HUMAN	0.579643	1.49448	0.00316704	√	0.988805	1.14709	0.993767	1.37537	1.65238	1.64947	8	8	266.41
Q16514-2	Isoform TAFII15 of Transcription initiation factor TFIID subunit 12	TAF12	TAF12_HUMAN	0.578728	1.49353	0.0593665		0.0368848	0.0235323	0.0250752	0.0510865	0.0357644	0.0408345	1	1	26.49
Q9Y3L5	Ras-related protein Rap-2c	RAP2C	RAP2C_HUMAN	0.578369	1.49316	0.308748		0.630295	0.306049	0.257768	0.878215	0.563824	0.340963	3	2	109.52
Q9Y547	Intraflagellar transport protein 25 homolog	HSPB11	IFT25_HUMAN	0.574931	1.48961	0.0426492		0.404289	0.38158	0.295601	0.434526	0.65798	0.518457	2	2	115.28
Q8NEZ5	F-box only protein 22	FBXO22	FBX22_HUMAN	0.574749	1.48942	0.000620905	√	0.57427	0.527127	0.545567	0.811529	0.758483	0.883006	4	4	195.12
A8MT69	Centromere protein X	STRA13	CENPX_HUMAN	0.573956	1.4886	0.393646		0.0103659	0.00327351	0.0188353	0.0182939	0.0220601	0.00798777	1	1	62.53
O75506	Heat shock factor-binding protein 1	HSBP1	HSBP1_HUMAN	0.57301	1.48762	0.189396		0.67257	0.588295	0.802705	0.843036	1.5079	0.718882	2	2	80.77
Q8N5M1	ATP synthase mitochondrial F1 complex assembly factor 2	ATPAF2	ATPF2_HUMAN	0.570368	1.4849	0.0038867		0.089453	0.0861498	0.086271	0.144392	0.112467	0.131998	2	2	117.49
P21266;Q03013-3	Glutathione S-transferase Mu 3	GSTM3	GSTM3_HUMAN	0.56979	1.48431	0.00170613	√	4.03939	3.97276	3.49471	6.03771	5.14386	5.89814	10	9	451.74
P51784	Ubiquitin carboxyl-terminal hydrolase 11	USP11	UBP11_HUMAN	0.568629	1.48311	0.000815648	√	0.770757	0.704053	0.648498	1.02029	1.01387	1.11494	7	7	263.27
P28340	DNA polymerase delta catalytic subunit	POLD1	DPOD1_HUMAN	0.566777	1.48121	0.00134214	√	0.219672	0.243587	0.201585	0.338699	0.303553	0.342522	6	5	279.74
O95721	Synaptosomal-associated protein 29	SNAP29	SNP29_HUMAN	0.55929	1.47354	0.0986084		0.108602	0.0860581	0.140851	0.19598	0.171161	0.127249	3	2	115.21
Q8WXX5	DnaJ homolog subfamily C member 9	DNAJC9	DNJC9_HUMAN	0.557009	1.47122	0.00796021	√	5.60665	5.44992	6.89526	9.0341	8.90517	8.47175	15	15	765.79
Q9NUM4	Transmembrane protein 106B	TMEM106B	T106B_HUMAN	0.555603	1.46978	0.0210689		0.122043	0.155634	0.134501	0.201779	0.166232	0.237802	3	3	96.74
Q14764	Major vault protein	MVP	MVP_HUMAN	0.555139	1.46931	0.00397695	√	3.07185	2.61386	2.36411	3.91611	4.01716	3.89443	15	15	662.63
P04156-2	Isoform 2 of Major prion protein	PRNP	PRIO_HUMAN	0.550144	1.46423	0.0310307		1.30992	1.09891	1.45596	2.22424	1.75676	1.67795	3	3	181.16
Q6QNY1	Biogenesis of lysosome-related organelles complex 1 subunit 2	BLOC1S2	BL1S2_HUMAN	0.549729	1.46381	0.14901		0.203479	0.168634	0.273744	0.391961	0.333054	0.220398	1	1	18.55
Q02241-2	Isoform 2 of Kinesin-like protein KIF23	KIF23	KIF23_HUMAN	0.54864	1.46271	0.0065504	√	0.242827	0.191391	0.188623	0.28719	0.307223	0.31662	3	3	74.5
P51688	N-sulphoglucosamine sulphohydrolase	SGSH	SPHM_HUMAN	0.54737	1.46142	0.104399		0.147519	0.142206	0.149992	0.268763	0.143268	0.230581	2	1	112.74
P63208	S-phase kinase-associated protein 1	SKP1	SKP1_HUMAN	0.543381	1.45738	0.0156094		8.55289	7.89651	9.8203	13.3022	13.7894	11.1934	8	8	392.98
Q27J81-2	Isoform 2 of Inverted formin-2	INF2	INF2_HUMAN	0.542602	1.4566	0.121142		0.361397	0.314935	0.333261	0.357133	0.678434	0.435003	5	5	261.37
Q04446	1,4-alpha-glucan-branching enzyme	GBE1	GLGB_HUMAN	0.541045	1.45503	0.00512636	√	1.01453	1.23146	1.04223	1.45818	1.53036	1.79589	9	9	406.91
Q9NRX3	NADH dehydrogenase [ubiquinone] 1 alpha subcomplex subunit 4-like 2	NDUFA4L2	NUA4L_HUMAN	0.539809	1.45378	0.0111611		0.0179979	0.0248949	0.0223274	0.0319094	0.0299487	0.0329579	1	1	29.4
P09382	Galectin-1	LGALS1	LEG1_HUMAN	0.538829	1.45279	0.0753415		0.772975	0.561231	0.851794	1.30312	0.923038	0.949652	4	4	243.3
Q86XI2	Condensin-2 complex subunit G2	NCAPG2	CNDG2_HUMAN	0.538776	1.45274	0.0249991		0.0307405	0.0284551	0.0356784	0.0376457	0.0497832	0.0503983	1	1	45.63
Q9UL54-2	Isoform 2 of Serine/threonine-protein kinase TAO2	TAOK2	TAOK2_HUMAN	0.53607	1.45002	0.072848		0.0298085	0.0322133	0.0217449	0.0471779	0.0304005	0.0438849	2	1	71.58
Q13309	S-phase kinase-associated protein 2	SKP2	SKP2_HUMAN	0.535948	1.44989	0.00840845		0.119889	0.0938445	0.0966327	0.147315	0.138438	0.164246	2	2	51.21
P07099	Epoxide hydrolase 1	EPHX1	HYEP_HUMAN	0.53355	1.44749	0.0006488	√	12.1122	13.398	11.6578	16.9102	17.6493	19.2407	19	18	796.89
A2VDF0-2	Isoform 2 of Fucose mutarotase	FUOM	FUCM_HUMAN	0.53349	1.44743	0.0998397		0.00954798	0.012072	0.0162157	0.0141812	0.018897	0.0216863	1	1	22.89
O95857	Tetraspanin-13	TSPAN13	TSN13_HUMAN	0.531568	1.4455	0.00507674		0.109366	0.136778	0.113832	0.181535	0.157736	0.181074	2	2	87.6
Q03519-2	Isoform 2 of Antigen peptide transporter 2	TAP2	TAP2_HUMAN	0.529137	1.44307	0.00236616		0.0203304	0.0232548	0.019269	0.0303092	0.0277289	0.0326646	1	1	63.85
P30047	GTP cyclohydrolase 1 feedback regulatory protein	GCHFR	GFRP_HUMAN	0.528887	1.44282	0.000317529		1.06116	1.05162	0.993837	1.38595	1.50173	1.59459	2	2	65.08
P39060-2	Isoform 3 of Collagen alpha-1(XVIII) chain	COL18A1	COIA1_HUMAN	0.528695	1.44262	1.04843e-05	√	0.895701	0.90455	0.913149	1.29442	1.29717	1.32282	6	6	288.93
O75391	Sperm-associated antigen 7	SPAG7	SPAG7_HUMAN	0.528654	1.44258	0.115883		0.48261	0.368645	0.558771	0.767779	0.769856	0.496444	4	4	152.07
Q9H0W8-2	Isoform 2 of Protein SMG9	SMG9	SMG9_HUMAN	0.527403	1.44133	0.0106864		0.18786	0.248639	0.183655	0.295198	0.280185	0.318465	1	1	50.97
Q9UK22	F-box only protein 2	FBXO2	FBX2_HUMAN	0.526518	1.44045	0.000493817	√	4.00759	4.54439	4.16475	6.27979	5.78419	6.25382	8	8	370.96
Q9Y3P9	Rab GTPase-activating protein 1	RABGAP1	RBGP1_HUMAN	0.526293	1.44022	0.000138041		0.176148	0.172524	0.166547	0.243205	0.234218	0.264609	2	2	93.77
Q9H0B6	Kinesin light chain 2	KLC2	KLC2_HUMAN	0.52458	1.43851	0.140228		0.138228	0.11999	0.163375	0.197452	0.265394	0.143621	9	3	353.83
P16083	Ribosyldihydronicotinamide dehydrogenase [quinone]	NQO2	NQO2_HUMAN	0.524454	1.43839	0.00725823	√	1.21153	1.35641	1.08695	1.65871	1.95102	1.64741	5	5	216.62
Q9BVA1	Tubulin beta-2B chain	TUBB2B	TBB2B_HUMAN	0.523476	1.43741	0.0190871		0.16709	0.146242	0.132868	0.241138	0.178042	0.222194	41	1	2068.75
O43488	Aflatoxin B1 aldehyde reductase member 2	AKR7A2	ARK72_HUMAN	0.522361	1.4363	0.000246237	√	10.4615	10.7496	10.1581	15.0172	13.9539	16.0846	11	11	478.27
Q96S44	TP53-regulating kinase	TP53RK	PRPK_HUMAN	0.521514	1.43546	0.0753324		0.416001	0.436988	0.369305	0.484967	0.773441	0.496149	3	3	80.76
Q9UM22	Mammalian ependymin-related protein 1	EPDR1	EPDR1_HUMAN	0.521425	1.43537	0.454966		0.0526359	0.0178648	0.0511904	0.0900814	0.0560778	0.0285129	1	1	36.42
Q9C0E8-3	Isoform 3 of Protein lunapark	LNP	LNP_HUMAN	0.519631	1.43359	0.00217613	√	0.78434	0.818884	0.691912	1.15529	0.998673	1.13631	3	3	157.92
Q7Z4W1	L-xylulose reductase	DCXR	DCXR_HUMAN	0.515992	1.42998	0.00306787	√	12.4135	14.4377	12.2688	16.9503	18.6155	20.3749	8	8	464.29
Q13228-2	Isoform 2 of Selenium-binding protein 1	SELENBP1	SBP1_HUMAN	0.514806	1.4288	0.00400117	√	1.24565	1.20264	1.02888	1.54591	1.79178	1.6305	7	7	282.41
Q7L523	Ras-related GTP-binding protein A	RRAGA	RRAGA_HUMAN	0.514694	1.42869	0.0629807		0.0194595	0.0284092	0.0183456	0.0274353	0.028578	0.0385866	1	1	17.69
Q9H1P3-2	Isoform 2 of Oxysterol-binding protein-related protein 2	OSBPL2	OSBL2_HUMAN	0.513571	1.42758	0.00526729		0.0438009	0.0545538	0.0499978	0.0695218	0.0652247	0.0770385	1	1	19.48
Q96LJ7	Dehydrogenase/reductase SDR family member 1	DHRS1	DHRS1_HUMAN	0.512531	1.42655	0.104217		0.244164	0.253588	0.190905	0.264388	0.438638	0.279379	4	3	213.14
P09104	Gamma-enolase	ENO2	ENOG_HUMAN	0.510247	1.42429	0.00415687	√	0.93911	0.96561	0.975067	1.48542	1.38909	1.22715	13	6	745.86
Q13509	Tubulin beta-3 chain	TUBB3	TBB3_HUMAN	0.50886	1.42293	0.0480576		14.1767	16.3145	18.2601	18.6353	27.6223	23.1119	42	11	2314.72
P25440	Bromodomain-containing protein 2	BRD2	BRD2_HUMAN	0.508016	1.42209	0.00134868		0.089621	0.0876126	0.0796195	0.130879	0.113988	0.120401	3	2	125.42
Q9GZT4	Serine racemase	SRR	SRR_HUMAN	0.507805	1.42189	0.00870959		0.0792913	0.0743616	0.0760234	0.102856	0.12481	0.098908	1	1	39.83
Q9H832	Ubiquitin-conjugating enzyme E2 Z	UBE2Z	UBE2Z_HUMAN	0.506228	1.42033	0.0912518		0.264829	0.347739	0.368959	0.419471	0.369243	0.60538	4	4	128.98
Q14807-2;Q7L775	Isoform 2 of Kinesin-like protein KIF22	KIF22	KIF22_HUMAN	0.505365	1.41948	0.0081462	√	0.168653	0.137876	0.154472	0.19697	0.234653	0.22276	5	4	182.16
Q03001-8	Isoform 2 of Dystonin	DST	DYST_HUMAN	0.504085	1.41822	0.383454		0.0190707	0.00398497	0.0026746	0.0204754	0.00701188	0.00900395	2	1	55.66
Q96KB5	Lymphokine-activated killer T-cell-originated protein kinase	PBK	TOPK_HUMAN	0.501386	1.41557	0.0147343		0.466103	0.38943	0.351989	0.60329	0.499854	0.606192	3	2	108.28
Q9NRG4	N-lysine methyltransferase SMYD2	SMYD2	SMYD2_HUMAN	0.500711	1.41491	0.0558303		0.0711328	0.104053	0.0994572	0.107391	0.144206	0.136999	1	1	28.43
Q9UP95-5	Isoform 5 of Solute carrier family 12 member 4	SLC12A4	S12A4_HUMAN	0.499797	1.41401	0.00252815	√	0.576882	0.618238	0.526025	0.746985	0.872005	0.814734	7	7	284.33
Q969Z3-2	Isoform 2 of Mitochondrial amidoxime reducing component 2	MARC2	MARC2_HUMAN	0.495782	1.41008	0.500473		0.00367346	0.000795073	0.00402538	0.00606783	0.00170053	0.00420877	2	1	93.12
O00244	Copper transport protein ATOX1	ATOX1	ATOX1_HUMAN	0.495013	1.40933	0.223783		0.735165	0.520303	1.13526	1.45473	1.07621	0.838391	3	3	138.9
P15121	Aldose reductase	AKR1B1	ALDR_HUMAN	0.494637	1.40897	0.013738		4.78191	5.1762	4.54489	5.95973	7.93148	6.54304	9	8	380.09
O00767	Acyl-CoA desaturase	SCD	ACOD_HUMAN	0.494491	1.40882	0.00254882		2.88378	2.44954	2.45337	3.6807	3.72857	3.56081	2	2	101.06
Q8TD22	Sideroflexin-5	SFXN5	SFXN5_HUMAN	0.493964	1.40831	0.114867		0.0179627	0.0227598	0.0162411	0.0222682	0.02151	0.0364442	1	1	28.21
P13929-2	Isoform 2 of Beta-enolase	ENO3	ENOB_HUMAN	0.492835	1.40721	0.449138		0.466277	0.116598	0.128661	0.453155	0.404882	0.143241	11	2	634.54
Q8IWT0-2	Isoform 2 of Protein archease	ZBTB8OS	ARCH_HUMAN	0.492042	1.40643	0.444565		0.074416	0.137974	0.136997	0.270035	0.0916418	0.129714	1	1	49.33
Q8IZ52-2	Isoform 2 of Chondroitin sulfate synthase 2	CHPF	CHSS2_HUMAN	0.491029	1.40545	0.0270224		0.038874	0.0514013	0.0409786	0.0651694	0.0512709	0.06803	1	1	14.33
Q9UFN0	Protein NipSnap homolog 3A	NIPSNAP3A	NPS3A_HUMAN	0.49082	1.40524	0.0212148		0.100077	0.115384	0.0790623	0.135279	0.127219	0.151379	2	2	83.86
P46940	Ras GTPase-activating-like protein IQGAP1	IQGAP1	IQGA1_HUMAN	0.487908	1.40241	0.000482321	√	8.30217	8.83614	8.43474	11.0645	12.2702	12.5292	31	24	1496.91
Q99653	Calcineurin B homologous protein 1	CHP1	CHP1_HUMAN	0.486909	1.40144	0.0157932		0.647679	0.603664	0.685525	1.03887	0.868527	0.807002	3	3	116.32
Q02218	2-oxoglutarate dehydrogenase, mitochondrial	OGDH	ODO1_HUMAN	0.48638	1.40093	0.000150317	√	3.65173	3.73245	3.64897	4.89984	5.03844	5.51833	19	18	879.22
Q13542	Eukaryotic translation initiation factor 4E-binding protein 2	EIF4EBP2	4EBP2_HUMAN	0.485093	1.39968	0.83582		0.0760633	0.022004	0.0748721	0.0900513	0.136984	0.0150243	1	1	33.45
Q8N5B7-2	Isoform 2 of Ceramide synthase 5	CERS5	CERS5_HUMAN	0.484478	1.39908	0.202953		0.0127359	0.00801044	0.0100654	0.0106223	0.01202	0.0204657	1	1	24.29
O95071-2	Isoform 2 of E3 ubiquitin-protein ligase UBR5	UBR5	UBR5_HUMAN	0.476743	1.3916	0.587057		0.0154036	0.0179901	0.0119846	0.00937514	0.0364104	0.0173629	1	1	21.12
P33897	ATP-binding cassette sub-family D member 1	ABCD1	ABCD1_HUMAN	0.476637	1.3915	0.0130086		0.340757	0.326571	0.269645	0.396149	0.484599	0.423046	2	2	84.97
Q9NP97	Dynein light chain roadblock-type 1	DYNLRB1	DLRB1_HUMAN	0.476171	1.39105	0.165103		1.23524	0.876835	1.58534	2.17194	1.5795	1.39184	2	2	81.99
P62256-2	Isoform 2 of Ubiquitin-conjugating enzyme E2 H	UBE2H	UBE2H_HUMAN	0.475317	1.39022	0.381569		0.0324707	0.0365686	0.0354771	0.0686643	0.0249551	0.0516817	1	1	21.44
O95219	Sorting nexin-4	SNX4	SNX4_HUMAN	0.471879	1.38691	0.00242664		0.153075	0.141345	0.132722	0.212095	0.184857	0.195457	2	2	141.02
Q9NUQ9	Protein FAM49B	FAM49B	FA49B_HUMAN	0.470443	1.38553	0.000211216	√	0.858087	0.878103	0.818338	1.10923	1.17918	1.25097	4	4	214.34
O60885	Bromodomain-containing protein 4	BRD4	BRD4_HUMAN	0.469456	1.38459	0.0156853		0.667629	0.57066	0.694243	0.870088	0.984047	0.821623	8	4	305.43
Q7L266	Isoaspartyl peptidase/L-asparaginase	ASRGL1	ASGL1_HUMAN	0.467322	1.38254	0.0171119		1.54381	1.46115	1.802	2.17253	2.43433	2.03895	5	5	253.44
O60784	Target of Myb protein 1	TOM1	TOM1_HUMAN	0.467318	1.38254	0.00565301	√	1.04791	1.14297	1.21144	1.44564	1.69713	1.56106	11	10	481.3
P56962	Syntaxin-17	STX17	STX17_HUMAN	0.467122	1.38235	0.226651		0.556694	0.31507	0.280979	0.679079	0.534594	0.379821	2	2	53.68
P49593	Protein phosphatase 1F	PPM1F	PPM1F_HUMAN	0.466085	1.38136	0.150756		0.0596647	0.0648642	0.0346824	0.085552	0.07591	0.0584655	1	1	60.07
Q12962	Transcription initiation factor TFIID subunit 10	TAF10	TAF10_HUMAN	0.465094	1.38041	0.265421		0.210728	0.16116	0.261012	0.358052	0.33282	0.182787	2	2	60.03
Q4G148-2	Isoform 2 of Glucoside xylosyltransferase 1	GXYLT1	GXLT1_HUMAN	0.464962	1.38028	0.00104935	√	0.201407	0.221692	0.224306	0.299339	0.282482	0.311779	5	5	209.25
P23511-2	Isoform Short of Nuclear transcription factor Y subunit alpha	NFYA	NFYA_HUMAN	0.464323	1.37967	0.0473177		0.278201	0.30966	0.405944	0.403223	0.482072	0.485827	1	1	71.69
P37235	Hippocalcin-like protein 1	HPCAL1	HPCL1_HUMAN	0.464173	1.37953	0.0322693		2.41899	2.22201	2.90714	3.95446	3.1581	3.3003	7	7	350.08
Q5U5X0	Complex III assembly factor LYRM7	LYRM7	LYRM7_HUMAN	0.463853	1.37922	0.0769356		0.349392	0.276761	0.377045	0.555489	0.444719	0.383423	2	2	100.69
Q9H6S3	Epidermal growth factor receptor kinase substrate 8-like protein 2	EPS8L2	ES8L2_HUMAN	0.463727	1.3791	0.00498168	√	1.72376	1.54107	1.65826	2.23331	2.45006	2.10607	8	8	313.99
P01011	Alpha-1-antichymotrypsin	SERPINA3	AACT_HUMAN	0.463239	1.37863	0.00303211	√	0.490942	0.505248	0.407297	0.649059	0.639924	0.64591	3	3	162.43
P63218	Guanine nucleotide-binding protein G(I)/G(S)/G(O) subunit gamma-5	GNG5	GBG5_HUMAN	0.462398	1.37783	0.237903		0.970497	0.750356	0.970192	1.06207	1.77117	0.874567	1	1	45.13
O43768-6	Isoform 6 of Alpha-endosulfine	ENSA	ENSA_HUMAN	0.462233	1.37767	0.154267		1.47756	1.25043	1.83451	2.49277	2.28155	1.51131	4	2	173.49
Q9H936	Mitochondrial glutamate carrier 1	SLC25A22	GHC1_HUMAN	0.460779	1.37628	0.00607661	√	1.74333	1.77161	1.46839	2.15427	2.48517	2.21905	5	5	253.34
Q9UPN4-2	Isoform 2 of Centrosomal protein of 131 kDa	CEP131	CP131_HUMAN	0.458937	1.37453	0.0594401		0.0423215	0.0339936	0.0302537	0.0525836	0.0538408	0.0400576	2	2	90.75
P18206-2	Isoform 1 of Vinculin	VCL	VINC_HUMAN	0.458896	1.37449	0.000210056	√	11.0576	11.4662	11.1039	14.5612	15.2098	16.4499	27	26	1389.42
Q8IUX1-3	Isoform 3 of Complex I assembly factor TMEM126B, mitochondrial	TMEM126B	T126B_HUMAN	0.458814	1.37441	0.10774		0.07911	0.0662944	0.0584774	0.0723454	0.119776	0.0880957	1	1	23.96
P06703	Protein S100-A6	S100A6	S10A6_HUMAN	0.458297	1.37392	0.203451		0.478718	0.349411	0.438376	0.804287	0.513412	0.422375	1	1	52.3
Q96A49	Synapse-associated protein 1	SYAP1	SYAP1_HUMAN	0.458238	1.37386	0.0722693		1.1329	0.899636	1.17419	1.64771	1.58309	1.17482	5	5	244.93
Q16762	Thiosulfate sulfurtransferase	TST	THTR_HUMAN	0.457643	1.3733	0.000486659	√	17.8933	19.8852	17.1083	25.1341	24.756	25.4857	21	21	950.67
Q8TF65	PDZ domain-containing protein GIPC2	GIPC2	GIPC2_HUMAN	0.456985	1.37267	0.0116541		0.281698	0.290996	0.261825	0.326255	0.378882	0.440383	4	4	176.38
P07858	Cathepsin B	CTSB	CATB_HUMAN	0.456465	1.37218	0.0200842		5.48063	5.75297	6.73967	9.21182	7.36405	8.08661	9	8	465.88
P11234	Ras-related protein Ral-B	RALB	RALB_HUMAN	0.455228	1.371	0.149675		0.286655	0.435813	0.336564	0.396119	0.399458	0.656354	6	3	241.08
Q7Z434	Mitochondrial antiviral-signaling protein	MAVS	MAVS_HUMAN	0.454758	1.37055	0.0806376		5.94746	5.8396	6.30216	7.05618	10.6778	7.0583	11	11	579.04
Q9C0C2	182 kDa tankyrase-1-binding protein	TNKS1BP1	TB182_HUMAN	0.454613	1.37041	0.269666		0.0351523	0.0426457	0.0657768	0.0876927	0.0435332	0.0655312	1	1	32.62
Q9NX70	Mediator of RNA polymerase II transcription subunit 29	MED29	MED29_HUMAN	0.453816	1.36966	0.176643		0.149452	0.112243	0.169403	0.256282	0.187096	0.147078	2	2	131.34
Q92851-4	Isoform D of Caspase-10	CASP10	CASPA_HUMAN	0.45377	1.36961	0.247259		0.0303041	0.0154364	0.0446455	0.0445139	0.0436114	0.0356686	1	1	57.54
P49643	DNA primase large subunit	PRIM2	PRI2_HUMAN	0.453238	1.36911	0.247524		0.192778	0.0999796	0.0804909	0.182064	0.204801	0.124153	1	1	18.99
Q16775-2	Isoform 2 of Hydroxyacylglutathione hydrolase, mitochondrial	HAGH	GLO2_HUMAN	0.453198	1.36907	0.0057199	√	0.924463	1.01499	0.859957	1.2666	1.14148	1.42451	5	5	236.23
Q9UJC3	Protein Hook homolog 1	HOOK1	HOOK1_HUMAN	0.45306	1.36894	0.0031202	√	0.235905	0.274565	0.222001	0.344295	0.328021	0.330394	5	5	235.52
Q99956	Dual specificity protein phosphatase 9	DUSP9	DUS9_HUMAN	0.45233	1.36825	0.0212671		0.235436	0.206082	0.224267	0.283997	0.352806	0.274155	4	4	137.2
Q8IWJ2	GRIP and coiled-coil domain-containing protein 2	GCC2	GCC2_HUMAN	0.451872	1.36781	0.0251723		0.0487524	0.0431287	0.0421851	0.0668676	0.0650193	0.0514907	5	4	160.95
Q9NXK8-2	Isoform 2 of F-box/LRR-repeat protein 12	FBXL12	FXL12_HUMAN	0.451456	1.36742	0.00872882	√	0.242218	0.305119	0.239666	0.341165	0.34855	0.386449	3	3	115.74
Q86VR2	Protein FAM134C	FAM134C	F134C_HUMAN	0.45139	1.36736	0.00300801	√	0.992078	0.903966	0.85982	1.243	1.33374	1.1915	3	3	124.7
Q9NVG8	TBC1 domain family member 13	TBC1D13	TBC13_HUMAN	0.451248	1.36722	0.00230906	√	0.425086	0.418651	0.424419	0.545787	0.539469	0.648596	4	4	114.79
Q9BQP7	Mitochondrial genome maintenance exonuclease 1	MGME1	MGME1_HUMAN	0.450196	1.36623	0.000786991	√	1.98776	1.81551	1.75795	2.51594	2.58977	2.49217	8	8	339.59
Q8TF74	WAS/WASL-interacting protein family member 2	WIPF2	WIPF2_HUMAN	0.449621	1.36568	0.238327		0.0863525	0.071025	0.114208	0.15788	0.129921	0.0830994	2	2	89.5
Q9NWV4	UPF0587 protein C1orf123	C1orf123	CA123_HUMAN	0.449212	1.36529	0.0118235		2.1808	2.03329	2.26848	3.26432	2.94331	2.64299	4	4	195.46
P19022	Cadherin-2	CDH2	CADH2_HUMAN	0.449068	1.36516	0.109854		0.240865	0.176256	0.255283	0.379432	0.279184	0.259321	2	2	108.57
Q96HY6	DDRGK domain-containing protein 1	DDRGK1	DDRGK_HUMAN	0.448913	1.36501	0.0966731		5.07865	4.77509	5.91239	7.18461	8.77954	5.5568	9	9	782.48
Q14240	Eukaryotic initiation factor 4A-II	EIF4A2	IF4A2_HUMAN	0.447219	1.36341	0.00467892	√	0.969968	0.826774	0.838174	1.15739	1.2714	1.16369	17	3	951.82
Q9H2G2-2;O94804	Isoform 2 of STE20-like serine/threonine-protein kinase	SLK	SLK_HUMAN	0.446796	1.36301	0.0848661		0.0719155	0.103706	0.0817428	0.113527	0.093278	0.143985	2	2	79.61
Q14108-2	Isoform 2 of Lysosome membrane protein 2	SCARB2	SCRB2_HUMAN	0.446164	1.36241	0.0101929		0.541447	0.587634	0.634564	0.872434	0.714926	0.815453	2	2	43.91
Q6P1R4	tRNA-dihydrouridine(16/17) synthase [NAD(P)(+)]-like	DUS1L	DUS1L_HUMAN	0.445985	1.36224	0.156751		0.177668	0.13746	0.110958	0.253725	0.170282	0.156425	3	2	104.47
Q9NR12-2	Isoform 2 of PDZ and LIM domain protein 7	PDLIM7	PDLI7_HUMAN	0.445817	1.36209	0.107227		0.0953307	0.114119	0.107003	0.135436	0.107659	0.187941	2	2	68.59
Q96C57	Uncharacterized protein C12orf43	C12orf43	CL043_HUMAN	0.444973	1.36129	0.247405		0.238334	0.177873	0.30334	0.349709	0.409695	0.220107	2	2	129.11
Q9H4M9	EH domain-containing protein 1	EHD1	EHD1_HUMAN	0.443293	1.3597	0.0074244	√	3.85514	4.28621	4.37808	5.03363	6.02076	5.96834	19	17	862.74
P04424-2	Isoform 2 of Argininosuccinate lyase	ASL	ARLY_HUMAN	0.443018	1.35944	0.0013312	√	2.27432	2.34789	2.05153	3.02612	2.80906	3.23739	9	8	545.66
Q9BR76	Coronin-1B	CORO1B	COR1B_HUMAN	0.442626	1.35908	0.0169443		1.92794	2.22317	1.86691	2.3193	3.00224	2.8574	8	8	388.76
Q5TA45-2	Isoform 2 of Integrator complex subunit 11	CPSF3L	INT11_HUMAN	0.441628	1.35814	0.0633933		0.0321595	0.0250524	0.0233836	0.0364354	0.0296509	0.0433732	1	1	54.79
Q96T17-5	Isoform 5 of MAP7 domain-containing protein 2	MAP7D2	MA7D2_HUMAN	0.438379	1.35508	0.267467		0.0813614	0.0558102	0.108709	0.104673	0.148425	0.0800903	1	1	23.8
P55327-2	Isoform 2 of Tumor protein D52	TPD52	TPD52_HUMAN	0.437534	1.35429	0.18083		0.650027	0.682933	0.740081	0.976834	1.19024	0.640421	3	3	125.09
P45973	Chromobox protein homolog 5	CBX5	CBX5_HUMAN	0.437003	1.35379	0.00291533	√	7.38295	7.76612	8.57313	10.9167	10.4609	10.7373	11	10	710.43
P10253;Q06033-2	Lysosomal alpha-glucosidase	GAA	LYAG_HUMAN	0.436189	1.35303	0.00685397	√	2.74166	3.31001	3.13839	3.88003	4.00155	4.55282	10	10	516.79
Q8IYQ7	Threonine synthase-like 1	THNSL1	THNS1_HUMAN	0.435171	1.35207	0.119363		0.0432496	0.0638865	0.0406097	0.0692277	0.0513485	0.0791866	2	2	45.6
Q9Y478	5'-AMP-activated protein kinase subunit beta-1	PRKAB1	AAKB1_HUMAN	0.434856	1.35178	0.0204028		0.116691	0.113569	0.123909	0.186081	0.142847	0.149829	2	2	83.71
Q6NTF9	Rhomboid domain-containing protein 2	RHBDD2	RHBD2_HUMAN	0.433615	1.35061	0.0732525		0.237169	0.249512	0.202344	0.268075	0.39076	0.271771	1	1	38.23
Q9BRX5	DNA replication complex GINS protein PSF3	GINS3	PSF3_HUMAN	0.43313	1.35016	0.202371		0.0684307	0.0753443	0.152111	0.149409	0.119066	0.131018	4	4	85.88
Q9UBC5	Unconventional myosin-Ia	MYO1A	MYO1A_HUMAN	0.432516	1.34959	0.308588		0.033257	0.0590307	0.058554	0.0426777	0.0884288	0.0724674	3	1	132.37
Q9H0T7	Ras-related protein Rab-17	RAB17	RAB17_HUMAN	0.43148	1.34862	0.000573017		0.300084	0.284215	0.275339	0.376943	0.402805	0.379574	2	2	93.83
O75528-2	Isoform 2 of Transcriptional adapter 3	TADA3	TADA3_HUMAN	0.430663	1.34785	0.135344		0.0456505	0.0342011	0.0606931	0.062844	0.0718674	0.0547222	1	1	53.65
P22570	NADPH:adrenodoxin oxidoreductase, mitochondrial	FDXR	ADRO_HUMAN	0.429879	1.34712	0.0120144		1.05954	1.15133	1.04169	1.47812	1.24637	1.65711	15	4	694.57
Q7L9L4	MOB kinase activator 1B	MOB1B	MOB1B_HUMAN	0.42924	1.34652	0.0137632		0.498028	0.442358	0.419282	0.687959	0.574086	0.56878	4	2	125.24
O95235	Kinesin-like protein KIF20A	KIF20A	KI20A_HUMAN	0.428798	1.34611	0.42955		0.00788638	0.00666743	0.00625937	0.0123523	0.00471608	0.0109485	1	1	47.78
Q13451	Peptidyl-prolyl cis-trans isomerase FKBP5	FKBP5	FKBP5_HUMAN	0.427982	1.34535	0.00912735	√	4.33109	4.38879	4.16943	5.01925	6.41424	5.90716	15	14	634.03
Q9BWS9-3	Isoform 3 of Chitinase domain-containing protein 1	CHID1	CHID1_HUMAN	0.42786	1.34524	0.011912		0.118494	0.107262	0.0945928	0.149109	0.127358	0.154478	2	2	101.81
Q16134	Electron transfer flavoprotein-ubiquinone oxidoreductase, mitochondrial	ETFDH	ETFD_HUMAN	0.427622	1.34501	0.00486378		0.114606	0.117316	0.106254	0.146663	0.136769	0.171419	2	2	115.36
Q9H6E5	Speckle targeted PIP5K1A-regulated poly(A) polymerase	TUT1	STPAP_HUMAN	0.427457	1.34486	0.566534		0.0887771	0.0295658	0.0237696	0.0860397	0.0816731	0.0234088	1	1	21.18
P04080	Cystatin-B	CSTB	CYTB_HUMAN	0.427433	1.34484	0.0532485		1.69321	1.41435	1.87478	2.4002	2.39701	1.90324	3	3	139.58
Q9NQR4	Omega-amidase NIT2	NIT2	NIT2_HUMAN	0.426737	1.34419	0.00300811	√	0.96192	0.989475	0.80616	1.21667	1.22191	1.2681	4	4	198.66
Q9BRZ2	E3 ubiquitin-protein ligase TRIM56	TRIM56	TRI56_HUMAN	0.4265	1.34397	0.0491495		0.21259	0.189943	0.158444	0.294338	0.240767	0.21883	2	2	65.91
Q8NHP8	Putative phospholipase B-like 2	PLBD2	PLBL2_HUMAN	0.426257	1.34374	0.0502037		0.588475	0.621593	0.627994	0.86971	0.638769	0.961403	5	5	216.76
Q8NFW8	N-acylneuraminate cytidylyltransferase	CMAS	NEUA_HUMAN	0.425732	1.34325	0.125299		0.104179	0.148746	0.134599	0.156844	0.138669	0.22503	3	3	142.95
P80404	4-aminobutyrate aminotransferase, mitochondrial	ABAT	GABT_HUMAN	0.425423	1.34297	0.00371756	√	7.64966	8.87339	7.93903	9.99616	11.1487	11.7069	19	18	974.5
Q9NPD8	Ubiquitin-conjugating enzyme E2 T	UBE2T	UBE2T_HUMAN	0.423901	1.34155	0.131803		0.231925	0.138606	0.169821	0.293931	0.213501	0.217478	2	2	72.99
P38571-2	Isoform 2 of Lysosomal acid lipase/cholesteryl ester hydrolase	LIPA	LICH_HUMAN	0.422129	1.3399	0.00901626	√	0.714982	0.780274	0.692955	0.849546	1.05767	1.02478	3	3	116.06
Q16891-2	Isoform 2 of Mitochondrial inner membrane protein	IMMT	IMMT_HUMAN	0.420945	1.3388	0.383942		1.35506	1.26843	1.11625	1.15203	2.62662	1.22814	28	2	1500.88
Q9NUT2-2	Isoform Short of ATP-binding cassette sub-family B member 8, mitochondrial	ABCB8	ABCB8_HUMAN	0.420855	1.33872	0.000750107	√	0.198685	0.204091	0.207015	0.256252	0.284263	0.275825	4	4	173.53
Q9ULC3	Ras-related protein Rab-23	RAB23	RAB23_HUMAN	0.417913	1.33599	0.0149356		0.22872	0.208875	0.174309	0.286098	0.247907	0.283494	3	2	118.42
O96007	Molybdopterin synthase catalytic subunit	MOCS2	MOC2B_HUMAN	0.417477	1.33559	0.0128572		0.110284	0.107552	0.12217	0.149467	0.134132	0.170508	2	2	124.12
O95425-2	Isoform 2 of Supervillin	SVIL	SVIL_HUMAN	0.416435	1.33463	0.0521563		0.0687393	0.0725043	0.066447	0.082914	0.113829	0.0804467	1	1	17.01
Q15418	Ribosomal protein S6 kinase alpha-1	RPS6KA1	KS6A1_HUMAN	0.416237	1.33444	0.000402786	√	4.58723	4.52625	4.17201	5.86111	5.60941	6.25819	23	13	1176.17
O95716	Ras-related protein Rab-3D	RAB3D	RAB3D_HUMAN	0.416022	1.33424	0.145975		0.358647	0.381843	0.386427	0.50291	0.352965	0.647707	5	3	210.05
O75223	Gamma-glutamylcyclotransferase	GGCT	GGCT_HUMAN	0.414492	1.33283	0.0178783		0.674707	0.58907	0.507229	0.820507	0.805806	0.734135	3	3	144.87
P45877	Peptidyl-prolyl cis-trans isomerase C	PPIC	PPIC_HUMAN	0.414251	1.33261	0.0582197		0.0117055	0.0104128	0.00759677	0.0145069	0.0126692	0.0124224	1	1	43.28
O95817	BAG family molecular chaperone regulator 3	BAG3	BAG3_HUMAN	0.413772	1.33216	0.226752		0.114275	0.0942752	0.178536	0.198042	0.188997	0.128623	2	2	118.26
P00441	Superoxide dismutase [Cu-Zn]	SOD1	SODC_HUMAN	0.413423	1.33184	0.178832		20.351	18.6355	24.5059	30.1666	34.3125	20.0828	3	3	210.63
P34896-2	Isoform 2 of Serine hydroxymethyltransferase, cytosolic	SHMT1	GLYC_HUMAN	0.413236	1.33167	0.00339185	√	1.69922	1.69064	1.49343	2.26677	1.96763	2.26853	9	7	530.65
O00764-2	Isoform 2 of Pyridoxal kinase	PDXK	PDXK_HUMAN	0.412726	1.3312	0.0463434		1.94748	2.29731	2.14546	2.26377	3.16335	3.07957	8	8	328.09
P30876	DNA-directed RNA polymerase II subunit RPB2	POLR2B	RPB2_HUMAN	0.412701	1.33118	0.360154		0.362632	0.337971	0.287334	0.332503	0.67493	0.307686	4	4	156.95
P20810-4	Isoform 4 of Calpastatin	CAST	ICAL_HUMAN	0.411983	1.33051	0.0863883		3.17423	2.99239	4.06435	4.57656	5.24941	3.78647	14	14	666.17
Q5VTR2	E3 ubiquitin-protein ligase BRE1A	RNF20	BRE1A_HUMAN	0.411751	1.3303	0.00740259	√	0.232033	0.248485	0.202741	0.274172	0.315923	0.318843	5	5	248.78
Q9BRT3	Migration and invasion enhancer 1	MIEN1	MIEN1_HUMAN	0.411634	1.33019	0.220495		0.0613552	0.046561	0.0640516	0.105225	0.0591259	0.0643987	1	1	40.82
P63098	Calcineurin subunit B type 1	PPP3R1	CANB1_HUMAN	0.411445	1.33002	0.119252		0.0737072	0.0821933	0.110319	0.141738	0.1129	0.0994379	1	1	38.02
Q8IWV8	E3 ubiquitin-protein ligase UBR2	UBR2	UBR2_HUMAN	0.410918	1.32953	0.509878		0.0854668	0.0473038	0.0342429	0.101711	0.0852636	0.0350754	1	1	27.13
Q86Y37-2	Isoform 2 of CDK2-associated and cullin domain-containing protein 1	CACUL1	CACL1_HUMAN	0.409247	1.32799	0.00857839		0.0221437	0.0183588	0.0212581	0.0262186	0.0284879	0.0273112	1	1	29.63
P00492	Hypoxanthine-guanine phosphoribosyltransferase	HPRT1	HPRT_HUMAN	0.408635	1.32743	0.00283356	√	2.24919	2.19922	2.23881	3.21507	2.83646	2.82528	10	10	544.06
Q16819	Meprin A subunit alpha	MEP1A	MEP1A_HUMAN	0.408614	1.32741	0.0204127		0.0675569	0.0773025	0.0727625	0.101294	0.0807731	0.106806	1	1	44.31
Q8WVC6	Dephospho-CoA kinase domain-containing protein	DCAKD	DCAKD_HUMAN	0.408612	1.32741	0.00648076	√	0.924781	0.914942	0.759127	1.15513	1.06491	1.22969	8	7	331.25
Q03518	Antigen peptide transporter 1	TAP1	TAP1_HUMAN	0.407271	1.32617	0.0604084		0.0650574	0.066497	0.054142	0.080256	0.0660982	0.0999116	2	2	97.54
Q92820	Gamma-glutamyl hydrolase	GGH	GGH_HUMAN	0.404823	1.32393	0.00326318	√	3.8164	3.96166	3.58054	4.98763	4.53032	5.52	9	9	404.34
Q86X76-2	Isoform 1 of Nitrilase homolog 1	NIT1	NIT1_HUMAN	0.403779	1.32297	0.0322569		0.0580098	0.053694	0.0526753	0.0777506	0.0587112	0.0810067	1	1	43.24
Q96S66	Chloride channel CLIC-like protein 1	CLCC1	CLCC1_HUMAN	0.40221	1.32153	0.00604435	√	0.223065	0.240384	0.216555	0.293819	0.26817	0.336657	7	6	332.19
Q53HL2	Borealin	CDCA8	BOREA_HUMAN	0.401943	1.32129	0.246362		0.273237	0.253294	0.290956	0.453469	0.391353	0.235312	3	3	171.99
P62993	Growth factor receptor-bound protein 2	GRB2	GRB2_HUMAN	0.399992	1.3195	0.0396195		1.50109	1.34074	1.6395	2.25231	1.69302	1.96778	10	10	387.55
Q14149	MORC family CW-type zinc finger protein 3	MORC3	MORC3_HUMAN	0.399347	1.31891	0.105909		0.239514	0.152275	0.219349	0.233101	0.267185	0.305751	2	2	43.96
P53396	ATP-citrate synthase	ACLY	ACLY_HUMAN	0.399286	1.31885	0.000463673	√	30.9213	29.8298	27.9908	38.6585	37.1373	41.242	38	37	2065.76
Q96CM8	Acyl-CoA synthetase family member 2, mitochondrial	ACSF2	ACSF2_HUMAN	0.399075	1.31866	0.0002014	√	1.43986	1.46094	1.31974	1.85092	1.86784	1.84672	8	8	316.76
Q9BTU6	Phosphatidylinositol 4-kinase type 2-alpha	PI4K2A	P4K2A_HUMAN	0.39699	1.31676	0.0252713		0.168191	0.156066	0.159353	0.236877	0.176334	0.223587	3	3	196.28
Q9NXJ5	Pyroglutamyl-peptidase 1	PG	PGPI_HUMAN	0.396756	1.31654	0.134069		0.076802	0.105423	0.0712265	0.0868069	0.107407	0.139467	2	2	82.62
Q9NRW7	Vacuolar protein sorting-associated protein 45	VPS45	VPS45_HUMAN	0.396218	1.31605	0.0223786		0.230498	0.250871	0.202371	0.284655	0.339708	0.275476	4	4	165.31
O00400	Acetyl-coenzyme A transporter 1	SLC33A1	ACATN_HUMAN	0.395894	1.31576	0.428087		0.00398132	0.00450461	0.00404426	0.00559838	0.00297596	0.00791235	1	1	36.44
P12955-3	Isoform 3 of Xaa-Pro dipeptidase	PEPD	PEPD_HUMAN	0.395697	1.31558	0.00087257	√	1.99748	2.12105	1.83372	2.49878	2.60924	2.72263	9	8	412.84
O15400-2	Isoform 2 of Syntaxin-7	STX7	STX7_HUMAN	0.3955	1.3154	0.0500556		3.14453	2.95957	3.50567	4.74856	4.35723	3.5349	7	7	365.05
P46199	Translation initiation factor IF-2, mitochondrial	MTIF2	IF2M_HUMAN	0.39527	1.31519	0.345233		0.0395354	0.0455339	0.0422498	0.0365302	0.0828958	0.0480228	1	1	39.66
Q9NZ63	Uncharacterized protein C9orf78	C9orf78	CI078_HUMAN	0.395087	1.31502	0.112924		0.245029	0.208429	0.282449	0.382829	0.325531	0.259374	1	1	48.42
Q9H019-3	Isoform 3 of Mitochondrial fission regulator 1-like	MTFR1L	MFR1L_HUMAN	0.393986	1.31402	0.0211437		0.0308415	0.0319808	0.0363926	0.0484067	0.0389942	0.0429692	2	2	94.12
O94760	N(G),N(G)-dimethylarginine dimethylaminohydrolase 1	DDAH1	DDAH1_HUMAN	0.392443	1.31261	0.000958534	√	3.63949	3.72336	3.84732	5.10185	4.6356	4.97717	9	9	394.33
Q9Y314	Nitric oxide synthase-interacting protein	NOSIP	NOSIP_HUMAN	0.392336	1.31252	0.118531		0.187862	0.241026	0.190271	0.219583	0.343832	0.249242	2	2	60.18
P48506	Glutamate--cysteine ligase catalytic subunit	GCLC	GSH1_HUMAN	0.392252	1.31244	0.00417425	√	2.27864	2.13869	1.93758	2.77129	2.56621	3.00295	14	14	473.84
P42892-3	Isoform C of Endothelin-converting enzyme 1	ECE1	ECE1_HUMAN	0.390996	1.3113	0.000355836	√	1.59447	1.5179	1.59452	2.08471	2.03278	2.05465	8	8	378.45
O75688	Protein phosphatase 1B	PPM1B	PPM1B_HUMAN	0.390043	1.31043	0.0433046		0.0505206	0.0672993	0.0471336	0.0759214	0.0642411	0.0759981	3	1	121.96
Q4V328-3	Isoform 3 of GRIP1-associated protein 1	GRIPAP1	GRAP1_HUMAN	0.389107	1.30958	0.0674814		0.0891842	0.122871	0.101738	0.137195	0.113579	0.160164	2	2	136.46
Q9BTY2	Plasma alpha-L-fucosidase	FUCA2	FUCO2_HUMAN	0.389095	1.30957	0.00236691	√	0.514583	0.57658	0.545285	0.687591	0.676953	0.7785	4	4	167.88
P45983-2	Isoform 1 of Mitogen-activated protein kinase 8	MAPK8	MK08_HUMAN	0.388404	1.30894	0.0152035		0.106287	0.119052	0.100237	0.15591	0.142433	0.127817	3	1	116.85
O14734	Acyl-coenzyme A thioesterase 8	ACOT8	ACOT8_HUMAN	0.388079	1.30865	0.0101922		0.362265	0.37735	0.334298	0.407028	0.491362	0.506987	1	1	73.26
Q16222-2	Isoform AGX1 of UDP-N-acetylhexosamine pyrophosphorylase	UAP1	UAP1_HUMAN	0.387958	1.30854	0.0295294		0.497722	0.536703	0.474514	0.597787	0.582802	0.793917	5	4	259.91
Q07889	Son of sevenless homolog 1	SOS1	SOS1_HUMAN	0.387451	1.30808	0.166958		0.0538745	0.048921	0.0282106	0.0596053	0.0484528	0.0633085	1	1	70.12
Q8NBL1	Protein O-glucosyltransferase 1	POGLUT1	PGLT1_HUMAN	0.387034	1.3077	0.395183		0.131135	0.125361	0.223161	0.132039	0.1881	0.30711	3	3	95.37
Q9H1Y0	Autophagy protein 5	ATG5	ATG5_HUMAN	0.386992	1.30766	0.00668947	√	0.360973	0.3961	0.401361	0.547746	0.488031	0.479067	3	3	153.98
Q9BQE5	Apolipoprotein L2	APOL2	APOL2_HUMAN	0.386598	1.30731	0.0124713		0.0975927	0.111522	0.113974	0.154024	0.130655	0.137697	2	2	98.68
Q00535	Cyclin-dependent kinase 5	CDK5	CDK5_HUMAN	0.386415	1.30714	0.216297		0.118966	0.165649	0.129182	0.123739	0.225892	0.191261	5	3	187.65
P42785	Lysosomal Pro-X carboxypeptidase	PRCP	PCP_HUMAN	0.386371	1.3071	0.0101685		0.530015	0.512053	0.504743	0.694146	0.581925	0.745767	2	2	85.97
Q8NEC7	Glutathione S-transferase C-terminal domain-containing protein	GSTCD	GSTCD_HUMAN	0.386295	1.30703	0.000609575		0.0225455	0.0232029	0.0229296	0.031202	0.0296249	0.0289373	2	2	85.6
Q8N4Q1	Mitochondrial intermembrane space import and assembly protein 40	CHCHD4	MIA40_HUMAN	0.386205	1.30695	0.37425		0.444913	0.390545	0.549341	0.626816	0.819225	0.363823	3	3	106.79
O60610-2	Isoform 2 of Protein diaphanous homolog 1	DIAPH1	DIAP1_HUMAN	0.385922	1.30669	0.000404617	√	1.95895	1.91347	1.85102	2.35252	2.47533	2.65094	13	12	601.88
Q9NY33	Dipeptidyl peptidase 3	DPP3	DPP3_HUMAN	0.384937	1.3058	0.00156194	√	7.06571	7.33102	6.42816	8.66323	9.49835	9.0316	18	17	1009.91
O43464	Serine protease HTRA2, mitochondrial	HTRA2	HTRA2_HUMAN	0.384881	1.30575	0.0012605	√	1.03049	1.06243	0.939686	1.25942	1.37935	1.32107	5	5	264.23
Q13637	Ras-related protein Rab-32	RAB32	RAB32_HUMAN	0.38394	1.3049	0.00027537	√	1.53242	1.54009	1.39935	1.96381	1.94653	1.92498	7	7	293.57
Q9UJC5	SH3 domain-binding glutamic acid-rich-like protein 2	SH3BGRL2	SH3L2_HUMAN	0.383578	1.30457	0.223798		0.0216499	0.036453	0.0252037	0.0283861	0.0477084	0.0325851	1	1	36.75
P17174	Aspartate aminotransferase, cytoplasmic	GOT1	AATC_HUMAN	0.383374	1.30439	0.00332015	√	47.6378	52.0623	46.6863	60.3505	60.0244	70.5699	25	23	1209.49
P00742	Coagulation factor X	F10	FA10_HUMAN	0.382463	1.30357	0.0299827		0.319445	0.361691	0.384369	0.446945	0.522145	0.419865	3	3	168.62
O76062	Delta(14)-sterol reductase	TM7SF2	ERG24_HUMAN	0.382447	1.30355	0.0190165		0.542509	0.663675	0.637269	0.716716	0.799319	0.887	4	4	232.24
Q96DE0	U8 snoRNA-decapping enzyme	NUDT16	NUD16_HUMAN	0.381441	1.30264	0.040866		0.0783076	0.09498	0.081391	0.11406	0.123377	0.0943178	1	1	36.3
P09417	Dihydropteridine reductase	QDPR	DHPR_HUMAN	0.381413	1.30262	0.0152935		3.50081	3.39798	3.05669	3.71819	4.53013	4.71985	8	8	369.55
Q15126	Phosphomevalonate kinase	PMVK	PMVK_HUMAN	0.381203	1.30243	0.00177292		0.147246	0.13421	0.136872	0.187521	0.16968	0.187642	2	2	68.81
Q16576	Histone-binding protein RBBP7	RBBP7	RBBP7_HUMAN	0.381153	1.30238	0.0895192		1.70085	2.09372	1.86764	1.96606	2.99097	2.41733	9	5	384.63
P02760	Protein AMBP	AMBP	AMBP_HUMAN	0.38039	1.30169	0.00357428	√	3.79658	4.24586	4.23425	5.5892	5.23741	5.15389	9	9	466.36
O43852-2	Isoform 2 of Calumenin	CALU	CALU_HUMAN	0.379968	1.30131	0.140631		0.780157	0.694749	0.909221	1.03655	1.2591	0.806842	20	2	1092.78
P51580	Thiopurine S-methyltransferase	TPMT	TPMT_HUMAN	0.37994	1.30129	0.0494599		0.443434	0.500973	0.456147	0.603069	0.493286	0.726168	6	6	246
O95757	Heat shock 70 kDa protein 4L	HSPA4L	HS74L_HUMAN	0.37939	1.30079	0.0116079		1.83034	1.7455	1.8	2.4573	2.00981	2.52573	13	11	508.32
P52434	DNA-directed RNA polymerases I, II, and III subunit RPABC3	POLR2H	RPAB3_HUMAN	0.379185	1.30061	0.0907313		0.539929	0.470405	0.456816	0.547658	0.795894	0.564633	4	4	135.56
P30740	Leukocyte elastase inhibitor	SERPINB1	ILEU_HUMAN	0.379065	1.3005	0.0103941		4.38802	4.72239	3.71814	5.4463	5.21044	6.02676	12	11	706.49
O00264	Membrane-associated progesterone receptor component 1	PGRMC1	PGRC1_HUMAN	0.378562	1.30005	0.161031		12.9611	12.621	14.8814	16.4493	22.5996	13.5555	9	8	389.34
Q96GD0	Pyridoxal phosphate phosphatase	PDXP	PLPP_HUMAN	0.377259	1.29887	1.37125e-05	√	0.614935	0.615825	0.595651	0.799811	0.766483	0.805981	5	4	211.54
Q6IBS0	Twinfilin-2	TWF2	TWF2_HUMAN	0.377209	1.29883	0.00928642	√	4.77928	5.12958	4.38978	5.49493	6.60253	6.47399	11	10	644.14
Q10567-2	Isoform B of AP-1 complex subunit beta-1	AP1B1	AP1B1_HUMAN	0.376626	1.2983	0.00418613	√	2.83249	2.57774	2.4666	3.23541	3.62686	3.36424	20	6	1095.57
O43708	Maleylacetoacetate isomerase	GSTZ1	MAAI_HUMAN	0.375064	1.2969	0.00866483		0.620873	0.714678	0.695418	0.794599	0.926513	0.912845	2	2	54.87
P52895	Aldo-keto reductase family 1 member C2	AKR1C2	AK1C2_HUMAN	0.373793	1.29576	0.0159685		0.45451	0.480495	0.456757	0.534549	0.68283	0.586003	18	2	848.11
Q9BTZ2-8	Isoform 8 of Dehydrogenase/reductase SDR family member 4	DHRS4	DHRS4_HUMAN	0.373416	1.29542	0.0032108		0.0929481	0.0860236	0.0780465	0.112902	0.105191	0.114852	2	2	88.51
P62745	Rho-related GTP-binding protein RhoB	RHOB	RHOB_HUMAN	0.373208	1.29523	0.00509286		0.298151	0.354594	0.305905	0.412548	0.387985	0.44114	2	1	140.93
O00468-6	Isoform 6 of Agrin	AGRN	AGRIN_HUMAN	0.370633	1.29292	0.00126472	√	2.80868	2.85782	2.90107	3.90689	3.53355	3.63673	21	19	820.41
Q9NVH2-3	Isoform 3 of Integrator complex subunit 7	INTS7	INT7_HUMAN	0.369909	1.29227	0.148981		0.0704756	0.0747693	0.0866808	0.0728453	0.115755	0.11111	3	3	150.86
P12235	ADP/ATP translocase 1	SLC25A4	ADT1_HUMAN	0.3677	1.29029	0.00611976	√	1.90926	1.89503	1.70985	2.39714	2.12287	2.59484	15	3	692.87
Q96Q42-2	Isoform 2 of Alsin	ALS2	ALS2_HUMAN	0.366642	1.28935	0.00730426		0.0268282	0.0244612	0.0212843	0.0314563	0.0307449	0.0313717	1	1	45.61
Q9UM54-6	Isoform 6 of Unconventional myosin-VI	MYO6	MYO6_HUMAN	0.366578	1.28929	0.000761709	√	0.684277	0.68997	0.623614	0.848933	0.885594	0.841297	7	7	310.41
A6NE01	Protein FAM186A	FAM186A	F186A_HUMAN	0.364104	1.28708	0.188919		0.00888571	0.00471382	0.00613117	0.00929744	0.00699472	0.00910286	1	1	16.74
Q99536	Synaptic vesicle membrane protein VAT-1 homolog	VAT1	VAT1_HUMAN	0.363497	1.28654	0.0105086		7.76879	8.532	7.54974	8.97428	10.7501	10.9603	15	14	655.44
Q14697	Neutral alpha-glucosidase AB	GANAB	GANAB_HUMAN	0.362549	1.2857	0.162528		0.866244	0.921491	0.700096	0.867016	1.38813	0.943441	47	2	2301.74
O14569	Cytochrome b561 domain-containing protein 2	CYB561D2	C56D2_HUMAN	0.362466	1.28562	0.00571509		0.0430535	0.0441983	0.0364246	0.0525563	0.0501711	0.0562736	1	1	59.76
O14929	Histone acetyltransferase type B catalytic subunit	HAT1	HAT1_HUMAN	0.360618	1.28398	0.00523037	√	10.4257	10.6455	9.25745	11.9606	13.812	13.1687	13	13	795.88
Q6PJG6	BRCA1-associated ATM activator 1	BRAT1	BRAT1_HUMAN	0.358963	1.2825	0.168963		0.109871	0.0968424	0.0626079	0.12828	0.0935865	0.12354	4	4	153.9
P49023-2	Isoform Alpha of Paxillin	PXN	PAXI_HUMAN	0.358227	1.28185	0.0118004		0.0792114	0.0720459	0.0626126	0.0960918	0.086802	0.0912552	3	2	113.12
P35249	Replication factor C subunit 4	RFC4	RFC4_HUMAN	0.3578	1.28147	0.0150916		3.66286	3.67034	4.15531	4.60542	5.35806	4.7587	9	9	371.44
Q9Y646	Carboxypeptidase Q	CPQ	CBPQ_HUMAN	0.357499	1.2812	0.12647		0.0510037	0.0426865	0.0448632	0.0674161	0.0439633	0.0661356	2	2	120.98
Q9Y2X7;Q14161-2	ARF GTPase-activating protein GIT1	GIT1	GIT1_HUMAN	0.356675	1.28047	0.0620064		0.0729988	0.0593537	0.0513086	0.0881689	0.074073	0.0729308	5	3	144.7
P46821	Microtubule-associated protein 1B	MAP1B	MAP1B_HUMAN	0.356445	1.28027	0.088301		0.0642369	0.0568467	0.0527417	0.0883327	0.0590835	0.0751266	2	2	111.07
Q9HAB8-2	Isoform 2 of Phosphopantothenate--cysteine ligase	PPCS	PPCS_HUMAN	0.356402	1.28023	0.0535108		0.0476154	0.0507253	0.0361982	0.0568456	0.0508482	0.0645469	1	1	16.3
P34949-2	Isoform 2 of Mannose-6-phosphate isomerase	MPI	MPI_HUMAN	0.355672	1.27958	0.112914		0.657729	0.954504	0.800169	0.824342	1.10313	1.15939	6	6	237.05
P25685	DnaJ homolog subfamily B member 1	DNAJB1	DNJB1_HUMAN	0.355505	1.27943	0.00857929	√	10.2348	9.46342	9.74478	13.7323	12.2157	11.7224	16	15	721.86
Q9BV79	Trans-2-enoyl-CoA reductase, mitochondrial	MECR	MECR_HUMAN	0.355351	1.2793	0.570149		0.0334388	0.00470595	0.0203625	0.0365452	0.0281031	0.0101999	1	1	43.02
Q15785	Mitochondrial import receptor subunit TOM34	TOMM34	TOM34_HUMAN	0.354223	1.2783	0.00279372	√	10.6674	10.9045	11.599	14.6544	14.0868	13.6611	13	13	661.5
Q9NVZ3-3	Isoform 3 of Adaptin ear-binding coat-associated protein 2	NECAP2	NECP2_HUMAN	0.354032	1.27813	0.203558		0.324284	0.434748	0.464141	0.46727	0.409853	0.686249	2	2	57
A6NH11	Glycolipid transfer protein domain-containing protein 2	GLTPD2	GLTD2_HUMAN	0.35266	1.27691	0.0682904		0.185521	0.179711	0.18463	0.286486	0.203248	0.212392	3	3	97.45
P61769	Beta-2-microglobulin	B2M	B2MG_HUMAN	0.352075	1.2764	0.257543		0.826073	0.696185	1.17834	1.40335	1.1819	0.861779	2	2	104.85
O95479	GDH/6PGL endoplasmic bifunctional protein	H6PD	G6PE_HUMAN	0.351425	1.27582	0.00231304	√	1.91418	2.09422	1.75019	2.45144	2.37408	2.52141	10	10	506.84
P51798-2	Isoform 2 of H(+)/Cl(-) exchange transporter 7	CLCN7	CLCN7_HUMAN	0.351358	1.27576	0.0356775		0.00983523	0.0081833	0.00893597	0.0130804	0.0104325	0.0108746	1	1	27.21
Q9NX14	NADH dehydrogenase [ubiquinone] 1 beta subcomplex subunit 11, mitochondrial	NDUFB11	NDUBB_HUMAN	0.350015	1.27457	0.304772		2.69368	2.80263	3.158	2.77975	5.24883	3.00198	3	3	95.78
P02794	Ferritin heavy chain	FTH1	FRIH_HUMAN	0.349748	1.27434	0.103922		0.884964	0.974214	1.15943	1.54408	1.18024	1.12241	8	8	348.02
Q03426	Mevalonate kinase	MVK	KIME_HUMAN	0.347558	1.27241	0.0172378		3.17439	3.08963	2.81275	3.49942	4.33066	3.71924	8	8	472.12
P10109	Adrenodoxin, mitochondrial	FDX1	ADX_HUMAN	0.346348	1.27134	0.158917		0.422727	0.423015	0.461779	0.512711	0.710568	0.439022	3	2	136.71
Q8NCW5-2	Isoform 2 of NAD(P)H-hydrate epimerase	APOA1BP	NNRE_HUMAN	0.345916	1.27096	0.00607191	√	6.29043	6.70087	7.08656	8.65769	8.76748	8.09294	8	8	276.99
Q9Y276	Mitochondrial chaperone BCS1	BCS1L	BCS1_HUMAN	0.345339	1.27045	0.0346368		0.705124	0.659719	0.597475	0.723396	0.948539	0.821091	6	6	344.58
Q9GZM5	Protein YIPF3	YIPF3	YIPF3_HUMAN	0.345186	1.27031	0.515393		0.537818	0.655974	0.54341	0.473686	1.17821	0.554896	4	4	166.11
Q9BXS9-2	Isoform 2 of Solute carrier family 26 member 6	SLC26A6	S26A6_HUMAN	0.345039	1.27019	0.047788		0.342301	0.382551	0.294389	0.384596	0.401732	0.508296	2	2	97.12
P01344	Insulin-like growth factor II	IGF2	IGF2_HUMAN	0.344231	1.26947	0.132475		1.46783	1.33716	1.9192	2.19929	2.1341	1.66386	3	3	132.5
Q9Y2G5-2	Isoform B of GDP-fucose protein O-fucosyltransferase 2	POFUT2	OFUT2_HUMAN	0.34412	1.26938	0.040168		0.0220609	0.0228917	0.0175113	0.023977	0.0250529	0.0302603	1	1	56.06
P42025	Beta-centractin	ACTR1B	ACTY_HUMAN	0.342706	1.26813	0.0517849		0.709627	0.75842	0.567243	0.763259	0.968628	0.849131	9	2	449.97
P32119	Peroxiredoxin-2	PRDX2	PRDX2_HUMAN	0.341687	1.26724	0.0230649		20.2984	20.8335	19.0489	23.6739	29.1027	23.4867	10	9	489.63
O43156	TELO2-interacting protein 1 homolog	TTI1	TTI1_HUMAN	0.340104	1.26585	0.0396729		0.268861	0.2139	0.226522	0.26559	0.329637	0.302619	5	5	174.24
O00629	Importin subunit alpha-3	KPNA4	IMA3_HUMAN	0.340072	1.26582	0.190644		0.673177	0.764467	0.761954	0.685341	1.18619	0.912762	8	6	367.21
Q8NB37-3	Isoform 3 of Parkinson disease 7 domain-containing protein 1	PDDC1	PDDC1_HUMAN	0.339564	1.26537	0.171389		0.0763156	0.0792232	0.0633768	0.0912845	0.068407	0.117319	1	1	72.9
P51151	Ras-related protein Rab-9A	RAB9A	RAB9A_HUMAN	0.339537	1.26535	0.0622391		0.0861837	0.0704447	0.0625395	0.104672	0.0852097	0.0874425	1	1	34.01
P61981	14-3-3 protein gamma	YWHAG	1433G_HUMAN	0.339339	1.26518	0.0376547		9.37328	8.44763	7.81352	10.2765	12.3619	9.79372	11	6	540.87
P30519	Heme oxygenase 2	HMOX2	HMOX2_HUMAN	0.338814	1.26472	0.0157757		2.43107	2.67975	2.85083	3.49922	3.02004	3.54998	8	8	301.94
Q13526	Peptidyl-prolyl cis-trans isomerase NIMA-interacting 1	PIN1	PIN1_HUMAN	0.338701	1.26462	0.0812519		1.59019	1.41403	1.81316	2.20367	2.16578	1.72269	7	7	343.5
P52209	6-phosphogluconate dehydrogenase, decarboxylating	PGD	6PGD_HUMAN	0.337284	1.26338	0.00130948	√	70.1303	73.1075	64.5098	85.4585	83.7152	93.2896	26	25	1351.78
Q8WYA6	Beta-catenin-like protein 1	CTNNBL1	CTBL1_HUMAN	0.335095	1.26146	0.159568		1.95053	2.04079	1.85814	2.03341	3.20686	2.13859	11	11	441.6
P31431-2	Isoform 2 of Syndecan-4	SDC4	SDC4_HUMAN	0.334995	1.26137	0.199072		1.30735	1.0939	1.71605	1.95879	1.86015	1.37451	4	4	260.57
O75131	Copine-3	CPNE3	CPNE3_HUMAN	0.334312	1.26078	0.0157945		5.41648	5.78689	5.07593	6.06484	6.70629	7.75343	12	12	594.42
P11182	Lipoamide acyltransferase component of branched-chain alpha-keto acid dehydrogenase complex, mitochondrial	DBT	ODB2_HUMAN	0.334031	1.26053	0.216712		0.187869	0.312076	0.235221	0.232504	0.35382	0.340376	5	5	141.44
O94822	E3 ubiquitin-protein ligase listerin	LTN1	LTN1_HUMAN	0.333933	1.26044	0.386389		0.101417	0.0631971	0.0946567	0.0900642	0.156374	0.0803584	2	2	163.26
Q9NXV6	CDKN2A-interacting protein	CDKN2AIP	CARF_HUMAN	0.333074	1.25969	0.0272858		0.206515	0.18415	0.167795	0.261858	0.216634	0.224997	4	4	253.84
O75607	Nucleoplasmin-3	NPM3	NPM3_HUMAN	0.332864	1.25951	0.555457		0.0388394	0.039395	0.0544003	0.0362165	0.0902674	0.040571	1	1	30.61
O75832	26S proteasome non-ATPase regulatory subunit 10	PSMD10	PSD10_HUMAN	0.332565	1.25925	0.259491		0.784255	0.821939	0.704786	0.766352	1.341	0.802745	7	7	336.25
O75347	Tubulin-specific chaperone A	TBCA	TBCA_HUMAN	0.332421	1.25912	0.250295		9.77089	7.69484	10.9631	12.3306	14.7097	8.75504	13	11	609.57
Q00403	Transcription initiation factor IIB	GTF2B	TF2B_HUMAN	0.332228	1.25896	0.0199837		0.567282	0.520992	0.51312	0.697282	0.720572	0.59823	6	4	191.92
Q9UHD9	Ubiquilin-2	UBQLN2	UBQL2_HUMAN	0.332091	1.25884	0.198634		0.0631151	0.0438406	0.0680285	0.0852377	0.075531	0.0595076	7	1	332.77
Q9NXR1-2	Isoform 2 of Nuclear distribution protein nudE homolog 1	NDE1	NDE1_HUMAN	0.331217	1.25807	0.169461		0.139451	0.0911076	0.12701	0.151163	0.173042	0.125642	1	1	73.46
P42858	Huntingtin	HTT	HD_HUMAN	0.330857	1.25776	0.0591864		0.116394	0.105467	0.101088	0.150803	0.109935	0.145453	3	3	175.55
P82909	28S ribosomal protein S36, mitochondrial	MRPS36	RT36_HUMAN	0.330619	1.25755	0.267747		0.79294	0.657657	0.9937	1.17199	1.16512	0.736721	3	3	91.79
Q9H3U1-2	Isoform 2 of Protein unc-45 homolog A	UNC45A	UN45A_HUMAN	0.330331	1.2573	1.50891e-05	√	1.18299	1.21249	1.1634	1.4492	1.49788	1.52753	9	9	425.19
Q96BW5-2	Isoform 2 of Phosphotriesterase-related protein	PTER	PTER_HUMAN	0.33003	1.25704	0.00986565	√	0.162087	0.173	0.139176	0.195312	0.18798	0.212876	4	4	116.18
Q9BW60	Elongation of very long chain fatty acids protein 1	ELOVL1	ELOV1_HUMAN	0.328665	1.25585	0.0227476		0.066143	0.0595494	0.0621439	0.0869217	0.0687463	0.0802262	3	2	129.81
Q86V48	Leucine zipper protein 1	LUZP1	LUZP1_HUMAN	0.328123	1.25538	0.00865342	√	0.939706	0.840367	0.899936	1.2022	1.03932	1.12291	10	10	442.9
O15031	Plexin-B2	PLXNB2	PLXB2_HUMAN	0.32736	1.25472	0.297928		1.3517	0.849495	0.772529	1.60033	1.19538	0.935475	8	8	319.09
Q4KMQ2-3	Isoform 3 of Anoctamin-6	ANO6	ANO6_HUMAN	0.3272	1.25458	0.492029		1.43497	0.533814	0.519099	1.46696	1.06662	0.587664	6	5	199.54
Q12768	WASH complex subunit strumpellin	KIAA0196	STRUM_HUMAN	0.325525	1.25312	0.240201		0.0383828	0.0355966	0.0240499	0.0410016	0.0305094	0.0513315	3	2	128.44
Q96G03	Phosphoglucomutase-2	PGM2	PGM2_HUMAN	0.325163	1.25281	0.0893741		0.528915	0.734015	0.579591	0.642909	0.809394	0.856017	8	5	352.95
Q9BSJ8	Extended synaptotagmin-1	ESYT1	ESYT1_HUMAN	0.324699	1.2524	0.000262673	√	11.8271	11.9712	11.6514	14.0705	14.7054	15.6214	21	21	1116.7
Q9Y296	Trafficking protein particle complex subunit 4	TRAPPC4	TPPC4_HUMAN	0.32441	1.25215	0.0788764		0.298308	0.269399	0.217335	0.35929	0.275344	0.348358	2	2	34.99
P21980	Protein-glutamine gamma-glutamyltransferase 2	TGM2	TGM2_HUMAN	0.3239	1.25171	0.000527822	√	1.02814	1.05096	0.94823	1.2112	1.27695	1.30119	8	8	290.96
Q8N668	COMM domain-containing protein 1	COMMD1	COMD1_HUMAN	0.323753	1.25158	0.13065		0.158396	0.200337	0.255416	0.255134	0.273907	0.239618	2	2	94.83
O43808	Peroxisomal membrane protein PMP34	SLC25A17	PM34_HUMAN	0.322659	1.25063	0.172839		0.122897	0.10199	0.113668	0.12188	0.181635	0.119893	2	1	43.6
Q8TCZ2-6	Isoform 6 of CD99 antigen-like protein 2	CD99L2	C99L2_HUMAN	0.322227	1.25026	0.28085		0.0940174	0.0727015	0.104215	0.125616	0.133094	0.0800278	2	1	53.2
Q8WUD1	Ras-related protein Rab-2B	RAB2B	RAB2B_HUMAN	0.3216	1.24972	0.0714885		0.0713693	0.0738166	0.0608214	0.0708893	0.0988108	0.0877504	10	1	454.14
Q9BT09	Protein canopy homolog 3	CNPY3	CNPY3_HUMAN	0.321369	1.24952	0.297084		3.11917	2.91706	4.19753	4.15541	5.52452	3.10731	8	7	359.65
P30533	Alpha-2-macroglobulin receptor-associated protein	LRPAP1	AMRP_HUMAN	0.321239	1.2494	0.185178		4.42534	3.64531	5.24817	6.38053	5.86314	4.39692	14	14	584.1
P49459	Ubiquitin-conjugating enzyme E2 A	UBE2A	UBE2A_HUMAN	0.32118	1.24935	0.22654		0.0886715	0.0682179	0.110551	0.0931925	0.099965	0.14097	1	1	54.73
P35914	Hydroxymethylglutaryl-CoA lyase, mitochondrial	HMGCL	HMGCL_HUMAN	0.321014	1.24921	0.000344957	√	7.37832	7.73027	7.34567	8.90602	9.26904	9.87499	11	11	659.64
Q9BZF9-2	Isoform 2 of Uveal autoantigen with coiled-coil domains and ankyrin repeats	UACA	UACA_HUMAN	0.320869	1.24908	0.342865		0.0212194	0.0103693	0.00547215	0.0147776	0.0144159	0.0170986	1	1	43.99
Q15691	Microtubule-associated protein RP/EB family member 1	MAPRE1	MARE1_HUMAN	0.319317	1.24774	0.0426467		7.66061	7.30296	7.28313	8.83995	10.7215	8.19665	11	9	409.01
Q96BQ5	Coiled-coil domain-containing protein 127	CCDC127	CC127_HUMAN	0.318989	1.24746	0.0546107		0.119888	0.131064	0.150128	0.175433	0.17696	0.147938	2	2	107.36
Q3SXM5	Inactive hydroxysteroid dehydrogenase-like protein 1	HSDL1	HSDL1_HUMAN	0.318823	1.24731	0.000662741	√	0.811018	0.813512	0.742612	1.01084	0.942742	0.998982	6	6	257.04
Q9Y2V2	Calcium-regulated heat stable protein 1	CARHSP1	CHSP1_HUMAN	0.317674	1.24632	0.0649841		3.49413	3.25901	3.90353	5.15228	4.02228	4.10707	4	4	192.83
Q8WVC0	RNA polymerase-associated protein LEO1	LEO1	LEO1_HUMAN	0.317312	1.24601	0.480015		0.489147	0.453149	0.526354	0.550027	0.901078	0.378842	5	4	157.63
Q9HAN9	Nicotinamide mononucleotide adenylyltransferase 1	NMNAT1	NMNA1_HUMAN	0.316663	1.24545	0.00202922	√	0.909425	0.965087	0.91315	1.22017	1.07954	1.17217	4	4	164.16
Q15435	Protein phosphatase 1 regulatory subunit 7	PPP1R7	PP1R7_HUMAN	0.315913	1.2448	0.00114903	√	3.60804	3.5386	3.53596	4.53224	4.12381	4.64165	11	11	663.55
Q8TAG9	Exocyst complex component 6	EXOC6	EXOC6_HUMAN	0.315556	1.24449	0.611526		0.0101027	0.0147414	0.00831161	0.00703022	0.0126838	0.021548	1	1	17.84
P99999	Cytochrome c	CYCS	CYC_HUMAN	0.314951	1.24397	0.0872679		5.66161	4.91222	6.22672	8.02721	6.74634	6.12583	7	7	303.43
Q07864	DNA polymerase epsilon catalytic subunit A	POLE	DPOE1_HUMAN	0.31475	1.2438	0.00257084		0.459801	0.416915	0.400731	0.538291	0.521752	0.528841	1	1	38.9
Q9UJY4	ADP-ribosylation factor-binding protein GGA2	GGA2	GGA2_HUMAN	0.312841	1.24215	0.0309395		0.295071	0.280627	0.270932	0.394015	0.301459	0.356168	2	2	71.24
Q9UKR5	Probable ergosterol biosynthetic protein 28	C14orf1	ERG28_HUMAN	0.31207	1.24149	0.00317844	√	1.49359	1.45015	1.26901	1.73489	1.69897	1.79623	5	4	198.3
C9JLW8	Protein FAM195B	FAM195B	F195B_HUMAN	0.311577	1.24106	0.48487		0.202164	0.165393	0.380592	0.452641	0.272782	0.203078	3	3	88.83
Q8N2U0	Transmembrane protein 256	TMEM256	TM256_HUMAN	0.310966	1.24054	0.00707884		0.98862	1.13129	1.09053	1.32103	1.38507	1.27658	1	1	57.05
P00568	Adenylate kinase isoenzyme 1	AK1	KAD1_HUMAN	0.310928	1.24051	0.0905375		1.05082	1.0194	1.45469	1.44901	1.4675	1.45617	4	4	207.76
Q53EU6	Glycerol-3-phosphate acyltransferase 3	AGPAT9	GPAT3_HUMAN	0.310892	1.24047	0.133714		0.0218105	0.0149689	0.0130602	0.0211848	0.0191631	0.0214768	1	1	24.31
O15498	Synaptobrevin homolog YKT6	YKT6	YKT6_HUMAN	0.310538	1.24017	0.0165544		0.547422	0.553589	0.478517	0.71859	0.598204	0.64209	4	4	123.66
P23528	Cofilin-1	CFL1	COF1_HUMAN	0.310335	1.24	0.0211489		59.4052	52.1373	57.1908	76.2357	68.0106	64.9823	14	11	742.27
Q8IWA4	Mitofusin-1	MFN1	MFN1_HUMAN	0.310205	1.23988	0.0233249		0.04954	0.0396581	0.041322	0.0561202	0.0533123	0.0523972	2	1	79.2
Q8N5A5-2	Isoform 2 of Zinc finger CCCH-type with G patch domain-containing protein	ZGPAT	ZGPAT_HUMAN	0.310151	1.23984	0.0180971		0.194791	0.210807	0.168585	0.255153	0.225675	0.231064	2	2	121.79
P61962	DDB1- and CUL4-associated factor 7	DCAF7	DCAF7_HUMAN	0.30987	1.2396	0.417202		0.377969	0.364028	0.379481	0.689134	0.350975	0.350071	2	2	123.82
Q2M389	WASH complex subunit 7	KIAA1033	WASH7_HUMAN	0.309656	1.23941	0.146119		0.0187178	0.0129737	0.0164259	0.0167631	0.0231401	0.0197341	2	2	60.85
Q5SNT2-2	Isoform SAMP1 of Transmembrane protein 201	TMEM201	TM201_HUMAN	0.308789	1.23867	0.00290589	√	0.191735	0.203951	0.17602	0.23671	0.222406	0.249036	4	4	130.36
O75663	TIP41-like protein	TIPRL	TIPRL_HUMAN	0.3082	1.23816	0.225708		0.0849076	0.0817985	0.0769893	0.0988367	0.0723675	0.13053	3	3	122.16
Q6AI08	HEAT repeat-containing protein 6	HEATR6	HEAT6_HUMAN	0.30783	1.23784	0.105424		0.0166245	0.0177029	0.0130644	0.023182	0.0178914	0.0175902	2	1	97.41
Q9UBM7	7-dehydrocholesterol reductase	DHCR7	DHCR7_HUMAN	0.307478	1.23754	0.000880259	√	13.0896	13.6054	12.5477	15.2243	16.5235	16.8167	6	6	293.54
Q5W0B1	RING finger protein 219	RNF219	RN219_HUMAN	0.307099	1.23722	0.381042		0.018824	0.0420702	0.0291522	0.0403929	0.0253099	0.0457041	1	1	20.15
Q96G28	Coiled-coil domain-containing protein 104	CCDC104	CC104_HUMAN	0.306733	1.2369	0.141844		0.0345681	0.0339881	0.047731	0.0506076	0.0400326	0.0531958	1	1	10.11
Q96EP0	E3 ubiquitin-protein ligase RNF31	RNF31	RNF31_HUMAN	0.304601	1.23508	0.304513		0.0191353	0.00776671	0.0094174	0.0129384	0.0154086	0.0165104	1	1	29.62
Q14344	Guanine nucleotide-binding protein subunit alpha-13	GNA13	GNA13_HUMAN	0.303419	1.23407	0.106386		1.46339	1.12847	0.949937	1.51733	1.51675	1.33672	6	6	170.49
Q8N0X4-2	Isoform 2 of Citrate lyase subunit beta-like protein, mitochondrial	CLYBL	CLYBL_HUMAN	0.302419	1.23321	0.0419856		0.345565	0.431913	0.313243	0.424751	0.467498	0.45284	6	4	261.13
O00267-2	Isoform 2 of Transcription elongation factor SPT5	SUPT5H	SPT5H_HUMAN	0.302403	1.2332	0.0125729		0.831124	0.842338	0.696485	0.908684	1.01001	1.00391	9	9	480.53
Q13190-2	Isoform 2 of Syntaxin-5	STX5	STX5_HUMAN	0.302051	1.2329	0.00971183	√	0.519189	0.537173	0.47495	0.674565	0.626695	0.586688	4	4	141.63
Q04917	14-3-3 protein eta	YWHAH	1433F_HUMAN	0.301926	1.23279	0.0102158		8.38863	7.91233	7.75381	10.1264	10.4329	9.09516	14	10	684.78
Q9BWD1	Acetyl-CoA acetyltransferase, cytosolic	ACAT2	THIC_HUMAN	0.301552	1.23247	0.0872914		29.1843	30.8259	31.3948	30.8552	44.3485	37.4502	16	16	835.61
Q8NBU5	ATPase family AAA domain-containing protein 1	ATAD1	ATAD1_HUMAN	0.301495	1.23242	0.0557917		1.79396	1.65663	1.55329	1.76231	2.3676	2.03697	7	7	280.18
O43760	Synaptogyrin-2	SYNGR2	SNG2_HUMAN	0.300807	1.23183	0.00433727		0.826188	0.758998	0.735924	0.95434	0.888506	1.01637	3	2	114.46
Q96K49-2	Isoform 2 of Transmembrane protein 87B	TMEM87B	TM87B_HUMAN	0.300559	1.23162	0.0147336		0.220887	0.2658	0.228017	0.312675	0.28193	0.285639	4	4	123.72
Q9Y5R8	Trafficking protein particle complex subunit 1	TRAPPC1	TPPC1_HUMAN	0.30026	1.23137	0.0777827		0.0702075	0.0605547	0.0540339	0.0818085	0.0632576	0.0824856	1	1	23.07
Q9NQZ2	Something about silencing protein 10	UTP3	SAS10_HUMAN	0.299848	1.23101	0.710048		0.661376	0.716597	0.680936	0.519883	1.46094	0.553725	6	6	255.32
O14730-2	Isoform 2 of Serine/threonine-protein kinase RIO3	RIOK3	RIOK3_HUMAN	0.297816	1.22928	0.349281		0.0400759	0.0369886	0.0584144	0.0376802	0.0643266	0.0645349	1	1	24.11
P35610-3	Isoform 3 of Sterol O-acyltransferase 1	SOAT1	SOAT1_HUMAN	0.296836	1.22845	0.0695012		0.353894	0.304527	0.273567	0.333882	0.432221	0.378796	4	3	116.53
A0MZ66-4	Isoform 4 of Shootin-1	KIAA1598	SHOT1_HUMAN	0.296312	1.228	0.00875941	√	0.883801	0.760735	0.800959	1.02828	1.00183	0.972959	10	10	275.41
Q96HR9	Receptor expression-enhancing protein 6	REEP6	REEP6_HUMAN	0.295311	1.22715	0.118506		2.30116	1.78084	2.06671	2.60167	2.83652	2.10721	4	3	189.25
O00754-2	Isoform 2 of Lysosomal alpha-mannosidase	MAN2B1	MA2B1_HUMAN	0.295292	1.22713	0.0546324		0.638496	0.602785	0.733365	0.905469	0.739086	0.7786	4	4	217.14
P08833	Insulin-like growth factor-binding protein 1	IGFBP1	IBP1_HUMAN	0.295052	1.22693	0.282735		3.76864	3.58694	5.10916	6.38216	5.06364	3.84755	3	3	197.98
Q8WY22	BRI3-binding protein	BRI3BP	BRI3B_HUMAN	0.294398	1.22637	0.0134469		0.462741	0.392351	0.377729	0.509538	0.496432	0.50593	1	1	55.43
Q9NVE7	Pantothenate kinase 4	PANK4	PANK4_HUMAN	0.293258	1.2254	0.0764777		0.444268	0.537714	0.438106	0.575948	0.487247	0.676988	5	5	199.92
Q6ZT12	E3 ubiquitin-protein ligase UBR3	UBR3	UBR3_HUMAN	0.292701	1.22493	0.115681		0.0286879	0.030984	0.0335636	0.0451636	0.0309945	0.0380489	1	1	38.57
Q13315	Serine-protein kinase ATM	ATM	ATM_HUMAN	0.292575	1.22482	0.241519		0.0358948	0.0457179	0.0508869	0.0401345	0.0571891	0.064965	1	1	50.44
P56181-2	Isoform 2 of NADH dehydrogenase [ubiquinone] flavoprotein 3, mitochondrial	NDUFV3	NDUV3_HUMAN	0.292462	1.22473	0.272001		2.01622	1.6694	2.57084	2.80327	2.92633	1.93286	11	10	422.47
Q9BVW5	TIMELESS-interacting protein	TIPIN	TIPIN_HUMAN	0.292107	1.22443	0.354249		0.0515144	0.0564918	0.132427	0.108903	0.103088	0.0824014	2	2	70.25
P52306	Rap1 GTPase-GDP dissociation stimulator 1	RAP1GDS1	GDS1_HUMAN	0.292079	1.2244	0.0612052		0.383883	0.354532	0.352204	0.403609	0.523273	0.408475	7	5	342.76
P06454-2	Isoform 2 of Prothymosin alpha	PTMA	PTMA_HUMAN	0.291379	1.22381	0.76007		0.12674	0.121326	0.144149	0.195699	0.217949	0.0663496	1	1	61
A1X283	SH3 and PX domain-containing protein 2B	SH3PXD2B	SPD2B_HUMAN	0.291031	1.22351	0.00500984		0.0286851	0.0291277	0.0245553	0.0334677	0.0327447	0.0345661	1	1	43.37
P61626	Lysozyme C	LYZ	LYSC_HUMAN	0.290621	1.22317	0.198455		9.24301	9.39549	11.7986	11.7012	15.3496	10.1788	6	6	249.21
P21399	Cytoplasmic aconitate hydratase	ACO1	ACOC_HUMAN	0.288264	1.22117	0.00108993	√	7.00689	6.65792	6.39897	7.83829	8.03732	8.62567	13	13	601.93
Q8N1G2	Cap-specific mRNA (nucleoside-2'-O-)-methyltransferase 1	CMTR1	CMTR1_HUMAN	0.288175	1.22109	0.00998035	√	1.0151	1.00392	0.847256	1.10457	1.16779	1.22763	14	14	418.49
Q5R3I4	Tetratricopeptide repeat protein 38	TTC38	TTC38_HUMAN	0.287736	1.22072	0.00315501	√	5.10359	5.5699	5.12783	6.00681	6.37663	6.90559	14	13	728.28
Q13043;Q13188	Serine/threonine-protein kinase 4	STK4	STK4_HUMAN	0.287182	1.22025	0.00321569	√	0.813956	0.894432	0.767694	0.994825	0.965016	1.06161	6	6	257.87
Q9BUL8	Programmed cell death protein 10	PDCD10	PDC10_HUMAN	0.28665	1.2198	0.182058		0.843671	0.912975	0.859076	0.925974	1.36385	0.90084	4	4	181.94
Q9NVH0-2	Isoform 2 of Exonuclease 3'-5' domain-containing protein 2	EXD2	EXD2_HUMAN	0.286358	1.21956	0.13707		0.066472	0.047993	0.0451082	0.062374	0.0732995	0.0589353	1	1	64.23
P52565	Rho GDP-dissociation inhibitor 1	ARHGDIA	GDIR1_HUMAN	0.286296	1.2195	0.0186191		16.8345	16.4073	14.8644	18.1979	21.5974	18.8705	8	8	365.32
Q9GZP9	Derlin-2	DERL2	DERL2_HUMAN	0.285549	1.21887	0.52958		0.410945	0.713787	0.651498	0.45122	1.06999	0.643792	2	2	67.43
Q9NZW5	MAGUK p55 subfamily member 6	MPP6	MPP6_HUMAN	0.284764	1.21821	0.299993		0.0217585	0.0213426	0.0224916	0.0291548	0.0179577	0.0327932	1	1	23.99
Q8WUY1	Protein THEM6	THEM6	THEM6_HUMAN	0.284572	1.21805	0.0137794		1.5244	1.5847	1.35066	1.85608	1.6345	1.94162	8	7	356.56
Q13510	Acid ceramidase	ASAH1	ASAH1_HUMAN	0.283862	1.21745	0.00830025	√	2.58807	2.75329	2.56329	3.10946	2.94478	3.56928	7	7	403.64
Q53GS7	Nucleoporin GLE1	GLE1	GLE1_HUMAN	0.283224	1.21691	0.272407		0.0274761	0.0627673	0.034334	0.0511855	0.0484523	0.0519619	2	2	78.22
O60825-2	Isoform 2 of 6-phosphofructo-2-kinase/fructose-2,6-bisphosphatase 2	PFKFB2	F262_HUMAN	0.282616	1.2164	0.475937		0.351095	0.206652	0.177392	0.393227	0.31487	0.186125	5	3	155.14
Q13813-3	Isoform 3 of Spectrin alpha chain, non-erythrocytic 1	SPTAN1	SPTN1_HUMAN	0.282574	1.21636	0.0157792		0.740663	0.690894	0.800453	0.945007	0.892845	0.877083	119	1	6415.47
P29317	Ephrin type-A receptor 2	EPHA2	EPHA2_HUMAN	0.282414	1.21623	0.0130262		1.229	1.38907	1.11673	1.50012	1.55988	1.48236	9	9	422.48
Q06481-3	Isoform 3 of Amyloid-like protein 2	APLP2	APLP2_HUMAN	0.281911	1.2158	0.0973913		0.586601	0.654536	0.846924	0.832385	0.821839	0.88445	8	8	367.97
Q69YN4-2	Isoform 2 of Protein virilizer homolog	KIAA1429	VIR_HUMAN	0.281635	1.21557	0.124933		0.0440497	0.0450985	0.0380076	0.0566967	0.0564245	0.0414457	3	2	129.22
Q12933-4	Isoform 4 of TNF receptor-associated factor 2	TRAF2	TRAF2_HUMAN	0.281494	1.21545	0.35815		0.0435298	0.0404894	0.0306895	0.0410519	0.0337078	0.0646633	1	1	16.75
P84095	Rho-related GTP-binding protein RhoG	RHOG	RHOG_HUMAN	0.281462	1.21543	0.000615385	√	1.3015	1.34646	1.26464	1.55618	1.51121	1.68808	5	4	214.82
Q16864	V-type proton ATPase subunit F	ATP6V1F	VATF_HUMAN	0.281159	1.21517	0.340557		0.297549	0.217898	0.434654	0.464932	0.384935	0.304667	1	1	60.64
Q96A26	Protein FAM162A	FAM162A	F162A_HUMAN	0.280884	1.21494	0.229324		10.9629	9.97203	12.7896	15.6565	14.956	10.3608	6	6	245.74
Q5ST30	Valine--tRNA ligase, mitochondrial	VARS2	SYVM_HUMAN	0.28088	1.21494	0.01693		0.392161	0.384287	0.354539	0.490525	0.466041	0.417512	4	4	202.07
P37837	Transaldolase	TALDO1	TALDO_HUMAN	0.279579	1.21384	0.00540253	√	13.3585	13.5007	12.327	16.46	14.463	16.6428	12	12	571.34
Q15814	Tubulin-specific chaperone C	TBCC	TBCC_HUMAN	0.279538	1.21381	0.130514		0.0475474	0.0353653	0.0296604	0.0465251	0.0421366	0.0479802	1	1	33.53
Q12797-10	Isoform 10 of Aspartyl/asparaginyl beta-hydroxylase	ASPH	ASPH_HUMAN	0.278966	1.21333	0.0600183		5.59986	5.86855	5.50338	6.12273	8.05424	6.41533	12	12	574.13
P05091	Aldehyde dehydrogenase, mitochondrial	ALDH2	ALDH2_HUMAN	0.278873	1.21325	0.0352657		33.4171	36.1452	30.5564	36.6487	45.4267	39.3932	25	20	1345.71
Q8TDY4-3	Isoform 3 of Arf-GAP with SH3 domain, ANK repeat and PH domain-containing protein 3	ASAP3	ASAP3_HUMAN	0.278396	1.21285	0.093142		0.105714	0.136794	0.111845	0.119727	0.153872	0.156177	1	1	67.48
Q9HDC9	Adipocyte plasma membrane-associated protein	APMAP	APMAP_HUMAN	0.277133	1.21178	0.00452985	√	25.9348	28.5196	26.6017	30.4809	32.4755	35.2661	20	19	1011.57
Q5TBB1	Ribonuclease H2 subunit B	RNASEH2B	RNH2B_HUMAN	0.276846	1.21154	0.256298		0.0417168	0.0538633	0.0520027	0.0524709	0.0773641	0.0489679	1	1	49.53
P02042	Hemoglobin subunit delta	HBD	HBD_HUMAN	0.276324	1.21111	0.178569		22.67	20.8317	21.6368	31.7437	26.5572	20.5886	2	1	78.21
Q8IUD2-2	Isoform 2 of ELKS/Rab6-interacting/CAST family member 1	ERC1	RB6I2_HUMAN	0.276244	1.21104	0.0987207		0.165814	0.171037	0.146243	0.22217	0.200707	0.162169	4	4	118.25
Q66K74	Microtubule-associated protein 1S	MAP1S	MAP1S_HUMAN	0.27536	1.2103	0.226179		0.178295	0.212331	0.230423	0.218595	0.207067	0.325992	4	4	185.1
O95336	6-phosphogluconolactonase	PGLS	6PGL_HUMAN	0.273932	1.2091	0.000234107	√	4.09919	4.16071	4.12021	5.0921	4.93071	4.94597	7	7	298.26
P19174	1-phosphatidylinositol 4,5-bisphosphate phosphodiesterase gamma-1	PLCG1	PLCG1_HUMAN	0.272805	1.20815	0.0171836		0.456496	0.472887	0.468325	0.550549	0.504021	0.634077	6	5	240.3
Q9UDR5	Alpha-aminoadipic semialdehyde synthase, mitochondrial	AASS	AASS_HUMAN	0.272592	1.20798	0.022856		1.24832	1.40862	1.21042	1.4089	1.69311	1.56969	12	12	523.08
O15269	Serine palmitoyltransferase 1	SPTLC1	SPTC1_HUMAN	0.272297	1.20773	0.0153654		1.67157	1.95456	1.86054	2.13124	2.34501	2.15016	6	6	178.49
Q8IXM2	Chromatin complexes subunit BAP18	BAP18	BAP18_HUMAN	0.271268	1.20687	0.0532091		1.21193	1.2318	1.43793	1.73381	1.44232	1.50853	4	4	196.15
Q9UN76	Sodium- and chloride-dependent neutral and basic amino acid transporter B(0+)	SLC6A14	S6A14_HUMAN	0.270025	1.20583	0.0821307		0.284497	0.298899	0.227223	0.302046	0.369835	0.305587	4	4	183.49
Q92878	DNA repair protein RAD50	RAD50	RAD50_HUMAN	0.269998	1.20581	0.00422964	√	6.90862	6.49484	6.39434	8.32545	7.91053	7.63633	24	23	1095.66
Q9NQC3-2	Isoform 2 of Reticulon-4	RTN4	RTN4_HUMAN	0.269398	1.2053	0.0042484	√	15.0566	14.4131	13.9097	17.1764	18.3527	16.7563	9	9	555.6
P17612-2	Isoform 2 of cAMP-dependent protein kinase catalytic subunit alpha	PRKACA	KAPCA_HUMAN	0.269063	1.20503	0.0504734		0.576117	0.573923	0.48737	0.638201	0.738185	0.596735	4	2	148.59
P27707	Deoxycytidine kinase	DCK	DCK_HUMAN	0.268247	1.20434	0.0400963		0.640703	0.738638	0.660535	0.754396	0.75345	0.948866	5	5	82.91
Q9UBL3-2	Isoform 2 of Set1/Ash2 histone methyltransferase complex subunit ASH2	ASH2L	ASH2L_HUMAN	0.267848	1.20401	0.179969		0.262786	0.204503	0.160092	0.240229	0.224396	0.290749	1	1	15.14
P04626-3	Isoform 3 of Receptor tyrosine-protein kinase erbB-2	ERBB2	ERBB2_HUMAN	0.267489	1.20371	0.302837		0.0193618	0.0168718	0.00905185	0.020633	0.0171594	0.0167181	1	1	24.34
Q92563	Testican-2	SPOCK2	TICN2_HUMAN	0.26748	1.2037	0.125574		0.674681	0.683519	0.806269	0.948176	0.933849	0.723355	5	5	198.63
P02652	Apolipoprotein A-II	APOA2	APOA2_HUMAN	0.267247	1.20351	0.198536		3.01962	2.84503	3.79006	4.03404	4.44423	3.14127	3	3	132.63
Q9Y2Q3	Glutathione S-transferase kappa 1	GSTK1	GSTK1_HUMAN	0.266966	1.20327	0.00565913	√	5.30985	5.87733	6.00929	6.76989	6.80043	7.12176	8	8	417.23
Q9P0T7	Transmembrane protein 9	TMEM9	TMEM9_HUMAN	0.266912	1.20323	0.898907		0.0699894	0.0611762	0.0533304	0.0423096	0.140018	0.0396636	1	1	58.67
Q7Z7K0	COX assembly mitochondrial protein homolog	CMC1	COXM1_HUMAN	0.266731	1.20308	0.187519		1.12944	1.07933	1.39679	1.68405	1.47243	1.1813	2	2	106.86
Q9NR45	Sialic acid synthase	NANS	SIAS_HUMAN	0.26618	1.20262	0.00581978	√	12.5608	14.3792	13.304	15.6832	15.4698	17.2452	13	13	692.87
Q92890	Ubiquitin fusion degradation protein 1 homolog	UFD1L	UFD1_HUMAN	0.265946	1.20242	0.0573436		1.04125	0.93549	0.804146	1.10754	0.992381	1.24389	4	4	170.6
Q04760-2	Isoform 2 of Lactoylglutathione lyase	GLO1	LGUL_HUMAN	0.265638	1.20217	0.115763		8.2314	8.20961	10.4968	12.2439	9.59164	10.5483	11	11	481.4
Q14008-2	Isoform 2 of Cytoskeleton-associated protein 5	CKAP5	CKAP5_HUMAN	0.265636	1.20217	0.00434973	√	3.38361	3.207	3.10815	3.92664	3.59424	4.13864	23	22	981.53
P50570-2	Isoform 2 of Dynamin-2	DNM2	DYN2_HUMAN	0.265572	1.20211	0.255838		0.22311	0.134167	0.155823	0.190276	0.246826	0.179701	20	1	863.99
Q9Y2Y0-2	Isoform 2 of ADP-ribosylation factor-like protein 2-binding protein	ARL2BP	AR2BP_HUMAN	0.265394	1.20196	0.0788603		0.553274	0.500932	0.509376	0.737464	0.55384	0.588066	2	1	68.15
Q8IYU8	Calcium uptake protein 2, mitochondrial	MICU2	MICU2_HUMAN	0.265225	1.20182	0.0380234		0.308385	0.264886	0.259167	0.365874	0.303444	0.331125	1	1	70.29
O14735-3	Isoform 3 of CDP-diacylglycerol--inositol 3-phosphatidyltransferase	CDIPT	CDIPT_HUMAN	0.264811	1.20148	0.183116		0.517323	0.606163	0.603646	0.529774	0.797083	0.748255	4	4	205.39
P16949	Stathmin	STMN1	STMN1_HUMAN	0.264506	1.20122	0.37717		25.2312	18.5601	29.6629	38.0349	28.4742	21.7258	6	6	314.84
P29692-2	Isoform 2 of Elongation factor 1-delta	EEF1D	EF1D_HUMAN	0.263815	1.20065	0.0747428		2.77819	2.50625	2.61786	3.56157	3.20768	2.71865	14	3	801.67
Q5T3F8	Transmembrane protein 63B	TMEM63B	TM63B_HUMAN	0.263225	1.20016	0.299719		0.0297573	0.021074	0.0256745	0.023862	0.0276438	0.0403134	1	1	38.09
P48735	Isocitrate dehydrogenase [NADP], mitochondrial	IDH2	IDHP_HUMAN	0.263038	1.2	0.00502966	√	11.9513	12.3216	10.5113	13.6515	13.4622	14.6274	22	20	1186.54
Q8IYI6	Exocyst complex component 8	EXOC8	EXOC8_HUMAN	0.262974	1.19995	0.107954		0.0758193	0.0806285	0.0596235	0.0937855	0.0729306	0.0925586	2	2	89.85
Q9H4A4	Aminopeptidase B	RN	AMPB_HUMAN	0.262974	1.19995	0.0306791		1.63278	1.64983	1.47317	1.74318	2.13038	1.83313	8	7	289.44
P50213	Isocitrate dehydrogenase [NAD] subunit alpha, mitochondrial	IDH3A	IDH3A_HUMAN	0.262959	1.19994	0.00129067	√	7.57256	7.81856	7.26468	9.3097	8.50559	9.37027	13	13	570.42
Q15582	Transforming growth factor-beta-induced protein ig-h3	TGFBI	BGH3_HUMAN	0.262396	1.19947	0.00142105	√	5.40171	5.65299	5.04226	6.32151	6.19021	6.79609	17	17	795.61
Q9H477-2	Isoform 2 of Ribokinase	RBKS	RBSK_HUMAN	0.261882	1.19904	0.128458		0.149081	0.20895	0.183389	0.185147	0.219576	0.244462	2	2	58.07
Q6P3W7	SCY1-like protein 2	SCYL2	SCYL2_HUMAN	0.261516	1.19874	0.253538		0.046	0.0642902	0.0651574	0.0535068	0.0767373	0.0800715	2	2	48.05
Q9Y5K8	V-type proton ATPase subunit D	ATP6V1D	VATD_HUMAN	0.261305	1.19856	0.00275129	√	1.20492	1.18587	1.25739	1.46876	1.38289	1.52093	4	4	166.66
Q9H2H8	Peptidyl-prolyl cis-trans isomerase-like 3	PPIL3	PPIL3_HUMAN	0.260998	1.19831	0.251279		0.187129	0.157792	0.142608	0.159907	0.250541	0.173761	1	1	62.07
Q9UFW8	CGG triplet repeat-binding protein 1	CGGBP1	CGBP1_HUMAN	0.260635	1.19801	0.207614		0.153773	0.124573	0.149365	0.211386	0.138368	0.162647	2	2	73.31
Q9UI14	Prenylated Rab acceptor protein 1	RABAC1	PRAF1_HUMAN	0.259971	1.19745	0.00394736		0.181328	0.20045	0.174321	0.228142	0.219505	0.218256	2	2	71.14
Q9BW85	Coiled-coil domain-containing protein 94	CCDC94	CCD94_HUMAN	0.259502	1.19707	0.0257023		2.80908	2.75971	3.04429	3.73763	3.3474	3.2254	2	2	51.3
P29992	Guanine nucleotide-binding protein subunit alpha-11	GNA11	GNA11_HUMAN	0.259384	1.19697	0.0239894		1.50389	1.38439	1.22708	1.56869	1.55403	1.80323	9	8	415.38
Q8NEU8	DCC-interacting protein 13-beta	APPL2	DP13B_HUMAN	0.259066	1.1967	0.00158964		0.181801	0.184398	0.17087	0.21352	0.201456	0.227736	2	2	61.29
Q6NUK4-2	Isoform 2 of Receptor expression-enhancing protein 3	REEP3	REEP3_HUMAN	0.258554	1.19628	0.313402		0.028242	0.0317526	0.0226666	0.0361853	0.0231157	0.0395848	1	1	40
Q8TEM1	Nuclear pore membrane glycoprotein 210	NUP210	PO210_HUMAN	0.258472	1.19621	0.0109844		3.2537	3.48988	3.1267	3.6338	4.22866	3.94447	16	15	757.32
P48637	Glutathione synthetase	GSS	GSHB_HUMAN	0.258327	1.19609	0.0276108		3.82668	3.51202	3.37472	4.42106	3.7556	4.63756	9	8	281.75
Q9UPP1-5	Isoform 5 of Histone lysine demethylase PHF8	PHF8	PHF8_HUMAN	0.258322	1.19609	0.110497		0.631895	0.578865	0.513388	0.809017	0.650287	0.602926	1	1	25.41
P16219	Short-chain specific acyl-CoA dehydrogenase, mitochondrial	ACADS	ACADS_HUMAN	0.257296	1.19524	0.0102407		0.803825	0.870073	0.728085	0.918456	1.00072	0.951765	4	3	162.92
P17017	Zinc finger protein 14	ZNF14	ZNF14_HUMAN	0.256873	1.19489	0.529016		0.196277	0.1876	0.164815	0.290859	0.127422	0.237344	1	1	10.34
Q8N490	Probable hydrolase PNKD	PNKD	PNKD_HUMAN	0.256691	1.19474	0.185896		0.500843	0.420453	0.500029	0.565196	0.672428	0.460483	3	3	122.5
Q9Y508	E3 ubiquitin-protein ligase RNF114	RNF114	RN114_HUMAN	0.255719	1.19393	0.00747176	√	2.75058	2.66276	2.75075	3.31738	2.96276	3.46721	5	5	195.22
P07602	Prosaposin	PSAP	SAP_HUMAN	0.254474	1.1929	0.306917		18.6666	16.8617	24.2835	28.616	24.6181	18.1154	22	22	1081.96
P13987	CD59 glycoprotein	CD59	CD59_HUMAN	0.253868	1.1924	0.265494		3.94975	3.38587	4.8914	5.80378	4.89084	3.88488	5	5	239.63
Q96B21	Transmembrane protein 45B	TMEM45B	TM45B_HUMAN	0.253542	1.19213	0.0489271		0.477869	0.454947	0.367277	0.538403	0.473235	0.538243	3	2	104.1
O95292	Vesicle-associated membrane protein-associated protein B/C	VAPB	VAPB_HUMAN	0.252575	1.19133	0.0279487		7.4125	6.96967	7.35959	9.0166	9.07877	7.80628	9	8	554.25
P05121	Plasminogen activator inhibitor 1	SERPINE1	PAI1_HUMAN	0.252527	1.19129	0.162151		2.1492	2.79778	2.71321	2.57026	2.88855	3.6667	10	10	404.87
P62879	Guanine nucleotide-binding protein G(I)/G(S)/G(T) subunit beta-2	GNB2	GBB2_HUMAN	0.2525	1.19127	0.0157692		0.908857	0.924846	0.79126	1.11575	1.00018	1.01111	7	3	396.31
Q9Y4E8-2	Isoform 2 of Ubiquitin carboxyl-terminal hydrolase 15	USP15	UBP15_HUMAN	0.2507	1.18978	0.746435		0.0995839	0.110141	0.118375	0.0759906	0.219017	0.0953603	1	1	25
Q9NW97	Transmembrane protein 51	TMEM51	TMM51_HUMAN	0.250544	1.18966	0.338975		0.0699821	0.0534825	0.0644368	0.0927791	0.0528028	0.0779562	1	1	25.03
Q06124-3	Isoform 3 of Tyrosine-protein phosphatase non-receptor type 11	PTPN11	PTN11_HUMAN	0.250404	1.18954	0.102089		0.941064	0.839571	0.706772	1.11563	0.867173	0.976067	7	7	390.48
Q8TBF2-4	Isoform 4 of Prostamide/prostaglandin F synthase	FAM213B	PGFS_HUMAN	0.250312	1.18946	0.544124		0.0267726	0.0271545	0.015115	0.0208161	0.0197363	0.0415707	1	1	60.15
Q92541	RNA polymerase-associated protein RTF1 homolog	RTF1	RTF1_HUMAN	0.250297	1.18945	0.0413911		0.296323	0.308528	0.295142	0.386985	0.304478	0.379035	6	4	199.12
Q9Y5V0	Zinc finger protein 706	ZNF706	ZN706_HUMAN	0.249753	1.189	0.352334		0.0853476	0.0694438	0.143294	0.132998	0.123444	0.0979817	1	1	40.69
Q16543	Hsp90 co-chaperone Cdc37	CDC37	CDC37_HUMAN	0.246649	1.18645	0.0172942		7.54253	6.62705	7.09913	8.39268	8.81691	8.02463	9	9	415.1
Q8NE86-3	Isoform 3 of Calcium uniporter protein, mitochondrial	MCU	MCU_HUMAN	0.246535	1.18635	0.00498075	√	0.803087	0.834849	0.725116	0.929118	0.960563	0.913736	4	4	263.44
O75907	Diacylglycerol O-acyltransferase 1	DGAT1	DGAT1_HUMAN	0.246422	1.18626	0.008159	√	1.19686	1.0773	1.04579	1.24151	1.31984	1.37698	4	4	229.14
Q7L5D6-2	Isoform 2 of Golgi to ER traffic protein 4 homolog	GET4	GET4_HUMAN	0.245685	1.18566	0.165072		0.502629	0.477238	0.425192	0.460891	0.676481	0.528543	2	2	118.75
Q96CN9	GRIP and coiled-coil domain-containing protein 1	GCC1	GCC1_HUMAN	0.245626	1.18561	0.463329		0.0232222	0.0272561	0.0273178	0.0438232	0.0217637	0.0266487	2	2	43.53
P08183	Multidrug resistance protein 1	ABCB1	MDR1_HUMAN	0.245556	1.18555	0.00493269	√	5.52003	5.8662	5.35093	6.1115	6.77166	6.95957	22	21	933.26
Q01831-2	Isoform 2 of DNA repair protein complementing XP-C cells	XPC	XPC_HUMAN	0.245167	1.18523	0.645098		0.0648141	0.116391	0.0929427	0.0686166	0.0823869	0.173925	2	2	53.6
P23921	Ribonucleoside-diphosphate reductase large subunit	RRM1	RIR1_HUMAN	0.24416	1.1844	0.00324626	√	3.62625	3.32818	3.18004	3.98279	3.9397	4.0808	11	11	506.01
Q969V5	Mitochondrial ubiquitin ligase activator of NFKB 1	MUL1	MUL1_HUMAN	0.243599	1.18394	0.297348		0.104442	0.102377	0.0852114	0.151554	0.0920092	0.102184	2	2	115.8
Q16555-2	Isoform 2 of Dihydropyrimidinase-related protein 2	DPYSL2	DPYL2_HUMAN	0.243553	1.18391	0.00720025	√	11.4143	11.4352	10.31	12.1725	12.9536	14.1315	17	17	805.4
Q14139	Ubiquitin conjugation factor E4 A	UBE4A	UBE4A_HUMAN	0.243226	1.18364	0.0376555		0.206979	0.252464	0.212546	0.265923	0.24064	0.288828	2	2	53.12
Q9BQ95	Evolutionarily conserved signaling intermediate in Toll pathway, mitochondrial	ECSIT	ECSIT_HUMAN	0.243217	1.18363	0.0608399		0.582535	0.71257	0.735717	0.737802	0.815325	0.850612	4	4	174
P09493-5	Isoform 5 of Tropomyosin alpha-1 chain	TPM1	TPM1_HUMAN	0.242826	1.18331	0.318866		1.01669	0.849995	1.09265	1.38791	1.2542	0.859696	8	2	377.61
Q9NR28-2	Isoform 2 of Diablo homolog, mitochondrial	DIABLO	DBLOH_HUMAN	0.242776	1.18327	0.000694203	√	2.1528	2.16264	2.20069	2.62153	2.53248	2.55632	7	6	454.01
Q9BT73	Proteasome assembly chaperone 3	PSMG3	PSMG3_HUMAN	0.242186	1.18278	0.300464		0.297078	0.365909	0.278133	0.279616	0.470779	0.362748	3	3	111.92
P28482	Mitogen-activated protein kinase 1	MAPK1	MK01_HUMAN	0.242009	1.18264	0.0124229		3.90844	3.77599	3.42531	4.34307	4.03799	4.75775	15	9	760.73
P62158	Calmodulin	CALM1	CALM_HUMAN	0.241972	1.18261	0.291688		72.6924	62.325	86.3861	102.048	92.6982	67.0876	14	13	711.58
Q01518	Adenylyl cyclase-associated protein 1	CAP1	CAP1_HUMAN	0.241629	1.18233	0.010767		16.7604	16.1636	14.561	18.3181	19.7073	18.1174	18	16	852.5
P32929	Cystathionine gamma-lyase	CTH	CGL_HUMAN	0.241077	1.18187	0.13291		0.413795	0.58893	0.402469	0.514807	0.53832	0.607636	7	7	178.16
O43913-2	Isoform 2 of Origin recognition complex subunit 5	ORC5	ORC5_HUMAN	0.241039	1.18184	0.0767959		0.212377	0.229367	0.18036	0.217261	0.273566	0.244402	3	3	113.71
P02753	Retinol-binding protein 4	RBP4	RET4_HUMAN	0.241018	1.18183	0.160447		1.42096	1.51407	1.96197	2.18103	1.82025	1.78612	3	3	170.15
P57737-3	Isoform 3 of Coronin-7	CORO7	CORO7_HUMAN	0.240927	1.18175	0.305344		1.33762	1.09463	1.6378	1.39413	2.01892	1.39673	3	3	176.2
P17544-5	Isoform 5 of Cyclic AMP-dependent transcription factor ATF-7	ATF7	ATF7_HUMAN	0.240715	1.18158	0.182373		0.0261597	0.0241464	0.026941	0.0376789	0.0265932	0.0270013	1	1	38.09
P07339	Cathepsin D	CTSD	CATD_HUMAN	0.239943	1.18095	0.000404704	√	21.6166	21.7394	20.1151	24.7053	24.1941	26.0565	14	14	660.81
P40855	Peroxisomal biogenesis factor 19	PEX19	PEX19_HUMAN	0.239473	1.18056	0.123726		0.851408	0.852469	0.930402	0.959426	1.23169	0.918806	4	4	180.42
P06865	Beta-hexosaminidase subunit alpha	HEXA	HEXA_HUMAN	0.239425	1.18052	0.151299		0.580466	0.581428	0.518565	0.695333	0.519535	0.768952	5	5	223.35
Q96MF7	E3 SUMO-protein ligase NSE2	NSMCE2	NSE2_HUMAN	0.238694	1.17992	0.199809		0.0801447	0.113654	0.105033	0.138364	0.101544	0.112692	1	1	31.36
Q53H82	Beta-lactamase-like protein 2	LACTB2	LACB2_HUMAN	0.238419	1.1797	0.00986834	√	0.686436	0.615985	0.685807	0.773104	0.75745	0.814958	5	5	125.49
Q9HA64	Ketosamine-3-kinase	FN3KRP	KT3K_HUMAN	0.238134	1.17947	0.0702625		0.72367	0.831962	0.833635	0.906894	0.828612	1.08255	4	4	155.16
Q8WUN7	Ubiquitin domain-containing protein 2	UBTD2	UBTD2_HUMAN	0.238053	1.1794	0.296521		0.0649241	0.0720334	0.109513	0.108838	0.0797435	0.102106	2	2	84.42
Q9UFC0	Leucine-rich repeat and WD repeat-containing protein 1	LRWD1	LRWD1_HUMAN	0.238	1.17936	0.143208		0.240409	0.296675	0.207693	0.273569	0.261831	0.342958	6	5	191.38
O15232-2	Isoform 2 of Matrilin-3	MATN3	MATN3_HUMAN	0.237918	1.17929	0.0315847		0.389095	0.440389	0.357905	0.442303	0.502464	0.455508	4	3	150.15
Q7Z5G4	Golgin subfamily A member 7	GOLGA7	GOGA7_HUMAN	0.237872	1.17925	0.0786867		0.0703012	0.061314	0.0575773	0.0822895	0.0746362	0.06618	1	1	19.81
P83111	Serine beta-lactamase-like protein LACTB, mitochondrial	LACTB	LACTB_HUMAN	0.237562	1.179	0.0271296		0.0748682	0.0822178	0.0669123	0.088499	0.0923613	0.0832333	2	2	79.4
Q9Y696	Chloride intracellular channel protein 4	CLIC4	CLIC4_HUMAN	0.23751	1.17896	0.0879718		13.4999	13.7488	14.6474	15.9152	18.9304	14.548	14	13	705.3
Q13885	Tubulin beta-2A chain	TUBB2A	TBB2A_HUMAN	0.237474	1.17893	0.0483071		1.95051	1.8804	1.68394	2.435	1.96286	2.10375	41	1	2124.27
O43169	Cytochrome b5 type B	CYB5B	CYB5B_HUMAN	0.237401	1.17887	0.406108		46.8872	44.5637	53.5776	51.166	77.4107	42.3926	6	6	368.64
P06753-2	Isoform 2 of Tropomyosin alpha-3 chain	TPM3	TPM3_HUMAN	0.236783	1.17836	0.228709		21.1875	18.0647	21.4945	27.3211	25.5575	18.7031	18	12	951.26
O14745	Na(+)/H(+) exchange regulatory cofactor NHE-RF1	SLC9A3R1	NHRF1_HUMAN	0.235772	1.17754	0.137423		20.2818	18.3899	22.8514	26.1751	25.6372	20.6333	20	20	1064.51
Q9H6Z4-3	Isoform 3 of Ran-binding protein 3	RANBP3	RANB3_HUMAN	0.234801	1.17674	0.351983		1.06639	0.809709	0.790755	1.2657	1.11205	0.760458	4	4	244.27
O95239;Q9Y496	Chromosome-associated kinesin KIF4A	KIF4A	KIF4A_HUMAN	0.234736	1.17669	0.00602646	√	0.980117	0.871483	0.873393	1.04298	1.07488	1.08862	12	12	627.49
Q96GG9	DCN1-like protein 1	DCUN1D1	DCNL1_HUMAN	0.234626	1.1766	0.0176027		0.661076	0.711699	0.743994	0.808708	0.778592	0.903295	4	4	251.65
P53367	Arfaptin-1	ARFIP1	ARFP1_HUMAN	0.234567	1.17655	0.0140455		1.22968	1.27674	1.23931	1.43382	1.58866	1.38458	4	4	276.83
P50402	Emerin	EMD	EMD_HUMAN	0.234065	1.17614	0.0865296		2.38742	2.12271	2.29458	3.04459	2.59179	2.36694	8	7	295.55
Q8WTW3	Conserved oligomeric Golgi complex subunit 1	COG1	COG1_HUMAN	0.234002	1.17609	0.0632196		0.213008	0.244109	0.204572	0.24319	0.292802	0.242215	5	4	133.06
Q6IAN0	Dehydrogenase/reductase SDR family member 7B	DHRS7B	DRS7B_HUMAN	0.233504	1.17569	0.000431326	√	1.59805	1.64686	1.56217	1.86926	1.92323	1.85912	6	5	453.78
P49848-2	Isoform 2 of Transcription initiation factor TFIID subunit 6	TAF6	TAF6_HUMAN	0.233489	1.17567	0.0895972		0.0746285	0.0728942	0.0801877	0.103422	0.0789003	0.0853916	3	2	106.51
P60174-1	Isoform 2 of Triosephosphate isomerase	TPI1	TPIS_HUMAN	0.233315	1.17553	0.00898754	√	121.715	119.985	133.43	145.513	147.431	148.035	19	19	1248.13
Q16658	Fascin	FSCN1	FSCN1_HUMAN	0.23328	1.1755	0.0228985		2.22384	2.38001	2.3237	2.4189	2.74636	2.9781	7	7	359.26
P43490	Nicotinamide phosphoribosyltransferase	NAMPT	NAMPT_HUMAN	0.232971	1.17525	0.00423184	√	2.69713	2.85676	2.48973	3.01502	3.10792	3.33035	12	12	472.27
P01023	Alpha-2-macroglobulin	A2M	A2MG_HUMAN	0.23291	1.1752	0.00884191	√	14.5649	16.7391	14.893	17.1234	18.5278	18.6397	39	34	1820.06
Q9UHG3	Prenylcysteine oxidase 1	PCYOX1	PCYOX_HUMAN	0.232217	1.17464	0.00997595	√	10.4114	10.9256	9.95212	12.0636	11.2667	13.4231	14	13	685.93
Q5VV41	Rho guanine nucleotide exchange factor 16	ARHGEF16	ARHGG_HUMAN	0.232184	1.17461	0.165874		0.0463738	0.0706799	0.0550488	0.0681161	0.059846	0.0741914	1	1	70.98
Q96N66-2	Isoform 2 of Lysophospholipid acyltransferase 7	MBOAT7	MBOA7_HUMAN	0.232026	1.17448	0.00219722	√	0.919245	0.942752	0.846666	1.03758	1.01972	1.12398	4	4	238.44
P50750	Cyclin-dependent kinase 9	CDK9	CDK9_HUMAN	0.231596	1.17413	0.0675555		0.305579	0.287446	0.292583	0.397581	0.305457	0.336782	10	4	419.86
Q8TBX8	Phosphatidylinositol 5-phosphate 4-kinase type-2 gamma	PIP4K2C	PI42C_HUMAN	0.231431	1.174	0.0056509	√	1.17983	1.22954	1.08696	1.29606	1.42645	1.38217	8	7	350.02
Q9UPT5-2	Isoform 2 of Exocyst complex component 7	EXOC7	EXOC7_HUMAN	0.231203	1.17381	0.0483888		0.334598	0.305627	0.255996	0.330694	0.36222	0.359082	4	4	120.12
Q9Y371	Endophilin-B1	SH3GLB1	SHLB1_HUMAN	0.23081	1.17349	0.10371		0.27259	0.219336	0.251813	0.330111	0.271368	0.271292	3	2	137.35
P46976-2	Isoform GN-1 of Glycogenin-1	GYG1	GLYG_HUMAN	0.230233	1.17302	0.0506808		1.14141	1.17568	1.09976	1.23687	1.20867	1.56251	3	3	105.11
Q6NXR4	TELO2-interacting protein 2	TTI2	TTI2_HUMAN	0.228792	1.17185	0.103645		0.0229938	0.0206683	0.0179369	0.0253766	0.0204407	0.0263677	1	1	70.35
P15311	Ezrin	EZR	EZRI_HUMAN	0.228706	1.17178	0.00416461	√	9.09106	8.87188	8.83916	10.6215	9.68663	11.0981	30	20	1333.34
Q9H3Z4-2	Isoform 2 of DnaJ homolog subfamily C member 5	DNAJC5	DNJC5_HUMAN	0.228521	1.17163	0.0897593		0.407572	0.420276	0.378573	0.521212	0.490181	0.40209	2	2	60.58
O94925-3	Isoform 3 of Glutaminase kidney isoform, mitochondrial	GLS	GLSK_HUMAN	0.228141	1.17132	0.0199438		1.01287	0.938732	0.841467	1.05939	1.03613	1.17607	16	2	754.71
Q5T2E6	UPF0668 protein C10orf76	C10orf76	CJ076_HUMAN	0.227858	1.17109	0.0503632		0.168515	0.145719	0.12654	0.169865	0.171851	0.174472	2	2	68.22
P15586	N-acetylglucosamine-6-sulfatase	GNS	GNS_HUMAN	0.227711	1.17098	0.0845897		3.37128	3.52853	4.29984	4.66273	4.21277	4.23902	9	9	471.46
Q9H269-2	Isoform 2 of Vacuolar protein sorting-associated protein 16 homolog	VPS16	VPS16_HUMAN	0.227644	1.17092	0.0183402		0.101413	0.0896498	0.0897545	0.110716	0.101132	0.116967	1	1	57.46
P78536-2	Isoform B of Disintegrin and metalloproteinase domain-containing protein 17	ADAM17	ADA17_HUMAN	0.227255	1.17061	0.0493971		0.0826103	0.0709082	0.0678125	0.0934269	0.0791994	0.0864649	1	1	20.76
P19971	Thymidine phosphorylase	TYMP	TYPH_HUMAN	0.226335	1.16986	0.108636		0.25756	0.229263	0.206344	0.290177	0.286945	0.233784	4	4	170.59
Q7KZ85	Transcription elongation factor SPT6	SUPT6H	SPT6H_HUMAN	0.225682	1.16933	0.0455157		0.695218	0.687982	0.716265	0.719127	0.901051	0.834789	14	13	421.27
Q96T88	E3 ubiquitin-protein ligase UHRF1	UHRF1	UHRF1_HUMAN	0.22553	1.16921	0.0987599		0.218037	0.161196	0.164336	0.210011	0.217768	0.207766	4	2	107.93
P49427	Ubiquitin-conjugating enzyme E2 R1	CDC34	UB2R1_HUMAN	0.22498	1.16876	0.122307		1.12157	1.01627	1.16795	1.50755	1.13799	1.21814	4	4	193.23
Q6PIU2	Neutral cholesterol ester hydrolase 1	NCEH1	NCEH1_HUMAN	0.224587	1.16844	0.0478788		0.931497	0.895808	0.798646	1.04091	0.896185	1.13118	6	5	244.95
Q9Y305-3	Isoform 3 of Acyl-coenzyme A thioesterase 9, mitochondrial	ACOT9	ACOT9_HUMAN	0.224318	1.16822	0.0368878		0.409001	0.400683	0.329909	0.428259	0.422226	0.480814	6	6	200.65
Q9UNE7	E3 ubiquitin-protein ligase CHIP	STUB1	CHIP_HUMAN	0.223403	1.16748	0.0582077		1.62463	1.53294	1.64253	2.06104	1.62252	1.92047	10	10	409.85
P35244	Replication protein A 14 kDa subunit	RPA3	RFA3_HUMAN	0.222994	1.16715	0.208567		0.922818	0.843489	1.16673	1.31386	1.10327	1.00618	3	3	126.02
Q9Y3C0	WASH complex subunit CCDC53	CCDC53	CCD53_HUMAN	0.222952	1.16712	0.254297		0.15683	0.141194	0.194336	0.23047	0.180499	0.163673	1	1	64.77
Q96CN7	Isochorismatase domain-containing protein 1	ISOC1	ISOC1_HUMAN	0.222591	1.16683	0.00142114	√	3.725	3.569	3.40442	4.18583	3.98828	4.30909	8	8	440.87
Q9H469	F-box/LRR-repeat protein 15	FBXL15	FXL15_HUMAN	0.222488	1.16674	0.181625		0.248916	0.218234	0.210439	0.297517	0.279034	0.214022	3	2	115.39
O95674	Phosphatidate cytidylyltransferase 2	CDS2	CDS2_HUMAN	0.220642	1.16525	0.188818		1.81185	2.04555	1.97263	1.8427	2.72225	2.22849	5	5	199.05
Q9NZ01	Very-long-chain enoyl-CoA reductase	TECR	TECR_HUMAN	0.220525	1.16516	0.00399336	√	8.83813	8.91041	7.81274	9.70635	9.77092	10.3056	12	12	464.82
Q15942	Zyxin	ZYX	ZYX_HUMAN	0.220279	1.16496	0.184007		0.500412	0.395496	0.468233	0.628584	0.460344	0.50024	2	2	93.03
O15270	Serine palmitoyltransferase 2	SPTLC2	SPTC2_HUMAN	0.220196	1.16489	0.00264105		0.12006	0.114273	0.11395	0.140196	0.128841	0.136675	2	2	53.59
P48449	Lanosterol synthase	LSS	ERG7_HUMAN	0.219136	1.16404	0.0320222		6.84317	7.82588	6.95006	7.97201	7.78401	9.40941	19	18	792.65
Q9Y2A7	Nck-associated protein 1	NCKAP1	NCKP1_HUMAN	0.219084	1.16399	0.0452663		3.33591	3.19111	3.70912	4.16524	4.02621	3.72336	6	6	268.79
Q9NQ92	Coordinator of PRMT5 and differentiation stimulator	COPRS	COPRS_HUMAN	0.218736	1.16371	0.327599		0.0266825	0.0203021	0.0321607	0.0376944	0.0274922	0.026916	1	1	26.34
Q86YS6-2	Isoform 3 of Ras-related protein Rab-43	RAB43	RAB43_HUMAN	0.21866	1.16365	0.301865		0.0212344	0.0271191	0.0297173	0.0329314	0.0229977	0.0349181	3	1	120.59
P68371	Tubulin beta-4B chain	TUBB4B	TBB4B_HUMAN	0.218105	1.1632	0.0302565		70.5971	82.6691	74.3178	82.1474	84.9476	97.6318	48	4	2516.25
Q9BRX8-2	Isoform 2 of Redox-regulatory protein FAM213A	FAM213A	F213A_HUMAN	0.217511	1.16273	0.00165965	√	6.50851	6.92464	6.33226	7.40965	7.44918	8.12292	12	10	510.81
Q13813	Spectrin alpha chain, non-erythrocytic 1	SPTAN1	SPTN1_HUMAN	0.21738	1.16262	0.0213473		0.140701	0.126725	0.131688	0.155395	0.141156	0.167467	119	1	6424.77
P31749;P23443-4;P31751	RAC-alpha serine/threonine-protein kinase	AKT1	AKT1_HUMAN	0.21714	1.16243	0.0556748		0.137583	0.133873	0.154845	0.1758	0.166844	0.1529	4	3	115.41
Q8TB72-4	Isoform 4 of Pumilio homolog 2	PUM2	PUM2_HUMAN	0.216624	1.16201	0.0357278		0.270704	0.236216	0.225224	0.291015	0.259698	0.300045	6	4	160.78
Q9ULC5;P33121-2	Long-chain-fatty-acid--CoA ligase 5	ACSL5	ACSL5_HUMAN	0.216214	1.16168	0.00487782	√	17.0387	16.5823	15.5233	18.3722	18.2043	20.5135	24	24	1134.3
P50336	Protoporphyrinogen oxidase	PPOX	PPOX_HUMAN	0.21608	1.16157	0.866456		0.0529382	0.0887142	0.0539152	0.0292121	0.115295	0.0826592	3	2	97.41
Q8NBZ7	UDP-glucuronic acid decarboxylase 1	UXS1	UXS1_HUMAN	0.21604	1.16154	0.209821		0.643961	0.898314	0.888839	0.8397	0.876696	1.10744	4	4	205.44
P54709	Sodium/potassium-transporting ATPase subunit beta-3	ATP1B3	AT1B3_HUMAN	0.21549	1.1611	0.124619		7.0009	6.84653	8.29411	9.23217	8.94066	7.53569	7	6	355.78
Q9UNW1	Multiple inositol polyphosphate phosphatase 1	MINPP1	MINP1_HUMAN	0.214424	1.16024	0.149758		2.0501	1.95753	2.58849	2.81647	2.46003	2.37659	7	7	361.9
Q14156-3	Isoform 3 of Protein EFR3 homolog A	EFR3A	EFR3A_HUMAN	0.214187	1.16005	0.403118		0.0417433	0.0254551	0.0306338	0.0325804	0.0492905	0.0316193	1	1	79.79
P60981	Destrin	DSTN	DEST_HUMAN	0.213797	1.15974	0.014397		6.19772	5.81672	5.53051	7.16761	6.26967	6.91025	8	8	415.5
P22314	Ubiquitin-like modifier-activating enzyme 1	UBA1	UBA1_HUMAN	0.213604	1.15958	0.000689449	√	39.4493	39.7304	37.1845	43.1404	45.656	46.1373	30	30	1618.57
Q15904	V-type proton ATPase subunit S1	ATP6AP1	VAS1_HUMAN	0.213261	1.15931	0.197952		0.0646144	0.0528174	0.0694825	0.0841533	0.0679551	0.0645824	1	1	52.21
Q5VWJ9	Sorting nexin-30	SNX30	SNX30_HUMAN	0.213113	1.15919	0.24524		0.11541	0.0972652	0.0871586	0.138637	0.113799	0.0951267	1	1	20.67
Q9UHJ6	Sedoheptulokinase	SHPK	SHPK_HUMAN	0.213091	1.15917	0.0166264		1.16417	1.14927	0.997341	1.19591	1.29195	1.3499	4	4	192.98
Q8WX92	Negative elongation factor B	NELFB	NELFB_HUMAN	0.213019	1.15911	0.00496056	√	0.439971	0.430497	0.436361	0.473529	0.498371	0.54286	6	5	255.42
Q02318	Sterol 26-hydroxylase, mitochondrial	CYP27A1	CP27A_HUMAN	0.212683	1.15884	0.0124811		3.08148	2.9917	2.80752	3.35094	3.18009	3.76028	13	13	611.45
P15927	Replication protein A 32 kDa subunit	RPA2	RFA2_HUMAN	0.21232	1.15855	0.00111777	√	1.42393	1.44179	1.42379	1.69148	1.56883	1.70931	4	4	144.82
Q96P16	Regulation of nuclear pre-mRNA domain-containing protein 1A	RPRD1A	RPR1A_HUMAN	0.21137	1.15779	0.193687		0.192195	0.212909	0.228943	0.295986	0.215491	0.222615	4	2	201.27
Q7RTP0-2	Isoform 2 of Magnesium transporter NIPA1	NIPA1	NIPA1_HUMAN	0.210071	1.15675	0.0261563		0.302138	0.300758	0.258881	0.326106	0.308167	0.362584	1	1	35.53
O75937	DnaJ homolog subfamily C member 8	DNAJC8	DNJC8_HUMAN	0.209827	1.15655	0.623926		2.04963	1.8798	2.58895	2.64398	3.40581	1.48904	7	7	230.26
Q9NQT8;O43896	Kinesin-like protein KIF13B	KIF13B	KI13B_HUMAN	0.209813	1.15654	0.108034		0.571068	0.559513	0.52328	0.543041	0.734511	0.635202	7	7	259.13
Q93099	Homogentisate 1,2-dioxygenase	HGD	HGD_HUMAN	0.209641	1.1564	0.0635122		2.56708	2.56639	2.65728	2.82101	2.69579	3.49243	9	9	360.9
Q86T03	Type 1 phosphatidylinositol 4,5-bisphosphate 4-phosphatase	TMEM55B	TM55B_HUMAN	0.209561	1.15634	0.142843		0.294827	0.353745	0.314491	0.332216	0.33318	0.448228	2	2	70.53
Q9H0R4	Haloacid dehalogenase-like hydrolase domain-containing protein 2	HDHD2	HDHD2_HUMAN	0.209438	1.15624	0.0113977		0.453631	0.481521	0.478414	0.547036	0.501272	0.58611	4	4	126.18
O94874	E3 UFM1-protein ligase 1	UFL1	UFL1_HUMAN	0.208782	1.15571	0.00290741	√	4.48716	4.43748	4.19523	4.76052	5.19968	5.2026	17	17	731.31
P07148	Fatty acid-binding protein, liver	FABP1	FABPL_HUMAN	0.208686	1.15564	0.19257		42.2618	34.8136	43.0847	54.1073	44.3399	40.4141	10	9	428.94
Q9H330-2	Isoform 2 of Transmembrane protein 245	TMEM245	TM245_HUMAN	0.208228	1.15527	0.0364946		0.213079	0.254118	0.230558	0.275233	0.244777	0.286084	2	2	119.93
Q5T1M5	FK506-binding protein 15	FKBP15	FKB15_HUMAN	0.208204	1.15525	0.355288		0.0335231	0.046601	0.0435156	0.0348769	0.0521817	0.0557761	3	2	78.95
O15162	Phospholipid scramblase 1	PLSCR1	PLS1_HUMAN	0.208161	1.15521	0.156866		0.248419	0.254427	0.231115	0.258003	0.339555	0.250324	2	2	80.41
Q6UWP2	Dehydrogenase/reductase SDR family member 11	DHRS11	DHR11_HUMAN	0.207979	1.15507	0.411127		0.0298054	0.0691132	0.0510175	0.0478721	0.0576052	0.0677091	1	1	34.65
Q9NP58-4	Isoform 2 of ATP-binding cassette sub-family B member 6, mitochondrial	ABCB6	ABCB6_HUMAN	0.20794	1.15504	0.00715814	√	0.480303	0.481777	0.42527	0.549839	0.508769	0.543834	6	6	287.58
Q96RN5-3	Isoform 3 of Mediator of RNA polymerase II transcription subunit 15	MED15	MED15_HUMAN	0.207383	1.15459	0.41365		0.0341822	0.030035	0.0527666	0.0570184	0.0372469	0.0408031	1	1	45.87
Q8IZ83	Aldehyde dehydrogenase family 16 member A1	ALDH16A1	A16A1_HUMAN	0.207244	1.15448	0.0745788		2.14824	2.47156	2.193	2.26374	2.66882	2.93268	12	12	636.86
P48507	Glutamate--cysteine ligase regulatory subunit	GCLM	GSH0_HUMAN	0.206602	1.15397	0.0336976		1.33549	1.48383	1.41968	1.54254	1.51409	1.83503	7	7	271.39
Q9Y4P1-6	Isoform 6 of Cysteine protease ATG4B	ATG4B	ATG4B_HUMAN	0.206529	1.15391	0.110465		3.87302	4.59986	4.24143	4.39858	4.49847	5.77411	11	11	518.45
P14324-2	Isoform 2 of Farnesyl pyrophosphate synthase	FDPS	FPPS_HUMAN	0.206512	1.15389	0.0110789		8.88144	9.48354	8.40258	9.77741	9.88345	11.2261	7	7	418.46
P51452	Dual specificity protein phosphatase 3	DUSP3	DUS3_HUMAN	0.206445	1.15384	0.0413531		0.835689	0.779734	0.748455	0.988234	0.80958	0.929726	2	2	120
P61163	Alpha-centractin	ACTR1A	ACTZ_HUMAN	0.206438	1.15384	0.084304		7.57884	6.87032	6.30997	7.33993	9.00925	7.60345	15	7	781.07
Q99541	Perilipin-2	PLIN2	PLIN2_HUMAN	0.206428	1.15383	0.060952		6.87902	7.52714	6.81309	7.5129	9.21781	7.75264	14	14	720.97
Q96FV2-2	Isoform 2 of Secernin-2	SCRN2	SCRN2_HUMAN	0.206359	1.15377	0.32737		0.0228764	0.0174354	0.0315001	0.0311645	0.0259643	0.0257258	1	1	56.45
Q9NWV8	BRISC and BRCA1-A complex member 1	BABAM1	BABA1_HUMAN	0.206237	1.15367	0.357063		0.176179	0.183668	0.173462	0.158449	0.269138	0.187678	2	2	94.65
P42566	Epidermal growth factor receptor substrate 15	EPS15	EPS15_HUMAN	0.205668	1.15322	0.242174		0.223756	0.171996	0.187563	0.227954	0.260343	0.184394	5	4	182.55
Q96EK7-2	Isoform 2 of Constitutive coactivator of peroxisome proliferator-activated receptor gamma	FAM120B	F120B_HUMAN	0.20471	1.15245	0.345708		0.00676986	0.011951	0.00746186	0.0116771	0.00817136	0.0103259	1	1	25.1
O95197-3	Isoform 3 of Reticulon-3	RTN3	RTN3_HUMAN	0.204615	1.15238	0.136904		1.9379	2.37563	2.15598	2.41298	2.12867	2.91368	3	3	182.27
Q96BN8	Ubiquitin thioesterase otulin	OTULIN	OTUL_HUMAN	0.204474	1.15227	0.222507		0.145141	0.168864	0.169206	0.157653	0.167247	0.231887	2	2	82.59
O14880	Microsomal glutathione S-transferase 3	MGST3	MGST3_HUMAN	0.204381	1.15219	0.053844		1.65066	1.77306	1.7296	1.79787	1.85967	2.28008	3	3	186.11
Q8IX01-4	Isoform 4 of SURP and G-patch domain-containing protein 2	SUGP2	SUGP2_HUMAN	0.204268	1.1521	0.0627724		0.414753	0.417199	0.437779	0.431148	0.542178	0.489534	8	6	340.87
P53007	Tricarboxylate transport protein, mitochondrial	SLC25A1	TXTP_HUMAN	0.203641	1.1516	0.00818326	√	18.5422	20.3572	17.5	21.1192	20.924	22.9065	11	11	482.67
Q99500	Sphingosine 1-phosphate receptor 3	S1PR3	S1PR3_HUMAN	0.20315	1.15121	0.373814		0.0529848	0.0446904	0.0483462	0.0693706	0.0573608	0.0413698	1	1	23.11
Q5T1J5	Putative coiled-coil-helix-coiled-coil-helix domain-containing protein CHCHD2P9, mitochondrial	CHCHD2P9	CHCH9_HUMAN	0.202527	1.15071	0.457267		0.7776	0.629522	0.988287	1.08223	1.021	0.653199	2	2	122.4
Q9P2R7-2	Isoform 2 of Succinyl-CoA ligase [ADP-forming] subunit beta, mitochondrial	SUCLA2	SUCB1_HUMAN	0.201958	1.15026	0.216272		3.31774	3.18344	2.82834	3.03717	3.20859	4.4856	6	6	334.06
Q9NZ32	Actin-related protein 10	ACTR10	ARP10_HUMAN	0.201389	1.1498	0.0438455		0.319376	0.312096	0.350726	0.35601	0.406468	0.366857	4	4	130.85
Q9NV35	Probable 8-oxo-dGTP diphosphatase NUDT15	NUDT15	NUD15_HUMAN	0.201305	1.14974	0.222002		0.123196	0.143803	0.162782	0.150273	0.144385	0.199476	2	2	128.85
Q9BSF4	Uncharacterized protein C19orf52	C19orf52	CS052_HUMAN	0.200636	1.14921	0.0638438		0.130056	0.145799	0.126554	0.137055	0.170449	0.154946	1	1	21.11
Q9H7D7-2	Isoform 2 of WD repeat-containing protein 26	WDR26	WDR26_HUMAN	0.200575	1.14916	0.353403		0.103338	0.099779	0.0596976	0.0944982	0.0850571	0.122459	2	2	95.04
P22061	Protein-L-isoaspartate(D-aspartate) O-methyltransferase	PCMT1	PIMT_HUMAN	0.200229	1.14888	0.191906		3.62529	3.01056	3.55013	4.47991	3.90347	3.31909	8	8	386.16
O75935-3	Isoform 3 of Dynactin subunit 3	DCTN3	DCTN3_HUMAN	0.200142	1.14881	0.00677556		0.109636	0.116678	0.119792	0.135159	0.127354	0.135098	3	2	86.03
Q15345	Leucine-rich repeat-containing protein 41	LRRC41	LRC41_HUMAN	0.19992	1.14863	0.246661		0.129172	0.140636	0.185403	0.176958	0.193797	0.152116	2	1	52.63
Q08209-5	Isoform 5 of Serine/threonine-protein phosphatase 2B catalytic subunit alpha isoform	PPP3CA	PP2BA_HUMAN	0.199561	1.14835	0.224528		0.244157	0.182934	0.162585	0.255179	0.200401	0.221574	2	1	103.8
Q8TCT8	Signal peptide peptidase-like 2A	SPPL2A	SPP2A_HUMAN	0.199091	1.14797	0.500442		0.0110901	0.00306786	0.00917321	0.0107805	0.00765862	0.0083445	1	1	33.88
P33316	Deoxyuridine 5'-triphosphate nucleotidohydrolase, mitochondrial	DUT	DUT_HUMAN	0.198478	1.14749	0.304167		4.4867	3.23774	4.53508	5.49309	4.65223	3.92231	7	6	358.46
Q9BQ61	Uncharacterized protein C19orf43	C19orf43	CS043_HUMAN	0.197868	1.147	0.487042		1.18117	0.913341	1.50633	1.37983	1.75761	0.992741	6	6	244.31
Q14289-2	Isoform 2 of Protein-tyrosine kinase 2-beta	PTK2B	FAK2_HUMAN	0.197508	1.14672	0.512387		0.225654	0.158597	0.138993	0.192911	0.137008	0.270092	1	1	20.15
Q12974	Protein tyrosine phosphatase type IVA 2	PTP4A2	TP4A2_HUMAN	0.197497	1.14671	0.0798387		0.01831	0.0194065	0.0205293	0.0249908	0.0212442	0.0205558	4	1	192.92
Q9H9H4	Vacuolar protein sorting-associated protein 37B	VPS37B	VP37B_HUMAN	0.197039	1.14634	0.212744		0.0870627	0.0859018	0.116797	0.116005	0.11771	0.0984511	1	1	33.13
Q96JB5	CDK5 regulatory subunit-associated protein 3	CDK5RAP3	CK5P3_HUMAN	0.196927	1.14625	0.0119808		2.25903	2.25588	2.13985	2.7043	2.50982	2.41393	12	9	416.88
P84157	Matrix-remodeling-associated protein 7	MXRA7	MXRA7_HUMAN	0.196653	1.14604	0.0968864		0.174246	0.167199	0.178566	0.227421	0.188213	0.180317	3	1	149.32
O15533-2	Isoform 2 of Tapasin	TAPBP	TPSN_HUMAN	0.196528	1.14594	0.10904		0.212389	0.239978	0.185572	0.225038	0.225727	0.280274	3	3	103.11
Q658Y4	Protein FAM91A1	FAM91A1	F91A1_HUMAN	0.196363	1.14581	0.0380986		0.215055	0.217446	0.229996	0.234612	0.24019	0.284291	3	3	119.51
Q9NZZ3	Charged multivesicular body protein 5	CHMP5	CHMP5_HUMAN	0.196261	1.14572	0.367227		2.40526	2.15208	3.26242	3.47639	3.12212	2.36079	5	3	159.59
P04406	Glyceraldehyde-3-phosphate dehydrogenase	GAPDH	G3P_HUMAN	0.195884	1.14543	0.00755373	√	604.284	639.678	552.695	657.016	680.213	720.709	38	37	2093.38
Q96K19-4	Isoform 4 of E3 ubiquitin-protein ligase RNF170	RNF170	RN170_HUMAN	0.195477	1.1451	0.729714		0.012124	0.016026	0.0200743	0.0162889	0.0103973	0.0285355	1	1	37.47
O14967	Calmegin	CLGN	CLGN_HUMAN	0.195102	1.14481	0.00179607	√	1.70586	1.86527	1.70383	1.95546	2.00585	2.07748	7	6	263.77
Q5VT66	Mitochondrial amidoxime-reducing component 1	MARC1	MARC1_HUMAN	0.195079	1.14479	0.131003		0.465262	0.590643	0.522483	0.517069	0.647286	0.642563	7	4	326.44
O95168-2	Isoform 2 of NADH dehydrogenase [ubiquinone] 1 beta subcomplex subunit 4	NDUFB4	NDUB4_HUMAN	0.194859	1.14461	0.195913		5.00036	4.8621	5.61474	5.99423	6.76439	4.95678	4	3	154.67
Q99808	Equilibrative nucleoside transporter 1	SLC29A1	S29A1_HUMAN	0.19451	1.14434	0.183093		0.998981	1.10646	0.995383	0.942603	1.29609	1.3097	4	4	221.03
P37268	Squalene synthase	FDFT1	FDFT_HUMAN	0.194291	1.14416	0.0180299		28.4042	28.2741	27.153	30.0717	30.215	35.6299	21	20	1172.13
Q9UNH7	Sorting nexin-6	SNX6	SNX6_HUMAN	0.194016	1.14394	0.0498674		0.561784	0.560633	0.468896	0.65439	0.579981	0.586	5	4	149.48
O15511	Actin-related protein 2/3 complex subunit 5	ARPC5	ARPC5_HUMAN	0.19381	1.14378	0.612156		0.918296	0.739228	0.961349	0.852344	1.45699	0.686078	5	4	293.43
P04075	Fructose-bisphosphate aldolase A	ALDOA	ALDOA_HUMAN	0.193671	1.14367	0.00654234	√	310.721	304.389	272.424	345.504	329.822	339.72	31	27	1643.6
Q15542	Transcription initiation factor TFIID subunit 5	TAF5	TAF5_HUMAN	0.193657	1.14366	0.0741082		0.028239	0.0248069	0.0222515	0.0283487	0.0306451	0.0271207	1	1	27.02
P12004	Proliferating cell nuclear antigen	PCNA	PCNA_HUMAN	0.19352	1.14355	0.0167154		38.3014	35.0754	32.9237	42.2088	39.0079	40.3433	13	13	695.65
Q9Y6I9	Testis-expressed sequence 264 protein	TEX264	TX264_HUMAN	0.193145	1.14325	0.140927		0.222816	0.223546	0.212211	0.280492	0.204846	0.267578	3	2	113.87
Q5JRX3	Presequence protease, mitochondrial	PITRM1	PREP_HUMAN	0.193092	1.14321	0.00249665	√	3.37538	3.46811	3.24058	3.76151	3.9876	3.77911	20	20	742.31
O60341	Lysine-specific histone demethylase 1A	KDM1A	KDM1A_HUMAN	0.192716	1.14291	0.625339		4.96626	2.45105	2.19942	4.85438	4.02305	2.11365	13	12	516.05
Q68EM7-6	Isoform 6 of Rho GTPase-activating protein 17	ARHGAP17	RHG17_HUMAN	0.192545	1.14278	0.12782		0.457125	0.519308	0.521097	0.487655	0.640842	0.582847	4	4	163.2
P42224	Signal transducer and activator of transcription 1-alpha/beta	STAT1	STAT1_HUMAN	0.191986	1.14233	0.147572		2.45426	2.4926	2.13914	2.9587	2.21587	2.92001	11	10	528.27
P55789	FAD-linked sulfhydryl oxidase ALR	GFER	ALR_HUMAN	0.191561	1.142	0.401731		0.242751	0.174302	0.249169	0.313463	0.249214	0.198148	3	3	89.62
Q9NXG2	THUMP domain-containing protein 1	THUMPD1	THUM1_HUMAN	0.191261	1.14176	0.134215		2.16993	2.24186	2.22265	2.22264	2.96771	2.38459	7	6	293.23
Q9P253	Vacuolar protein sorting-associated protein 18 homolog	VPS18	VPS18_HUMAN	0.191253	1.14175	0.0595634		0.171824	0.185402	0.16796	0.215273	0.173539	0.210821	3	3	126.1
Q96EK5	KIF1-binding protein	KIAA1279	KBP_HUMAN	0.190974	1.14153	0.0938477		0.158997	0.193063	0.165043	0.17691	0.188914	0.224468	3	3	138.54
Q00577	Transcriptional activator protein Pur-alpha	PURA	PURA_HUMAN	0.190751	1.14136	0.0101638		0.910773	0.922691	0.995922	1.08561	1.07099	1.07274	5	4	153.9
Q96C19	EF-hand domain-containing protein D2	EFHD2	EFHD2_HUMAN	0.190659	1.14128	0.129989		0.77598	0.755161	0.773001	1.03013	0.780419	0.819131	6	6	194.94
Q14520-2	Isoform 2 of Hyaluronan-binding protein 2	HABP2	HABP2_HUMAN	0.190495	1.14115	0.074741		0.141413	0.159859	0.126981	0.163178	0.174591	0.150933	2	2	74.12
Q96P70	Importin-9	IPO9	IPO9_HUMAN	0.190094	1.14084	0.106862		1.06913	1.14751	0.961992	1.14433	1.06967	1.4123	11	9	626.95
Q8NBJ7	Sulfatase-modifying factor 2	SUMF2	SUMF2_HUMAN	0.189971	1.14074	0.244639		1.21872	1.02973	1.38043	1.62381	1.2682	1.24759	6	6	265.68
Q9NNW5	WD repeat-containing protein 6	WDR6	WDR6_HUMAN	0.189955	1.14073	0.959003		0.036108	0.0499846	0.0244658	0.0267527	0.0837212	0.0156432	1	1	13.07
Q8ND76-3	Isoform 3 of Cyclin-Y	CCNY	CCNY_HUMAN	0.189899	1.14068	0.0301854		0.557783	0.506812	0.463829	0.603722	0.546768	0.592959	4	4	237.19
Q6UX53	Methyltransferase-like protein 7B	METTL7B	MET7B_HUMAN	0.189768	1.14058	0.00508253	√	2.52554	2.61597	2.38324	2.68837	2.94194	2.95228	7	6	288.77
Q6P1J9	Parafibromin	CDC73	CDC73_HUMAN	0.18963	1.14047	0.0290519		1.24857	1.29676	1.39161	1.40994	1.44968	1.63035	7	7	232.9
P20839	Inosine-5'-monophosphate dehydrogenase 1	IMPDH1	IMDH1_HUMAN	0.189542	1.1404	0.630358		0.104331	0.114172	0.106543	0.0873767	0.184533	0.098773	2	1	82.71
Q9HCM4-3	Isoform 3 of Band 4.1-like protein 5	EPB41L5	E41L5_HUMAN	0.189205	1.14014	0.114403		0.402847	0.475524	0.35073	0.499251	0.467835	0.434255	5	3	307.95
O00461	Golgi integral membrane protein 4	GOLIM4	GOLI4_HUMAN	0.189062	1.14002	0.0916047		1.3895	1.29234	1.45346	1.77034	1.46291	1.48108	7	6	422.1
P40925	Malate dehydrogenase, cytoplasmic	MDH1	MDHC_HUMAN	0.188857	1.13986	0.0120954		46.4349	49.3557	43.0125	53.5845	49.1786	55.4531	11	11	552.21
Q9UI12-2	Isoform 2 of V-type proton ATPase subunit H	ATP6V1H	VATH_HUMAN	0.188708	1.13974	0.0423801		1.73432	1.73982	1.75718	1.77589	2.16452	2.02194	10	10	440.1
Q6NXT1-2	Isoform 2 of Ankyrin repeat domain-containing protein 54	ANKRD54	ANR54_HUMAN	0.188596	1.13965	0.217442		0.121092	0.121862	0.152367	0.153205	0.168187	0.129137	2	2	83.72
Q9P2X0	Dolichol-phosphate mannosyltransferase subunit 3	DPM3	DPM3_HUMAN	0.188329	1.13944	0.0524586		0.922155	0.808938	0.853076	1.0688	0.903813	0.971899	2	2	120.92
O00154-6	Isoform 6 of Cytosolic acyl coenzyme A thioester hydrolase	ACOT7	BACH_HUMAN	0.188305	1.13942	0.0146764		7.25612	7.54524	6.51916	7.60356	8.08485	8.60471	11	11	560.37
Q9UKY7	Protein CDV3 homolog	CDV3	CDV3_HUMAN	0.187539	1.13882	0.672228		2.69867	2.68567	3.99219	2.77608	5.43201	2.47008	5	5	158.79
O94905	Erlin-2	ERLIN2	ERLN2_HUMAN	0.187528	1.13881	0.0212518		5.68152	6.25159	5.54284	6.06884	6.78538	7.04759	13	11	744.05
P08134	Rho-related GTP-binding protein RhoC	RHOC	RHOC_HUMAN	0.187433	1.13874	0.0636474		1.5978	1.55871	1.41752	1.89838	1.52562	1.78461	8	1	366.88
O95394	Phosphoacetylglucosamine mutase	PGM3	AGM1_HUMAN	0.187387	1.1387	0.0144621		6.28438	7.02028	6.21443	7.02572	7.20825	7.9924	16	16	650.18
Q9Y6K0	Choline/ethanolaminephosphotransferase 1	CEPT1	CEPT1_HUMAN	0.187172	1.13853	0.171324		0.217667	0.209317	0.19003	0.26035	0.246727	0.195412	1	1	25.76
Q9UBI1	COMM domain-containing protein 3	COMMD3	COMD3_HUMAN	0.187052	1.13844	0.228531		0.320391	0.266874	0.341989	0.414196	0.327507	0.316192	3	3	147.47
Q9UNZ2	NSFL1 cofactor p47	NSFL1C	NSF1C_HUMAN	0.187002	1.1384	0.0372212		11.7655	11.3244	12.1021	14.0159	13.7094	12.3371	12	12	643.98
Q03167-2	Isoform 2 of Transforming growth factor beta receptor type 3	TGFBR3	TGBR3_HUMAN	0.186814	1.13825	0.137203		0.0648112	0.0482221	0.059615	0.0616433	0.0682051	0.0666682	1	1	44.98
P03915	NADH-ubiquinone oxidoreductase chain 5	MT-ND5	NU5M_HUMAN	0.185887	1.13752	0.0848093		3.21024	3.04195	2.71617	2.97158	3.68694	3.54315	7	7	388.26
P55196-1	Isoform 2 of Afadin	MLLT4	AFAD_HUMAN	0.18587	1.1375	0.0310125		1.30024	1.3671	1.38015	1.38757	1.62899	1.58748	14	14	557.91
Q96CW1-2	Isoform 2 of AP-2 complex subunit mu	AP2M1	AP2M1_HUMAN	0.185528	1.13723	0.0055109	√	1.68165	1.60995	1.57567	1.73164	1.88938	1.9142	8	8	327.62
Q9UJX6-2	Isoform 2 of Anaphase-promoting complex subunit 2	ANAPC2	ANC2_HUMAN	0.185423	1.13715	0.0744548		0.0628406	0.0583217	0.050793	0.0706581	0.0637246	0.0611563	1	1	39.54
P43155-2	Isoform 2 of Carnitine O-acetyltransferase	CRAT	CACP_HUMAN	0.185318	1.13707	0.023882		2.83207	3.13055	2.64692	3.27937	3.03258	3.47767	12	11	601.09
Q06323	Proteasome activator complex subunit 1	PSME1	PSME1_HUMAN	0.184803	1.13666	0.186241		13.4082	11.5521	14.0619	17.0914	14.0327	13.231	12	12	553.69
Q9H0H0	Integrator complex subunit 2	INTS2	INT2_HUMAN	0.184275	1.13625	0.737563		0.0124782	0.00993946	0.0106583	0.00930734	0.0198343	0.00844082	1	1	38.05
Q8N2K0	Monoacylglycerol lipase ABHD12	ABHD12	ABD12_HUMAN	0.184168	1.13616	0.00023143	√	2.1462	2.14329	2.1093	2.43191	2.42788	2.41028	9	7	534.69
Q9H0E9-4	Isoform 4 of Bromodomain-containing protein 8	BRD8	BRD8_HUMAN	0.184109	1.13612	0.756734		0.0391192	0.0333009	0.0335601	0.048784	0.0204001	0.0512215	1	1	23.42
Q96CT7	Coiled-coil domain-containing protein 124	CCDC124	CC124_HUMAN	0.183961	1.136	0.440025		0.310867	0.244717	0.401163	0.399199	0.41378	0.273885	4	4	255.83
Q9HBL7	Plasminogen receptor (KT)	PLGRKT	PLRKT_HUMAN	0.183859	1.13592	0.126058		0.238499	0.324821	0.237211	0.304028	0.293516	0.311795	2	2	124.06
Q9UBU6	Protein FAM8A1	FAM8A1	FA8A1_HUMAN	0.183416	1.13557	0.0344224		0.40787	0.359061	0.348598	0.41137	0.444122	0.411269	3	2	148.77
Q9NWU2	Glucose-induced degradation protein 8 homolog	GID8	GID8_HUMAN	0.183292	1.13547	0.302045		0.81269	0.906195	1.29601	1.12586	1.25493	1.04254	5	5	245.75
Q16881-5	Isoform 5 of Thioredoxin reductase 1, cytoplasmic	TXNRD1	TRXR1_HUMAN	0.183253	1.13544	0.00447331	√	2.76001	2.77122	2.70199	2.91358	3.21301	3.22174	12	11	724.42
P07902	Galactose-1-phosphate uridylyltransferase	GALT	GALT_HUMAN	0.183055	1.13529	0.154366		0.0796592	0.0710614	0.0680266	0.0963638	0.0722024	0.0797744	1	1	61.5
Q63HN8	E3 ubiquitin-protein ligase RNF213	RNF213	RN213_HUMAN	0.182872	1.13514	0.255061		0.502328	0.444591	0.383179	0.4705	0.604272	0.435079	3	2	87.56
Q9NRK6	ATP-binding cassette sub-family B member 10, mitochondrial	ABCB10	ABCBA_HUMAN	0.182865	1.13514	0.161414		0.183435	0.198054	0.205978	0.216504	0.187743	0.262608	3	2	117.15
Q14919	Dr1-associated corepressor	DRAP1	NC2A_HUMAN	0.182753	1.13505	0.514093		0.3074	0.246022	0.379669	0.439418	0.372906	0.246778	2	2	102.89
Q9NUP9;O14910	Protein lin-7 homolog C	LIN7C	LIN7C_HUMAN	0.182662	1.13498	0.289235		0.526843	0.469241	0.566351	0.722714	0.553549	0.497063	3	3	152.11
P46459	Vesicle-fusing ATPase	NSF	NSF_HUMAN	0.18232	1.13471	0.00872602	√	9.8474	9.69532	8.59724	10.3791	10.3921	11.1593	29	27	1341.59
O76024	Wolframin	WFS1	WFS1_HUMAN	0.182261	1.13466	0.0683027		3.33477	3.52923	3.2257	3.34035	4.19403	3.91402	14	14	614.94
Q92947	Glutaryl-CoA dehydrogenase, mitochondrial	GCDH	GCDH_HUMAN	0.181897	1.13437	0.288687		1.3716	1.91202	1.6675	1.51542	1.87949	2.22152	5	5	238.7
Q13136	Liprin-alpha-1	PPFIA1	LIPA1_HUMAN	0.181507	1.13407	0.46978		0.0850485	0.0846533	0.0844851	0.0724262	0.0831969	0.132642	5	4	173.27
P20585	DNA mismatch repair protein Msh3	MSH3	MSH3_HUMAN	0.18144	1.13402	0.102641		0.0387311	0.0436336	0.0384238	0.0472049	0.0388816	0.0508895	3	1	56.94
Q5VIR6-4	Isoform 4 of Vacuolar protein sorting-associated protein 53 homolog	VPS53	VPS53_HUMAN	0.180635	1.13338	0.385566		0.148891	0.102119	0.0717793	0.105244	0.135501	0.125099	2	1	38.72
P68402	Platelet-activating factor acetylhydrolase IB subunit beta	PAFAH1B2	PA1B2_HUMAN	0.180619	1.13337	0.271296		3.56391	3.26741	4.4262	4.5201	4.65411	3.58472	5	5	267.86
Q16891-4	Isoform 4 of Mitochondrial inner membrane protein	IMMT	IMMT_HUMAN	0.180035	1.13291	0.597364		0.140326	0.11675	0.114387	0.117834	0.202241	0.100761	27	1	1460.02
Q9NPA8-2	Isoform 2 of Transcription and mRNA export factor ENY2	ENY2	ENY2_HUMAN	0.179564	1.13254	0.457201		0.130167	0.0937498	0.145717	0.16432	0.150503	0.103803	1	1	36.22
Q9H0W9-2	Isoform 2 of Ester hydrolase C11orf54	C11orf54	CK054_HUMAN	0.178759	1.13191	0.0756944		1.44151	1.49275	1.66816	1.86047	1.73094	1.61812	5	5	229.53
Q15555-4	Isoform 4 of Microtubule-associated protein RP/EB family member 2	MAPRE2	MARE2_HUMAN	0.17853	1.13173	0.00867913	√	2.18883	2.38109	2.32619	2.58031	2.68223	2.54201	8	6	297.88
P61960	Ubiquitin-fold modifier 1	UFM1	UFM1_HUMAN	0.178287	1.13154	0.172422		0.579076	0.551431	0.626167	0.660931	0.753697	0.573119	3	3	59.42
Q8N5M4	Tetratricopeptide repeat protein 9C	TTC9C	TTC9C_HUMAN	0.178253	1.13151	0.177291		0.225771	0.19303	0.241483	0.277168	0.247596	0.222356	5	3	133.74
Q92597	Protein NDRG1	NDRG1	NDRG1_HUMAN	0.177483	1.13091	0.168219		5.0752	6.46733	6.49203	5.96017	7.05871	7.37656	9	9	579.35
Q9UDX5	Mitochondrial fission process protein 1	MTFP1	MTFP1_HUMAN	0.177414	1.13085	0.0444752		0.44509	0.410181	0.373395	0.428018	0.489212	0.472212	2	2	67.52
Q7Z406-6	Isoform 6 of Myosin-14	MYH14	MYH14_HUMAN	0.177191	1.13068	0.026035		3.69314	4.06921	3.87565	4.27783	4.68705	4.19397	34	24	1861.69
Q07812-8	Isoform Sigma of Apoptosis regulator BAX	BAX	BAX_HUMAN	0.176911	1.13046	0.0459046		9.89603	9.60492	10.7007	11.6159	11.8408	10.685	12	12	759.8
P00374	Dihydrofolate reductase	DHFR	DYR_HUMAN	0.176525	1.13016	0.0255213		4.14094	4.4916	3.69889	4.5901	4.44596	4.90039	6	6	322.77
Q96T51	RUN and FYVE domain-containing protein 1	RUFY1	RUFY1_HUMAN	0.176379	1.13004	0.126411		0.563124	0.677024	0.641683	0.610732	0.737545	0.778275	6	5	270.09
Q6P9B6	TLD domain-containing protein 1	TLDC1	TLDC1_HUMAN	0.176365	1.13003	0.164063		0.078761	0.0837309	0.0633205	0.0872014	0.0732923	0.0946818	2	2	94.26
Q8N4A0	Polypeptide N-acetylgalactosaminyltransferase 4	GALNT4	GALT4_HUMAN	0.176285	1.12997	0.627032		0.00575017	0.0146646	0.00998028	0.013617	0.0138976	0.00683092	2	1	72.92
Q13425	Beta-2-syntrophin	SNTB2	SNTB2_HUMAN	0.176277	1.12996	0.97186		0.062332	0.0517319	0.0526612	0.0636787	0.0211905	0.103524	6	3	224.55
Q96EY8	Cob(I)yrinic acid a,c-diamide adenosyltransferase, mitochondrial	MMAB	MMAB_HUMAN	0.175992	1.12974	0.0100131		6.50246	6.45807	6.70063	7.78167	7.1174	7.31295	6	6	386.71
Q9Y333	U6 snRNA-associated Sm-like protein LSm2	LSM2	LSM2_HUMAN	0.175933	1.12969	0.0120175		1.60003	1.52776	1.54721	1.69228	1.86194	1.72712	2	2	113.48
Q9BUT1	3-hydroxybutyrate dehydrogenase type 2	BDH2	BDH2_HUMAN	0.175666	1.12949	0.208351		0.382467	0.40639	0.332441	0.397464	0.357937	0.511088	4	4	140.38
P49841	Glycogen synthase kinase-3 beta	GSK3B	GSK3B_HUMAN	0.175424	1.1293	0.201968		0.27161	0.251335	0.183795	0.254804	0.286708	0.256606	2	2	56.25
Q8TBC4-2	Isoform 2 of NEDD8-activating enzyme E1 catalytic subunit	UBA3	UBA3_HUMAN	0.175247	1.12916	0.436796		0.0368146	0.0579017	0.040678	0.0417983	0.0658122	0.0452711	2	1	48.96
Q96SK2-3	Isoform 3 of Transmembrane protein 209	TMEM209	TM209_HUMAN	0.175034	1.12899	0.421315		0.115777	0.0966492	0.0949718	0.082338	0.134666	0.130045	2	2	98.32
Q5JRA6-2	Isoform 2 of Melanoma inhibitory activity protein 3	MIA3	MIA3_HUMAN	0.174793	1.1288	0.20861		0.649986	0.68875	0.672203	0.846177	0.803166	0.62061	5	5	266.07
Q92575	UBX domain-containing protein 4	UBXN4	UBXN4_HUMAN	0.17455	1.12861	0.323251		3.59952	3.37807	3.26916	3.51825	4.85078	3.19557	7	7	297.45
Q8TAT6	Nuclear protein localization protein 4 homolog	NPLOC4	NPL4_HUMAN	0.174422	1.12851	0.0525684		1.65137	1.90111	1.56752	1.90512	1.77511	2.09775	7	7	277.18
P50583	Bis(5'-nucleosyl)-tetraphosphatase [asymmetrical]	NUDT2	AP4A_HUMAN	0.174208	1.12834	0.0896693		0.78179	0.80768	0.791974	0.866221	0.784803	1.03607	3	3	112.05
Q7Z6Z7-2	Isoform 2 of E3 ubiquitin-protein ligase HUWE1	HUWE1	HUWE1_HUMAN	0.173961	1.12815	0.00795966	√	3.25394	3.38361	3.05481	3.41405	3.66925	3.85116	24	24	1060.8
Q14155-1	Isoform 1 of Rho guanine nucleotide exchange factor 7	ARHGEF7	ARHG7_HUMAN	0.173208	1.12756	0.0119507		0.0703655	0.0796381	0.069059	0.0839016	0.0803041	0.0828012	2	2	73.63
O95782-2	Isoform B of AP-2 complex subunit alpha-1	AP2A1	AP2A1_HUMAN	0.173117	1.12749	0.0098988	√	4.21511	4.11843	3.64813	4.40275	4.46202	4.64445	21	13	1000.54
P02751-17	Isoform 17 of Fibronectin	FN1	FINC_HUMAN	0.172891	1.12732	0.0211316		41.4065	46.949	42.0668	45.6434	50.4813	50.9024	53	53	2817.05
Q15274	Nicotinate-nucleotide pyrophosphorylase [carboxylating]	QPRT	NADC_HUMAN	0.172773	1.12722	0.00871838	√	8.35546	8.33025	7.53268	9.46098	8.89439	8.94415	6	6	330.42
Q9BT43	DNA-directed RNA polymerase III subunit RPC7-like	POLR3GL	RPC7L_HUMAN	0.171824	1.12648	0.370609		0.0181072	0.0181268	0.0277122	0.0283649	0.022268	0.0214014	1	1	34.46
P49327	Fatty acid synthase	FASN	FAS_HUMAN	0.171472	1.12621	0.00642045	√	449.131	414.913	401.885	460.803	473.324	491.571	127	121	6552.88
Q13506-2	Isoform Short of NGFI-A-binding protein 1	NAB1	NAB1_HUMAN	0.171395	1.12615	0.286861		0.142901	0.129447	0.124048	0.176101	0.116527	0.153772	2	2	93.59
Q5BJD5-3	Isoform 3 of Transmembrane protein 41B	TMEM41B	TM41B_HUMAN	0.170945	1.1258	0.0759417		0.202684	0.202528	0.160711	0.214477	0.199784	0.222852	1	1	39.24
Q9ULR0	Pre-mRNA-splicing factor ISY1 homolog	ISY1	ISY1_HUMAN	0.170922	1.12578	0.38915		0.441017	0.476346	0.629652	0.642344	0.643907	0.455344	2	2	124.35
Q8NBN7	Retinol dehydrogenase 13	RDH13	RDH13_HUMAN	0.170054	1.1251	0.0310778		0.433044	0.384991	0.375852	0.461928	0.450657	0.430659	4	4	148.64
Q06830	Peroxiredoxin-1	PRDX1	PRDX1_HUMAN	0.169778	1.12489	0.00574175	√	125.384	128.376	115.255	134.287	133.746	147.068	18	16	861.41
Q8NFQ8	Torsin-1A-interacting protein 2	TOR1AIP2	TOIP2_HUMAN	0.169634	1.12477	0.50067		0.104578	0.10264	0.114941	0.125271	0.082694	0.154391	2	1	110.52
P34913	Bifunctional epoxide hydrolase 2	EPHX2	HYES_HUMAN	0.169329	1.12454	0.114602		1.94219	2.30885	2.21783	2.1181	2.49923	2.65714	10	9	381.36
P55145	Mesencephalic astrocyte-derived neurotrophic factor	MANF	MANF_HUMAN	0.169307	1.12452	0.415531		22.2241	19.8771	29.4825	29.7796	29.8919	20.8257	14	12	645.29
Q9C0B1	Alpha-ketoglutarate-dependent dioxygenase FTO	FTO	FTO_HUMAN	0.169291	1.12451	0.0286532		0.915728	0.902103	0.8282	1.05314	0.99007	0.932272	8	7	314.28
P35237	Serpin B6	SERPINB6	SPB6_HUMAN	0.168785	1.12411	0.0169138		4.18677	4.38584	3.98897	4.63103	4.36291	5.12667	14	14	673.82
P29279	Connective tissue growth factor	CTGF	CTGF_HUMAN	0.168772	1.1241	0.110782		22.2735	23.5427	27.5435	29.1077	27.1645	26.1916	14	14	647.75
Q9UL46	Proteasome activator complex subunit 2	PSME2	PSME2_HUMAN	0.168096	1.12357	0.0461142		5.98614	5.79611	6.24906	7.0031	6.99615	6.26027	12	12	541.15
Q6IAA8	Ragulator complex protein LAMTOR1	LAMTOR1	LTOR1_HUMAN	0.16736	1.123	0.224584		0.374742	0.402897	0.388175	0.505098	0.351665	0.452448	2	2	143.32
P49419-2	Isoform 2 of Alpha-aminoadipic semialdehyde dehydrogenase	ALDH7A1	AL7A1_HUMAN	0.16695	1.12268	0.0123234		37.1866	40.0307	35.1544	39.5482	42.4811	44.1284	24	21	1159.38
Q13263	Transcription intermediary factor 1-beta	TRIM28	TIF1B_HUMAN	0.166696	1.12248	0.0607526		39.7249	42.7238	40.2882	41.5665	50.692	45.5119	31	27	1523.79
P52758	Ribonuclease UK114	HRSP12	UK114_HUMAN	0.166675	1.12247	0.390059		1.08432	0.850297	1.37931	1.46418	1.1887	1.06691	3	3	134
Q8NE01	Metal transporter CNNM3	CNNM3	CNNM3_HUMAN	0.165652	1.12167	0.0487532		0.31223	0.336846	0.28438	0.327041	0.375681	0.344311	4	3	153.88
P22413	Ectonucleotide pyrophosphatase/phosphodiesterase family member 1	ENPP1	ENPP1_HUMAN	0.165289	1.12139	0.159956		2.52659	3.05549	3.23768	3.15553	3.61346	3.12141	13	13	633.11
Q9H0U9	Testis-specific Y-encoded-like protein 1	TSPYL1	TSYL1_HUMAN	0.165082	1.12123	0.613459		0.0603823	0.0988296	0.111736	0.0644622	0.12796	0.111372	1	1	18.43
P08243-3	Isoform 3 of Asparagine synthetase [glutamine-hydrolyzing]	ASNS	ASNS_HUMAN	0.163734	1.12018	0.0124748		5.57876	6.1341	5.2137	6.32295	6.1563	6.48159	15	15	707.64
Q8N2F6-4	Isoform 4 of Armadillo repeat-containing protein 10	ARMC10	ARM10_HUMAN	0.163694	1.12015	0.184985		0.0934666	0.124403	0.0951078	0.115152	0.103987	0.131443	3	2	141.2
Q8TB61-3	Isoform 3 of Adenosine 3'-phospho 5'-phosphosulfate transporter 1	SLC35B2	S35B2_HUMAN	0.163329	1.11987	0.0365278		1.61534	1.48293	1.35582	1.74263	1.59532	1.65003	5	5	176.14
P14543-2	Isoform 2 of Nidogen-1	NID1	NID1_HUMAN	0.163191	1.11976	0.133811		0.418314	0.344054	0.361688	0.455835	0.369582	0.433258	3	3	142.02
O75191	Xylulose kinase	XYLB	XYLB_HUMAN	0.163023	1.11963	0.0375333		1.0421	1.20235	1.03427	1.14443	1.20645	1.32008	6	5	273.47
P35250	Replication factor C subunit 2	RFC2	RFC2_HUMAN	0.162984	1.1196	0.00810502	√	2.80314	2.78715	2.48272	2.99891	3.04498	2.99467	8	8	556.53
O75150	E3 ubiquitin-protein ligase BRE1B	RNF40	BRE1B_HUMAN	0.162661	1.11935	0.0788845		0.700184	0.671824	0.625582	0.720758	0.826201	0.689044	8	7	271.25
P32121-5	Isoform 5 of Beta-arrestin-2	ARRB2	ARRB2_HUMAN	0.162281	1.11905	0.193021		0.228459	0.208458	0.170532	0.256326	0.205225	0.218218	3	2	105.17
Q5JTZ9	Alanine--tRNA ligase, mitochondrial	AARS2	SYAM_HUMAN	0.161895	1.11876	0.016054		0.449243	0.400951	0.39992	0.474829	0.454919	0.468824	6	5	338.18
P61225	Ras-related protein Rap-2b	RAP2B	RAP2B_HUMAN	0.161599	1.11853	0.453833		0.410922	0.602559	0.477004	0.502406	0.436209	0.728531	2	2	108.78
Q8TAA5	GrpE protein homolog 2, mitochondrial	GR	GRPE2_HUMAN	0.161282	1.11828	0.550996		0.030029	0.0484163	0.027604	0.0531023	0.0286737	0.0368167	1	1	43.86
H3BR10	Small leucine-rich protein 1	SMLR1	SMLR1_HUMAN	0.161061	1.11811	0.202163		1.38686	1.28109	1.50994	1.63497	1.69988	1.3365	1	1	96.33
Q7L576;Q96F07-2	Cytoplasmic FMR1-interacting protein 1	CYFIP1	CYFP1_HUMAN	0.159841	1.11716	0.282678		2.64743	2.34243	2.42904	3.32816	2.64137	2.31861	13	13	631.51
Q96SB4	SRSF protein kinase 1	SRPK1	SRPK1_HUMAN	0.159805	1.11714	0.150123		6.5405	6.89887	6.01021	6.35906	8.32668	7.04209	11	9	391.8
Q9Y5L3	Ectonucleoside triphosphate diphosphohydrolase 2	ENTPD2	ENTP2_HUMAN	0.159705	1.11706	0.338675		0.16604	0.206919	0.178709	0.15764	0.219113	0.239493	3	3	137.06
Q9Y6N5	Sulfide:quinone oxidoreductase, mitochondrial	SQRDL	SQRD_HUMAN	0.159695	1.11705	0.0878639		1.63751	1.63498	1.39229	1.66638	1.58516	1.95926	6	6	358.66
Q16186	Proteasomal ubiquitin receptor ADRM1	ADRM1	ADRM1_HUMAN	0.159682	1.11704	0.141622		2.17161	2.45438	2.42029	2.48371	2.98447	2.40281	5	5	150.68
P53365-2	Isoform 2 of Arfaptin-2	ARFIP2	ARFP2_HUMAN	0.158952	1.11648	0.165388		0.379051	0.341188	0.408226	0.463755	0.419349	0.3768	1	1	25.48
P18615	Negative elongation factor E	NELFE	NELFE_HUMAN	0.158656	1.11625	0.330181		0.599543	0.583383	0.727757	0.684912	0.850613	0.597268	3	3	184.19
Q9H3G5	Probable serine carboxypeptidase CPVL	CPVL	CPVL_HUMAN	0.158267	1.11595	0.0291057		2.89097	3.13096	2.93956	3.3416	3.03718	3.62175	10	9	525.53
P40222	Alpha-taxilin	TXLNA	TXLNA_HUMAN	0.158173	1.11587	0.519898		2.80626	2.1258	2.89743	2.92639	3.68838	2.12194	13	10	599.05
Q02040	A-kinase anchor protein 17A	AKAP17A	AK17A_HUMAN	0.158119	1.11583	0.266625		0.0416607	0.0465124	0.0302643	0.0418216	0.048773	0.0415615	2	1	52.02
O75348	V-type proton ATPase subunit G 1	ATP6V1G1	VATG1_HUMAN	0.157925	1.11568	0.355077		2.56508	2.16128	2.84159	3.27271	2.88863	2.28207	4	4	162.56
Q08380	Galectin-3-binding protein	LGALS3BP	LG3BP_HUMAN	0.157865	1.11563	0.00800828	√	4.90075	5.23148	5.32235	5.72209	5.7681	5.75147	15	13	698.88
P14618	Pyruvate kinase PKM	PKM	KPYM_HUMAN	0.157125	1.11506	0.0169207		169.734	163.305	149.245	169.587	184.911	183.28	45	39	2501.37
P61020	Ras-related protein Rab-5B	RAB5B	RAB5B_HUMAN	0.157055	1.11501	0.00657542	√	1.83226	1.95927	1.8604	2.01585	2.03602	2.25007	7	3	413.14
Q14980-2	Isoform 2 of Nuclear mitotic apparatus protein 1	NUMA1	NUMA1_HUMAN	0.157035	1.11499	0.0432788		9.75809	9.29436	9.53738	10.6625	11.3329	9.88204	47	46	2807.33
Q9Y666	Solute carrier family 12 member 7	SLC12A7	S12A7_HUMAN	0.156406	1.11451	0.415602		0.153506	0.204972	0.154483	0.142526	0.224307	0.204865	3	3	132.71
P98194-2	Isoform 2 of Calcium-transporting ATPase type 2C member 1	ATP2C1	AT2C1_HUMAN	0.156159	1.11432	0.0331929		0.113914	0.128313	0.108139	0.124239	0.126371	0.139808	2	2	97.55
O14548	Cytochrome c oxidase subunit 7A-related protein, mitochondrial	COX7A2L	COX7R_HUMAN	0.156106	1.11428	0.73612		0.463557	0.729947	0.810215	0.445115	1.10743	0.680151	2	2	31.65
Q6UWU4	Bombesin receptor-activated protein C6orf89	C6orf89	CF089_HUMAN	0.155433	1.11376	0.0863949		0.137287	0.139914	0.114566	0.154984	0.132669	0.14868	1	1	17.61
P35754	Glutaredoxin-1	GLRX	GLRX1_HUMAN	0.155423	1.11375	0.480726		4.94253	4.33813	5.99326	7.17555	5.47921	4.35654	3	3	258.34
Q9H6V9	UPF0554 protein C2orf43	C2orf43	CB043_HUMAN	0.155405	1.11373	0.0341542		0.465871	0.507326	0.447617	0.535332	0.550888	0.49619	2	2	122.99
Q99470	Stromal cell-derived factor 2	SDF2	SDF2_HUMAN	0.155144	1.11353	0.107898		0.459457	0.576353	0.472582	0.510005	0.580336	0.589303	2	2	87.88
P46926	Glucosamine-6-phosphate isomerase 1	GNPDA1	GNPI1_HUMAN	0.154341	1.11291	0.0906776		1.43588	1.49673	1.31393	1.5845	1.38038	1.76116	6	5	261.79
Q9UHN6	Transmembrane protein 2	TMEM2	TMEM2_HUMAN	0.154068	1.1127	0.130977		0.499291	0.505374	0.445902	0.557749	0.457683	0.598619	5	5	235.91
Q9Y639-1	Isoform 1 of Neuroplastin	NPTN	NPTN_HUMAN	0.154052	1.11269	0.313545		2.73743	2.6212	3.1842	3.54036	3.38506	2.58009	6	6	328.94
P48059	LIM and senescent cell antigen-like-containing domain protein 1	LIMS1	LIMS1_HUMAN	0.153908	1.11258	0.0418587		0.405688	0.371967	0.361896	0.437129	0.384219	0.446492	2	2	43.97
Q14696	LDLR chaperone MESD	MESDC2	MESD_HUMAN	0.153603	1.11234	0.105016		4.47332	4.07363	4.33975	4.65944	5.29428	4.38074	7	7	314.62
Q13564-3	Isoform 3 of NEDD8-activating enzyme E1 regulatory subunit	NAE1	ULA1_HUMAN	0.153584	1.11233	0.222205		0.491761	0.435087	0.325543	0.459374	0.442326	0.491372	5	5	233.81
P00966	Argininosuccinate synthase	ASS1	ASSY_HUMAN	0.15352	1.11228	0.053135		0.880404	0.93664	0.815911	0.961035	0.887554	1.08	6	6	249.59
Q9NTG7	NAD-dependent protein deacetylase sirtuin-3, mitochondrial	SIRT3	SIR3_HUMAN	0.153432	1.11221	0.204204		1.53678	1.20794	1.17323	1.60367	1.29099	1.46293	2	2	97.16
O75976	Carboxypeptidase D	CPD	CBPD_HUMAN	0.152573	1.11155	0.00780461	√	2.85336	2.62701	2.76447	3.04844	3.0378	3.07831	17	17	722.82
Q9H2V7-3	Isoform 3 of Protein spinster homolog 1	SPNS1	SPNS1_HUMAN	0.15236	1.11139	0.409071		0.238931	0.253427	0.192433	0.212333	0.323208	0.225526	2	2	81.72
O75352	Mannose-P-dolichol utilization defect 1 protein	MPDU1	MPU1_HUMAN	0.152287	1.11133	0.00969341	√	1.61828	1.73941	1.5944	1.72114	1.85229	1.92996	3	3	143.47
P53985	Monocarboxylate transporter 1	SLC16A1	MOT1_HUMAN	0.152141	1.11122	0.281627		2.66906	2.53726	2.2108	2.39627	3.32595	2.51982	6	6	315.97
Q9BTW9	Tubulin-specific chaperone D	TBCD	TBCD_HUMAN	0.151973	1.11109	0.0231862		3.29822	3.23368	2.98862	3.24849	3.56358	3.76605	21	21	842.1
Q96HV5	Transmembrane protein 41A	TMEM41A	TM41A_HUMAN	0.151413	1.11066	0.494783		0.228238	0.31978	0.276595	0.216224	0.337085	0.362553	2	2	114.54
Q9NXF7	DDB1- and CUL4-associated factor 16	DCAF16	DCA16_HUMAN	0.15137	1.11062	0.204132		0.0584071	0.0555471	0.0562805	0.0723795	0.0523343	0.0643531	1	1	58.03
Q13586	Stromal interaction molecule 1	STIM1	STIM1_HUMAN	0.151211	1.1105	0.0651402		2.23397	2.12893	1.89366	2.40665	2.38416	2.1571	11	11	525.75
P51572	B-cell receptor-associated protein 31	BCAP31	BAP31_HUMAN	0.151051	1.11038	0.10476		20.0385	20.4688	19.3671	21.5681	24.8422	20.0728	17	17	879.92
Q9BX68	Histidine triad nucleotide-binding protein 2, mitochondrial	HINT2	HINT2_HUMAN	0.150832	1.11021	0.30187		1.37444	1.45622	1.66316	1.82778	1.79886	1.36244	3	3	137.91
Q96B54	Zinc finger protein 428	ZNF428	ZN428_HUMAN	0.149738	1.10937	0.564739		0.182082	0.159344	0.249027	0.271863	0.228762	0.154405	2	2	74.52
Q9NVV0	Trimeric intracellular cation channel type B	TMEM38B	TM38B_HUMAN	0.149484	1.10917	0.0746539		0.495792	0.514393	0.43135	0.481175	0.542986	0.574751	1	1	41.24
O15320-8	Isoform 9 of cTAGE family member 5	CTAGE5	CTGE5_HUMAN	0.148866	1.1087	0.117598		0.890652	0.879893	0.869887	0.909948	1.11043	0.907062	10	10	490.81
Q7L9B9	Endonuclease/exonuclease/phosphatase family domain-containing protein 1	EEPD1	EEPD1_HUMAN	0.148767	1.10862	0.165698		0.145284	0.155442	0.113498	0.151366	0.141601	0.166251	2	2	83.99
Q9BSD7	Cancer-related nucleoside-triphosphatase	NTPCR	NTPCR_HUMAN	0.148109	1.10812	0.0917559		0.663549	0.54193	0.621586	0.656142	0.651238	0.717221	6	5	223.43
Q9BWH6-2	Isoform 2 of RNA polymerase II-associated protein 1	RPAP1	RPAP1_HUMAN	0.148068	1.10808	0.548009		0.0267663	0.0139383	0.0216015	0.0273165	0.0248072	0.0169168	1	1	34.35
Q96GK7	Fumarylacetoacetate hydrolase domain-containing protein 2A	FAHD2A	FAH2A_HUMAN	0.147929	1.10798	0.138507		1.37369	1.55158	1.23522	1.5079	1.36913	1.7327	4	4	206.91
Q9UBQ0	Vacuolar protein sorting-associated protein 29	VPS29	VPS29_HUMAN	0.147883	1.10794	0.0885589		1.63253	1.3972	1.29837	1.65591	1.58814	1.55125	6	6	237.15
O15111	Inhibitor of nuclear factor kappa-B kinase subunit alpha	CHUK	IKKA_HUMAN	0.14783	1.1079	0.00291359	√	0.135382	0.136049	0.136986	0.143923	0.15144	0.157122	3	3	161.77
Q99798	Aconitate hydratase, mitochondrial	ACO2	ACON_HUMAN	0.147811	1.10789	0.0252227		25.7538	28.5412	25.3906	27.3198	30.0949	30.8679	38	36	1770.07
P27694	Replication protein A 70 kDa DNA-binding subunit	RPA1	RFA1_HUMAN	0.147602	1.10773	0.0137494		4.98942	5.07702	4.5726	5.17099	5.22602	5.81905	15	15	766.62
Q9H078-3	Isoform 3 of Caseinolytic peptidase B protein homolog	CLPB	CLPB_HUMAN	0.147016	1.10728	0.032014		1.17256	1.18294	0.995085	1.20578	1.22435	1.27991	7	7	214.72
Q6P1A2-2	Isoform 2 of Lysophospholipid acyltransferase 5	LPCAT3	MBOA5_HUMAN	0.146672	1.10701	0.0777083		0.80305	0.91022	0.830972	0.846977	0.922163	1.04737	2	2	82.82
P31946-2	Isoform Short of 14-3-3 protein beta/alpha	YWHAB	1433B_HUMAN	0.146424	1.10682	0.117211		33.9858	30.5343	31.7803	35.2777	39.0977	32.2121	18	7	798.11
Q9Y530	O-acetyl-ADP-ribose deacetylase 1	OARD1	OARD1_HUMAN	0.146392	1.1068	0.0424153		0.129343	0.123988	0.119343	0.149345	0.129238	0.133893	1	1	68.18
P20933	N(4)-(beta-N-acetylglucosaminyl)-L-asparaginase	AGA	ASPG_HUMAN	0.145967	1.10647	0.983837		0.320778	0.343146	0.52324	0.654062	0.15635	0.503151	2	2	100.51
O60701	UDP-glucose 6-dehydrogenase	UGDH	UGDH_HUMAN	0.145637	1.10622	0.0306745		219.788	240.219	214.485	229.469	259.981	256.686	42	40	2241.16
O14957	Cytochrome b-c1 complex subunit 10	UQCR11	QCR10_HUMAN	0.14549	1.10611	0.380513		0.296451	0.420323	0.453876	0.390756	0.388863	0.515245	1	1	61.6
Q9NPF5	DNA methyltransferase 1-associated protein 1	DMAP1	DMAP1_HUMAN	0.14478	1.10556	0.0515512		0.271655	0.285636	0.296804	0.296975	0.338134	0.309146	3	3	118.45
P13473	Lysosome-associated membrane glycoprotein 2	LAMP2	LAMP2_HUMAN	0.144204	1.10512	0.32818		5.3241	4.39497	6.1945	6.77851	5.431	5.37691	5	5	286.01
O00170	AH receptor-interacting protein	AIP	AIP_HUMAN	0.143982	1.10495	0.0670705		1.46656	1.26982	1.33531	1.60213	1.41828	1.47861	7	7	258.09
Q12792-4	Isoform 4 of Twinfilin-1	TWF1	TWF1_HUMAN	0.14384	1.10484	0.153975		2.3157	1.91281	1.77632	2.18309	2.35856	2.09274	10	9	384.97
O96017-12	Isoform 12 of Serine/threonine-protein kinase Chk2	CHEK2	CHK2_HUMAN	0.1437	1.10474	0.136826		0.124781	0.11858	0.0940402	0.127723	0.125175	0.119842	2	2	51.46
P23258	Tubulin gamma-1 chain	TUBG1	TBG1_HUMAN	0.143533	1.10461	0.009402	√	2.02213	2.24413	2.07482	2.23685	2.36092	2.40663	6	5	252.87
P36551	Oxygen-dependent coproporphyrinogen-III oxidase, mitochondrial	CPOX	HEM6_HUMAN	0.14331	1.10444	0.0361212		3.88217	3.87524	3.7415	4.35036	3.80703	4.54242	16	16	632.44
Q8IZ21-3	Isoform 3 of Phosphatase and actin regulator 4	PHACTR4	PHAR4_HUMAN	0.142949	1.10416	0.216131		0.210994	0.227017	0.2395	0.245028	0.285054	0.217998	3	3	142.5
O15427	Monocarboxylate transporter 4	SLC16A3	MOT4_HUMAN	0.142909	1.10413	0.0679679		8.19571	7.70465	7.32304	7.92779	9.33834	8.37551	9	8	365.95
O00625	Pirin	PIR	PIR_HUMAN	0.142593	1.10389	0.27026		0.423171	0.351054	0.410151	0.447622	0.360044	0.499753	6	6	235.14
Q92520	Protein FAM3C	FAM3C	FAM3C_HUMAN	0.142256	1.10363	0.129704		3.71783	3.54389	4.2721	4.53832	4.11731	4.07343	6	6	334.8
Q9H6R3	Acyl-CoA synthetase short-chain family member 3, mitochondrial	ACSS3	ACSS3_HUMAN	0.1422	1.10359	0.136215		8.9562	10.3736	8.95772	9.1066	11.3814	10.7297	20	20	1039.38
O15127	Secretory carrier-associated membrane protein 2	SCAMP2	SCAM2_HUMAN	0.142047	1.10347	0.0391385		3.45017	3.45785	2.94858	3.76797	3.4984	3.61009	3	3	184.79
P29401	Transketolase	TKT	TKT_HUMAN	0.141753	1.10324	0.0598536		45.8522	41.8049	38.2084	44.4408	48.7865	45.6331	27	25	1378.77
Q9BYG5	Partitioning defective 6 homolog beta	PARD6B	PAR6B_HUMAN	0.141736	1.10323	0.44756		0.396574	0.344431	0.3081	0.48852	0.36073	0.308156	3	3	141.79
Q9NPJ3-2	Isoform 2 of Acyl-coenzyme A thioesterase 13	ACOT13	ACO13_HUMAN	0.141687	1.10319	0.00882467	√	2.10656	2.15771	1.91854	2.30016	2.17184	2.34885	4	4	261.9
P03923	NADH-ubiquinone oxidoreductase chain 6	MT-ND6	NU6M_HUMAN	0.140782	1.1025	0.00946794		0.559349	0.527448	0.519526	0.610732	0.564302	0.595941	1	1	51.53
Q12959-8	Isoform 8 of Disks large homolog 1	DLG1	DLG1_HUMAN	0.14076	1.10249	0.155659		0.479052	0.488656	0.440056	0.472289	0.594321	0.48543	5	5	155.93
Q9Y487	V-type proton ATPase 116 kDa subunit a isoform 2	ATP6V0A2	VPP2_HUMAN	0.140529	1.10231	0.0941146		0.221365	0.222598	0.225749	0.228469	0.227132	0.282629	3	3	161.64
Q02750	Dual specificity mitogen-activated protein kinase kinase 1	MAP2K1	MP2K1_HUMAN	0.139689	1.10167	0.213741		0.473563	0.445476	0.370756	0.502927	0.503116	0.414882	11	3	434.41
Q96AQ8	Mitochondrial calcium uniporter regulator 1	MCUR1	MCUR1_HUMAN	0.139521	1.10154	0.23108		0.113734	0.115842	0.0855151	0.12412	0.101666	0.121298	2	2	62.98
Q86Y39	NADH dehydrogenase [ubiquinone] 1 alpha subcomplex subunit 11	NDUFA11	NDUAB_HUMAN	0.139309	1.10138	0.105202		3.58952	3.38017	3.03326	3.46572	4.04136	3.50994	3	3	185.71
Q99523	Sortilin	SORT1	SORT_HUMAN	0.139006	1.10115	0.216245		0.794043	0.877574	0.819765	0.853824	0.792726	1.09683	4	4	143.29
Q8WU67	Abhydrolase domain-containing protein 3	ABHD3	ABHD3_HUMAN	0.138981	1.10113	0.446109		0.0513517	0.0481229	0.0566178	0.0652989	0.0421656	0.064413	1	1	41.13
Q13557-12	Isoform Delta 12 of Calcium/calmodulin-dependent protein kinase type II subunit delta	CAMK2D	KCC2D_HUMAN	0.13871	1.10092	0.115528		1.93091	2.17984	2.16751	2.03228	2.41825	2.46134	11	7	485.47
Q9NVA2	Septin-11	SEP11	SEP11_HUMAN	0.138328	1.10063	0.375874		0.618836	0.559893	0.52114	0.565787	0.775304	0.529833	5	3	207.65
Q9H4L5-4	Isoform 1d of Oxysterol-binding protein-related protein 3	OSBPL3	OSBL3_HUMAN	0.138104	1.10046	0.261454		0.426505	0.478243	0.534121	0.443392	0.571292	0.56873	3	3	109.04
P32321	Deoxycytidylate deaminase	DCTD	DCTD_HUMAN	0.137287	1.09983	0.0665662		0.130476	0.121593	0.117445	0.144152	0.1217	0.140551	3	2	117.92
P61966	AP-1 complex subunit sigma-1A	AP1S1	AP1S1_HUMAN	0.137036	1.09964	0.438833		0.588128	0.751057	0.645857	0.582568	0.916756	0.683515	3	3	165.68
Q15269	Periodic tryptophan protein 2 homolog	PWP2	PWP2_HUMAN	0.136546	1.09927	0.0361982		4.0817	4.1551	4.04612	4.48871	4.78881	4.22472	9	9	378.17
Q86UP2	Kinectin	KTN1	KTN1_HUMAN	0.136344	1.09912	0.0443942		4.14998	3.86533	4.12354	4.62327	4.51178	4.20696	26	26	1307.34
Q9NX61-2	Isoform 2 of Transmembrane protein 161A	TMEM161A	T161A_HUMAN	0.136313	1.09909	0.583074		0.0532604	0.056514	0.0708511	0.0451097	0.0805106	0.0729039	2	1	60.7
Q9P0K7-4	Isoform 4 of Ankycorbin	RAI14	RAI14_HUMAN	0.136122	1.09895	0.71051		0.0119559	0.00980945	0.00456062	0.0142542	0.00581838	0.0088582	1	1	23.22
Q9NRV9	Heme-binding protein 1	HEBP1	HEBP1_HUMAN	0.135633	1.09857	0.483295		0.139204	0.165026	0.236292	0.159431	0.194367	0.240005	2	2	51.65
Q8N4V1	Membrane magnesium transporter 1	MMGT1	MMGT1_HUMAN	0.135586	1.09854	0.110173		0.057281	0.0606343	0.0686334	0.0695918	0.0632476	0.0720917	1	1	30.9
Q9Y6X4	Soluble lamin-associated protein of 75 kDa	FAM169A	F169A_HUMAN	0.135456	1.09844	0.0095364	√	1.55444	1.69174	1.63986	1.71932	1.82224	1.82547	7	7	361.14
P39748	Flap endonuclease 1	FEN1	FEN1_HUMAN	0.135389	1.09839	0.0410738		13.1767	14.4559	14.1861	14.3526	16.2195	15.3611	14	13	670.7
Q86V21	Acetoacetyl-CoA synthetase	AACS	AACS_HUMAN	0.135232	1.09827	0.0442905		2.48552	2.4609	2.23442	2.69044	2.38775	2.80829	8	8	266.64
Q15370	Transcription elongation factor B polypeptide 2	TCEB2	ELOB_HUMAN	0.135108	1.09817	0.264536		2.12971	2.2052	2.29277	2.70623	2.55253	2.01958	4	4	227.98
Q8N6R0-1	Isoform 4 of Methyltransferase-like protein 13	METTL13	MET13_HUMAN	0.135082	1.09815	0.396353		0.108112	0.154179	0.13448	0.117326	0.144656	0.173733	2	2	90.96
O95487-2	Isoform 2 of Protein transport protein Sec24B	SEC24B	SC24B_HUMAN	0.134946	1.09805	0.385499		0.189945	0.201269	0.184833	0.165456	0.257205	0.209869	4	3	184.4
Q8WUM9	Sodium-dependent phosphate transporter 1	SLC20A1	S20A1_HUMAN	0.134938	1.09805	0.356766		0.108569	0.0976998	0.0887681	0.100546	0.13167	0.0917471	1	1	50.91
O75396	Vesicle-trafficking protein SEC22b	SEC22B	SC22B_HUMAN	0.134921	1.09803	0.0163343		7.41719	7.81231	6.68552	7.84188	7.98977	8.23177	8	7	446.38
Q14534	Squalene monooxygenase	SQLE	ERG1_HUMAN	0.134636	1.09782	0.047192		1.49443	1.32628	1.274	1.53635	1.41771	1.54119	9	8	380.62
Q92538	Golgi-specific brefeldin A-resistance guanine nucleotide exchange factor 1	GBF1	GBF1_HUMAN	0.134524	1.09773	0.0556064		2.07136	2.31836	2.20597	2.21283	2.39789	2.62957	19	19	881.84
Q92544	Transmembrane 9 superfamily member 4	TM9SF4	TM9S4_HUMAN	0.134139	1.09744	0.0353105		10.543	11.6989	10.4044	11.0352	12.2123	12.5798	13	13	601.87
P51858	Hepatoma-derived growth factor	HDGF	HDGF_HUMAN	0.133582	1.09701	0.944555		9.11813	9.5285	12.8669	7.93713	20.012	6.62163	12	12	426.39
O60763	General vesicular transport factor p115	USO1	USO1_HUMAN	0.132875	1.09648	0.0013348	√	7.2006	7.28606	6.74852	7.53601	7.80338	7.94449	21	21	1213.98
O75381-2	Isoform 2 of Peroxisomal membrane protein PEX14	PEX14	PEX14_HUMAN	0.132865	1.09647	0.418909		5.07728	5.52554	6.9341	6.72122	7.33171	5.17574	9	9	464.59
P62312	U6 snRNA-associated Sm-like protein LSm6	LSM6	LSM6_HUMAN	0.132682	1.09633	0.260452		0.265194	0.20051	0.239288	0.289449	0.241436	0.242018	3	3	103.95
Q7Z4V5;Q7Z4V5-3	Hepatoma-derived growth factor-related protein 2	HDGFRP2	HDGR2_HUMAN	0.132277	1.09602	0.563396		0.907556	0.806274	1.08038	1.0958	1.23684	0.729867	5	5	223.94
Q9BSJ2	Gamma-tubulin complex component 2	TUBGCP2	GCP2_HUMAN	0.132123	1.09591	0.110497		0.056662	0.0567593	0.0598438	0.0606523	0.070165	0.0590647	3	3	100.22
P56556	NADH dehydrogenase [ubiquinone] 1 alpha subcomplex subunit 6	NDUFA6	NDUA6_HUMAN	0.131819	1.09567	0.147186		2.9305	2.74366	2.98758	3.31063	3.36663	2.81319	4	4	227.01
Q9GZU8	Protein FAM192A	FAM192A	F192A_HUMAN	0.131595	1.0955	0.545407		0.415239	0.287596	0.366453	0.453626	0.433906	0.283878	2	2	155.33
Q15738	Sterol-4-alpha-carboxylate 3-dehydrogenase, decarboxylating	NSDHL	NSDHL_HUMAN	0.131412	1.09537	0.118529		7.36074	7.73375	6.86705	7.6185	7.23223	9.20518	9	9	414.71
Q15648-3	Isoform 2 of Mediator of RNA polymerase II transcription subunit 1	MED1	MED1_HUMAN	0.131387	1.09535	0.32086		0.0151962	0.0213534	0.0223452	0.0227385	0.0194512	0.0223205	1	1	20.87
Q9BV86	N-terminal Xaa-Pro-Lys N-methyltransferase 1	NTMT1	NTM1A_HUMAN	0.131187	1.09519	0.0225736		1.71207	1.87926	1.79796	1.96384	2.03615	1.90233	5	5	257.14
Q9BST9-3	Isoform 3 of Rhotekin	RTKN	RTKN_HUMAN	0.131032	1.09508	0.0805005		0.537839	0.616981	0.544287	0.561617	0.623704	0.675331	2	2	55.89
Q96GW9	Methionine--tRNA ligase, mitochondrial	MARS2	SYMM_HUMAN	0.130802	1.0949	0.00961647	√	0.48586	0.525405	0.498993	0.524708	0.546223	0.582655	5	4	282.93
Q96SZ5	2-aminoethanethiol dioxygenase	ADO	AEDO_HUMAN	0.130233	1.09447	0.388053		0.00785785	0.00820276	0.00894324	0.011019	0.0072475	0.0090995	1	1	22.76
P21291	Cysteine and glycine-rich protein 1	CSRP1	CSRP1_HUMAN	0.130075	1.09435	0.0271768		4.66533	4.39298	4.2275	5.00524	4.49645	5.03765	6	6	254.9
Q9NQS1	Cell death regulator Aven	AVEN	AVEN_HUMAN	0.129543	1.09395	0.708408		0.123753	0.122621	0.193247	0.132524	0.234002	0.114396	1	1	61.4
P35670-2	Isoform 2 of Copper-transporting ATPase 2	ATP7B	ATP7B_HUMAN	0.129078	1.09359	0.333058		0.0359973	0.0341619	0.0233903	0.0352711	0.0360225	0.0310116	1	1	73.75
Q9NUI1	Peroxisomal 2,4-dienoyl-CoA reductase	DECR2	DECR2_HUMAN	0.129029	1.09356	0.25436		0.860488	0.951286	0.718222	0.968104	0.781316	1.01728	4	4	170.88
Q9UFG5	UPF0449 protein C19orf25	C19orf25	CS025_HUMAN	0.128873	1.09344	0.556915		0.249998	0.212448	0.506409	0.375953	0.410713	0.272719	2	2	70.91
P49407-2	Isoform 1B of Beta-arrestin-1	ARRB1	ARRB1_HUMAN	0.12881	1.09339	0.165704		0.0829648	0.0848884	0.0798931	0.0762835	0.0965377	0.0980626	3	2	78.8
Q9Y3C4	EKC/KEOPS complex subunit TPRKB	TPRKB	TPRKB_HUMAN	0.128468	1.09313	0.00340919	√	0.538238	0.565709	0.508081	0.586434	0.586244	0.589482	4	4	191.17
Q9HD42	Charged multivesicular body protein 1a	CHMP1A	CHM1A_HUMAN	0.128449	1.09312	0.26562		0.890752	0.814299	0.967005	1.12138	0.933075	0.866419	2	2	96.48
Q15526-2	Isoform 2 of Surfeit locus protein 1	SURF1	SURF1_HUMAN	0.128329	1.09303	0.235065		0.632026	0.737203	0.519611	0.636144	0.660382	0.768027	2	2	79.09
P21281	V-type proton ATPase subunit B, brain isoform	ATP6V1B2	VATB2_HUMAN	0.128272	1.09298	0.0182776		10.5875	10.7992	9.35456	10.9012	11.1775	11.521	21	20	957.76
Q9NWU1-2	Isoform 2 of 3-oxoacyl-[acyl-carrier-protein] synthase, mitochondrial	OXSM	OXSM_HUMAN	0.12788	1.09269	0.42648		0.388601	0.490023	0.513242	0.402031	0.59946	0.519384	5	4	207.4
Q9Y6N7-6	Isoform 6 of Roundabout homolog 1	ROBO1	ROBO1_HUMAN	0.12788	1.09269	0.558931		0.0607901	0.0450182	0.0332116	0.0509664	0.0371867	0.0637522	1	1	35.87
O14681	Etoposide-induced protein 2.4 homolog	EI24	EI24_HUMAN	0.127726	1.09257	0.167309		0.122635	0.116809	0.108237	0.119633	0.11273	0.147503	1	1	34.85
O76095-2	Isoform 2 of Protein JTB	JTB	JTB_HUMAN	0.127707	1.09256	0.34316		0.398207	0.339376	0.429398	0.47323	0.445384	0.356378	1	1	45.73
P18031	Tyrosine-protein phosphatase non-receptor type 1	PTPN1	PTN1_HUMAN	0.127186	1.09216	0.117582		6.57985	7.23934	6.69126	7.08625	6.76613	8.54834	15	14	686.71
Q16531	DNA damage-binding protein 1	DDB1	DDB1_HUMAN	0.127111	1.0921	0.0279477		14.0177	13.3952	12.0085	14.1199	14.6013	14.3312	29	29	1367.03
P49356	Protein farnesyltransferase subunit beta	FNTB	FNTB_HUMAN	0.126832	1.09189	0.495549		0.104286	0.102806	0.0930599	0.0960122	0.142301	0.0894215	1	1	79.83
Q9NX76	CKLF-like MARVEL transmembrane domain-containing protein 6	CMTM6	CKLF6_HUMAN	0.126415	1.09158	0.400658		0.0344757	0.040412	0.037678	0.0383509	0.033086	0.0514374	1	1	47.47
Q9UHW5	GPN-loop GTPase 3	GPN3	GPN3_HUMAN	0.126349	1.09153	0.532237		0.0258181	0.0564716	0.0535074	0.0404728	0.053192	0.0545615	1	1	37.35
Q9Y5P6	Mannose-1-phosphate guanyltransferase beta	GMPPB	GMPPB_HUMAN	0.126238	1.09144	0.0502527		1.9419	2.10992	1.74622	2.01417	2.17137	2.14269	6	6	281.3
Q9H0E2	Toll-interacting protein	TOLLIP	TOLIP_HUMAN	0.12589	1.09118	0.181025		0.508338	0.516624	0.501197	0.589473	0.465411	0.610432	3	3	129.85
P58546	Myotrophin	MTPN	MTPN_HUMAN	0.125839	1.09114	0.445621		2.00908	2.08091	2.58867	2.78709	2.58286	1.91743	3	3	166.62
Q8WWI5-3	Isoform 3 of Choline transporter-like protein 1	SLC44A1	CTL1_HUMAN	0.125815	1.09112	0.0249436		0.473144	0.488414	0.458762	0.523914	0.473821	0.55201	6	6	315.58
P40938	Replication factor C subunit 3	RFC3	RFC3_HUMAN	0.125666	1.09101	0.0354888		1.64748	1.54863	1.3912	1.68613	1.65662	1.66205	9	9	401.84
Q9Y256	CAAX prenyl protease 2	RCE1	FACE2_HUMAN	0.125647	1.091	0.227309		0.243613	0.197021	0.184764	0.251289	0.214227	0.216791	3	2	101.38
Q8WU79-3	Isoform 3 of Stromal membrane-associated protein 2	SMAP2	SMAP2_HUMAN	0.125258	1.0907	0.262004		0.183022	0.227247	0.200325	0.243513	0.185771	0.236692	2	2	63.26
O95865	N(G),N(G)-dimethylarginine dimethylaminohydrolase 2	DDAH2	DDAH2_HUMAN	0.124785	1.09035	0.228278		0.614056	0.639457	0.718165	0.818094	0.667891	0.663823	3	3	132.7
P35542	Serum amyloid A-4 protein	SAA4	SAA4_HUMAN	0.124592	1.0902	0.578326		0.0756407	0.078464	0.106195	0.124811	0.0729761	0.0859908	1	1	36.13
Q8IY31-4	Isoform 4 of Intraflagellar transport protein 20 homolog	IFT20	IFT20_HUMAN	0.124548	1.09017	0.658733		0.0319741	0.0102603	0.0164371	0.0293427	0.0211444	0.0134747	1	1	26.71
Q9NU23	LYR motif-containing protein 2	LYRM2	LYRM2_HUMAN	0.124431	1.09008	0.599533		0.0787669	0.0636665	0.111842	0.115401	0.0944088	0.0673705	1	1	29.32
Q9UBF2	Coatomer subunit gamma-2	COPG2	COPG2_HUMAN	0.124419	1.09007	0.041224		1.22521	1.32955	1.18822	1.25168	1.41741	1.41102	10	6	394.86
Q06787-8	Isoform 8 of Fragile X mental retardation protein 1	FMR1	FMR1_HUMAN	0.124129	1.08985	0.0520039		0.098769	0.0861544	0.0867046	0.0965566	0.101752	0.0977248	3	2	153.62
Q9Y624	Junctional adhesion molecule A	F11R	JAM1_HUMAN	0.123602	1.08945	0.486734		4.33481	5.2487	4.97405	4.23817	6.75804	4.86355	5	5	199.66
P13807-2	Isoform 2 of Glycogen [starch] synthase, muscle	GYS1	GYS1_HUMAN	0.123595	1.08945	0.0960716		0.827725	0.93823	0.848472	0.877634	0.90423	1.06641	7	7	269.25
Q2TAA5	GDP-Man:Man(3)GlcNAc(2)-PP-Dol alpha-1,2-mannosyltransferase	ALG11	ALG11_HUMAN	0.12329	1.08922	0.00186886	√	0.264433	0.277169	0.271608	0.296445	0.294513	0.294802	3	3	106.88
P29590-3	Isoform PML-8 of Protein PML	PML	PML_HUMAN	0.123187	1.08914	0.259781		0.10603	0.0834318	0.0824808	0.0923675	0.110865	0.0929503	3	2	140.29
Q8TDX7	Serine/threonine-protein kinase Nek7	NEK7	NEK7_HUMAN	0.122997	1.08899	0.175434		0.0847461	0.0783742	0.0630721	0.0768855	0.0837966	0.0856403	2	2	27.3
Q00688	Peptidyl-prolyl cis-trans isomerase FKBP3	FKBP3	FKBP3_HUMAN	0.122772	1.08883	0.176082		9.68872	9.80919	11.8806	12.0668	10.9329	11.166	12	11	594.23
Q9UQQ1-5	Isoform 5 of N-acetylated-alpha-linked acidic dipeptidase-like protein	NAALADL1	NALDL_HUMAN	0.122024	1.08826	0.423337		0.0436989	0.0473422	0.0360075	0.0549664	0.0461898	0.037106	1	1	72.8
Q09028-4	Isoform 4 of Histone-binding protein RBBP4	RBBP4	RBBP4_HUMAN	0.121928	1.08819	0.336672		4.06972	4.08927	3.73697	3.7739	5.2551	3.91605	11	6	460.92
Q96GX9	Methylthioribulose-1-phosphate dehydratase	APIP	MTNB_HUMAN	0.1219	1.08817	0.289103		0.121512	0.146053	0.114854	0.157789	0.117025	0.141321	2	2	165.19
P02649	Apolipoprotein E	APOE	APOE_HUMAN	0.121895	1.08816	0.237407		32.2052	35.7388	40.5635	39.5751	42.7723	35.7266	17	11	937.3
P15374	Ubiquitin carboxyl-terminal hydrolase isozyme L3	UCHL3	UCHL3_HUMAN	0.121815	1.0881	0.266004		1.65716	1.55064	1.88348	2.06188	1.84262	1.63534	6	6	198.34
O75717	WD repeat and HMG-box DNA-binding protein 1	WDHD1	WDHD1_HUMAN	0.12176	1.08806	0.165321		0.404143	0.436246	0.366987	0.396098	0.413189	0.504413	5	5	126.13
O43772	Mitochondrial carnitine/acylcarnitine carrier protein	SLC25A20	MCAT_HUMAN	0.121738	1.08804	0.274925		0.287523	0.303173	0.251622	0.277228	0.359237	0.280014	2	2	71.3
O60220	Mitochondrial import inner membrane translocase subunit Tim8 A	TIMM8A	TIM8A_HUMAN	0.121619	1.08796	0.638933		1.00541	0.852489	1.34326	1.57645	1.03549	0.87078	2	2	89.24
Q8IZ81	ELMO domain-containing protein 2	ELMOD2	ELMD2_HUMAN	0.121549	1.0879	0.127782		1.01288	0.985463	0.954022	0.949686	1.04029	1.22191	5	5	211.03
P06737-2	Isoform 2 of Glycogen phosphorylase, liver form	PYGL	PYGL_HUMAN	0.121531	1.08789	0.0622771		5.71286	6.22532	5.38701	6.11496	5.83773	6.89519	23	18	1091.24
P30048-2	Isoform 2 of Thioredoxin-dependent peroxide reductase, mitochondrial	PRDX3	PRDX3_HUMAN	0.121258	1.08768	0.0777783		82.8441	92.7159	87.0583	87.7822	102.638	95.2254	13	13	698.04
P00558	Phosphoglycerate kinase 1	PGK1	PGK1_HUMAN	0.12118	1.08762	0.013278		74.3165	79.2583	68.9374	80.7483	80.5867	80.6746	30	28	1397.39
P10155	60 kDa SS-A/Ro ribonucleoprotein	TROVE2	RO60_HUMAN	0.121145	1.0876	0.0211275		2.23906	2.46798	2.20572	2.4756	2.37955	2.66315	12	12	600.18
Q8IY67-2	Isoform 2 of Ribonucleoprotein PTB-binding 1	RAVER1	RAVR1_HUMAN	0.121093	1.08756	0.212262		2.4361	2.57956	2.4628	2.38394	3.13408	2.61523	11	11	543.16
Q53GQ0	Estradiol 17-beta-dehydrogenase 12	HSD17B12	DHB12_HUMAN	0.121036	1.08752	0.029171		22.2336	23.2794	21.0762	22.3106	24.4054	25.7008	14	14	774.33
Q6P1M3-2	Isoform A of Lethal(2) giant larvae protein homolog 2	LLGL2	L2GL2_HUMAN	0.120968	1.08746	0.619376		0.0940914	0.0883387	0.0721065	0.112888	0.100785	0.0631267	3	3	77.4
P40939	Trifunctional enzyme subunit alpha, mitochondrial	HADHA	ECHA_HUMAN	0.12083	1.08736	0.00984624	√	89.4325	93.2792	87.032	91.9491	99.8819	101.478	45	43	2378.92
Q96FW1	Ubiquitin thioesterase OTUB1	OTUB1	OTUB1_HUMAN	0.120657	1.08723	0.0367477		4.56949	4.28683	4.03375	4.90125	4.42405	4.68917	10	8	427.99
Q9UM00-2	Isoform 2 of Transmembrane and coiled-coil domain-containing protein 1	TMCO1	TMCO1_HUMAN	0.120483	1.0871	0.062436		4.36706	4.29835	3.92945	4.77625	4.66295	4.25265	3	3	198.37
P35573	Glycogen debranching enzyme	AGL	GDE_HUMAN	0.120428	1.08706	0.582865		0.697004	0.41338	0.361459	0.668419	0.53343	0.398128	8	7	217.12
Q07960	Rho GTPase-activating protein 1	ARHGAP1	RHG01_HUMAN	0.120249	1.08692	0.00545263	√	7.67368	7.75277	7.77427	8.21505	8.08883	8.9135	12	12	542.51
Q70UQ0-4	Isoform 4 of Inhibitor of nuclear factor kappa-B kinase-interacting protein	IKBIP	IKIP_HUMAN	0.120015	1.08675	0.00388704	√	5.51601	5.83387	5.65194	5.93192	6.24413	6.30062	12	11	606.57
P14923	Junction plakoglobin	JUP	PLAK_HUMAN	0.119997	1.08673	0.0102782		3.10402	3.10197	2.81986	3.35368	3.1454	3.30961	20	14	1083.41
P14550	Alcohol dehydrogenase [NADP(+)]	AKR1A1	AK1A1_HUMAN	0.119721	1.08652	0.00494378	√	7.04079	7.45705	6.73657	7.64001	7.42215	8.00955	16	15	712.13
Q9Y281-3	Isoform 3 of Cofilin-2	CFL2	COF2_HUMAN	0.119255	1.08617	0.0377298		1.84091	1.83529	1.97104	2.05174	2.10036	1.98179	9	6	328.18
Q8NCN5	Pyruvate dehydrogenase phosphatase regulatory subunit, mitochondrial	PDPR	PDPR_HUMAN	0.119252	1.08617	0.449313		0.331751	0.422258	0.410829	0.365827	0.36328	0.536107	3	3	171.37
P50897	Palmitoyl-protein thioesterase 1	PPT1	PPT1_HUMAN	0.119105	1.08606	0.364739		0.673458	0.691567	0.800441	0.935608	0.661167	0.755051	4	3	211.46
Q96S52	GPI transamidase component PIG-S	PIGS	PIGS_HUMAN	0.119022	1.086	0.094338		0.603998	0.600201	0.504242	0.580977	0.60259	0.671798	5	5	240.64
Q9H993	UPF0364 protein C6orf211	C6orf211	CF211_HUMAN	0.118906	1.08591	0.0986859		1.15225	1.26259	1.24288	1.19523	1.30882	1.4679	8	8	314.2
Q9H6K4	Optic atrophy 3 protein	OPA3	OPA3_HUMAN	0.118502	1.08561	0.12644		0.0698071	0.0563097	0.0612344	0.0671312	0.0696522	0.0666064	1	1	34.42
P04179-4	Isoform 4 of Superoxide dismutase [Mn], mitochondrial	SOD2	SODM_HUMAN	0.118052	1.08527	0.229355		6.93752	6.71189	8.15478	7.609	8.70431	7.35008	8	8	321.25
P21333-2	Isoform 2 of Filamin-A	FLNA	FLNA_HUMAN	0.1177	1.085	0.0016444	√	111.794	110.934	103.224	117.658	116.859	119.142	109	98	5715.91
O00584	Ribonuclease T2	RNASET2	RNT2_HUMAN	0.117579	1.08491	0.477851		0.950676	0.774348	1.18196	1.26573	0.983899	0.904196	3	3	161.76
P78556-2	Isoform 2 of C-C motif chemokine 20	CCL20	CCL20_HUMAN	0.117176	1.08461	0.0650823		2.15574	2.40102	2.14716	2.36556	2.59086	2.31471	2	2	102.99
P30038	Delta-1-pyrroline-5-carboxylate dehydrogenase, mitochondrial	ALDH4A1	AL4A1_HUMAN	0.117168	1.0846	0.00844128	√	43.9146	48.2175	44.5288	48.5179	50.1522	49.5528	21	21	1062.08
Q9NPF4	Probable tRNA N6-adenosine threonylcarbamoyltransferase	OSGEP	OSGEP_HUMAN	0.11673	1.08427	0.341128		0.165685	0.240095	0.178074	0.206128	0.185804	0.241127	3	3	105.49
O43719	HIV Tat-specific factor 1	HTATSF1	HTSF1_HUMAN	0.11666	1.08422	0.423345		0.814805	1.00169	1.03131	0.841026	1.23438	1.01224	4	4	92.41
O43707	Alpha-actinin-4	ACTN4	ACTN4_HUMAN	0.116506	1.08411	0.00796462	√	74.9724	78.7749	72.7508	78.5201	79.9733	87.0546	64	45	3829.59
Q9Y376	Calcium-binding protein 39	CAB39	CAB39_HUMAN	0.116169	1.08385	0.354506		0.609934	0.537723	0.550043	0.670519	0.485705	0.683833	7	7	242.38
Q8IXT5	RNA-binding protein 12B	RBM12B	RB12B_HUMAN	0.115674	1.08348	0.0357589		0.249687	0.249977	0.230253	0.265195	0.242556	0.2831	3	3	50.14
Q9BQC6	Ribosomal protein 63, mitochondrial	MRPL57	RT63_HUMAN	0.115413	1.08328	0.219959		0.548416	0.670011	0.673832	0.644929	0.751744	0.653183	1	1	56.21
Q9UHD8	Septin-9	SEPT9	SEPT9_HUMAN	0.115307	1.08321	0.0619458		6.4015	5.94806	5.52319	6.31702	6.05039	6.99245	16	16	764.74
P46063	ATP-dependent DNA helicase Q1	RECQL	RECQ1_HUMAN	0.114913	1.08291	0.118264		2.49716	2.64607	2.31123	2.42356	2.62515	3.0238	9	9	346.44
Q96CS3	FAS-associated factor 2	FAF2	FAF2_HUMAN	0.114607	1.08268	0.153237		5.61931	6.39798	5.74333	5.5968	6.81211	6.82016	11	10	505.27
Q9Y3D0	Mitotic spindle-associated MMXD complex subunit MIP18	FAM96B	MIP18_HUMAN	0.114522	1.08262	0.469742		1.97838	1.91703	2.60848	2.35839	2.76369	1.91915	5	5	254.14
Q00796	Sorbitol dehydrogenase	SORD	DHSO_HUMAN	0.114136	1.08233	0.122141		4.3763	4.42029	3.92245	4.04459	4.80697	4.9146	12	12	601.26
P51648	Fatty aldehyde dehydrogenase	ALDH3A2	AL3A2_HUMAN	0.114046	1.08226	0.0281699		7.96436	7.66784	6.87868	8.25321	7.87093	8.23847	14	14	701.16
P49189	4-trimethylaminobutyraldehyde dehydrogenase	ALDH9A1	AL9A1_HUMAN	0.113622	1.08194	0.0640431		4.97771	4.71091	4.10732	4.97227	4.79114	5.16299	7	7	271.37
P61421	V-type proton ATPase subunit d 1	ATP6V0D1	VA0D1_HUMAN	0.113487	1.08184	0.0494492		1.91399	1.9091	1.75845	2.08008	1.83049	2.12777	6	6	289.7
Q96S21	Ras-related protein Rab-40C	RAB40C	RB40C_HUMAN	0.113268	1.08168	0.155328		0.0748096	0.0698561	0.0739826	0.0846372	0.0685491	0.0833202	1	1	28.33
Q9UJX5-2	Isoform 2 of Anaphase-promoting complex subunit 4	ANAPC4	APC4_HUMAN	0.112908	1.08141	0.324706		0.188384	0.136019	0.152498	0.162045	0.192488	0.161189	3	3	228.3
P52735-3	Isoform 3 of Guanine nucleotide exchange factor VAV2	VAV2	VAV2_HUMAN	0.112842	1.08136	0.290616		0.750093	0.884923	0.884155	0.842872	0.804505	1.07674	8	8	341.17
Q9Y490	Talin-1	TLN1	TLN1_HUMAN	0.112821	1.08134	0.00492497	√	27.5391	28.2512	27.0414	28.4416	30.6108	30.5167	71	60	3670.39
P11310	Medium-chain specific acyl-CoA dehydrogenase, mitochondrial	ACADM	ACADM_HUMAN	0.112781	1.08131	0.0138682		5.04411	4.62012	4.59936	5.12537	5.11352	5.18447	9	9	426.98
Q9NVJ2	ADP-ribosylation factor-like protein 8B	ARL8B	ARL8B_HUMAN	0.11277	1.0813	0.326284		1.12457	1.25758	1.2714	1.06968	1.45743	1.42349	6	6	274.36
Q16563-2	Isoform 2 of Synaptophysin-like protein 1	SYPL1	SYPL1_HUMAN	0.112619	1.08119	0.00414397		2.28685	2.40377	2.21452	2.54253	2.40063	2.52261	2	2	93.26
P23526	Adenosylhomocysteinase	AHCY	SAHH_HUMAN	0.112409	1.08103	0.0318218		61.6589	61.7362	53.6674	63.9992	61.3261	66.0849	27	26	1331.17
O95861-4	Isoform 4 of 3'(2'),5'-bisphosphate nucleotidase 1	BPNT1	BPNT1_HUMAN	0.112026	1.08074	0.0207883		0.553901	0.583399	0.508976	0.6086	0.572675	0.597929	3	2	160.61
P27449	V-type proton ATPase 16 kDa proteolipid subunit	ATP6V0C	VATL_HUMAN	0.111776	1.08056	0.396321		2.0897	2.88014	2.44854	2.17343	2.80774	3.03482	3	2	77.4
O43677	NADH dehydrogenase [ubiquinone] 1 subunit C1, mitochondrial	NDUFC1	NDUC1_HUMAN	0.111535	1.08038	0.468445		0.646504	0.549421	0.727955	0.817413	0.70024	0.560863	1	1	47.73
P53992	Protein transport protein Sec24C	SEC24C	SC24C_HUMAN	0.11138	1.08026	0.0278964		9.70362	9.59129	8.67061	9.52119	10.3834	10.3055	23	20	991.68
Q9Y312	Protein AAR2 homolog	AAR2	AAR2_HUMAN	0.111306	1.08021	0.197176		0.503756	0.559479	0.494824	0.487937	0.551804	0.643284	4	4	225.58
Q96KA5-2	Isoform 2 of Cleft lip and palate transmembrane protein 1-like protein	CLPTM1L	CLP1L_HUMAN	0.111217	1.08014	0.119952		0.45713	0.482909	0.503082	0.465766	0.55321	0.539794	3	3	128.98
Q9UJX3-2	Isoform 2 of Anaphase-promoting complex subunit 7	ANAPC7	APC7_HUMAN	0.110919	1.07992	0.379783		0.29487	0.337911	0.291562	0.280965	0.403098	0.314149	5	4	287.71
Q9P2R3	Ankyrin repeat and FYVE domain-containing protein 1	ANKFY1	ANFY1_HUMAN	0.11088	1.07989	0.196725		0.245096	0.263637	0.210543	0.235765	0.286237	0.254735	5	5	175.4
Q14203-3;Q99996-5	Isoform 3 of Dynactin subunit 1	DCTN1	DCTN1_HUMAN	0.110599	1.07968	0.0168489		4.69004	4.92636	4.45368	4.76888	5.1146	5.30766	27	25	1399.72
P10644;P31321	cAMP-dependent protein kinase type I-alpha regulatory subunit	PRKAR1A	KAP0_HUMAN	0.110017	1.07924	0.0118785		4.13509	4.36117	3.82073	4.43145	4.32789	4.53366	11	9	488.92
Q9NXE4-3	Isoform 3 of Sphingomyelin phosphodiesterase 4	SMPD4	NSMA3_HUMAN	0.10991	1.07916	0.317965		0.755089	0.639842	0.56298	0.771846	0.72643	0.614624	5	5	216.03
Q13308	Inactive tyrosine-protein kinase 7	PTK7	PTK7_HUMAN	0.109818	1.07909	0.0353735		2.90627	3.00439	2.65294	2.94803	2.96806	3.32482	10	10	614.65
O43292-2	Isoform 2 of Glycosylphosphatidylinositol anchor attachment 1 protein	GPAA1	GPAA1_HUMAN	0.109801	1.07908	0.233978		0.00949962	0.0108002	0.00893883	0.010366	0.00910887	0.0120759	1	1	48.31
O00429-3	Isoform 2 of Dynamin-1-like protein	DNM1L	DNM1L_HUMAN	0.109573	1.07891	0.0586106		3.55879	3.96451	3.83439	3.78267	4.11563	4.35561	18	16	1069.79
Q13561	Dynactin subunit 2	DCTN2	DCTN2_HUMAN	0.109464	1.07883	0.180971		8.37543	7.83883	9.23267	9.75393	9.22803	8.47087	17	17	793.02
Q9BUN8-2	Isoform 2 of Derlin-1	DERL1	DERL1_HUMAN	0.109442	1.07881	0.115771		1.07619	1.02658	0.905622	1.08066	0.984477	1.18035	1	1	49.77
Q9Y4W6	AFG3-like protein 2	AFG3L2	AFG32_HUMAN	0.109407	1.07878	0.000156336	√	4.22715	4.28664	4.0392	4.49971	4.48064	4.56162	18	17	694.03
O43293	Death-associated protein kinase 3	DAPK3	DAPK3_HUMAN	0.108732	1.07828	0.157917		0.2707	0.291792	0.259969	0.279574	0.26728	0.33999	2	2	92.4
Q9BV68-2	Isoform 2 of E3 ubiquitin-protein ligase RNF126	RNF126	RN126_HUMAN	0.108315	1.07797	0.607787		1.20792	1.15526	1.20535	1.09379	1.72432	1.02865	2	2	76.03
P40937	Replication factor C subunit 5	RFC5	RFC5_HUMAN	0.108162	1.07785	0.0516986		1.5708	1.62864	1.45887	1.62837	1.78145	1.61116	7	7	343.25
P49321	Nuclear autoantigenic sperm protein	NASP	NASP_HUMAN	0.107928	1.07768	0.0814453		13.4688	12.6409	13.6019	14.4007	14.9698	13.4259	22	21	1079.84
Q9BW91-2	Isoform 2 of ADP-ribose pyrophosphatase, mitochondrial	NUDT9	NUDT9_HUMAN	0.107646	1.07747	0.359229		0.207647	0.211931	0.290005	0.258813	0.229285	0.276455	3	3	63.04
P03905	NADH-ubiquinone oxidoreductase chain 4	MT-ND4	NU4M_HUMAN	0.107252	1.07717	0.156357		0.912091	0.992198	0.87137	0.870107	1.02547	1.09429	4	4	207.4
O95571	Persulfide dioxygenase ETHE1, mitochondrial	ETHE1	ETHE1_HUMAN	0.107118	1.07707	0.0546553		1.82085	2.07042	2.0625	2.1594	2.08729	2.16597	8	8	346.28
O94903	Proline synthase co-transcribed bacterial homolog protein	PROSC	PROSC_HUMAN	0.106851	1.07688	0.0742777		2.4613	2.55906	2.68415	2.95475	2.63087	2.71118	6	6	301.32
O43929	Origin recognition complex subunit 4	ORC4	ORC4_HUMAN	0.106375	1.07652	0.365764		0.129429	0.0874928	0.100588	0.115087	0.101487	0.125231	2	2	89.03
P35580;P35580-2	Myosin-10	MYH10	MYH10_HUMAN	0.106231	1.07641	0.120256		64.2872	67.1405	69.1907	69.4641	78.7051	67.779	99	80	5395.89
P30042	ES1 protein homolog, mitochondrial	C21orf33	ES1_HUMAN	0.106177	1.07637	0.217325		2.34031	2.67103	2.51163	2.3775	3.03405	2.68596	5	5	276.55
Q8N6M0	OTU domain-containing protein 6B	OTUD6B	OTU6B_HUMAN	0.105978	1.07622	0.12704		0.189853	0.179842	0.185328	0.215635	0.176681	0.205013	1	1	80.35
Q9P2R6	Arginine-glutamic acid dipeptide repeats protein	RERE	RERE_HUMAN	0.105447	1.07583	0.243011		0.0490396	0.0490155	0.0537429	0.061306	0.0534004	0.0486021	1	1	28.72
Q9H910-2	Isoform 2 of Hematological and neurological expressed 1-like protein	HN1L	HN1L_HUMAN	0.105259	1.07569	0.530345		5.46431	3.96791	6.27758	6.61246	5.69815	4.58823	5	5	258.48
Q96IU4	Alpha/beta hydrolase domain-containing protein 14B	ABHD14B	ABHEB_HUMAN	0.105075	1.07555	0.0209869		2.85309	3.11365	2.78779	3.07818	3.23441	3.10335	3	3	132.46
Q15067	Peroxisomal acyl-coenzyme A oxidase 1	ACOX1	ACOX1_HUMAN	0.104847	1.07538	0.14051		13.1097	15.5716	13.8227	13.7839	15.3219	16.6021	23	23	1112.75
Q9NQ50	39S ribosomal protein L40, mitochondrial	MRPL40	RM40_HUMAN	0.104637	1.07522	0.493777		4.90095	4.93183	5.99965	5.96993	6.59138	4.4621	8	8	290.63
Q8TBP6	Solute carrier family 25 member 40	SLC25A40	S2540_HUMAN	0.104568	1.07517	0.584257		0.0841401	0.053777	0.0476846	0.0652906	0.0504373	0.0838258	1	1	38.52
Q9NQH7-2	Isoform 2 of Probable Xaa-Pro aminopeptidase 3	XPN	XPP3_HUMAN	0.104335	1.075	0.601972		0.193649	0.23065	0.212415	0.166882	0.293082	0.224502	3	2	105.48
P04632	Calpain small subunit 1	CAPNS1	CPNS1_HUMAN	0.10414	1.07485	0.0723232		1.6719	1.73476	1.83319	1.99232	1.79764	1.8421	6	6	338.12
P12268	Inosine-5'-monophosphate dehydrogenase 2	IMPDH2	IMDH2_HUMAN	0.103776	1.07458	0.0964118		38.5524	38.6355	33.2894	37.4425	42.2657	39.0088	23	22	1459.31
Q06203	Amidophosphoribosyltransferase	PPAT	PUR1_HUMAN	0.103713	1.07454	0.238624		1.59092	1.43377	1.21499	1.60092	1.349	1.60578	4	4	185.86
O60826	Coiled-coil domain-containing protein 22	CCDC22	CCD22_HUMAN	0.103534	1.0744	0.547384		0.154068	0.242742	0.201925	0.16451	0.255198	0.223575	4	4	150.37
Q6NUK1	Calcium-binding mitochondrial carrier protein SCaMC-1	SLC25A24	SCMC1_HUMAN	0.103228	1.07417	0.0164912		1.22939	1.32266	1.16022	1.34983	1.29395	1.34385	10	10	350.43
P22694-8	Isoform 8 of cAMP-dependent protein kinase catalytic subunit beta	PRKACB	KAPCB_HUMAN	0.102911	1.07394	0.444508		0.165405	0.109858	0.121121	0.152536	0.152264	0.120893	3	1	119.47
Q8N0X7	Spartin	SPG20	SPG20_HUMAN	0.102856	1.0739	0.391147		0.0954064	0.0979468	0.0929595	0.0993344	0.0830716	0.125064	2	2	99.48
O96011-2	Isoform 2 of Peroxisomal membrane protein 11B	PEX11B	PX11B_HUMAN	0.102819	1.07387	0.0309925		0.737093	0.768882	0.686514	0.793169	0.732517	0.828761	7	7	319.98
Q96QV6	Histone H2A type 1-A	HIST1H2AA	H2A1A_HUMAN	0.102761	1.07383	0.980678		19.6186	14.854	26.4195	13.213	39.9366	12.238	5	1	181.19
Q9UEU0	Vesicle transport through interaction with t-SNAREs homolog 1B	VTI1B	VTI1B_HUMAN	0.102679	1.07377	0.632228		0.0972497	0.067471	0.0907015	0.0987999	0.110109	0.0653542	2	2	51.01
Q9UBN7	Histone deacetylase 6	HDAC6	HDAC6_HUMAN	0.102548	1.07367	0.271027		0.211303	0.210131	0.152428	0.213165	0.195305	0.207668	2	1	91.65
A6NDG6	Phosphoglycolate phosphatase	PGP	PGP_HUMAN	0.102058	1.0733	0.129908		2.70591	2.88207	2.67574	3.10878	2.5908	3.1699	5	5	278.16
Q9H223	EH domain-containing protein 4	EHD4	EHD4_HUMAN	0.101967	1.07324	0.190674		0.509129	0.500757	0.461607	0.555079	0.451062	0.573118	5	3	280.5
Q99624	Sodium-coupled neutral amino acid transporter 3	SLC38A3	S38A3_HUMAN	0.101839	1.07314	0.547666		0.703345	0.791778	0.907105	0.638166	1.00045	0.939313	4	3	146.28
Q96NB3	Zinc finger protein 830	ZNF830	ZN830_HUMAN	0.101424	1.07283	0.756686		0.145573	0.140858	0.143431	0.137613	0.217655	0.105902	3	2	118.16
Q14166	Tubulin--tyrosine ligase-like protein 12	TTLL12	TTL12_HUMAN	0.101077	1.07257	0.0831521		9.63568	11.0641	10.0079	10.1142	11.1298	11.6923	24	22	1183.89
Q9UL25	Ras-related protein Rab-21	RAB21	RAB21_HUMAN	0.100816	1.07238	0.0063937	√	3.57047	3.52751	3.53659	3.71891	3.66224	4.02315	6	5	356.97
Q9BY43	Charged multivesicular body protein 4a	CHMP4A	CHM4A_HUMAN	0.100774	1.07235	0.58838		1.44011	1.24009	1.84008	1.89488	1.73806	1.21437	6	5	313.54
Q99816	Tumor susceptibility gene 101 protein	TSG101	TS101_HUMAN	0.100774	1.07235	0.0461071		0.66536	0.712195	0.71895	0.743318	0.778711	0.726155	4	4	187.87
Q9NQX3	Gephyrin	GPHN	GEPH_HUMAN	0.100717	1.07231	0.239154		0.660302	0.536376	0.474163	0.596453	0.592216	0.602984	5	5	189.48
O94973	AP-2 complex subunit alpha-2	AP2A2	AP2A2_HUMAN	0.100495	1.07214	0.08714		1.70462	1.69322	1.74546	1.74863	1.71542	2.05029	15	8	717.84
P11047	Laminin subunit gamma-1	LAMC1	LAMC1_HUMAN	0.100434	1.0721	0.026809		1.13996	1.08135	1.17055	1.19619	1.18501	1.25519	11	9	399.6
Q9Y6I3-3;Q9H201-2	Isoform 3 of Epsin-1	EPN1	EPN1_HUMAN	0.100236	1.07195	0.496025		0.185797	0.224381	0.284991	0.282378	0.256184	0.206623	3	3	146.88
Q7LGA3	Heparan sulfate 2-O-sulfotransferase 1	HS2ST1	HS2ST_HUMAN	0.100173	1.0719	0.0457609		3.40878	3.50553	3.15106	3.51542	3.79616	3.47751	9	8	382.05
Q16539;O15264;Q15746-5	Mitogen-activated protein kinase 14	MAPK14	MK14_HUMAN	0.0994123	1.07134	0.18517		0.683546	0.771347	0.604306	0.72102	0.675338	0.809739	7	5	229.81
Q9H479	Fructosamine-3-kinase	FN3K	FN3K_HUMAN	0.098585	1.07072	0.262416		1.80185	1.99844	1.66897	1.8575	1.71895	2.27961	5	5	249.5
Q9P260	LisH domain and HEAT repeat-containing protein KIAA1468	KIAA1468	K1468_HUMAN	0.0985157	1.07067	0.186084		0.102064	0.0892035	0.077336	0.0989835	0.0929091	0.0956937	3	3	155.98
O00291-3;Q9NX08	Isoform 3 of Huntingtin-interacting protein 1	HIP1	HIP1_HUMAN	0.098505	1.07066	0.279776		0.113416	0.109848	0.0943454	0.122878	0.118621	0.0985536	2	2	92.12
P54819-2	Isoform 2 of Adenylate kinase 2, mitochondrial	AK2	KAD2_HUMAN	0.0985033	1.07066	0.351298		20.8159	20.0192	26.1486	25.5981	24.7326	21.3862	15	15	765.09
Q96J01	THO complex subunit 3	THOC3	THOC3_HUMAN	0.0981353	1.07039	0.459199		0.0824848	0.0625601	0.0544982	0.0834871	0.0608277	0.069274	1	1	27.93
Q5TGZ0-2	Isoform 2 of Mitochondrial inner membrane organizing system protein 1	MINOS1	MOS1_HUMAN	0.0981187	1.07038	0.427223		0.734468	0.690867	0.73694	0.824168	0.870767	0.619515	1	1	51
Q9NQ88	Fructose-2,6-bisphosphatase TIGAR	TIGAR	TIGAR_HUMAN	0.0980161	1.0703	0.143383		0.0626595	0.0610438	0.0649812	0.0705479	0.0594567	0.0719446	1	1	46.16
P63092	Guanine nucleotide-binding protein G(s) subunit alpha isoforms short	GNAS	GNAS2_HUMAN	0.0978746	1.0702	0.119816		1.9006	2.12958	1.99294	2.00481	2.34054	2.10058	5	5	144.05
Q9P0S9	Transmembrane protein 14C	TMEM14C	TM14C_HUMAN	0.0976374	1.07002	0.759078		0.282638	0.290394	0.361449	0.22538	0.468757	0.305777	2	2	78.48
Q8N138-4	Isoform 2 of ORM1-like protein 3	ORMDL3	ORML3_HUMAN	0.0975758	1.06997	0.0989818		0.310006	0.30235	0.272321	0.318092	0.33287	0.29562	1	1	30.64
P46109	Crk-like protein	CRKL	CRKL_HUMAN	0.097456	1.06989	0.279086		2.36672	2.20403	2.54426	2.8959	2.31067	2.40567	7	6	343.4
Q9NUJ1	Mycophenolic acid acyl-glucuronide esterase, mitochondrial	ABHD10	ABHDA_HUMAN	0.0974146	1.06985	0.0504406		3.66886	3.50086	3.15568	3.79	3.52351	3.73316	6	6	239.87
P54619-2	Isoform 2 of 5'-AMP-activated protein kinase subunit gamma-1	PRKAG1	AAKG1_HUMAN	0.0974053	1.06985	0.0679197		1.18983	1.12945	0.999205	1.14878	1.21212	1.18937	6	5	237.94
O75369-2	Isoform 2 of Filamin-B	FLNB	FLNB_HUMAN	0.0972579	1.06974	0.0147755		91.2683	94.4417	87.6615	93.6546	101.386	97.3948	112	102	5723.76
P63104	14-3-3 protein zeta/delta	YWHAZ	1433Z_HUMAN	0.096962	1.06952	0.0935586		44.1132	41.2513	41.3664	48.9133	43.5475	43.0803	16	8	831.84
Q9HCE1	Putative helicase MOV-10	MOV10	MOV10_HUMAN	0.0964807	1.06916	0.0699552		3.20133	3.35639	2.94376	3.23976	3.20814	3.71071	17	16	689.34
Q9NXF1-2	Isoform 2 of Testis-expressed sequence 10 protein	TEX10	TEX10_HUMAN	0.0963571	1.06907	0.329154		1.00818	1.00657	0.948047	0.968164	1.25076	0.948516	9	9	428.66
P18433-2	Isoform 2 of Receptor-type tyrosine-protein phosphatase alpha	PTPRA	PTPRA_HUMAN	0.0957866	1.06865	0.189434		0.168253	0.173939	0.133585	0.166296	0.162291	0.179851	2	1	111.64
Q86WA6-2	Isoform 2 of Valacyclovir hydrolase	BPHL	BPHL_HUMAN	0.0954883	1.06843	0.0264575		1.28029	1.29185	1.18862	1.37631	1.25038	1.3914	7	7	280.04
O75909-2	Isoform 2 of Cyclin-K	CCNK	CCNK_HUMAN	0.095217	1.06823	0.125057		0.0660441	0.0752305	0.0674361	0.0771973	0.0667146	0.0790381	2	2	62.41
Q9HC21-2	Isoform 2 of Mitochondrial thiamine pyrophosphate carrier	SLC25A19	TPC_HUMAN	0.0950812	1.06813	0.201021		0.313233	0.308693	0.286928	0.32483	0.280305	0.365635	3	3	98.87
Q15369	Transcription elongation factor B polypeptide 1	TCEB1	ELOC_HUMAN	0.0950115	1.06807	0.26625		6.39885	5.73011	6.81948	7.47843	6.55984	6.20006	6	6	376.44
Q8WVI0	Small integral membrane protein 4	SMIM4	SMIM4_HUMAN	0.0949445	1.06802	0.214415		0.177912	0.170619	0.151963	0.183029	0.154631	0.19688	1	1	78.76
Q9NXS2	Glutaminyl-peptide cyclotransferase-like protein	QPCTL	QPCTL_HUMAN	0.0947137	1.06785	0.137793		1.1825	1.12922	1.11998	1.28695	1.07455	1.30305	7	7	247.93
O75695	Protein XRP2	RP2	XRP2_HUMAN	0.0944055	1.06763	0.555444		0.0155126	0.0238246	0.0182117	0.0220415	0.0155034	0.0238958	1	1	43.67
Q13555-10	Isoform 10 of Calcium/calmodulin-dependent protein kinase type II subunit gamma	CAMK2G	KCC2G_HUMAN	0.0943405	1.06758	0.321126		0.0647557	0.0722743	0.0732856	0.0837154	0.0626727	0.07814	5	1	205.61
P53384-2	Isoform 2 of Cytosolic Fe-S cluster assembly factor NUBP1	NUBP1	NUBP1_HUMAN	0.0943269	1.06757	0.194227		2.21186	1.91494	1.88327	2.31759	2.11783	1.98073	5	5	263.22
Q8TB22-3	Isoform 3 of Spermatogenesis-associated protein 20	SPATA20	SPT20_HUMAN	0.0940256	1.06734	0.44549		0.100389	0.0635661	0.0646171	0.0879849	0.0731848	0.0827956	2	2	41.8
Q5T0D9	Tumor protein p63-regulated gene 1-like protein	TPRG1L	TPRGL_HUMAN	0.0936403	1.06706	0.438206		0.244433	0.196389	0.17256	0.248093	0.180768	0.225654	2	2	51.7
P09669	Cytochrome c oxidase subunit 6C	COX6C	COX6C_HUMAN	0.0932098	1.06674	0.0873564		5.58858	5.41942	4.97648	6.11656	5.36429	5.57044	5	5	196.13
Q9Y2S2-2	Isoform 2 of Lambda-crystallin homolog	CRYL1	CRYL1_HUMAN	0.0931551	1.0667	0.271383		1.5172	1.83118	1.49037	1.59272	1.58101	1.98777	5	5	203.52
O43819	Protein SCO2 homolog, mitochondrial	SCO2	SCO2_HUMAN	0.0930838	1.06665	0.251009		0.605445	0.560299	0.482	0.623166	0.513063	0.621334	3	3	178.87
Q9BRR6-2	Isoform 2 of ADP-dependent glucokinase	ADPGK	ADPGK_HUMAN	0.093056	1.06663	0.390255		0.608217	0.701104	0.712154	0.680255	0.610584	0.865322	6	5	312.29
Q9UBU9	Nuclear RNA export factor 1	NXF1	NXF1_HUMAN	0.092484	1.0662	0.0562365		2.99873	2.9561	2.76407	2.87755	3.2745	3.14407	12	11	582.33
P55957	BH3-interacting domain death agonist	BID	BID_HUMAN	0.0921228	1.06594	0.622923		1.82655	1.64369	2.38189	2.24783	2.45485	1.53532	6	6	355.38
Q9NX47	E3 ubiquitin-protein ligase MARCH5	MARH5	MARH5_HUMAN	0.091949	1.06581	0.0271709		1.55605	1.58422	1.38093	1.57872	1.59363	1.64639	6	6	309.04
Q13547	Histone deacetylase 1	HDAC1	HDAC1_HUMAN	0.0917583	1.06567	0.104747		1.93002	2.29511	1.98316	2.07305	2.24646	2.29645	12	6	496.5
Q14746-2	Isoform 2 of Conserved oligomeric Golgi complex subunit 2	COG2	COG2_HUMAN	0.0916509	1.06559	0.288877		0.565345	0.55684	0.512656	0.507427	0.669942	0.564699	7	6	320.52
O75351	Vacuolar protein sorting-associated protein 4B	VPS4B	VPS4B_HUMAN	0.0916404	1.06558	0.184723		0.903565	0.945595	1.05246	1.03492	0.937275	1.11971	7	5	310.97
P78383	Solute carrier family 35 member B1	SLC35B1	S35B1_HUMAN	0.0915379	1.06551	0.446287		0.257754	0.209602	0.245224	0.205829	0.292302	0.261126	2	2	91.9
P02787	Serotransferrin	TF	TRFE_HUMAN	0.0914538	1.06544	0.193678		114.387	114.015	133.281	136.997	121.285	127.07	51	48	2685.57
O60925	Prefoldin subunit 1	PFDN1	PFD1_HUMAN	0.0913342	1.06535	0.816355		0.11157	0.0779598	0.143203	0.17834	0.0982614	0.0778766	1	1	53.02
Q6V0I7-3	Isoform 3 of Protocadherin Fat 4	FAT4	FAT4_HUMAN	0.0908935	1.06503	0.295609		0.474502	0.411407	0.423859	0.52918	0.406622	0.459139	1	1	18.56
P23434	Glycine cleavage system H protein, mitochondrial	GCSH	GCSH_HUMAN	0.0907633	1.06493	0.510784		5.44453	6.12023	6.85114	6.25712	7.95185	5.40274	4	4	137.49
O14579	Coatomer subunit epsilon	CO	COPE_HUMAN	0.0901324	1.06447	0.0459834		5.61296	5.53192	5.22382	5.65813	6.14531	5.62052	8	8	316.64
P54802	Alpha-N-acetylglucosaminidase	NAGLU	ANAG_HUMAN	0.0900907	1.06444	0.0750157		0.277782	0.250842	0.232453	0.263697	0.269666	0.276755	4	4	191.27
Q9BZZ5-2	Isoform 2 of Apoptosis inhibitor 5	API5	API5_HUMAN	0.0898614	1.06427	0.156466		5.75817	5.33771	5.13162	6.19472	5.13266	5.94302	12	10	538.21
Q9HB90	Ras-related GTP-binding protein C	RRAGC	RRAGC_HUMAN	0.0895668	1.06405	0.461484		0.0710847	0.0563445	0.045754	0.0622302	0.0518169	0.0702285	2	2	51.79
Q6NUQ1	RAD50-interacting protein 1	RINT1	RINT1_HUMAN	0.0894926	1.064	6.82745e-05	√	0.492135	0.499603	0.47928	0.520951	0.518607	0.5256	3	3	122.85
Q9NVS9	Pyridoxine-5'-phosphate oxidase	PNPO	PNPO_HUMAN	0.0893603	1.0639	0.385941		5.87585	5.01478	6.39739	6.87716	6.1131	5.40244	8	8	481.11
P03897	NADH-ubiquinone oxidoreductase chain 3	MT-ND3	NU3M_HUMAN	0.089325	1.06387	0.0434608		1.66444	1.63215	1.49561	1.76367	1.59368	1.74093	2	2	95.3
O60568	Procollagen-lysine,2-oxoglutarate 5-dioxygenase 3	PLOD3	PLOD3_HUMAN	0.0892675	1.06383	0.508591		0.282941	0.314612	0.321434	0.267716	0.296998	0.412932	4	4	306.73
P63000	Ras-related C3 botulinum toxin substrate 1	RAC1	RAC1_HUMAN	0.0892187	1.06379	0.0833827		3.84779	4.06622	3.60454	4.14123	4.26991	3.84223	9	5	378.59
Q9Y3Z3-4	Isoform 4 of Deoxynucleoside triphosphate triphosphohydrolase SAMHD1	SAMHD1	SAMH1_HUMAN	0.0890026	1.06363	0.104278		6.48612	7.15864	6.44907	6.44675	7.33432	7.59141	13	13	670.8
Q99733	Nucleosome assembly protein 1-like 4	NAP1L4	NP1L4_HUMAN	0.0889445	1.06359	0.383809		7.88968	8.39056	9.50106	8.36257	10.6863	8.37194	9	8	479.5
P38117	Electron transfer flavoprotein subunit beta	ETFB	ETFB_HUMAN	0.0886587	1.06338	0.0050375	√	33.147	32.6337	30.9613	34.7685	33.0003	35.1049	16	16	774.42
Q99584	Protein S100-A13	S100A13	S10AD_HUMAN	0.0884869	1.06325	0.611127		3.8046	3.06976	4.33499	4.8009	4.10182	3.01568	6	6	245.24
P09622	Dihydrolipoyl dehydrogenase, mitochondrial	DLD	DLDH_HUMAN	0.0882883	1.06311	0.056548		12.826	13.9001	11.9959	13.0067	14.1849	13.974	14	14	721.26
Q9BUI4	DNA-directed RNA polymerase III subunit RPC3	POLR3C	RPC3_HUMAN	0.0882335	1.06307	0.583895		0.0374395	0.0322391	0.0180471	0.031765	0.0248066	0.0366869	1	1	56.93
O95400	CD2 antigen cytoplasmic tail-binding protein 2	CD2BP2	CD2B2_HUMAN	0.0877946	1.06274	0.406791		0.693076	0.753307	0.902109	0.921413	0.851865	0.722568	4	4	137.7
Q6UW02	Cytochrome P450 20A1	CYP20A1	CP20A_HUMAN	0.0877029	1.06268	0.244242		3.09113	3.11525	3.80913	3.43457	3.6972	3.51148	12	12	518.94
P56181	NADH dehydrogenase [ubiquinone] flavoprotein 3, mitochondrial	NDUFV3	NDUV3_HUMAN	0.0876833	1.06266	0.854139		0.436679	0.292367	0.624008	0.670571	0.518468	0.248802	2	2	50.06
P27144	Adenylate kinase 4, mitochondrial	AK4	KAD4_HUMAN	0.0872994	1.06238	0.444034		12.6255	13.1808	14.5504	13.5996	17.0578	12.2166	11	11	535.86
Q9H444;Q96CF2	Charged multivesicular body protein 4b	CHMP4B	CHM4B_HUMAN	0.0872382	1.06233	0.608089		5.23535	4.43023	6.58138	6.65819	6.23819	4.36332	8	7	417.71
O43493-2	Isoform TGN46 of Trans-Golgi network integral membrane protein 2	TGOLN2	TGON2_HUMAN	0.0868825	1.06207	0.619436		1.86076	1.58697	2.26138	2.40646	2.13943	1.51761	5	4	217.03
O43818	U3 small nucleolar RNA-interacting protein 2	RRP9	U3IP2_HUMAN	0.0858635	1.06132	0.300051		2.08477	1.9986	1.93266	2.12152	2.40618	1.85725	7	7	249.86
Q8WZA0	Protein LZIC	LZIC	LZIC_HUMAN	0.0857451	1.06124	0.588564		4.24951	3.47258	5.15715	4.72557	5.3718	3.57055	6	6	306.83
P57105	Synaptojanin-2-binding protein	SYNJ2BP	SYJ2B_HUMAN	0.0855294	1.06108	0.48613		1.06956	0.86649	0.928878	1.23899	0.869435	0.931493	3	3	143.69
Q14C86-4	Isoform 4 of GTPase-activating protein and VPS9 domain-containing protein 1	GAPVD1	GAPD1_HUMAN	0.0854763	1.06104	0.0379569		0.564437	0.588217	0.505636	0.586473	0.58495	0.588086	4	4	168.46
P35270	Sepiapterin reductase	SPR	SPRE_HUMAN	0.085006	1.06069	0.0842403		9.862	9.15185	9.49553	10.3306	10.3813	9.52779	10	10	654.35
Q14126	Desmoglein-2	DSG2	DSG2_HUMAN	0.0845245	1.06034	0.0622785		4.05769	4.1715	3.6957	4.19216	3.92846	4.5238	12	12	562.04
Q6ZNA5	Ferric-chelate reductase 1	FRRS1	FRRS1_HUMAN	0.0844121	1.06026	0.136213		0.0505192	0.0551745	0.0535863	0.0609075	0.0552353	0.0527348	2	2	51.78
Q8TCT9-5	Isoform 5 of Minor histocompatibility antigen H13	HM13	HM13_HUMAN	0.0843394	1.0602	0.182485		27.4137	27.4626	24.6421	25.7187	31.1192	27.4676	13	12	637.79
Q92896	Golgi apparatus protein 1	GLG1	GSLG1_HUMAN	0.0841511	1.06006	0.193548		25.2776	25.4767	29.6912	29.3871	28.5807	27.3094	41	40	2219.16
P15144	Aminopeptidase N	AN	AMPN_HUMAN	0.0838176	1.05982	0.0122171		16.7923	18.1854	16.9999	18.1698	17.6987	19.2183	30	29	1459.69
P62310	U6 snRNA-associated Sm-like protein LSm3	LSM3	LSM3_HUMAN	0.0835048	1.05959	0.577054		0.821836	0.744694	0.887518	1.10582	0.725161	0.769302	3	2	83.54
P08574	Cytochrome c1, heme protein, mitochondrial	CYC1	CY1_HUMAN	0.0833179	1.05945	0.239295		10.4271	10.8223	12.05	12.9442	11.2272	11.1077	10	9	428.4
Q8N5K1	CDGSH iron-sulfur domain-containing protein 2	CISD2	CISD2_HUMAN	0.0831832	1.05935	0.193493		12.6729	12.9515	14.0608	15.3512	13.4301	13.2593	7	7	393.89
P55072	Transitional endoplasmic reticulum ATPase	VCP	TERA_HUMAN	0.0830329	1.05924	0.0783882		104.613	105.533	99.7522	101.554	117.342	109.361	50	46	2492.72
O95954	Formimidoyltransferase-cyclodeaminase	FTCD	FTCD_HUMAN	0.082964	1.05919	0.0640186		9.74359	11.2785	9.89398	10.7645	11.0932	10.8883	16	16	759.36
Q9UKM7	Endoplasmic reticulum mannosyl-oligosaccharide 1,2-alpha-mannosidase	MAN1B1	MA1B1_HUMAN	0.0828721	1.05912	0.402435		0.153521	0.155709	0.149461	0.15874	0.189918	0.137152	1	1	52.8
P68104	Elongation factor 1-alpha 1	EEF1A1	EF1A1_HUMAN	0.082656	1.05897	0.532738		568.352	585.288	522.397	491.682	743.99	539.194	55	17	2708.85
O14976-2	Isoform 2 of Cyclin-G-associated kinase	GAK	GAK_HUMAN	0.082475	1.05883	0.554748		0.119268	0.106775	0.104661	0.0880948	0.137236	0.124829	4	3	188.37
O43399	Tumor protein D54	TPD52L2	TPD54_HUMAN	0.0822588	1.05867	0.479986		15.0468	12.8249	17.7374	17.4314	17.2288	13.6248	11	11	565.41
Q15019	Septin-2	SEPT2	SEPT2_HUMAN	0.082157	1.0586	0.0990585		7.47766	8.5577	7.68225	8.00788	7.9883	9.11128	13	13	718.36
P30044-2	Isoform Cytoplasmic+peroxisomal of Peroxiredoxin-5, mitochondrial	PRDX5	PRDX5_HUMAN	0.0815672	1.05817	0.273519		12.3683	10.8458	12.487	13.626	12.7438	11.408	8	8	351.15
P27348	14-3-3 protein theta	YWHAQ	1433T_HUMAN	0.08141	1.05805	0.130754		30.7157	27.589	28.523	31.9941	31.1734	28.7008	25	14	1322.28
P47755	F-actin-capping protein subunit alpha-2	CAPZA2	CAZA2_HUMAN	0.0812768	1.05795	0.0844405		4.18599	4.15471	3.55587	4.02653	4.1991	4.36041	10	7	487.65
Q13795	ADP-ribosylation factor-related protein 1	ARFRP1	ARFRP_HUMAN	0.0811214	1.05784	0.210185		0.292232	0.298428	0.236155	0.277445	0.280957	0.316236	3	3	95.44
Q96HE7	ERO1-like protein alpha	ERO1L	ERO1A_HUMAN	0.0811039	1.05783	0.0738324		18.5071	20.2493	19.1539	19.0636	21.5369	20.6586	21	20	1062.82
P53680	AP-2 complex subunit sigma	AP2S1	AP2S1_HUMAN	0.081008	1.05776	0.154672		0.677764	0.671429	0.619428	0.685371	0.622669	0.774282	2	2	73.22
Q53GS9	U4/U6.U5 tri-snRNP-associated protein 2	USP39	SNUT2_HUMAN	0.0810046	1.05775	0.17682		3.55752	3.53515	3.45856	3.34979	4.11252	3.6983	10	10	443.6
Q93050-1	Isoform 2 of V-type proton ATPase 116 kDa subunit a isoform 1	ATP6V0A1	VPP1_HUMAN	0.0809027	1.05768	0.0605485		0.888409	0.985283	0.829221	0.937273	0.958456	0.963087	8	8	376.03
Q8WW12	PEST proteolytic signal-containing nuclear protein	PCNP	PCNP_HUMAN	0.0801684	1.05714	0.455677		1.69548	1.48259	1.95537	2.0071	1.87235	1.54732	4	4	280.74
Q9BZD2-2	Isoform 2 of Equilibrative nucleoside transporter 3	SLC29A3	S29A3_HUMAN	0.0801634	1.05714	0.282856		0.0451254	0.0366416	0.0339578	0.0386941	0.0431604	0.0404827	1	1	37.27
Q9Y4R8	Telomere length regulation protein TEL2 homolog	TELO2	TELO2_HUMAN	0.0801614	1.05714	0.0722428		0.0840502	0.0799485	0.0749051	0.0804455	0.0888194	0.083289	2	2	105.32
Q6NUQ4	Transmembrane protein 214	TMEM214	TM214_HUMAN	0.0798851	1.05693	0.113098		5.47518	5.50893	5.38646	5.28063	6.24186	5.78011	13	13	578.75
O43314-2	Isoform 2 of Inositol hexakisphosphate and diphosphoinositol-pentakisphosphate kinase 2	PPIP5K2	VIP2_HUMAN	0.0793337	1.05653	0.336826		0.0626994	0.0744677	0.0503727	0.0625738	0.0669362	0.0686314	3	3	95.3
Q14247-3	Isoform 3 of Src substrate cortactin	CTTN	SRC8_HUMAN	0.0791622	1.0564	0.325642		5.28882	4.93128	5.63588	5.67039	6.15328	4.92667	13	13	602.71
P48509	CD151 antigen	CD151	CD151_HUMAN	0.0788762	1.05619	0.143833		0.519468	0.462163	0.441928	0.510822	0.461587	0.531146	1	1	53.53
Q96KP1	Exocyst complex component 2	EXOC2	EXOC2_HUMAN	0.0787484	1.0561	0.0265798		0.103242	0.109826	0.105453	0.106026	0.115334	0.11503	1	1	63.56
P46734-2	Isoform 1 of Dual specificity mitogen-activated protein kinase kinase 3	MAP2K3	MP2K3_HUMAN	0.0784374	1.05587	0.119269		1.47895	1.56067	1.30768	1.53646	1.42293	1.63081	5	5	308.26
Q14728	Major facilitator superfamily domain-containing protein 10	MFSD10	MFS10_HUMAN	0.0784161	1.05586	0.334937		0.107387	0.130821	0.142488	0.138908	0.137543	0.125511	1	1	49.85
P51659	Peroxisomal multifunctional enzyme type 2	HSD17B4	DHB4_HUMAN	0.0783329	1.0558	0.150686		37.655	38.9044	34.5085	35.8911	42.5025	38.8715	27	27	1601.17
Q587I9	Vesicle transport protein SFT2C	SFT2D3	SFT2C_HUMAN	0.0782466	1.05573	0.213782		0.973692	0.965863	0.84842	1.07687	0.878763	0.987731	3	3	150.37
Q99614	Tetratricopeptide repeat protein 1	TTC1	TTC1_HUMAN	0.0782079	1.05571	0.602045		1.13669	0.819778	1.29418	1.23076	1.29646	0.904511	6	6	271.01
Q13952-6	Isoform 6 of Nuclear transcription factor Y subunit gamma	NFYC	NFYC_HUMAN	0.0781595	1.05567	0.572226		0.0724526	0.0891269	0.10043	0.0869767	0.0747592	0.11486	1	1	66.8
Q9UMX5	Neudesin	NENF	NENF_HUMAN	0.0780999	1.05563	0.50476		0.101893	0.0826595	0.0975946	0.119451	0.0936671	0.0847245	1	1	32.81
Q92973-2	Isoform 2 of Transportin-1	TNPO1	TNPO1_HUMAN	0.0780792	1.05561	0.135127		7.43494	7.83422	7.05549	7.11331	8.42923	8.02362	17	12	814.58
Q9NVD7	Alpha-parvin	PARVA	PARVA_HUMAN	0.0780708	1.05561	0.171191		1.36864	1.2049	1.24507	1.44565	1.23464	1.35066	8	7	391.35
Q9C0C9	Ubiquitin-conjugating enzyme E2 O	UBE2O	UBE2O_HUMAN	0.0778973	1.05548	0.239648		0.995351	1.06937	0.836548	0.926759	1.05915	1.07632	9	9	354.16
P48426	Phosphatidylinositol 5-phosphate 4-kinase type-2 alpha	PIP4K2A	PI42A_HUMAN	0.07784	1.05544	0.392791		0.55916	0.436584	0.394623	0.498109	0.433144	0.536192	6	4	241.24
Q15149-7	Isoform 7 of Plectin	PLEC	PLEC_HUMAN	0.077761	1.05538	0.112683		16.786	15.4388	15.7777	17.8733	16.8329	15.9547	83	80	3788.99
Q6ZXV5-2	Isoform 2 of Transmembrane and TPR repeat-containing protein 3	TMTC3	TMTC3_HUMAN	0.0774503	1.05515	0.0516979		0.497741	0.480616	0.431726	0.501777	0.49442	0.491654	7	4	314.99
Q8WUK0-2	Isoform 2 of Phosphatidylglycerophosphatase and protein-tyrosine phosphatase 1	PTPMT1	PTPM1_HUMAN	0.0774215	1.05513	0.240967		0.259841	0.283477	0.220608	0.282373	0.272324	0.251344	2	2	131.17
Q86WR0	Coiled-coil domain-containing protein 25	CCDC25	CCD25_HUMAN	0.0773036	1.05504	0.255146		0.106062	0.0982794	0.0830857	0.104146	0.0911935	0.107908	1	1	28.06
Q6YN16	Hydroxysteroid dehydrogenase-like protein 2	HSDL2	HSDL2_HUMAN	0.0772834	1.05503	0.270195		4.33677	5.34136	4.73998	4.48418	5.26936	5.45799	15	13	703.95
O43676	NADH dehydrogenase [ubiquinone] 1 beta subcomplex subunit 3	NDUFB3	NDUB3_HUMAN	0.0772408	1.055	0.222098		2.80019	2.4918	2.65752	3.09426	2.59771	2.69475	3	3	98.53
Q99598	Translin-associated protein X	TSNAX	TSNAX_HUMAN	0.077013	1.05483	0.110522		0.862405	0.895873	0.811263	0.899939	0.82142	0.989075	5	4	231.81
P00403	Cytochrome c oxidase subunit 2	MT-CO2	COX2_HUMAN	0.0765965	1.05453	0.109747		33.591	33.0848	33.4074	37.9992	34.1801	33.3612	8	8	386.11
P51970	NADH dehydrogenase [ubiquinone] 1 alpha subcomplex subunit 8	NDUFA8	NDUA8_HUMAN	0.0765231	1.05447	0.562479		2.73923	2.73525	4.16904	3.4702	3.85397	2.84466	6	6	210.77
Q9UBQ7	Glyoxylate reductase/hydroxypyruvate reductase	GRHPR	GRHPR_HUMAN	0.0764825	1.05444	0.146962		4.77137	5.38291	4.92941	4.87172	5.69465	5.33855	7	7	429.14
Q96IX5	Up-regulated during skeletal muscle growth protein 5	USMG5	USMG5_HUMAN	0.0764311	1.05441	0.0841957		8.84443	8.27228	8.18939	9.48179	8.44695	8.75419	2	2	194.51
Q9UMZ2-6	Isoform 5 of Synergin gamma	SYNRG	SYNRG_HUMAN	0.0762541	1.05428	0.0135934		0.133481	0.146411	0.136171	0.144262	0.143267	0.151117	1	1	15.31
P20645	Cation-dependent mannose-6-phosphate receptor	M6PR	MPRD_HUMAN	0.0760666	1.05414	0.490522		2.38457	2.0802	2.52729	2.93147	2.32475	2.11439	2	2	156.71
O75208	Ubiquinone biosynthesis protein COQ9, mitochondrial	COQ9	COQ9_HUMAN	0.0758711	1.054	0.335152		0.808334	0.895768	0.952534	0.863509	1.05969	0.876884	4	4	203.24
O94925	Glutaminase kidney isoform, mitochondrial	GLS	GLSK_HUMAN	0.0757944	1.05394	0.526137		0.0796426	0.106168	0.0814918	0.112489	0.0766491	0.0925829	15	1	645.03
Q8NHG7	Small VCP/p97-interacting protein	SVIP	SVIP_HUMAN	0.0755483	1.05376	0.0844797		1.31242	1.19932	1.18151	1.34889	1.21151	1.3314	2	1	79.44
O75165	DnaJ homolog subfamily C member 13	DNAJC13	DJC13_HUMAN	0.0754327	1.05368	0.109127		0.172626	0.150194	0.153323	0.172304	0.15961	0.169788	5	4	251.05
P22352	Glutathione peroxidase 3	GPX3	GPX3_HUMAN	0.0752513	1.05354	0.811296		0.0754889	0.127404	0.147776	0.0883307	0.0947975	0.186317	1	1	26.58
P29122-2	Isoform PACE4A-II of Proprotein convertase subtilisin/kexin type 6	PCSK6	PCSK6_HUMAN	0.0752277	1.05353	0.481489		0.0665262	0.0754613	0.0779144	0.0649111	0.0722759	0.0944858	2	2	117.02
O60725	Protein-S-isoprenylcysteine O-methyltransferase	ICMT	ICMT_HUMAN	0.0752108	1.05351	0.193244		0.255746	0.241092	0.214704	0.25317	0.225299	0.27115	1	1	38.34
Q07021	Complement component 1 Q subcomponent-binding protein, mitochondrial	C1QBP	C1QBP_HUMAN	0.0750049	1.05336	0.635144		69.2357	72.917	86.6476	69.901	103.844	67.2657	9	9	533.44
Q709F0	Acyl-CoA dehydrogenase family member 11	ACAD11	ACD11_HUMAN	0.0749277	1.05331	0.191971		0.490498	0.479179	0.393465	0.45884	0.46426	0.512707	4	3	201.02
P62873	Guanine nucleotide-binding protein G(I)/G(S)/G(T) subunit beta-1	GNB1	GBB1_HUMAN	0.0748015	1.05322	0.14273		7.73003	8.62627	8.3423	7.91225	9.14099	8.95972	10	7	542.16
Q9UJW0-2	Isoform 2 of Dynactin subunit 4	DCTN4	DCTN4_HUMAN	0.0747192	1.05316	0.0815304		0.382356	0.447362	0.388805	0.416781	0.428987	0.437527	3	3	112.58
Q9NZJ7-2	Isoform 2 of Mitochondrial carrier homolog 1	MTCH1	MTCH1_HUMAN	0.074706	1.05315	0.267976		1.8561	2.06515	1.95439	1.77602	2.14735	2.26453	3	3	128.38
Q9H4I9	Essential MCU regulator, mitochondrial	SMDT1	EMRE_HUMAN	0.0743242	1.05287	0.353245		0.0858342	0.0883282	0.1086	0.10071	0.0890097	0.107992	1	1	47.99
Q99943	1-acyl-sn-glycerol-3-phosphate acyltransferase alpha	AGPAT1	PLCA_HUMAN	0.0742017	1.05278	0.693395		0.460974	0.624917	0.615366	0.430937	0.760736	0.599373	2	1	80.5
P60953	Cell division control protein 42 homolog	CDC42	CDC42_HUMAN	0.07407	1.05268	0.0206584		8.36778	7.80399	7.99538	8.58137	8.308	8.55096	8	7	401.31
B2RUZ4	Small integral membrane protein 1	SMIM1	SMIM1_HUMAN	0.0739025	1.05256	0.528523		0.64097	0.517602	0.631345	0.708308	0.667088	0.508599	1	1	67.15
P21283	V-type proton ATPase subunit C 1	ATP6V1C1	VATC1_HUMAN	0.0738856	1.05255	0.0628366		2.32952	2.45159	2.52501	2.65045	2.53134	2.50824	11	9	460.31
Q9UN37	Vacuolar protein sorting-associated protein 4A	VPS4A	VPS4A_HUMAN	0.0738509	1.05252	0.207168		2.63171	2.72608	2.95809	2.92844	2.63108	3.19314	10	6	416.41
P42330	Aldo-keto reductase family 1 member C3	AKR1C3	AK1C3_HUMAN	0.0736578	1.05238	0.255642		22.6611	28.0262	24.9467	24.0942	26.2874	29.2141	21	9	1012.31
Q4G176	Acyl-CoA synthetase family member 3, mitochondrial	ACSF3	ACSF3_HUMAN	0.0735591	1.05231	0.277602		0.231204	0.294425	0.235963	0.250764	0.255897	0.29477	5	5	185.21
Q9UHQ4	B-cell receptor-associated protein 29	BCAP29	BAP29_HUMAN	0.0725057	1.05154	0.434577		0.0247106	0.0303473	0.018334	0.0248388	0.0255692	0.0267666	1	1	38.67
O14521-2	Isoform 2 of Succinate dehydrogenase [ubiquinone] cytochrome b small subunit, mitochondrial	SDHD	DHSD_HUMAN	0.0722169	1.05133	0.54298		0.426686	0.617725	0.477571	0.444108	0.505795	0.650204	1	1	48.54
P00390-2	Isoform Cytoplasmic of Glutathione reductase, mitochondrial	GSR	GSHR_HUMAN	0.0719744	1.05115	0.0341343		13.7967	13.5193	12.2245	13.6026	14.0395	13.9212	15	15	708.32
O95155-2	Isoform 2 of Ubiquitin conjugation factor E4 B	UBE4B	UBE4B_HUMAN	0.0717355	1.05098	0.251749		0.317276	0.293266	0.312248	0.295922	0.360899	0.313012	5	5	183.82
Q04323	UBX domain-containing protein 1	UBXN1	UBXN1_HUMAN	0.0716571	1.05092	0.702546		1.8513	1.71808	2.14174	1.90725	2.59927	1.49542	3	3	240.75
P51649	Succinate-semialdehyde dehydrogenase, mitochondrial	ALDH5A1	SSDH_HUMAN	0.0715652	1.05086	0.0304714		10.7598	11.2441	9.8207	10.9413	10.9903	11.5115	16	15	688.46
P49591	Serine--tRNA ligase, cytoplasmic	SARS	SYSC_HUMAN	0.0715168	1.05082	0.03614		13.7253	14.7765	13.1953	13.967	14.9844	14.8649	18	18	866.59
Q86VM9-2;Q86VM9	Isoform 2 of Zinc finger CCCH domain-containing protein 18	ZC3H18	ZCH18_HUMAN	0.0714778	1.05079	0.38558		1.07025	0.962275	1.20795	1.21661	1.17658	1.01188	6	6	220.96
P00414	Cytochrome c oxidase subunit 3	MT-CO3	COX3_HUMAN	0.0710144	1.05046	0.250795		0.328372	0.289228	0.256631	0.282975	0.305975	0.32939	2	2	58.33
Q7LBR1	Charged multivesicular body protein 1b	CHMP1B	CHM1B_HUMAN	0.0705442	1.05011	0.362943		0.265204	0.261056	0.267547	0.321131	0.266638	0.245818	1	1	26.64
O15118	Niemann-Pick C1 protein	NPC1	NPC1_HUMAN	0.0699493	1.04968	0.271143		1.35666	1.18813	1.1417	1.4198	1.16864	1.28119	5	5	191.59
Q9NUQ6	SPATS2-like protein	SPATS2L	SPS2L_HUMAN	0.0694736	1.04933	0.405152		0.131309	0.101933	0.128546	0.130061	0.111442	0.138134	11	1	580.65
Q8IXI1	Mitochondrial Rho GTPase 2	RHOT2	MIRO2_HUMAN	0.0692366	1.04916	0.412456		2.71496	2.20399	1.93393	2.47342	2.55981	2.15655	11	8	442.31
P35080-2	Isoform IIb of Profilin-2	PFN2	PROF2_HUMAN	0.069192	1.04913	0.611064		0.165654	0.116015	0.122339	0.177607	0.122109	0.124141	5	1	241.59
P37059	Estradiol 17-beta-dehydrogenase 2	HSD17B2	DHB2_HUMAN	0.0688609	1.04889	0.126377		1.59702	1.67265	1.50563	1.51324	1.74644	1.74908	9	8	398.35
P07237	Protein disulfide-isomerase	P4HB	PDIA1_HUMAN	0.0686228	1.04872	0.00865656	√	313.047	308.177	293.631	325.831	307.759	325.833	44	44	2189.75
Q15906	Vacuolar protein sorting-associated protein 72 homolog	VPS72	VPS72_HUMAN	0.068513	1.04864	0.654005		0.0558859	0.044771	0.0526497	0.0681026	0.0413441	0.0513159	1	1	30.16
Q8NBN3	Transmembrane protein 87A	TMEM87A	TM87A_HUMAN	0.0684655	1.0486	0.292142		1.55087	1.70238	1.54451	1.4713	1.87653	1.6831	8	8	328.21
Q9BSE5	Agmatinase, mitochondrial	AGMAT	SPEB_HUMAN	0.0684074	1.04856	0.518642		67.8024	68.1209	75.8543	67.3371	90.0662	64.6579	17	17	881.17
P40763-2	Isoform Del-701 of Signal transducer and activator of transcription 3	STAT3	STAT3_HUMAN	0.0682837	1.04847	0.123229		5.93634	6.38022	5.44088	5.74957	6.40979	6.45876	12	12	618.77
Q15643	Thyroid receptor-interacting protein 11	TRIP11	TRIPB_HUMAN	0.0682307	1.04843	0.0898677		0.107685	0.114239	0.107214	0.120275	0.1051	0.119703	6	2	221.46
Q9BQ49	Small integral membrane protein 7	SMIM7	SMIM7_HUMAN	0.0681273	1.04835	0.309966		0.0168402	0.0168799	0.0134999	0.0168851	0.0175298	0.0150884	1	1	44.37
Q9BUQ8	Probable ATP-dependent RNA helicase DDX23	DDX23	DDX23_HUMAN	0.0678328	1.04814	0.18477		1.6179	1.46105	1.42374	1.4936	1.47538	1.75048	9	9	350.24
P60002	Transcription elongation factor 1 homolog	ELOF1	ELOF1_HUMAN	0.067647	1.04801	0.402779		0.460163	0.555932	0.565371	0.560209	0.474648	0.622528	1	1	41.08
O60306	Intron-binding protein aquarius	AQR	AQR_HUMAN	0.0676134	1.04798	0.109994		0.718588	0.792776	0.682901	0.752538	0.804089	0.742922	8	7	273.06
P53004	Biliverdin reductase A	BLVRA	BIEA_HUMAN	0.0675059	1.0479	0.197267		9.6117	8.69105	7.67903	9.39682	8.59882	9.23075	10	10	390.55
O75083	WD repeat-containing protein 1	WDR1	WDR1_HUMAN	0.0674295	1.04785	0.0895937		43.4798	48.2174	43.0384	43.7513	47.9744	49.4566	30	30	1440.86
O75746	Calcium-binding mitochondrial carrier protein Aralar1	SLC25A12	CMC1_HUMAN	0.0674123	1.04784	0.190479		0.182459	0.182266	0.153751	0.185521	0.165603	0.192154	12	4	575.81
Q9Y223-5	Isoform 5 of Bifunctional UDP-N-acetylglucosamine 2-epimerase/N-acetylmannosamine kinase	GNE	GLCNE_HUMAN	0.0670033	1.04754	0.0768657		1.15108	1.10729	1.0694	1.09595	1.12335	1.26667	9	9	380.21
Q8TC12	Retinol dehydrogenase 11	RDH11	RDH11_HUMAN	0.0666089	1.04725	0.097451		5.22415	5.53945	4.60373	5.32567	5.22643	5.54138	9	8	570.62
Q9H3N1	Thioredoxin-related transmembrane protein 1	TMX1	TMX1_HUMAN	0.0664683	1.04715	0.106932		3.63754	3.63771	3.46803	4.0373	3.63451	3.57802	8	8	273.04
P13798	Acylamino-acid-releasing enzyme	ACPH	ACPH_HUMAN	0.0663107	1.04704	0.13921		3.52787	3.42498	2.93359	3.40026	3.30497	3.64622	11	10	490.77
Q9HBR0	Putative sodium-coupled neutral amino acid transporter 10	SLC38A10	S38AA_HUMAN	0.0662433	1.04699	0.186782		0.222288	0.200287	0.237471	0.229586	0.224657	0.236818	5	5	287.42
P49589	Cysteine--tRNA ligase, cytoplasmic	CARS	SYCC_HUMAN	0.0660285	1.04683	0.105047		0.82856	0.880524	0.769455	0.872172	0.798761	0.923679	9	8	310.96
Q9BQ69	O-acetyl-ADP-ribose deacetylase MACROD1	MACROD1	MACD1_HUMAN	0.0658969	1.04674	0.210939		0.331115	0.375353	0.320063	0.380457	0.322045	0.372003	2	2	152.63
Q14257	Reticulocalbin-2	RCN2	RCN2_HUMAN	0.0654038	1.04638	0.559296		7.66071	8.35811	10.66	8.95088	10.9811	7.98419	9	9	551.44
P68036	Ubiquitin-conjugating enzyme E2 L3	UBE2L3	UB2L3_HUMAN	0.0651097	1.04616	0.538857		7.77988	6.9511	9.97217	8.94175	9.54379	7.35802	8	8	364.02
Q13445	Transmembrane emp24 domain-containing protein 1	TMED1	TMED1_HUMAN	0.0648864	1.046	0.265859		1.8819	1.79993	2.02205	2.19381	1.85983	1.91263	3	3	119.9
P38919	Eukaryotic initiation factor 4A-III	EIF4A3	IF4A3_HUMAN	0.064822	1.04596	0.271714		21.0483	22.5136	21.885	19.7318	23.7113	25.0115	24	19	1151.25
Q8WUM4	Programmed cell death 6-interacting protein	PDCD6IP	PDC6I_HUMAN	0.0645939	1.04579	0.0539903		13.0615	12.6717	11.5996	12.7335	13.4013	12.9075	27	27	1253.42
O95167	NADH dehydrogenase [ubiquinone] 1 alpha subcomplex subunit 3	NDUFA3	NDUA3_HUMAN	0.0643378	1.0456	0.722955		0.424251	0.619687	0.762698	0.434526	0.739228	0.715273	1	1	29.44
O14828	Secretory carrier-associated membrane protein 3	SCAMP3	SCAM3_HUMAN	0.064276	1.04556	0.00562545	√	2.04997	2.09801	1.93598	2.10539	2.05608	2.19967	4	4	298.32
P31153	S-adenosylmethionine synthase isoform type-2	MAT2A	METK2_HUMAN	0.0642725	1.04556	0.490743		1.13447	1.16918	0.945804	0.999991	1.35594	1.04156	7	3	476.56
P20962	Parathymosin	PTMS	PTMS_HUMAN	0.0641553	1.04547	0.623301		3.92663	3.34141	4.70798	4.86111	4.37036	3.28915	1	1	50.35
Q02641-3	Isoform 3 of Voltage-dependent L-type calcium channel subunit beta-1	CACNB1	CACB1_HUMAN	0.0633772	1.04491	0.749602		0.668544	0.590435	0.814819	0.851681	0.818689	0.49656	1	1	19.52
Q13423	NAD(P) transhydrogenase, mitochondrial	NNT	NNTM_HUMAN	0.0632929	1.04485	0.114057		13.328	14.2244	12.371	13.1523	14.6976	13.864	29	26	1271.2
Q9BXB4	Oxysterol-binding protein-related protein 11	OSBPL11	OSB11_HUMAN	0.0632306	1.0448	0.29372		0.098521	0.0883527	0.0770403	0.084179	0.0909015	0.100658	1	1	47.82
O75880	Protein SCO1 homolog, mitochondrial	SCO1	SCO1_HUMAN	0.0631999	1.04478	0.449682		0.235863	0.210542	0.242604	0.253464	0.262783	0.203616	1	1	37.07
P38606	V-type proton ATPase catalytic subunit A	ATP6V1A	VATA_HUMAN	0.0628096	1.0445	0.0837757		9.79547	10.4812	9.23264	9.86755	9.85238	11.1024	17	17	764.64
P25325	3-mercaptopyruvate sulfurtransferase	MPST	THTM_HUMAN	0.0625199	1.04429	0.0493315		11.9751	12.0735	12.6769	13.1199	12.3924	12.8397	15	14	810.15
Q99714	3-hydroxyacyl-CoA dehydrogenase type-2	HSD17B10	HCD2_HUMAN	0.062474	1.04425	0.165014		16.0223	16.1245	14.7466	14.9403	17.6418	16.3865	16	16	859.3
P49748-2	Isoform 2 of Very long-chain specific acyl-CoA dehydrogenase, mitochondrial	ACADVL	ACADV_HUMAN	0.0623713	1.04418	0.143685		20.8308	22.6244	20.219	21.4497	20.5635	24.4742	17	17	1030.02
Q8WUD4	Coiled-coil domain-containing protein 12	CCDC12	CCD12_HUMAN	0.0622765	1.04411	0.799532		0.893874	0.697708	0.589182	0.556765	1.07721	0.642991	1	1	40.74
O15460-2	Isoform IIa of Prolyl 4-hydroxylase subunit alpha-2	P4HA2	P4HA2_HUMAN	0.0619658	1.04389	0.43382		0.671405	0.795702	0.79143	0.65889	0.824409	0.874358	5	5	304.61
P25815	Protein S100-P	S100P	S100P_HUMAN	0.0619356	1.04387	0.588009		8.00216	7.00262	8.39478	9.99761	7.60469	6.8237	2	2	121.52
Q96S55-2	Isoform 2 of ATPase WRNIP1	WRNIP1	WRIP1_HUMAN	0.061793	1.04376	0.31815		1.45213	1.70927	1.66822	1.4824	1.7987	1.75987	8	8	324.62
Q14678-2	Isoform 2 of KN motif and ankyrin repeat domain-containing protein 1	KANK1	KANK1_HUMAN	0.0615925	1.04362	0.296998		0.489799	0.525902	0.549542	0.608433	0.503732	0.521349	4	4	203.9
Q9Y2H6-2	Isoform 2 of Fibronectin type-III domain-containing protein 3A	FNDC3A	FND3A_HUMAN	0.0615865	1.04361	0.910536		0.44923	0.474397	0.396302	0.322061	0.699788	0.355645	2	2	73.04
Q99459	Cell division cycle 5-like protein	CDC5L	CDC5L_HUMAN	0.0612253	1.04335	0.130064		3.76476	3.69785	3.57208	3.77116	4.1157	3.62621	14	14	520.84
Q9BY77	Polymerase delta-interacting protein 3	POLDIP3	PDIP3_HUMAN	0.0609209	1.04313	0.020441		0.921608	0.900598	0.907396	0.930294	0.975505	0.941535	8	7	328.07
P55084-2	Isoform 2 of Trifunctional enzyme subunit beta, mitochondrial	HADHB	ECHB_HUMAN	0.0608119	1.04305	0.090382		49.9739	55.9569	49.1595	51.682	52.4363	57.6489	31	30	1708.48
Q96JJ3	Engulfment and cell motility protein 2	ELMO2	ELMO2_HUMAN	0.0607129	1.04298	0.583326		0.114756	0.0967361	0.120158	0.136415	0.115419	0.0940709	2	2	47.54
P61026	Ras-related protein Rab-10	RAB10	RAB10_HUMAN	0.0604254	1.04277	0.0356151		5.07503	4.77725	4.7813	4.97539	4.90132	5.38278	13	8	672.49
O60218	Aldo-keto reductase family 1 member B10	AKR1B10	AK1BA_HUMAN	0.0601432	1.04257	0.136895		17.0308	15.6453	14.0983	16.1029	15.7528	16.9097	18	18	851.57
Q02252	Methylmalonate-semialdehyde dehydrogenase [acylating], mitochondrial	ALDH6A1	MMSA_HUMAN	0.0598003	1.04232	0.313045		21.4803	26.4813	22.88	22.5922	23.5724	27.6751	24	24	1230.13
P03928	ATP synthase protein 8	MT-ATP8	ATP8_HUMAN	0.0597071	1.04225	0.396071		3.77702	3.58441	4.05656	4.5055	3.83907	3.55587	2	2	64.67
Q9NX00	Transmembrane protein 160	TMEM160	TM160_HUMAN	0.0595748	1.04216	0.469022		0.138677	0.148262	0.104513	0.141561	0.146487	0.119907	1	1	18.46
Q06587-2	Isoform 2 of E3 ubiquitin-protein ligase RING1	RING1	RING1_HUMAN	0.0595739	1.04216	0.354064		0.242975	0.230148	0.213406	0.270152	0.208586	0.236733	3	1	146.68
P78509-3	Isoform 3 of Reelin	RELN	RELN_HUMAN	0.0593488	1.042	0.487315		0.0502961	0.0376614	0.0427363	0.0390159	0.0448874	0.0522792	1	1	15.48
Q9UIJ7	GTP:AMP phosphotransferase AK3, mitochondrial	AK3	KAD3_HUMAN	0.059193	1.04188	0.300625		18.2954	18.5493	20.7422	22.0428	18.958	18.998	18	15	746.35
Q10471	Polypeptide N-acetylgalactosaminyltransferase 2	GALNT2	GALT2_HUMAN	0.0586808	1.04151	0.557041		4.46523	5.22352	4.58527	3.87063	5.31296	5.68299	13	12	523.92
Q9Y3A5	Ribosome maturation protein SBDS	SBDS	SBDS_HUMAN	0.058578	1.04144	0.119651		5.07364	5.02828	4.37246	5.15124	5.0357	4.88724	11	10	444.53
Q96QK1	Vacuolar protein sorting-associated protein 35	VPS35	VPS35_HUMAN	0.0584496	1.04135	0.0967223		15.8441	14.6867	13.4449	15.3343	15.0769	15.3827	24	23	1346.63
P09210	Glutathione S-transferase A2	GSTA2	GSTA2_HUMAN	0.0582267	1.04119	0.334607		1.69206	1.93922	2.05731	1.93877	1.79262	2.19149	9	3	293.11
P17858	6-phosphofructokinase, liver type	PFKL	K6PL_HUMAN	0.0580318	1.04104	0.237311		16.0075	18.0618	17.0035	16.3887	16.8288	19.9515	25	24	1118.33
Q9Y4C2	Protein FAM115A	FAM115A	F115A_HUMAN	0.0577529	1.04084	0.480861		1.9347	1.59771	1.39593	1.90087	1.46302	1.76574	10	10	392.29
Q9BY32	Inosine triphosphate pyrophosphatase	ITPA	ITPA_HUMAN	0.0575904	1.04073	0.502565		5.33178	5.52338	5.6708	5.70363	6.68461	4.81076	7	7	325.42
Q8IYB3	Serine/arginine repetitive matrix protein 1	SRRM1	SRRM1_HUMAN	0.0575589	1.0407	0.841759		2.61927	2.55523	3.2918	2.59643	4.16164	2.05282	5	5	165.43
P26885	Peptidyl-prolyl cis-trans isomerase FKBP2	FKBP2	FKBP2_HUMAN	0.0569661	1.04028	0.310086		2.44925	2.54648	2.8403	2.71851	2.43803	2.99509	4	4	165.02
P33240-2	Isoform 2 of Cleavage stimulation factor subunit 2	CSTF2	CSTF2_HUMAN	0.0568048	1.04016	0.483273		0.920898	0.824456	1.0784	1.10341	0.952525	0.88122	7	4	219.72
Q9P035	Very-long-chain (3R)-3-hydroxyacyl-[acyl-carrier protein] dehydratase 3	PTPLAD1	HACD3_HUMAN	0.0567352	1.04011	0.129133		15.9873	15.0695	14.4879	14.7682	16.7618	15.8415	11	11	499.41
P30153;P30154-5	Serine/threonine-protein phosphatase 2A 65 kDa regulatory subunit A alpha isoform	PPP2R1A	2AAA_HUMAN	0.0563868	1.03986	0.125719		17.5756	18.1682	17.0805	16.9793	19.6278	18.3227	22	20	1137.22
Q9UHY7	Enolase-phosphatase E1	ENOPH1	ENOPH_HUMAN	0.0561846	1.03971	0.0993566		1.62555	1.57263	1.50664	1.71333	1.5071	1.67121	5	5	274.24
Q92887	Canalicular multispecific organic anion transporter 1	ABCC2	MRP2_HUMAN	0.0561555	1.03969	0.188226		1.18684	1.34245	1.24883	1.22236	1.25782	1.4479	10	10	392.96
P50053	Ketohexokinase	KHK	KHK_HUMAN	0.0557452	1.0394	0.265234		0.0424388	0.0463997	0.0353665	0.0440313	0.0415715	0.0434953	3	1	163.94
P36507	Dual specificity mitogen-activated protein kinase kinase 2	MAP2K2	MP2K2_HUMAN	0.055637	1.03932	0.136299		1.86615	1.898	1.95443	2.08812	1.9817	1.87361	18	10	793.01
P16152	Carbonyl reductase [NADPH] 1	CBR1	CBR1_HUMAN	0.055445	1.03918	0.330998		1.87	2.09373	1.92081	2.09199	1.75565	2.26744	6	6	304.5
Q8IZL8	Proline-, glutamic acid- and leucine-rich protein 1	PELP1	PELP1_HUMAN	0.0552102	1.03901	0.290396		2.58937	2.61721	2.55191	2.52053	3.02533	2.51529	12	11	574.65
Q9NS69	Mitochondrial import receptor subunit TOM22 homolog	TOMM22	TOM22_HUMAN	0.055175	1.03899	0.828364		10.7313	14.2878	15.7051	9.8252	19.8377	12.6489	9	9	489.43
Q9NUQ7	Ufm1-specific protease 2	UFSP2	UFSP2_HUMAN	0.0547262	1.03866	0.658216		0.294056	0.450598	0.330125	0.287135	0.450767	0.37843	3	3	126.36
P26440	Isovaleryl-CoA dehydrogenase, mitochondrial	IVD	IVD_HUMAN	0.0546889	1.03864	0.0357389		3.13765	3.16328	2.98936	3.25579	3.01618	3.37725	11	10	476.59
P45985	Dual specificity mitogen-activated protein kinase kinase 4	MAP2K4	MP2K4_HUMAN	0.0542616	1.03833	0.00954019	√	1.2317	1.26125	1.26991	1.28184	1.30845	1.31679	7	7	304.43
O95202	LETM1 and EF-hand domain-containing protein 1, mitochondrial	LETM1	LETM1_HUMAN	0.0541228	1.03823	0.11417		10.4518	11.1069	10.7054	10.6352	11.916	10.9463	26	26	1162.94
Q9NP79	Vacuolar protein sorting-associated protein VTA1 homolog	VTA1	VTA1_HUMAN	0.0539762	1.03812	0.0790689		3.08225	2.85763	2.86098	3.04877	3.13031	2.95729	6	6	265.68
P46019	Phosphorylase b kinase regulatory subunit alpha, liver isoform	PHKA2	KPB2_HUMAN	0.0536603	1.03789	0.428143		0.105678	0.077356	0.0762869	0.0911206	0.091899	0.0861279	1	1	15.48
Q8TBA6	Golgin subfamily A member 5	GOLGA5	GOGA5_HUMAN	0.053633	1.03788	0.102996		0.33509	0.382668	0.354111	0.358249	0.381931	0.372286	5	5	227.72
Q96HC4	PDZ and LIM domain protein 5	PDLIM5	PDLI5_HUMAN	0.053382	1.03769	0.147417		6.91651	6.87926	6.13284	6.37713	7.21397	7.08872	19	19	823.41
Q9UIL1-3	Isoform 3 of Short coiled-coil protein	SCOC	SCOC_HUMAN	0.0531615	1.03754	0.662512		0.108034	0.0350646	0.141654	0.120888	0.101651	0.0729011	1	1	56.38
P01024	Complement C3	C3	CO3_HUMAN	0.0524342	1.03701	0.0895837		9.98712	10.947	9.86761	10.0184	11.0294	10.894	46	40	2139.44
Q5ZPR3-3	Isoform 3 of CD276 antigen	CD276	CD276_HUMAN	0.0522551	1.03688	0.542494		0.678385	0.681193	0.813183	0.884622	0.714656	0.653625	3	3	220.72
Q14012	Calcium/calmodulin-dependent protein kinase type 1	CAMK1	KCC1A_HUMAN	0.0522487	1.03688	0.166691		0.440457	0.452129	0.455268	0.478788	0.41998	0.498794	6	6	258.23
P27797	Calreticulin	CALR	CALR_HUMAN	0.0520984	1.03677	0.526441		229.248	277.276	271.557	229.884	316.157	260.651	32	31	1449.39
O00273	DNA fragmentation factor subunit alpha	DFFA	DFFA_HUMAN	0.0518776	1.03661	0.415407		2.33733	1.96809	2.38689	2.47769	2.37415	2.0855	5	5	350.6
O43237	Cytoplasmic dynein 1 light intermediate chain 2	DYNC1LI2	DC1L2_HUMAN	0.0518753	1.03661	0.0651133		1.10512	1.07645	1.0585	1.10394	1.17015	1.0846	9	6	347.35
Q6PD62	RNA polymerase-associated protein CTR9 homolog	CTR9	CTR9_HUMAN	0.0517319	1.03651	0.468412		0.944635	1.12341	1.09213	0.912243	1.15485	1.20846	9	9	392.61
Q9UBE0	SUMO-activating enzyme subunit 1	SAE1	SAE1_HUMAN	0.0516767	1.03647	0.424081		4.7462	5.40772	5.27765	4.60542	6.02913	5.3598	12	12	459.07
Q8IZA0-3	Isoform 3 of Dyslexia-associated protein KIAA0319-like protein	KIAA0319L	K319L_HUMAN	0.0516748	1.03647	0.247669		0.216836	0.250424	0.194983	0.218411	0.229137	0.238846	4	4	171.62
Q9NZD8-2	Isoform 2 of Maspardin	SPG21	SPG21_HUMAN	0.0516189	1.03643	0.895343		0.106169	0.140827	0.165397	0.0818372	0.190394	0.155184	2	1	58.48
P33993	DNA replication licensing factor MCM7	MCM7	MCM7_HUMAN	0.0514685	1.03632	0.0806992		12.314	11.6925	10.6612	11.6275	11.9272	12.3721	30	27	1519.44
Q9UHB6	LIM domain and actin-binding protein 1	LIMA1	LIMA1_HUMAN	0.0513231	1.03621	0.241036		0.592843	0.625844	0.637875	0.662693	0.570534	0.69057	7	7	285.72
Q8NBP5	Major facilitator superfamily domain-containing protein 9	MFSD9	MFSD9_HUMAN	0.051073	1.03604	0.123388		0.0293859	0.0280903	0.0273168	0.0269771	0.0293237	0.0315478	1	1	45.11
Q13409-6	Isoform 2F of Cytoplasmic dynein 1 intermediate chain 2	DYNC1I2	DC1I2_HUMAN	0.0510667	1.03603	0.355308		2.15808	2.31096	2.12834	1.96922	2.52722	2.33865	5	5	304.47
P08758	Annexin A5	ANXA5	ANXA5_HUMAN	0.0508289	1.03586	0.0450368		107.274	112.933	114.05	117.668	113.763	114.813	33	28	1675.96
P15954	Cytochrome c oxidase subunit 7C, mitochondrial	COX7C	COX7C_HUMAN	0.0505159	1.03564	0.652614		2.91777	2.27187	3.34519	3.53045	2.89838	2.41014	2	2	39.34
Q9NVT9	Armadillo repeat-containing protein 1	ARMC1	ARMC1_HUMAN	0.0505097	1.03563	0.130259		0.703247	0.621379	0.614183	0.668876	0.675197	0.663817	3	3	146.58
Q9NP72	Ras-related protein Rab-18	RAB18	RAB18_HUMAN	0.0503487	1.03552	0.407826		6.19035	7.23625	6.81588	6.7447	6.13008	8.08662	6	6	420.02
P53634	Dipeptidyl peptidase 1	CTSC	CATC_HUMAN	0.0502622	1.03545	0.541603		0.442794	0.454392	0.446185	0.516073	0.367327	0.507598	5	5	141.44
P42126-2	Isoform 2 of Enoyl-CoA delta isomerase 1, mitochondrial	ECI1	ECI1_HUMAN	0.0499826	1.03525	0.190553		11.7801	13.8718	11.9898	12.8177	12.2354	13.9156	10	9	500.66
P31948	Stress-induced-phosphoprotein 1	STIP1	STIP1_HUMAN	0.0496533	1.03502	0.407063		48.5984	44.4089	56.569	54.2581	52.3919	48.1639	35	35	1666.4
Q86TG7	Retrotransposon-derived protein PEG10	PEG10	PEG10_HUMAN	0.0495723	1.03496	0.353446		30.3215	30.9913	29.2749	28.9631	35.6239	29.1674	23	23	1059.49
P45954	Short/branched chain specific acyl-CoA dehydrogenase, mitochondrial	ACADSB	ACDSB_HUMAN	0.0492018	1.03469	0.0419678		25.2291	24.8827	22.7202	25.6246	24.4217	25.3124	18	16	707.01
Q9H6E4	Coiled-coil domain-containing protein 134	CCDC134	CC134_HUMAN	0.0491629	1.03466	0.485219		0.8912	0.801936	0.938856	1.02784	0.905478	0.789908	3	3	131.73
Q15166	Serum paraoxonase/lactonase 3	PON3	PON3_HUMAN	0.0491058	1.03462	0.429442		0.577897	0.434859	0.437854	0.526123	0.457663	0.517049	2	2	46.23
Q14558	Phosphoribosyl pyrophosphate synthase-associated protein 1	PRPSAP1	KPRA_HUMAN	0.0487073	1.03434	0.122286		3.04984	3.35221	3.08046	3.08028	3.44739	3.28044	9	9	628.72
P53597	Succinyl-CoA ligase [ADP/GDP-forming] subunit alpha, mitochondrial	SUCLG1	SUCA_HUMAN	0.0482953	1.03404	0.0863151		7.26855	7.25331	6.34597	7.26885	7.01595	7.29342	8	8	427.69
Q9NX40	OCIA domain-containing protein 1	OCIAD1	OCAD1_HUMAN	0.048056	1.03387	0.651447		3.44456	3.23687	4.14394	4.02016	4.24148	2.9304	8	8	398.52
Q6UXN9	WD repeat-containing protein 82	WDR82	WDR82_HUMAN	0.0477828	1.03368	0.262875		1.03956	1.01566	0.900627	0.917112	1.08582	1.05247	9	5	370.03
P17096-2	Isoform HMG-Y of High mobility group protein HMG-I/HMG-Y	HMGA1	HMGA1_HUMAN	0.0476329	1.03357	0.717786		2.27616	1.98724	2.71121	2.50706	2.89591	1.80576	4	2	136.41
O60664-4	Isoform 4 of Perilipin-3	PLIN3	PLIN3_HUMAN	0.0475343	1.0335	0.274288		15.0427	15.5605	17.5782	17.5128	16.0068	16.2757	18	17	1050.09
Q12800-2	Isoform 2 of Alpha-globin transcription factor CP2	TFCP2	TFCP2_HUMAN	0.0471926	1.03325	0.39056		0.189422	0.241621	0.207143	0.221717	0.195914	0.241776	3	3	106.19
O43598	2'-deoxynucleoside 5'-phosphate N-hydrolase 1	DNPH1	DNPH1_HUMAN	0.0470094	1.03312	0.411531		1.47552	1.53694	1.83127	1.80897	1.6264	1.56879	4	4	229.24
Q5T4S7-3;Q8TEU7-5	Isoform 3 of E3 ubiquitin-protein ligase UBR4	UBR4	UBR4_HUMAN	0.0468737	1.03302	0.109901		10.8453	11.302	10.2962	10.3128	11.4763	11.7258	70	67	2771.09
Q969N2-5	Isoform 5 of GPI transamidase component PIG-T	PIGT	PIGT_HUMAN	0.04672	1.03291	0.208816		0.243816	0.241357	0.203515	0.223451	0.241084	0.24682	4	4	162.27
Q14160	Protein scribble homolog	SCRIB	SCRIB_HUMAN	0.0466173	1.03284	0.517003		0.173985	0.161285	0.156699	0.185715	0.181756	0.140654	3	2	114.86
Q9Y394	Dehydrogenase/reductase SDR family member 7	DHRS7	DHRS7_HUMAN	0.0465034	1.03276	0.580329		0.642651	0.732892	0.730012	0.694981	0.59684	0.88271	6	6	264.82
O14561	Acyl carrier protein, mitochondrial	NDUFAB1	ACPM_HUMAN	0.0464599	1.03273	0.566602		8.04903	9.49726	12.8316	10.4699	11.2857	9.61646	4	4	227.24
O43809	Cleavage and polyadenylation specificity factor subunit 5	NUDT21	CPSF5_HUMAN	0.0464425	1.03272	0.442183		3.43553	3.16981	3.42726	3.69392	3.68811	2.97879	7	6	358.65
Q9H845	Acyl-CoA dehydrogenase family member 9, mitochondrial	ACAD9	ACAD9_HUMAN	0.046381	1.03267	0.140546		2.14956	2.16944	2.03019	2.1399	2.01915	2.39757	12	11	619.61
P62136	Serine/threonine-protein phosphatase PP1-alpha catalytic subunit	PPP1CA	PP1A_HUMAN	0.0461915	1.03254	0.295244		0.700007	0.652123	0.553796	0.635889	0.622141	0.709906	14	2	732.73
P40926	Malate dehydrogenase, mitochondrial	MDH2	MDHM_HUMAN	0.046087	1.03246	0.0993455		140.809	145.675	126.163	138.009	145.798	142.234	19	19	1263.66
Q15813	Tubulin-specific chaperone E	TBCE	TBCE_HUMAN	0.0460422	1.03243	0.112755		1.1272	1.25504	1.14836	1.2297	1.13498	1.28042	8	7	362.55
P06744	Glucose-6-phosphate isomerase	GPI	G6PI_HUMAN	0.0457199	1.0322	0.215022		20.9677	23.7056	21.0026	20.5916	22.8937	24.3052	24	15	1141.41
P23368	NAD-dependent malic enzyme, mitochondrial	ME2	MAOM_HUMAN	0.0456926	1.03218	0.304464		1.0431	1.02355	0.931314	1.09904	0.903711	1.09169	6	6	305.41
Q9UHR5-2	Isoform 2 of SAP30-binding protein	SAP30BP	S30BP_HUMAN	0.045678	1.03217	0.329134		1.11837	1.18543	1.255	1.35464	1.15801	1.16063	5	5	244.62
Q13217	DnaJ homolog subfamily C member 3	DNAJC3	DNJC3_HUMAN	0.0456464	1.03215	0.311175		8.80824	7.94998	7.53162	8.70033	8.73884	7.63148	15	15	577.24
O43865	Putative adenosylhomocysteinase 2	AHCYL1	SAHH2_HUMAN	0.0452987	1.0319	0.130112		1.713	1.64445	1.50101	1.59475	1.62315	1.79553	6	4	288.08
Q07157	Tight junction protein ZO-1	TJP1	ZO1_HUMAN	0.0449348	1.03164	0.646844		1.12587	0.989649	1.09262	1.01553	1.36807	0.926032	12	11	517.05
Q9NRL2-2	Isoform 2 of Bromodomain adjacent to zinc finger domain protein 1A	BAZ1A	BAZ1A_HUMAN	0.0449344	1.03164	0.148985		0.1594	0.163436	0.159399	0.164002	0.152017	0.181472	1	1	39.14
Q08623-3	Isoform 3 of Pseudouridine-5'-monophosphatase	HDHD1	HDHD1_HUMAN	0.0449142	1.03162	0.503307		0.649582	0.649447	0.753811	0.778073	0.591788	0.747893	3	3	133.21
Q9NZ45	CDGSH iron-sulfur domain-containing protein 1	CISD1	CISD1_HUMAN	0.0448689	1.03159	0.173249		6.80208	7.22466	6.24427	7.0125	7.26803	6.63082	9	9	429.13
Q9NY27	Serine/threonine-protein phosphatase 4 regulatory subunit 2	PPP4R2	PP4R2_HUMAN	0.0448395	1.03157	0.531565		0.510439	0.463368	0.50278	0.511005	0.582875	0.42932	4	4	177.7
P31040	Succinate dehydrogenase [ubiquinone] flavoprotein subunit, mitochondrial	SDHA	SDHA_HUMAN	0.0441527	1.03108	0.138134		41.1437	43.0377	39.21	39.3817	44.8726	42.9719	35	34	1817.43
Q15836;P63027	Vesicle-associated membrane protein 3	VAMP3	VAMP3_HUMAN	0.0440512	1.031	0.506453		18.9736	17.6149	20.2159	20.8169	21.1413	16.6075	4	4	294.23
Q9BWH2	FUN14 domain-containing protein 2	FUNDC2	FUND2_HUMAN	0.0438793	1.03088	0.364459		0.133027	0.133576	0.111706	0.142912	0.116575	0.130505	2	2	88.87
O15355	Protein phosphatase 1G	PPM1G	PPM1G_HUMAN	0.0438551	1.03086	0.198299		11.4195	10.9862	11.7754	11.7664	12.3574	11.1123	16	16	711.83
Q96KR1	Zinc finger RNA-binding protein	ZFR	ZFR_HUMAN	0.0432817	1.03046	0.226499		1.99894	1.94005	1.70767	2.07064	1.87127	1.87671	8	8	341.92
P80303	Nucleobindin-2	NUCB2	NUCB2_HUMAN	0.0431033	1.03033	0.625824		12.5337	12.9337	16.9803	14.8911	16.7291	12.1149	19	17	910.08
Q7Z3K3-5	Isoform 5 of Pogo transposable element with ZNF domain	POGZ	POGZ_HUMAN	0.0429673	1.03023	0.598978		0.0345256	0.0339235	0.0224568	0.0312811	0.026349	0.036024	1	1	30.1
P47985	Cytochrome b-c1 complex subunit Rieske, mitochondrial	UQCRFS1	UCRI_HUMAN	0.0429425	1.03021	0.608762		9.44369	10.3431	10.5691	9.17149	12.7762	9.32533	10	10	447.32
Q96I99	Succinyl-CoA ligase [GDP-forming] subunit beta, mitochondrial	SUCLG2	SUCB2_HUMAN	0.0427425	1.03007	0.0276309		10.387	10.525	9.61956	10.4868	10.0743	10.8885	9	9	450.99
P20020-6;P23634-7	Isoform K of Plasma membrane calcium-transporting ATPase 1	ATP2B1	AT2B1_HUMAN	0.0426865	1.03003	0.384656		5.32807	5.31177	4.44704	4.73522	5.76339	5.04133	16	10	691.59
Q13363-2	Isoform 2 of C-terminal-binding protein 1	CTBP1	CTBP1_HUMAN	0.0426375	1.03	0.203106		4.23125	4.28481	3.65456	4.09882	4.38394	4.05291	10	10	491.44
P09493-3	Isoform 3 of Tropomyosin alpha-1 chain	TPM1	TPM1_HUMAN	0.0424264	1.02984	0.751802		0.234219	0.202226	0.267093	0.303405	0.23986	0.18127	9	3	361.33
O75436	Vacuolar protein sorting-associated protein 26A	VPS26A	VP26A_HUMAN	0.0423738	1.02981	0.207555		4.71013	4.70792	4.03565	4.29714	4.68154	4.87604	10	9	367.92
Q9Y520-3	Isoform 3 of Protein PRRC2C	PRRC2C	PRC2C_HUMAN	0.0420683	1.02959	0.774044		1.00164	0.817828	1.14226	1.03218	1.27773	0.739444	9	9	277.19
Q5SNT6	WASH complex subunit FAM21B	FAM21B	FA21B_HUMAN	0.0420307	1.02956	0.655745		0.064418	0.0544946	0.0781011	0.082137	0.062091	0.0586097	1	1	21.32
P30084	Enoyl-CoA hydratase, mitochondrial	ECHS1	ECHM_HUMAN	0.0419708	1.02952	0.269703		62.2445	57.7227	60.3912	57.3916	67.5556	60.7353	14	14	719.76
P48047	ATP synthase subunit O, mitochondrial	ATP5O	ATPO_HUMAN	0.0417516	1.02936	0.18083		37.8272	41.9382	41.8121	39.8139	43.7412	41.5922	12	12	709.16
P41567	Eukaryotic translation initiation factor 1	EIF1	EIF1_HUMAN	0.0415405	1.02921	0.519565		2.52686	2.00671	2.52062	2.70254	2.38482	2.17291	5	5	258.33
Q16877;Q16875-3	6-phosphofructo-2-kinase/fructose-2,6-bisphosphatase 4	PFKFB4	F264_HUMAN	0.0413283	1.02906	0.271108		0.510092	0.444079	0.405093	0.470304	0.450432	0.478029	7	6	269.38
Q9Y4Z0	U6 snRNA-associated Sm-like protein LSm4	LSM4	LSM4_HUMAN	0.0412014	1.02897	0.492716		0.708908	0.683205	0.852239	0.843822	0.773794	0.691756	4	3	130.57
O00139-2	Isoform 2 of Kinesin-like protein KIF2A	KIF2A	KIF2A_HUMAN	0.0411447	1.02893	0.359617		0.496607	0.44638	0.426563	0.522758	0.434134	0.452279	5	4	187.73
Q9NQP4	Prefoldin subunit 4	PFDN4	PFD4_HUMAN	0.0411404	1.02893	0.752341		2.80928	2.28219	3.25314	3.35037	3.14758	2.08805	4	4	331.75
Q9H3P7	Golgi resident protein GCP60	ACBD3	GCP60_HUMAN	0.0409542	1.02879	0.288157		2.47015	2.26623	2.06766	2.12785	2.45946	2.41264	8	8	394.62
P00387-2	Isoform 2 of NADH-cytochrome b5 reductase 3	CYB5R3	NB5R3_HUMAN	0.0407537	1.02865	0.451618		42.6782	49.7439	45.9228	40.864	47.0584	54.3862	16	16	874.51
O60762	Dolichol-phosphate mannosyltransferase subunit 1	DPM1	DPM1_HUMAN	0.0405851	1.02853	0.175072		4.94073	4.77704	4.48659	4.94903	4.44323	5.21737	8	7	380.44
O60333-2	Isoform 2 of Kinesin-like protein KIF1B	KIF1B	KIF1B_HUMAN	0.0402799	1.02831	0.727361		0.0550831	0.0831157	0.144876	0.125722	0.0693297	0.0960382	2	2	53.39
P07900	Heat shock protein HSP 90-alpha	HSP90AA1	HS90A_HUMAN	0.0401568	1.02823	0.103013		117.219	106.42	102.689	111.475	110.454	113.61	62	35	3165.88
P14174	Macrophage migration inhibitory factor	MIF	MIF_HUMAN	0.0400615	1.02816	0.671302		4.8172	4.42772	7.00322	5.6412	4.48427	6.58018	2	1	138.43
Q00765	Receptor expression-enhancing protein 5	REEP5	REEP5_HUMAN	0.0400285	1.02813	0.266444		2.70722	2.7547	2.6576	2.89822	2.45318	2.99656	4	4	159.45
Q9NVH6-7	Isoform 7 of Trimethyllysine dioxygenase, mitochondrial	TMLHE	TMLH_HUMAN	0.0399234	1.02806	0.731864		0.0462037	0.0685404	0.0578659	0.0522241	0.0477967	0.0774326	2	2	62.88
Q13131	5'-AMP-activated protein kinase catalytic subunit alpha-1	PRKAA1	AAPK1_HUMAN	0.0398986	1.02804	0.348737		2.13933	2.30051	1.94468	2.04896	2.02375	2.49085	10	10	391.84
Q7Z7H5-3	Isoform 3 of Transmembrane emp24 domain-containing protein 4	TMED4	TMED4_HUMAN	0.0398497	1.02801	0.247739		4.26894	4.50146	4.12236	4.80059	4.0056	4.44766	10	6	338.91
P25205	DNA replication licensing factor MCM3	MCM3	MCM3_HUMAN	0.0397819	1.02796	0.106156		17.3171	15.6542	15.7067	16.0549	16.6675	17.3166	26	26	1319.16
Q9NZJ9	Diphosphoinositol polyphosphate phosphohydrolase 2	NUDT4	NUDT4_HUMAN	0.0397661	1.02795	0.344688		0.353422	0.393279	0.353411	0.400789	0.391688	0.338379	2	2	96.87
Q14847	LIM and SH3 domain protein 1	LASP1	LASP1_HUMAN	0.0397451	1.02793	0.57026		8.50496	7.10939	8.28827	9.28415	8.37325	6.91288	11	11	486.19
Q9Y4C1	Lysine-specific demethylase 3A	KDM3A	KDM3A_HUMAN	0.0396783	1.02788	0.722674		0.0598831	0.0603164	0.0747084	0.06431	0.0515151	0.0845177	2	2	72.21
Q12929	Epidermal growth factor receptor kinase substrate 8	EPS8	EPS8_HUMAN	0.0393488	1.02765	0.179236		0.221796	0.218512	0.216301	0.225342	0.23835	0.211073	2	2	83.59
Q92614-3	Isoform 3 of Unconventional myosin-XVIIIa	MYO18A	MY18A_HUMAN	0.0390926	1.02747	0.669109		0.356504	0.286726	0.336668	0.320179	0.409866	0.276768	5	5	219.5
Q9ULT0-3	Isoform 2 of Tetratricopeptide repeat protein 7A	TTC7A	TTC7A_HUMAN	0.0387672	1.02724	0.33346		0.121095	0.14434	0.12219	0.125357	0.124816	0.14801	1	1	27.52
Q86SX6	Glutaredoxin-related protein 5, mitochondrial	GLRX5	GLRX5_HUMAN	0.0387505	1.02722	0.590766		3.15752	3.51416	4.49485	4.31642	3.77749	3.37661	4	4	209.03
Q9NRR3	CDC42 small effector protein 2	CDC42SE2	C42S2_HUMAN	0.0386351	1.02714	0.512576		0.461127	0.52395	0.637877	0.549898	0.505955	0.611152	1	1	39.79
Q9UKF6	Cleavage and polyadenylation specificity factor subunit 3	CPSF3	CPSF3_HUMAN	0.0385339	1.02707	0.257254		0.993212	0.947283	0.832334	0.90451	1.00847	0.934904	7	7	315.29
P35222	Catenin beta-1	CTNNB1	CTNB1_HUMAN	0.0384695	1.02702	0.0804836		8.57946	8.42925	7.69707	8.06601	8.42057	8.88684	24	19	1282.37
Q9BVI4	Nucleolar complex protein 4 homolog	NOC4L	NOC4L_HUMAN	0.0383305	1.02692	0.382943		2.43082	2.63046	2.47332	2.29589	2.89501	2.54657	7	7	374.11
P21964-2	Isoform Soluble of Catechol O-methyltransferase	COMT	COMT_HUMAN	0.0382766	1.02689	0.219795		26.1951	25.9527	26.3145	24.9334	29.0842	26.5542	16	16	841.47
P56937-3	Isoform 3 of 3-keto-steroid reductase	HSD17B7	DHB7_HUMAN	0.0380243	1.02671	0.182392		0.64575	0.721384	0.621724	0.643086	0.711757	0.687131	3	3	86.48
Q9BUB7	Transmembrane protein 70, mitochondrial	TMEM70	TMM70_HUMAN	0.037939	1.02665	0.00220935	√	1.18181	1.18169	1.16146	1.21143	1.17232	1.23513	5	4	217.83
Q9BRT2	Ubiquinol-cytochrome-c reductase complex assembly factor 2	UQCC2	UQCC2_HUMAN	0.0377422	1.02651	0.66381		2.17882	1.76773	2.57133	2.48367	2.39651	1.81047	5	5	238.18
Q8IWE2	Protein NOXP20	FAM114A1	NXP20_HUMAN	0.0377419	1.02651	0.16283		0.0513902	0.0500682	0.0474684	0.0511453	0.0467259	0.055003	1	1	56.26
P16435	NADPH--cytochrome P450 reductase	POR	NCPR_HUMAN	0.0376931	1.02647	0.10684		45.9583	48.0631	44.2756	46.7662	44.2047	50.9869	38	37	1921.53
Q9Y6B6	GTP-binding protein SAR1b	SAR1B	SAR1B_HUMAN	0.0376864	1.02647	0.0859324		2.53132	2.55026	2.46341	2.6082	2.39455	2.74192	11	6	398.96
P27487	Dipeptidyl peptidase 4	DPP4	DPP4_HUMAN	0.0374969	1.02633	0.167435		19.8043	20.7563	18.4909	20.2413	18.6148	21.7504	27	26	1297.94
Q9NQG5	Regulation of nuclear pre-mRNA domain-containing protein 1B	RPRD1B	RPR1B_HUMAN	0.0372417	1.02615	0.244661		6.38001	6.11775	6.6648	6.964	6.4691	6.23056	9	7	494.07
Q9Y6A4	UPF0468 protein C16orf80	C16orf80	CP080_HUMAN	0.0371127	1.02606	0.594947		0.657092	0.705113	0.759161	0.668777	0.622205	0.885663	4	4	207.51
Q9BYJ9	YTH domain-containing family protein 1	YTHDF1	YTHD1_HUMAN	0.0370319	1.026	0.898033		0.281602	0.317686	0.368314	0.222238	0.4686	0.301922	5	3	195.97
P61970	Nuclear transport factor 2	NUTF2	NTF2_HUMAN	0.0369086	1.02591	0.700067		0.901873	1.27608	1.49104	1.02566	1.53504	1.20338	2	2	55.98
Q8N7H5	RNA polymerase II-associated factor 1 homolog	PAF1	PAF1_HUMAN	0.0368761	1.02589	0.147452		1.06334	1.14208	1.01172	1.03436	1.15309	1.11298	7	7	399.87
P06400	Retinoblastoma-associated protein	RB1	RB_HUMAN	0.0365786	1.02568	0.349346		0.0720302	0.0938952	0.077269	0.0821483	0.0806841	0.0866069	2	2	99.17
Q6L8Q7-2	Isoform 2 of 2',5'-phosphodiesterase 12	PDE12	PDE12_HUMAN	0.0364897	1.02562	0.0832697		0.447948	0.467461	0.410658	0.44985	0.435095	0.475089	4	4	170.22
Q8N6S5	ADP-ribosylation factor-like protein 6-interacting protein 6	ARL6IP6	AR6P6_HUMAN	0.0361516	1.02537	0.46156		0.475518	0.370616	0.330147	0.405392	0.3991	0.401637	1	1	50.16
P48147	Prolyl endopeptidase	PREP	PPCE_HUMAN	0.0360319	1.02529	0.12796		2.96758	3.26644	3.00779	2.96315	3.14517	3.36721	11	10	418.63
O00165-5	Isoform 5 of HCLS1-associated protein X-1	HAX1	HAX1_HUMAN	0.0359356	1.02522	0.88231		0.243786	0.264046	0.316606	0.224778	0.404029	0.216423	3	3	89.53
O15173	Membrane-associated progesterone receptor component 2	PGRMC2	PGRC2_HUMAN	0.035812	1.02513	0.260304		9.72011	9.7029	10.0095	10.5594	10.3428	9.27008	8	7	380.15
Q9NRP0	Oligosaccharyltransferase complex subunit OSTC	OSTC	OSTC_HUMAN	0.0354692	1.02489	0.374545		4.09074	4.18361	3.81103	3.74456	3.88179	4.75984	1	1	58.19
O60783	28S ribosomal protein S14, mitochondrial	MRPS14	RT14_HUMAN	0.0353571	1.02481	0.320046		0.842627	0.867861	0.895409	0.908544	0.949884	0.812122	2	2	200.46
Q9BRG1	Vacuolar protein-sorting-associated protein 25	VPS25	VPS25_HUMAN	0.0353345	1.02479	0.699631		0.43888	0.474009	0.57014	0.611149	0.396511	0.51214	5	5	241.15
P55212	Caspase-6	CASP6	CASP6_HUMAN	0.0351898	1.02469	0.50447		0.143539	0.132835	0.106985	0.114508	0.142636	0.135681	2	1	90.48
P22307-8	Isoform 8 of Non-specific lipid-transfer protein	SCP2	NLTP_HUMAN	0.035136	1.02465	0.376866		6.71965	6.4225	7.6178	7.59314	6.63107	7.04755	12	12	638.27
Q07866-8	Isoform S of Kinesin light chain 1	KLC1	KLC1_HUMAN	0.0347663	1.02439	0.472014		1.94918	2.17529	2.2885	2.29554	1.8798	2.39404	17	8	829.76
P56134-4	Isoform 4 of ATP synthase subunit f, mitochondrial	ATP5J2	ATPK_HUMAN	0.0346443	1.0243	0.244241		5.96361	6.77682	6.37077	6.01518	6.49501	7.06549	5	3	253.01
P38435	Vitamin K-dependent gamma-carboxylase	GGCX	VKGC_HUMAN	0.0343188	1.02407	0.0117165		2.03808	2.00235	2.00337	2.08869	2.03614	2.06447	7	7	296.13
O43660	Pleiotropic regulator 1	PLRG1	PLRG1_HUMAN	0.0339629	1.02382	0.391974		1.56146	1.68096	1.56415	1.42152	1.77977	1.71977	10	10	374.41
P07919	Cytochrome b-c1 complex subunit 6, mitochondrial	UQCRH	QCR6_HUMAN	0.0339272	1.0238	0.721236		8.66683	8.21499	11.9838	11.4009	10.5376	7.61391	3	3	158.5
P13861	cAMP-dependent protein kinase type II-alpha regulatory subunit	PRKAR2A	KAP2_HUMAN	0.0336425	1.02359	0.153469		6.58952	7.01725	6.65165	7.10839	7.09001	6.53798	12	12	682.12
Q9UHD1	Cysteine and histidine-rich domain-containing protein 1	CHORDC1	CHRD1_HUMAN	0.0336356	1.02359	0.412918		1.54563	1.41303	1.45772	1.31037	1.64108	1.56909	7	6	269.26
Q7Z2K6	Endoplasmic reticulum metallopeptidase 1	ERMP1	ERMP1_HUMAN	0.0330274	1.02316	0.0759693		2.15474	2.30728	2.23325	2.26708	2.16782	2.41541	10	10	479.35
P16662	UDP-glucuronosyltransferase 2B7	UGT2B7	UD2B7_HUMAN	0.0329381	1.02309	0.138386		0.598249	0.5878	0.520418	0.585141	0.555646	0.605088	5	3	238.39
P52292	Importin subunit alpha-1	KPNA2	IMA1_HUMAN	0.032602	1.02286	0.25295		11.0099	9.81434	10.5113	10.2704	10.1429	11.6384	14	14	752.82
O60488-2	Isoform Short of Long-chain-fatty-acid--CoA ligase 4	ACSL4	ACSL4_HUMAN	0.0321009	1.0225	0.100434		32.4104	32.7278	31.5696	30.8808	32.4979	35.5049	40	35	2209.87
P17152	Transmembrane protein 11, mitochondrial	TMEM11	TMM11_HUMAN	0.0318697	1.02234	0.248068		0.62335	0.627212	0.535623	0.586762	0.641833	0.597486	2	2	53.92
P49736	DNA replication licensing factor MCM2	MCM2	MCM2_HUMAN	0.0317893	1.02228	0.0310715		6.66101	6.55979	6.28334	6.40771	6.51701	7.01396	21	21	956.68
Q96IJ6	Mannose-1-phosphate guanyltransferase alpha	GMPPA	GMPPA_HUMAN	0.031758	1.02226	0.232268		2.57973	2.77136	2.41112	2.46195	2.57959	2.89344	6	6	293.02
P35613-2;P35613-3	Isoform 2 of Basigin	BSG	BASI_HUMAN	0.0317573	1.02226	0.501711		47.1773	54.305	61.5287	51.9245	60.9508	53.7636	13	13	882.36
O75323	Protein NipSnap homolog 2	GBAS	NIPS2_HUMAN	0.0316623	1.02219	0.283331		1.99416	2.21266	1.85769	2.15972	1.88874	2.1506	5	5	214.15
O15258	Protein RER1	RER1	RER1_HUMAN	0.0316545	1.02218	0.175558		5.15821	5.29669	4.79717	4.80175	5.44409	5.34456	5	5	179.42
P16930	Fumarylacetoacetase	FAH	FAAA_HUMAN	0.0315091	1.02208	0.257191		5.83499	5.66824	4.81606	5.43974	5.73193	5.50796	10	10	542.72
Q96HW7	Integrator complex subunit 4	INTS4	INT4_HUMAN	0.0314623	1.02205	0.972154		0.027171	0.0360501	0.0394147	0.0209323	0.0525103	0.0314561	1	1	73.36
P10599	Thioredoxin	TXN	THIO_HUMAN	0.0310761	1.02177	0.643908		26.3826	22.2197	29.0863	31.3395	25.0789	22.9619	7	7	343.65
O75190	DnaJ homolog subfamily B member 6	DNAJB6	DNJB6_HUMAN	0.0308899	1.02164	0.293891		0.331464	0.335642	0.314964	0.36804	0.307473	0.327811	2	2	103.27
P83876	Thioredoxin-like protein 4A	TXNL4A	TXN4A_HUMAN	0.0307514	1.02154	0.713594		0.172939	0.236941	0.215531	0.204009	0.169224	0.265652	2	2	79.69
O75569	Interferon-inducible double-stranded RNA-dependent protein kinase activator A	PRKRA	PRKRA_HUMAN	0.0307136	1.02152	0.169123		6.58254	6.67291	5.86297	6.81567	6.31768	6.39645	11	11	567.08
P43034	Platelet-activating factor acetylhydrolase IB subunit alpha	PAFAH1B1	LIS1_HUMAN	0.0305418	1.0214	0.390236		0.704882	0.832847	0.670401	0.697738	0.721519	0.836117	7	4	270.56
O75874	Isocitrate dehydrogenase [NADP] cytoplasmic	IDH1	IDHC_HUMAN	0.030346	1.02126	0.342302		66.1769	76.5471	65.4377	69.6617	64.5767	78.3481	28	25	1422.99
Q15833-2	Isoform 2 of Syntaxin-binding protein 2	STXBP2	STXB2_HUMAN	0.0302714	1.0212	0.624615		0.130208	0.184856	0.157274	0.132697	0.177951	0.171705	3	3	100.72
P50995-2	Isoform 2 of Annexin A11	ANXA11	ANX11_HUMAN	0.0301859	1.02114	0.141611		8.51994	7.91305	7.94352	8.68563	8.04682	8.15946	15	15	806.95
Q6P1Q0-4	Isoform 4 of LETM1 domain-containing protein 1	LETMD1	LTMD1_HUMAN	0.0300935	1.02108	0.282226		0.117003	0.11171	0.102389	0.121928	0.107524	0.108629	1	1	28.65
P08397-2	Isoform 2 of Porphobilinogen deaminase	HMBS	HEM3_HUMAN	0.0295271	1.02068	0.388985		0.174421	0.185631	0.144057	0.17732	0.174923	0.162289	4	3	152.36
Q02978	Mitochondrial 2-oxoglutarate/malate carrier protein	SLC25A11	M2OM_HUMAN	0.0295117	1.02067	0.323655		7.28816	8.18844	7.49511	7.00666	7.8999	8.53989	13	13	694.77
Q9UMS4;Q8TEB1-2;Q9BVA0	Pre-mRNA-processing factor 19	PRPF19	PRP19_HUMAN	0.0295105	1.02067	0.460387		13.3441	14.1204	12.586	11.9346	15.3891	13.5544	19	15	761.33
P62140	Serine/threonine-protein phosphatase PP1-beta catalytic subunit	PPP1CB	PP1B_HUMAN	0.0293887	1.02058	0.268594		1.48486	1.73763	1.4858	1.6219	1.48926	1.69401	13	2	698.07
P49902	Cytosolic purine 5'-nucleotidase	NT5C2	5NTC_HUMAN	0.0292335	1.02047	0.491338		1.10302	1.13323	1.11234	0.994901	1.30581	1.11643	6	6	246.42
Q5T8D3-2	Isoform 2 of Acyl-CoA-binding domain-containing protein 5	ACBD5	ACBD5_HUMAN	0.0291311	1.0204	0.600356		0.0261544	0.0259351	0.0186937	0.0278509	0.0224136	0.0219624	1	1	16.31
P0C0L5	Complement C4-B	C4B	CO4B_HUMAN	0.0291301	1.0204	0.220837		9.41094	10.7998	9.79849	9.53386	10.2361	10.8514	33	31	1687.4
Q53H12	Acylglycerol kinase, mitochondrial	AGK	AGK_HUMAN	0.0289618	1.02028	0.620809		1.37823	1.73862	1.41242	1.40562	1.34124	1.87425	6	6	277.38
P57772	Selenocysteine-specific elongation factor	EEFSEC	SELB_HUMAN	0.0287169	1.0201	0.712484		0.589665	0.685786	0.57295	0.510167	0.784649	0.590745	8	8	273.45
Q86TM6-3	Isoform 3 of E3 ubiquitin-protein ligase synoviolin	SYVN1	SYVN1_HUMAN	0.0286993	1.02009	0.25393		2.57299	2.51241	2.23106	2.63377	2.44942	2.38028	6	6	267.72
P51665	26S proteasome non-ATPase regulatory subunit 7	PSMD7	PSMD7_HUMAN	0.0285203	1.01997	0.445069		8.81746	8.57772	8.92827	8.75602	10.0238	8.06915	11	11	660.19
Q9UDY4	DnaJ homolog subfamily B member 4	DNAJB4	DNJB4_HUMAN	0.0281885	1.01973	0.700394		0.0316734	0.0220068	0.0224438	0.0319211	0.0220705	0.0236344	2	1	87.14
P11117	Lysosomal acid phosphatase	ACP2	PPAL_HUMAN	0.0276491	1.01935	0.504867		0.393565	0.353234	0.351326	0.426777	0.328827	0.363769	3	3	120.89
Q9HD34	LYR motif-containing protein 4	LYRM4	LYRM4_HUMAN	0.0276096	1.01932	0.479074		1.19994	1.09225	1.28444	1.32522	1.21983	1.10069	3	2	211.58
Q9P2W1-2	Isoform 2 of Homologous-pairing protein 2 homolog	PSMC3IP	HOP2_HUMAN	0.0272829	1.01909	0.572477		0.109823	0.137602	0.139482	0.14461	0.134411	0.115273	1	1	21.28
Q96ER3	Protein SAAL1	SAAL1	SAAL1_HUMAN	0.0271633	1.01901	0.608902		0.049508	0.0394466	0.0410552	0.0464707	0.0363432	0.049667	1	1	41.05
P04844	Dolichyl-diphosphooligosaccharide--protein glycosyltransferase subunit 2	RPN2	RPN2_HUMAN	0.0262105	1.01833	0.514927		58.4339	57.3993	54.4045	51.1131	66.8029	55.4428	23	22	1338.56
Q01650	Large neutral amino acids transporter small subunit 1	SLC7A5	LAT1_HUMAN	0.0261954	1.01832	0.485816		6.232	5.56947	5.03935	5.44036	6.40124	5.3078	4	4	277.78
P33991	DNA replication licensing factor MCM4	MCM4	MCM4_HUMAN	0.0259608	1.01816	0.148269		14.6986	14.9184	14.1749	13.7004	15.1804	15.7063	27	27	1537.81
Q9NX63	Coiled-coil-helix-coiled-coil-helix domain-containing protein 3, mitochondrial	CHCHD3	CHCH3_HUMAN	0.0259321	1.01814	0.373352		6.71967	6.17513	6.51715	7.22462	6.39337	6.14604	11	10	658.8
O95777	U6 snRNA-associated Sm-like protein LSm8	LSM8	LSM8_HUMAN	0.025811	1.01805	0.226652		0.358031	0.364199	0.32619	0.376587	0.32848	0.362279	2	2	81.74
P63167	Dynein light chain 1, cytoplasmic	DYNLL1	DYL1_HUMAN	0.025317	1.0177	0.434679		3.65582	4.00238	3.72715	3.37744	4.24765	3.96182	4	4	199.28
Q8WVM8	Sec1 family domain-containing protein 1	SCFD1	SCFD1_HUMAN	0.0252773	1.01768	0.182292		1.99023	2.16562	1.99549	1.93231	2.10579	2.22197	11	11	498.31
Q96HD1	Cysteine-rich with EGF-like domain protein 1	CRELD1	CREL1_HUMAN	0.0252159	1.01763	0.542844		2.20814	2.67706	3.17728	2.61021	2.79408	2.80034	6	6	305.23
Q5JTV8	Torsin-1A-interacting protein 1	TOR1AIP1	TOIP1_HUMAN	0.0252029	1.01762	0.724276		1.18929	1.36489	1.51899	1.18619	1.7259	1.23286	7	5	335.54
P21953	2-oxoisovalerate dehydrogenase subunit beta, mitochondrial	BCKDHB	ODBB_HUMAN	0.0251168	1.01756	0.591166		0.443568	0.57358	0.471445	0.491946	0.432593	0.590198	2	2	73.33
P13804-2	Isoform 2 of Electron transfer flavoprotein subunit alpha, mitochondrial	ETFA	ETFA_HUMAN	0.0250225	1.0175	0.0866582		25.1467	23.4593	22.9672	23.5517	24.6434	24.6303	13	13	636.48
Q8IZV5	Retinol dehydrogenase 10	RDH10	RDH10_HUMAN	0.0248949	1.01741	0.332703		0.73425	0.624768	0.601743	0.683447	0.658616	0.652826	4	4	149.55
Q6PGP7	Tetratricopeptide repeat protein 37	TTC37	TTC37_HUMAN	0.0248668	1.01739	0.258176		0.89428	1.00483	0.916788	0.884396	1.00911	0.971346	9	9	400.72
Q15042-4	Isoform 3 of Rab3 GTPase-activating protein catalytic subunit	RAB3GAP1	RB3GP_HUMAN	0.0247669	1.01732	0.659547		0.220209	0.242865	0.234901	0.189707	0.275712	0.244641	5	5	199.8
P02545	Prelamin-A/C	LMNA	LMNA_HUMAN	0.0247067	1.01727	0.262348		6.44935	5.8492	5.53139	6.16951	6.17158	5.79682	37	3	2253.96
P62937	Peptidyl-prolyl cis-trans isomerase A	PPIA	PPIA_HUMAN	0.0244138	1.01707	0.490367		102.826	90.2782	106.654	112.749	96.9053	95.2192	17	16	925.67
Q9BV81	ER membrane protein complex subunit 6	EMC6	EMC6_HUMAN	0.0243811	1.01704	0.864825		0.164999	0.171625	0.144344	0.205199	0.109947	0.174019	1	1	23.92
O95298	NADH dehydrogenase [ubiquinone] 1 subunit C2	NDUFC2	NDUC2_HUMAN	0.0242584	1.01696	0.307617		1.91959	1.81594	1.72334	1.99715	1.69239	1.8619	5	5	222.53
O95178	NADH dehydrogenase [ubiquinone] 1 beta subcomplex subunit 2, mitochondrial	NDUFB2	NDUB2_HUMAN	0.0242001	1.01692	0.741864		0.797769	0.745553	1.03341	1.0699	0.846082	0.704332	1	1	38.01
P49257	Protein ERGIC-53	LMAN1	LMAN1_HUMAN	0.0238815	1.01669	0.55731		44.0494	49.7479	43.3168	40.4008	53.7572	45.2447	20	19	898.07
P07199	Major centromere autoantigen B	CENPB	CENPB_HUMAN	0.0237552	1.0166	0.386324		0.257789	0.252446	0.215531	0.257402	0.221113	0.2593	3	3	109.27
Q70UQ0	Inhibitor of nuclear factor kappa-B kinase-interacting protein	IKBIP	IKIP_HUMAN	0.0236343	1.01652	0.0494532		4.72705	4.49692	4.44653	4.47549	4.68363	4.73718	12	11	618.68
P62820	Ras-related protein Rab-1A	RAB1A	RAB1A_HUMAN	0.0233803	1.01634	0.493148		12.5209	13.4742	13.4554	12.7443	11.8278	15.5229	14	5	715.09
P36537-2	Isoform 2 of UDP-glucuronosyltransferase 2B10	UGT2B10	UDB10_HUMAN	0.0230474	1.0161	0.406711		0.308824	0.268065	0.313348	0.289198	0.285618	0.329757	5	2	189.65
Q96AB3	Isochorismatase domain-containing protein 2, mitochondrial	ISOC2	ISOC2_HUMAN	0.0228881	1.01599	0.667676		7.52407	8.80353	8.05009	6.54091	9.29487	8.93174	7	7	281.16
P30040	Endoplasmic reticulum resident protein 29	ERP29	ERP29_HUMAN	0.0222098	1.01551	0.632242		20.3897	16.895	21.9085	23.2712	18.6614	18.1788	11	11	467.71
Q5T6V5	UPF0553 protein C9orf64	C9orf64	CI064_HUMAN	0.0219904	1.01536	0.422176		0.681304	0.755051	0.617689	0.688831	0.625698	0.771064	4	4	121.88
Q6RW13	Type-1 angiotensin II receptor-associated protein	AGTRAP	ATRAP_HUMAN	0.0218804	1.01528	0.476811		2.55837	2.60033	2.1723	2.26791	2.77475	2.40038	2	2	104.74
Q6PIJ6-3	Isoform 3 of F-box only protein 38	FBXO38	FBX38_HUMAN	0.0218741	1.01528	0.740749		0.0192163	0.017252	0.0146056	0.0208253	0.0133181	0.0177109	1	1	10.31
Q16181-2	Isoform 2 of Septin-7	SEPT7	SEPT7_HUMAN	0.0214494	1.01498	0.287655		2.31755	2.27417	2.16979	2.33594	2.05519	2.47166	7	6	383.57
Q9NR56-3	Isoform 3 of Muscleblind-like protein 1	MBNL1	MBNL1_HUMAN	0.0212959	1.01487	0.897205		0.234829	0.146556	0.17939	0.263299	0.179991	0.125823	1	1	38.18
A6NHR9	Structural maintenance of chromosomes flexible hinge domain-containing protein 1	SMCHD1	SMHD1_HUMAN	0.0212848	1.01486	0.116451		2.0215	2.08952	1.92219	1.91246	2.08152	2.12889	26	23	1212.62
P82921	28S ribosomal protein S21, mitochondrial	MRPS21	RT21_HUMAN	0.021165	1.01478	0.674253		0.740884	0.822949	0.852519	0.931799	0.651642	0.868622	2	2	130.47
Q9GZN8	UPF0687 protein C20orf27	C20orf27	CT027_HUMAN	0.021121	1.01475	0.589063		0.1576	0.217413	0.152901	0.165623	0.165847	0.204229	1	1	28.97
O43765	Small glutamine-rich tetratricopeptide repeat-containing protein alpha	SGTA	SGTA_HUMAN	0.0205528	1.01435	0.5155		3.21984	2.75543	3.13969	3.43853	2.96621	2.841	7	7	401.76
P15559-3	Isoform 3 of NAD(P)H dehydrogenase [quinone] 1	NQO1	NQO1_HUMAN	0.020548	1.01434	0.124335		29.6738	28.9663	26.2715	27.7039	29.1056	29.3201	13	12	565.19
P31937	3-hydroxyisobutyrate dehydrogenase, mitochondrial	HIBADH	3HIDH_HUMAN	0.0204863	1.0143	0.342434		8.41662	9.76609	9.84786	8.96047	9.5733	9.89768	13	12	643.26
P62070-3	Isoform 3 of Ras-related protein R-Ras2	RRAS2	RRAS2_HUMAN	0.0204358	1.01427	0.258916		0.641955	0.648752	0.662753	0.692943	0.601633	0.686752	4	4	191.49
Q9H9E3	Conserved oligomeric Golgi complex subunit 4	COG4	COG4_HUMAN	0.02014	1.01406	0.645229		0.382699	0.417198	0.404184	0.414061	0.329955	0.476992	5	5	193.88
Q86W24	NACHT, LRR and PYD domains-containing protein 14	NLRP14	NAL14_HUMAN	0.0197485	1.01378	0.388632		1.18682	1.13459	0.952525	1.11132	1.14988	1.05786	1	1	30.38
Q8WXA9-2	Isoform 2 of Splicing regulatory glutamine/lysine-rich protein 1	SREK1	SREK1_HUMAN	0.0196921	1.01374	0.46968		0.750308	0.682072	0.704088	0.811658	0.65617	0.698001	2	2	83.83
Q14566	DNA replication licensing factor MCM6	MCM6	MCM6_HUMAN	0.0196888	1.01374	0.0414092		6.71595	6.40398	6.18238	6.54186	6.40935	6.61634	22	19	1041.93
Q16698	2,4-dienoyl-CoA reductase, mitochondrial	DECR1	DECR_HUMAN	0.0194334	1.01356	0.151765		2.11342	2.24269	2.09251	2.06258	2.11893	2.35457	6	6	173.59
Q96ND0	Protein FAM210A	FAM210A	F210A_HUMAN	0.0193864	1.01353	0.369893		0.0678712	0.068515	0.055487	0.0610721	0.0652077	0.068189	1	1	41.35
Q9NQW7-3	Isoform 3 of Xaa-Pro aminopeptidase 1	XPN	XPP1_HUMAN	0.0192359	1.01342	0.306108		2.31752	2.49994	2.27628	2.24195	2.27847	2.66854	14	13	623.58
P27105	Erythrocyte band 7 integral membrane protein	STOM	STOM_HUMAN	0.0191486	1.01336	0.310699		4.53516	5.27085	4.50733	4.49304	4.94555	5.06599	7	7	304.66
P52294	Importin subunit alpha-5	KPNA1	IMA5_HUMAN	0.0188768	1.01317	0.322296		1.57572	1.58426	1.35855	1.4397	1.62139	1.51694	7	4	347.98
Q9HCU5	Prolactin regulatory element-binding protein	PREB	PREB_HUMAN	0.0188266	1.01314	0.115967		6.99868	7.31268	6.63468	6.67628	7.21708	7.32782	13	13	639.16
Q15154-2	Isoform 2 of Pericentriolar material 1 protein	PCM1	PCM1_HUMAN	0.0187333	1.01307	0.451221		1.05848	0.944826	1.01116	1.10762	0.90458	1.04166	12	10	505.15
O43681	ATPase ASNA1	ASNA1	ASNA_HUMAN	0.0185676	1.01295	0.128192		4.45846	4.5747	4.26385	4.33314	4.28801	4.84808	10	10	479.38
P04040	Catalase	CAT	CATA_HUMAN	0.0185312	1.01293	0.156765		14.6051	14.2302	13.5302	14.9544	13.4197	14.5392	23	23	1176.4
O76061	Stanniocalcin-2	STC2	STC2_HUMAN	0.0184276	1.01285	0.611589		0.0225259	0.0179907	0.0212925	0.023991	0.0186531	0.0199595	1	1	26.06
Q9Y6M9	NADH dehydrogenase [ubiquinone] 1 beta subcomplex subunit 9	NDUFB9	NDUB9_HUMAN	0.0184093	1.01284	0.495465		5.14449	6.26182	6.73278	6.35628	5.97367	6.04209	6	6	230.47
Q16401-2	Isoform 2 of 26S proteasome non-ATPase regulatory subunit 5	PSMD5	PSMD5_HUMAN	0.0184051	1.01284	0.235569		1.11809	1.16635	1.07122	1.03823	1.18441	1.17611	8	8	328.27
Q14376	UDP-glucose 4-epimerase	GALE	GALE_HUMAN	0.0179253	1.0125	0.0658591		19.1874	19.9939	18.7733	18.5523	19.8298	20.2971	12	10	722.21
Q9Y277	Voltage-dependent anion-selective channel protein 3	VDAC3	VDAC3_HUMAN	0.0179245	1.0125	0.198058		27.8461	28.7586	25.2861	26.2942	26.9789	29.6415	13	11	750.23
Q9BXJ8-2	Isoform 2 of Transmembrane protein 120A	TMEM120A	T120A_HUMAN	0.0175824	1.01226	0.552516		0.738151	0.812566	0.830709	0.811634	0.68764	0.911352	4	4	192.12
Q92900-2	Isoform 2 of Regulator of nonsense transcripts 1	UPF1	RENT1_HUMAN	0.0174154	1.01214	0.0818984		11.9045	12.0361	11.0432	11.3106	12.0744	12.0237	35	35	1841.88
Q9UDW1	Cytochrome b-c1 complex subunit 9	UQCR10	QCR9_HUMAN	0.017367	1.01211	0.0367686		0.456555	0.481806	0.454889	0.46074	0.455659	0.493724	2	1	149.43
Q6P1M0	Long-chain fatty acid transport protein 4	SLC27A4	S27A4_HUMAN	0.0170403	1.01188	0.161543		1.06323	1.06477	1.00631	1.00744	1.0158	1.14831	7	7	191.24
Q8NHZ8	Anaphase-promoting complex subunit CDC26	CDC26	CDC26_HUMAN	0.0168221	1.01173	0.968855		0.108648	0.0618129	0.135251	0.153769	0.103466	0.0520618	1	1	60.17
P62877	E3 ubiquitin-protein ligase RBX1	RBX1	RBX1_HUMAN	0.0165915	1.01157	0.788226		0.121035	0.118194	0.0967067	0.135562	0.118889	0.0853709	1	1	34.98
Q96AT9-2	Isoform 2 of Ribulose-phosphate 3-epimerase	R	RPE_HUMAN	0.01654	1.01153	0.794089		0.0557012	0.0376464	0.0808504	0.0790363	0.0486798	0.0484905	1	1	38.31
O43847	Nardilysin	NRD1	NRDC_HUMAN	0.0165232	1.01152	0.325216		0.442114	0.379709	0.365368	0.393254	0.396555	0.411056	4	4	138.06
Q9NUG6	p53 and DNA damage-regulated protein 1	PDRG1	PDRG1_HUMAN	0.0160232	1.01117	0.697579		0.0249861	0.00395638	0.0274056	0.0279282	0.011197	0.0178522	1	1	55.31
O94788-4	Isoform 4 of Retinal dehydrogenase 2	ALDH1A2	AL1A2_HUMAN	0.0158598	1.01105	0.592913		0.345268	0.332666	0.291055	0.318632	0.373746	0.287322	4	1	179.21
P82979	SAP domain-containing ribonucleoprotein	SARNP	SARNP_HUMAN	0.0157419	1.01097	0.708013		5.52073	4.91783	6.20121	6.47001	5.73608	4.61624	6	5	347.41
O95297-2	Isoform 2 of Myelin protein zero-like protein 1	MPZL1	MPZL1_HUMAN	0.0152403	1.01062	0.330605		1.3756	1.31383	1.37526	1.46478	1.25165	1.39143	5	5	280.9
Q9H920-2	Isoform 2 of RING finger protein 121	RNF121	RN121_HUMAN	0.0152311	1.01061	0.549327		0.0213345	0.0183824	0.0168634	0.0174527	0.0178918	0.0218364	1	1	37.51
Q9NRG7-3	Isoform 3 of Epimerase family protein SDR39U1	SDR39U1	D39U1_HUMAN	0.0150626	1.0105	0.815273		0.020817	0.019359	0.02141	0.00700637	0.0259105	0.0293155	1	1	59.63
Q16637-3	Isoform SMN-delta7 of Survival motor neuron protein	SMN1	SMN_HUMAN	0.0149864	1.01044	0.731503		2.05767	2.54747	3.24861	2.11306	2.78579	3.0369	2	2	44.69
P60983	Glia maturation factor beta	GMFB	GMFB_HUMAN	0.0148124	1.01032	0.49049		0.272214	0.266721	0.29123	0.31248	0.255382	0.27087	3	2	118.92
Q8N684-2	Isoform 2 of Cleavage and polyadenylation specificity factor subunit 7	CPSF7	CPSF7_HUMAN	0.0148092	1.01032	0.0510188		2.66037	2.584	2.43743	2.60712	2.56071	2.59323	8	8	281.37
O14949	Cytochrome b-c1 complex subunit 8	UQCRQ	QCR8_HUMAN	0.0145889	1.01016	0.331981		2.97918	3.03951	3.14084	3.28598	2.81099	3.15564	4	4	151.94
P82663	28S ribosomal protein S25, mitochondrial	MRPS25	RT25_HUMAN	0.0144705	1.01008	0.327882		1.93511	2.36201	2.1299	2.14801	2.15567	2.18813	3	3	104.58
O43159	Ribosomal RNA-processing protein 8	RRP8	RRP8_HUMAN	0.0142845	1.00995	0.447819		0.0897849	0.0815336	0.0799647	0.0925531	0.0832565	0.0779741	2	2	109.78
P28288	ATP-binding cassette sub-family D member 3	ABCD3	ABCD3_HUMAN	0.0140544	1.00979	0.165628		10.9956	11.6561	11.0809	10.7496	11.0615	12.2517	22	18	1061.79
P55060-3	Isoform 3 of Exportin-2	CSE1L	XPO2_HUMAN	0.0134762	1.00938	0.294702		48.0182	46.4737	41.8738	43.1492	48.385	46.1114	40	39	2060.96
O15230	Laminin subunit alpha-5	LAMA5	LAMA5_HUMAN	0.0133107	1.00927	0.461279		0.138351	0.122715	0.134341	0.135656	0.118559	0.144858	4	3	240.81
P14927	Cytochrome b-c1 complex subunit 7	UQCRB	QCR7_HUMAN	0.0131676	1.00917	0.801642		13.8869	11.7423	17.8575	16.6574	16.3434	10.8846	10	9	435.12
Q8NFF5-3	Isoform 3 of FAD synthase	FLAD1	FAD1_HUMAN	0.0129674	1.00903	0.608436		0.132955	0.16214	0.157551	0.131535	0.150782	0.174417	3	3	87.06
Q9NZL9	Methionine adenosyltransferase 2 subunit beta	MAT2B	MAT2B_HUMAN	0.0126455	1.0088	0.667791		1.39637	1.48471	1.40191	1.46412	1.17106	1.6855	8	8	322.8
P62191	26S protease regulatory subunit 4	PSMC1	PRS4_HUMAN	0.0125188	1.00872	0.0696447		20.0852	20.873	20.5748	20.2387	21.2092	20.6215	20	18	985.03
Q92506	Estradiol 17-beta-dehydrogenase 8	HSD17B8	DHB8_HUMAN	0.0125003	1.0087	0.485381		0.543451	0.646035	0.513455	0.560096	0.618767	0.538897	3	3	242.08
Q14789	Golgin subfamily B member 1	GOLGB1	GOGB1_HUMAN	0.012156	1.00846	0.488925		1.76743	1.71949	1.64842	1.77381	1.8682	1.53678	19	17	904.07
P36957	Dihydrolipoyllysine-residue succinyltransferase component of 2-oxoglutarate dehydrogenase complex, mitochondrial	DLST	ODO2_HUMAN	0.0121378	1.00845	0.21952		27.2192	28.7686	24.3094	27.022	26.2109	27.7427	12	12	647
P13995	Bifunctional methylenetetrahydrofolate dehydrogenase/cyclohydrolase, mitochondrial	MTHFD2	MTDC_HUMAN	0.0121034	1.00842	0.520001		3.47513	3.90025	3.81252	3.2972	3.75383	4.23112	8	8	324.49
Q86TI2-4	Isoform 3 of Dipeptidyl peptidase 9	DPP9	DPP9_HUMAN	0.0120107	1.00836	0.697642		0.0234414	0.0216809	0.0225706	0.0255566	0.0181267	0.0245756	1	1	29.83
Q8NF91-7	Isoform 7 of Nesprin-1	SYNE1	SYNE1_HUMAN	0.0119016	1.00828	0.651779		9.89783	8.81159	9.42009	11.1506	8.25449	8.95747	1	1	13.08
P67812	Signal peptidase complex catalytic subunit SEC11A	SEC11A	SC11A_HUMAN	0.0118849	1.00827	0.515365		3.18382	3.14051	2.77285	3.19225	2.64099	3.33919	5	5	247.22
Q5T5P2-3	Isoform 3 of Sickle tail protein homolog	KIAA1217	SKT_HUMAN	0.0118398	1.00824	0.596518		0.658999	0.605515	0.666554	0.74744	0.609147	0.590393	2	2	99.53
Q8N465	D-2-hydroxyglutarate dehydrogenase, mitochondrial	D2HGDH	D2HDH_HUMAN	0.0109409	1.00761	0.550695		0.424472	0.479501	0.408101	0.3796	0.479354	0.463109	2	2	58.6
Q9UBS4	DnaJ homolog subfamily B member 11	DNAJB11	DJB11_HUMAN	0.0108484	1.00755	0.230149		16.7511	17.8257	17.4971	17.3582	18.2919	16.8167	11	11	524.69
Q99426	Tubulin-folding cofactor B	TBCB	TBCB_HUMAN	0.0105071	1.00731	0.382863		2.74802	2.52976	2.2118	2.41496	2.58482	2.54454	5	5	236.15
Q99643-5	Isoform 5 of Succinate dehydrogenase cytochrome b560 subunit, mitochondrial	SDHC	C560_HUMAN	0.0105065	1.00731	0.461235		3.40278	3.88118	3.54377	3.37568	3.41665	4.11454	3	3	134.4
Q9BU23-3	Isoform 3 of Lipase maturation factor 2	LMF2	LMF2_HUMAN	0.0103184	1.00718	0.830952		0.8758	1.21085	1.07409	0.917093	0.861537	1.4048	5	4	131.84
Q15819	Ubiquitin-conjugating enzyme E2 variant 2	UBE2V2	UB2V2_HUMAN	0.00987627	1.00687	0.644746		0.794462	0.700675	0.991426	0.921519	0.779571	0.802554	7	1	365.89
Q6UXV4	Apolipoprotein O-like	APOOL	APOOL_HUMAN	0.00973161	1.00677	0.197332		0.898235	1.00442	0.876218	0.950598	0.916101	0.930985	5	4	236.28
P09327	Villin-1	VIL1	VILI_HUMAN	0.00934701	1.0065	0.209423		57.4288	61.0404	54.1436	55.4797	56.0576	62.1975	31	29	1736.34
P62979	Ubiquitin-40S ribosomal protein S27a	RPS27A	RS27A_HUMAN	0.00925265	1.00643	0.56911		44.7168	38.558	40.0089	40.681	46.106	37.2898	11	10	537.48
P22059	Oxysterol-binding protein 1	OSBP	OSBP1_HUMAN	0.00887787	1.00617	0.376383		1.65971	1.7394	1.42726	1.51949	1.66594	1.67073	9	9	394.92
O95801	Tetratricopeptide repeat protein 4	TTC4	TTC4_HUMAN	0.00844333	1.00587	0.670044		0.0812833	0.0993766	0.123427	0.0966102	0.113348	0.0959132	1	1	33.45
Q9H7Z6	Histone acetyltransferase KAT8	KAT8	KAT8_HUMAN	0.00843212	1.00586	0.0445848		0.104018	0.106818	0.0994007	0.101673	0.101084	0.109297	1	1	12.37
Q6P996	Pyridoxal-dependent decarboxylase domain-containing protein 1	PDXDC1	PDXD1_HUMAN	0.00829786	1.00577	0.42936		6.4972	6.47871	6.22868	5.8913	7.09937	6.3247	18	18	768.17
Q8N3R9-2	Isoform 2 of MAGUK p55 subfamily member 5	MPP5	MPP5_HUMAN	0.0081966	1.0057	0.529243		0.021284	0.0231462	0.021847	0.0241023	0.0191685	0.0233841	1	1	55.8
Q9NUB1-3	Isoform 3 of Acetyl-coenzyme A synthetase 2-like, mitochondrial	ACSS1	ACS2L_HUMAN	0.00789641	1.00549	0.704727		0.56871	0.667808	0.602029	0.494755	0.684003	0.669879	5	5	246.5
Q9Y6C9	Mitochondrial carrier homolog 2	MTCH2	MTCH2_HUMAN	0.00762361	1.0053	0.149182		18.0887	18.7532	16.9128	17.3141	18.6055	18.1198	13	13	605.8
P56385	ATP synthase subunit e, mitochondrial	ATP5I	ATP5I_HUMAN	0.00738829	1.00513	0.646939		8.12554	7.63334	9.53745	9.62993	8.06292	7.73336	5	4	251.32
Q99497	Protein DJ-1	PARK7	PARK7_HUMAN	0.00727149	1.00505	0.445176		26.5856	24.0486	26.186	27.4645	25.7414	24.0026	18	18	948.8
Q9P0L0	Vesicle-associated membrane protein-associated protein A	VAPA	VAPA_HUMAN	0.00725816	1.00504	0.497144		6.61322	7.38023	7.6527	6.83116	7.91513	7.00905	12	10	358.99
Q9Y3E5	Peptidyl-tRNA hydrolase 2, mitochondrial	PTRH2	PTH2_HUMAN	0.0072127	1.00501	0.521494		6.04968	6.22461	5.30623	5.32785	6.5429	5.79788	9	9	460.14
Q9BTV4	Transmembrane protein 43	TMEM43	TMM43_HUMAN	0.00717357	1.00498	0.623257		5.11159	5.55174	4.85065	4.40162	5.86352	5.32618	12	12	612.6
Q8N131	Porimin	TMEM123	PORIM_HUMAN	0.00705233	1.0049	0.694665		1.53366	1.34358	1.73433	1.71523	1.60335	1.31559	1	1	13.39
P14406	Cytochrome c oxidase subunit 7A2, mitochondrial	COX7A2	CX7A2_HUMAN	0.00703472	1.00489	0.680582		3.1133	2.8933	3.34754	3.69398	2.78278	2.92311	1	1	72.52
P21397	Amine oxidase [flavin-containing] A	MAOA	AOFA_HUMAN	0.00689929	1.00479	0.0160266		2.36	2.43515	2.25323	2.31501	2.34708	2.42008	13	8	521.61
Q8ND04	Protein SMG8	SMG8	SMG8_HUMAN	0.00630108	1.00438	0.734567		0.0274367	0.0289628	0.024901	0.0271618	0.0218771	0.0326174	2	1	60.55
P52907	F-actin-capping protein subunit alpha-1	CAPZA1	CAZA1_HUMAN	0.00609859	1.00424	0.239081		9.97812	9.63601	8.83491	9.92158	9.24963	9.39834	10	7	498.71
Q9BRP8-2	Isoform 2 of Partner of Y14 and mago	WIBG	WIBG_HUMAN	0.00603505	1.00419	0.831568		5.13832	4.20165	6.22971	5.61619	6.16792	3.85084	7	7	315.93
P53990-2	Isoform 2 of IST1 homolog	IST1	IST1_HUMAN	0.00547807	1.0038	0.523517		4.55796	4.42499	5.29638	4.87525	4.95481	4.5036	7	7	306.52
Q9UBT2	SUMO-activating enzyme subunit 2	UBA2	SAE2_HUMAN	0.00537876	1.00374	0.551517		5.48266	6.04764	5.21422	4.87015	6.09341	5.84351	11	11	454.28
P21796	Voltage-dependent anion-selective channel protein 1	VDAC1	VDAC1_HUMAN	0.0050063	1.00348	0.366135		165.143	169.423	152.257	149.749	174.028	164.738	19	17	1080.5
P54920;Q9H115	Alpha-soluble NSF attachment protein	NAPA	SNAA_HUMAN	0.00500044	1.00347	0.0676662		9.61154	9.89896	9.10942	9.33362	9.32576	10.0599	15	15	847.05
Q32P28	Prolyl 3-hydroxylase 1	LEPRE1	P3H1_HUMAN	0.00450438	1.00313	0.00663707	√	1.68804	1.74124	1.70436	1.70631	1.68918	1.75421	11	11	527.47
Q7Z3T8	Zinc finger FYVE domain-containing protein 16	ZFYVE16	ZFY16_HUMAN	0.00427287	1.00297	0.778809		0.0221581	0.025119	0.0311127	0.0205583	0.0273818	0.0306822	1	1	53.96
P07741	Adenine phosphoribosyltransferase	APRT	APT_HUMAN	0.00423334	1.00294	0.210356		24.1301	23.6447	25.1351	24.9625	24.0756	24.0861	12	12	548.8
O00469	Procollagen-lysine,2-oxoglutarate 5-dioxygenase 2	PLOD2	PLOD2_HUMAN	0.00419861	1.00291	0.352594		2.05121	2.39818	2.18522	2.14912	2.12777	2.37706	12	11	501.3
Q9H488	GDP-fucose protein O-fucosyltransferase 1	POFUT1	OFUT1_HUMAN	0.00354449	1.00246	0.41698		2.34606	2.84979	2.36975	2.53041	2.40669	2.6471	5	5	208.14
A1L0T0	Acetolactate synthase-like protein	ILVBL	ILVBL_HUMAN	0.00353378	1.00245	0.644947		9.22817	10.4481	9.98779	8.45868	11.2238	10.0543	18	18	870.22
P22033	Methylmalonyl-CoA mutase, mitochondrial	MUT	MUTA_HUMAN	0.0032815	1.00228	0.29098		3.87614	4.14378	3.46711	3.89659	3.74854	3.86805	13	13	546.79
Q00325-2	Isoform B of Phosphate carrier protein, mitochondrial	SLC25A3	MPCP_HUMAN	0.00325439	1.00226	0.335009		55.0383	59.5185	53.9958	52.7945	54.3457	61.793	19	19	798.09
Q8IZP0-10;Q9NYB9-2	Isoform 10 of Abl interactor 1	ABI1	ABI1_HUMAN	0.00306035	1.00212	0.259505		0.93844	0.993299	0.959604	0.947131	0.904122	1.04623	5	5	184.13
Q13126-4	Isoform 4 of S-methyl-5'-thioadenosine phosphorylase	MTAP	MTAP_HUMAN	0.00257103	1.00178	0.64007		1.60208	1.60975	1.61423	1.34946	1.67216	1.81305	6	6	272.13
Q13492-3	Isoform 3 of Phosphatidylinositol-binding clathrin assembly protein	PICALM	PICAL_HUMAN	0.00240913	1.00167	0.681132		0.312971	0.305167	0.302178	0.3275	0.251364	0.342991	5	4	175.82
O75489	NADH dehydrogenase [ubiquinone] iron-sulfur protein 3, mitochondrial	NDUFS3	NDUS3_HUMAN	0.00239926	1.00166	0.124691		12.2579	12.4113	12.0753	12.7783	11.7842	12.2431	10	8	585.4
Q01658	Protein Dr1	DR1	NC2B_HUMAN	0.0022092	1.00153	0.795446		0.0670216	0.0501502	0.0762231	0.0803277	0.0571788	0.0561848	1	1	43.1
Q13616	Cullin-1	CUL1	CUL1_HUMAN	0.00218212	1.00151	0.453516		0.959806	0.894596	0.900968	0.836237	0.900151	1.02315	7	7	274.92
Q9BSK2	Solute carrier family 25 member 33	SLC25A33	S2533_HUMAN	0.00203998	1.00142	0.446713		0.994061	0.904884	0.806192	0.931992	0.909628	0.867346	4	4	183.46
Q8N0U8	Vitamin K epoxide reductase complex subunit 1-like protein 1	VKORC1L1	VKORL_HUMAN	0.00197686	1.00137	0.192489		0.683543	0.727138	0.687361	0.657361	0.703663	0.739895	2	2	99.18
Q9Y315	Putative deoxyribose-phosphate aldolase	DERA	DEOC_HUMAN	0.00191768	1.00133	0.313414		3.29297	3.29199	2.91234	2.96917	3.16857	3.37219	10	10	436.05
O43852	Calumenin	CALU	CALU_HUMAN	0.00170657	1.00118	0.661979		5.44598	5.26292	7.30949	6.45714	5.52114	6.06143	22	4	1191.19
Q9P2C4	Transmembrane protein 181	TMEM181	TM181_HUMAN	0.00170095	1.00118	0.675061		0.0787509	0.117259	0.0830948	0.0991339	0.0977378	0.0825627	2	2	111.32
P30837	Aldehyde dehydrogenase X, mitochondrial	ALDH1B1	AL1B1_HUMAN	0.00159267	1.0011	0.425892		10.1051	10.7658	9.57513	9.21377	10.852	10.4139	15	12	763.24
Q8WZA9	Immunity-related GTPase family Q protein	IRGQ	IRGQ_HUMAN	0.00148808	1.00103	0.812474		0.307134	0.277546	0.312658	0.357438	0.231171	0.309654	4	3	194.52
Q14232	Translation initiation factor eIF-2B subunit alpha	EIF2B1	EI2BA_HUMAN	0.00147539	1.00102	0.534419		1.22306	1.18645	0.963728	1.21017	1.0696	1.09692	6	6	282.4
P05023	Sodium/potassium-transporting ATPase subunit alpha-1	ATP1A1	AT1A1_HUMAN	0.0013589	1.00094	0.255044		110.85	121.804	105.65	107.601	113.927	117.095	48	46	2657.85
Q16706	Alpha-mannosidase 2	MAN2A1	MA2A1_HUMAN	0.00121683	1.00084	0.291121		3.3269	3.45808	3.32243	3.33552	3.11874	3.66168	19	18	918.7
O15047	Histone-lysine N-methyltransferase SETD1A	SETD1A	SET1A_HUMAN	0.00116887	1.00081	0.637937		0.0267917	0.0206278	0.0207608	0.0227412	0.0202112	0.0252831	1	1	90.07
Q9BRJ7	Protein syndesmos	NUDT16L1	SDOS_HUMAN	0.00113425	1.00079	0.154176		0.594816	0.605253	0.538546	0.572921	0.585253	0.581808	4	4	206.26
O95747	Serine/threonine-protein kinase OSR1	OXSR1	OXSR1_HUMAN	0.000674744	1.00047	0.285201		1.81826	1.69156	1.54832	1.67474	1.64829	1.73748	10	6	542.66
P62258	14-3-3 protein epsilon	YWHAE	1433E_HUMAN	0.000549978	1.00038	0.175514		53.8724	54.8977	49.1125	51.7353	53.8396	52.3679	22	19	1239.1
P49588	Alanine--tRNA ligase, cytoplasmic	AARS	SYAC_HUMAN	0.000192184	1.00013	0.413571		54.6506	64.2914	57.6597	54.8444	59.1938	62.5871	41	41	2450.56
O43829	Zinc finger and BTB domain-containing protein 14	ZBTB14	ZBT14_HUMAN	2.1965e-06	1	0.687415		8.40368	7.95725	9.17026	7.5115	9.86079	8.15892	1	1	10.97
Q96MT7-2	Isoform 2 of WD repeat-containing protein 52	WDR52	WDR52_HUMAN	-0.000337481	0.999766	0.871138		0.122474	0.0930586	0.145079	0.139271	0.136808	0.0844495	1	1	17.61
P51003	Poly(A) polymerase alpha	PAPOLA	PAPOA_HUMAN	-0.000396866	0.999725	0.487975		0.238929	0.203258	0.192766	0.199319	0.212904	0.222556	2	2	63.62
Q9BY49	Peroxisomal trans-2-enoyl-CoA reductase	PECR	PECR_HUMAN	-0.000404845	0.999719	0.394046		7.69803	8.79485	7.99374	7.60705	8.03973	8.83296	9	9	444.78
Q96P47	Arf-GAP with GTPase, ANK repeat and PH domain-containing protein 3	AGAP3	AGAP3_HUMAN	-0.000550164	-1.00038	0.588262		0.101352	0.138237	0.115802	0.11063	0.123901	0.120725	2	2	77.49
Q9Y2R5	28S ribosomal protein S17, mitochondrial	MRPS17	RT17_HUMAN	-0.000575614	-1.0004	0.568776		3.26086	3.34807	2.77439	2.92563	3.47181	2.98214	3	3	139.29
Q99959-2	Isoform 1 of Plakophilin-2	PKP2	PKP2_HUMAN	-0.000646769	-1.00045	0.121595		0.51164	0.521578	0.467039	0.496565	0.499278	0.503741	10	7	421.56
Q15388	Mitochondrial import receptor subunit TOM20 homolog	TOMM20	TOM20_HUMAN	-0.000790292	-1.00055	0.562287		3.6219	3.26472	3.43779	3.45575	3.74503	3.11798	2	2	41.34
P46379-2	Isoform 2 of Large proline-rich protein BAG6	BAG6	BAG6_HUMAN	-0.000962436	-1.00067	0.328931		4.90306	4.37119	4.35247	4.6201	4.55168	4.44585	16	16	771.5
P13489	Ribonuclease inhibitor	RNH1	RINI_HUMAN	-0.000992686	-1.00069	0.279589		11.159	12.0166	10.9602	10.5725	11.5356	12.0042	13	13	719.59
Q9NPD3	Exosome complex component RRP41	EXOSC4	EXOS4_HUMAN	-0.00127078	-1.00088	0.463218		0.608991	0.611297	0.519865	0.54466	0.557842	0.63612	3	2	174.3
O43813	LanC-like protein 1	LANCL1	LANC1_HUMAN	-0.00173546	-1.0012	0.577779		2.09598	2.34095	1.99254	2.13205	1.88486	2.40483	8	8	349.3
Q5BJF2	Transmembrane protein 97	TMEM97	TMM97_HUMAN	-0.00178109	-1.00124	0.576061		3.22437	3.46139	3.16892	3.16347	2.91634	3.76271	2	2	70.32
Q86W92-3	Isoform 3 of Liprin-beta-1	PPFIBP1	LIPB1_HUMAN	-0.00179789	-1.00125	0.284568		0.274759	0.272013	0.250189	0.266697	0.24693	0.282341	2	2	98.44
Q15257-4	Isoform 4 of Serine/threonine-protein phosphatase 2A activator	PPP2R4	PTPA_HUMAN	-0.00184816	-1.00128	0.901508		0.462083	0.583409	0.529321	0.363439	0.62029	0.589068	2	2	61.15
P37108	Signal recognition particle 14 kDa protein	SRP14	SRP14_HUMAN	-0.00215198	-1.00149	0.610669		12.5636	12.0912	14.1368	14.2951	12.3911	12.0476	4	3	261.71
O15235	28S ribosomal protein S12, mitochondrial	MRPS12	RT12_HUMAN	-0.002252	-1.00156	0.281967		0.412823	0.422114	0.367546	0.383039	0.409086	0.408482	3	3	76.14
O95372	Acyl-protein thioesterase 2	LYPLA2	LYPA2_HUMAN	-0.00238478	-1.00165	0.596099		8.65553	9.22138	10.7246	9.98901	8.66579	9.89948	8	8	388.1
P82932	28S ribosomal protein S6, mitochondrial	MRPS6	RT06_HUMAN	-0.00261059	-1.00181	0.70279		2.02675	1.71561	2.10736	2.21535	1.89757	1.72623	8	8	271.53
Q9BZE9	Tether containing UBX domain for GLUT4	ASPSCR1	ASPC1_HUMAN	-0.00274187	-1.0019	0.614975		0.749277	0.761766	0.779273	0.742597	0.857301	0.68607	3	3	133.9
P61081	NEDD8-conjugating enzyme Ubc12	UBE2M	UBC12_HUMAN	-0.00336697	-1.00234	0.670431		2.6139	2.59764	2.50131	2.96512	2.22925	2.5005	6	6	213.06
P22830	Ferrochelatase, mitochondrial	FECH	HEMH_HUMAN	-0.00340627	-1.00236	0.555491		1.61565	1.77247	1.57622	1.69527	1.44511	1.81225	7	6	286.88
P45974-2	Isoform Short of Ubiquitin carboxyl-terminal hydrolase 5	USP5	UBP5_HUMAN	-0.00389936	-1.00271	0.230745		5.94268	6.10918	5.67105	5.65538	5.66148	6.35823	18	17	885.24
P08559	Pyruvate dehydrogenase E1 component subunit alpha, somatic form, mitochondrial	PDHA1	ODPA_HUMAN	-0.004315	-1.003	0.383877		14.3752	13.5962	12.2507	13.6021	13.5764	12.9235	15	15	794.38
Q14258	E3 ubiquitin/ISG15 ligase TRIM25	TRIM25	TRI25_HUMAN	-0.00491672	-1.00341	0.334871		6.13433	5.54578	5.41182	5.44585	5.82048	5.76745	15	15	797.1
P60763	Ras-related C3 botulinum toxin substrate 3	RAC3	RAC3_HUMAN	-0.00494999	-1.00344	0.729842		0.273695	0.372988	0.29515	0.271102	0.297894	0.369612	5	1	204.54
A3KN83-3	Isoform 3 of Protein strawberry notch homolog 1	SBNO1	SBNO1_HUMAN	-0.00502657	-1.00349	0.590209		1.19284	1.04519	1.23548	1.04772	1.1593	1.25441	1	1	23.76
Q15631	Translin	TSN	TSN_HUMAN	-0.00503162	-1.00349	0.353255		10.2535	9.98484	8.72752	9.68501	9.69146	9.48853	9	9	354.51
Q9NRF9	DNA polymerase epsilon subunit 3	POLE3	DPOE3_HUMAN	-0.00514023	-1.00357	0.773912		0.255012	0.374183	0.552912	0.341043	0.486916	0.349943	2	1	79.01
Q9H814	Phosphorylated adapter RNA export protein	PHAX	PHAX_HUMAN	-0.00542432	-1.00377	0.628702		0.0276927	0.028791	0.0312752	0.0324079	0.0259052	0.0291165	2	1	51.31
O75380	NADH dehydrogenase [ubiquinone] iron-sulfur protein 6, mitochondrial	NDUFS6	NDUS6_HUMAN	-0.00544908	-1.00378	0.873645		0.0572505	0.0399426	0.0634268	0.0710494	0.0441927	0.0447722	1	1	60.28
Q9UNF0-2	Isoform 2 of Protein kinase C and casein kinase substrate in neurons protein 2	PACSIN2	PACN2_HUMAN	-0.00548312	-1.00381	0.564547		2.82021	2.81646	3.16486	2.95239	2.63468	3.18107	7	7	358.2
Q8NC54	Keratinocyte-associated transmembrane protein 2	KCT2	KCT2_HUMAN	-0.00552849	-1.00384	0.746624		0.292085	0.206875	0.249078	0.282122	0.248936	0.214119	1	1	24.54
P16615	Sarcoplasmic/endoplasmic reticulum calcium ATPase 2	ATP2A2	AT2A2_HUMAN	-0.00576093	-1.004	0.329861		49.4795	52.0323	46.6078	46.3816	51.7399	49.4078	42	42	2315.21
Q92504	Zinc transporter SLC39A7	SLC39A7	S39A7_HUMAN	-0.00591762	-1.00411	0.405844		0.500773	0.536284	0.441964	0.486926	0.50233	0.483711	3	3	90.39
Q9UIC8	Leucine carboxyl methyltransferase 1	LCMT1	LCMT1_HUMAN	-0.00608174	-1.00422	0.334099		0.462039	0.451809	0.416793	0.455175	0.447806	0.422063	4	4	180.84
Q96C86	m7GpppX diphosphatase	DCPS	DCPS_HUMAN	-0.00610944	-1.00424	0.845043		0.329744	0.422299	0.355909	0.40113	0.275021	0.427119	5	5	196.44
Q9BWM7	Sideroflexin-3	SFXN3	SFXN3_HUMAN	-0.0061446	-1.00427	0.647151		1.59935	1.93881	1.49766	1.56077	1.54386	1.90978	10	6	457.36
Q8WTT2	Nucleolar complex protein 3 homolog	NOC3L	NOC3L_HUMAN	-0.00618703	-1.0043	0.312767		1.89649	1.73851	1.86814	1.75714	1.83529	1.88717	9	9	376.46
Q96P48-3	Isoform 3 of Arf-GAP with Rho-GAP domain, ANK repeat and PH domain-containing protein 1	ARAP1	ARAP1_HUMAN	-0.00659158	-1.00458	0.307681		0.452633	0.482084	0.413059	0.455402	0.428697	0.457532	5	5	160.69
P31689	DnaJ homolog subfamily A member 1	DNAJA1	DNJA1_HUMAN	-0.0067477	-1.00469	0.283091		12.8989	13.361	12.5824	12.0809	13.5111	13.0691	16	14	747.28
Q86X29-5	Isoform 5 of Lipolysis-stimulated lipoprotein receptor	LSR	LSR_HUMAN	-0.00687557	-1.00478	0.519637		0.71135	0.747937	0.696305	0.740139	0.631623	0.773582	7	7	321.12
Q14554	Protein disulfide-isomerase A5	PDIA5	PDIA5_HUMAN	-0.00692897	-1.00481	0.376982		3.12385	3.44014	3.05963	3.08304	3.02734	3.46712	10	10	398.65
Q96KC2;Q9Y689	ADP-ribosylation factor-like protein 5B	ARL5B	ARL5B_HUMAN	-0.0069805	-1.00485	0.608663		0.36374	0.350121	0.297537	0.372223	0.316555	0.317738	3	3	122.85
P39656	Dolichyl-diphosphooligosaccharide--protein glycosyltransferase 48 kDa subunit	DDOST	OST48_HUMAN	-0.00703196	-1.00489	0.282889		38.1126	37.1643	34.7387	35.1256	38.158	36.1972	12	12	644.94
P61086	Ubiquitin-conjugating enzyme E2 K	UBE2K	UBE2K_HUMAN	-0.00714536	-1.00497	0.451672		1.57104	1.3816	1.37191	1.49815	1.34811	1.45692	5	4	193.68
O43290	U4/U6.U5 tri-snRNP-associated protein 1	SART1	SNUT1_HUMAN	-0.00728536	-1.00506	0.551079		1.88118	1.77429	1.88841	1.8683	1.96574	1.68191	8	8	530.36
Q14165	Malectin	MLEC	MLEC_HUMAN	-0.0075517	-1.00525	0.381078		8.51823	9.58444	8.28207	8.37165	8.51039	9.36495	13	12	602.17
P30260	Cell division cycle protein 27 homolog	CDC27	CDC27_HUMAN	-0.00766988	-1.00533	0.1846		0.369755	0.36522	0.359491	0.372441	0.363793	0.352429	2	2	116.38
Q12996	Cleavage stimulation factor subunit 3	CSTF3	CSTF3_HUMAN	-0.00775811	-1.00539	0.585809		0.878991	0.863078	0.925071	0.782042	0.949968	0.920826	6	5	304.83
Q13098-5	Isoform 4 of COP9 signalosome complex subunit 1	GPS1	CSN1_HUMAN	-0.00819366	-1.0057	0.540942		1.53905	1.42284	1.18845	1.40886	1.32049	1.39748	7	7	326.61
Q9Y3A6	Transmembrane emp24 domain-containing protein 5	TMED5	TMED5_HUMAN	-0.00876773	-1.0061	0.534069		8.50847	9.4362	9.66184	9.51391	8.31427	9.61106	6	6	262.95
O60293-2	Isoform 2 of Zinc finger C3H1 domain-containing protein	ZFC3H1	ZC3H1_HUMAN	-0.00877498	-1.0061	0.724947		0.0241467	0.045043	0.0404763	0.0377008	0.0331973	0.0381029	1	1	49.54
P07954-2	Isoform Cytoplasmic of Fumarate hydratase, mitochondrial	FH	FUMH_HUMAN	-0.0089755	-1.00624	0.303892		16.386	17.5216	14.9101	15.8692	15.975	16.6707	17	17	774.62
Q9BRQ8	Apoptosis-inducing factor 2	AIFM2	AIFM2_HUMAN	-0.00922291	-1.00641	0.342285		7.59899	7.23772	6.94847	6.76327	7.14212	7.74097	13	12	653.05
P03886	NADH-ubiquinone oxidoreductase chain 1	MT-ND1	NU1M_HUMAN	-0.00942997	-1.00656	0.748395		0.756255	0.904989	0.87625	0.697961	0.939853	0.883148	4	3	133.11
Q96K37	Solute carrier family 35 member E1	SLC35E1	S35E1_HUMAN	-0.00961129	-1.00668	0.958427		0.025836	0.0344834	0.0348819	0.0207671	0.0408349	0.0329671	1	1	65.45
Q68D91	Metallo-beta-lactamase domain-containing protein 2	MBLAC2	MBLC2_HUMAN	-0.009652	-1.00671	0.697131		0.296167	0.425768	0.330165	0.315829	0.336969	0.392287	5	5	237.24
Q9BV10	Dol-P-Man:Man(7)GlcNAc(2)-PP-Dol alpha-1,6-mannosyltransferase	ALG12	ALG12_HUMAN	-0.00997807	-1.00694	0.944405		0.0259686	0.0288174	0.0380265	0.0200971	0.0333463	0.0387293	1	1	23.91
Q9HD20	Probable cation-transporting ATPase 13A1	ATP13A1	AT131_HUMAN	-0.0103089	-1.00717	0.601354		2.0255	2.13081	1.86556	2.01138	1.75267	2.21494	14	12	646.43
Q96DV4	39S ribosomal protein L38, mitochondrial	MRPL38	RM38_HUMAN	-0.0103977	-1.00723	0.537514		3.36625	3.23194	3.31372	3.34163	3.49135	3.00775	5	5	241.36
Q86WB0	Nuclear-interacting partner of ALK	ZC3HC1	NIPA_HUMAN	-0.0106017	-1.00738	0.838475		0.178428	0.215753	0.190341	0.158495	0.238546	0.183202	2	2	84.03
P14314-2	Isoform 2 of Glucosidase 2 subunit beta	PRKCSH	GLU2B_HUMAN	-0.0107412	-1.00747	0.748883		58.3334	55.8611	78.0919	66.356	68.8524	55.6518	22	22	1055.45
Q9UBV2	Protein sel-1 homolog 1	SEL1L	SE1L1_HUMAN	-0.0108018	-1.00752	0.67373		4.85901	5.66734	5.13438	4.44901	5.58187	5.51303	13	13	699.63
Q01082-3	Isoform 2 of Spectrin beta chain, non-erythrocytic 1	SPTBN1	SPTB2_HUMAN	-0.0108131	-1.00752	0.740715		0.225947	0.227209	0.188465	0.186347	0.248193	0.202289	113	1	6346.61
P06733	Alpha-enolase	ENO1	ENOA_HUMAN	-0.0108974	-1.00758	0.20148		567.413	589.91	521.281	552.023	555.724	558.226	48	34	2799.6
Q9Y3E0	Vesicle transport protein GOT1B	GOLT1B	GOT1B_HUMAN	-0.0109266	-1.0076	0.779905		1.26227	1.10072	1.01078	0.957204	1.32819	1.06292	2	2	146.81
P67936	Tropomyosin alpha-4 chain	TPM4	TPM4_HUMAN	-0.0109324	-1.00761	0.885426		13.2928	11.5554	16.2454	15.5573	15.3014	9.9246	16	11	864.4
O95573	Long-chain-fatty-acid--CoA ligase 3	ACSL3	ACSL3_HUMAN	-0.0110676	-1.0077	0.425593		44.6256	49.2556	44.0981	42.1733	47.4385	47.313	35	32	1834.68
Q9Y2Z0-2	Isoform 2 of Suppressor of G2 allele of SKP1 homolog	SUGT1	SUGT1_HUMAN	-0.0112676	-1.00784	0.544135		1.87814	2.05086	1.96334	1.85077	1.80783	2.18789	9	9	399.76
Q9H9Y6-2	Isoform 2 of DNA-directed RNA polymerase I subunit RPA2	POLR1B	RPA2_HUMAN	-0.0114257	-1.00795	0.910836		0.160779	0.169504	0.175002	0.188801	0.120224	0.192275	4	4	124.82
Q6GMV3	Putative peptidyl-tRNA hydrolase PTRHD1	PTRHD1	PTRD1_HUMAN	-0.0114973	-1.008	0.96965		0.168187	0.140176	0.145854	0.193746	0.155243	0.101624	1	1	32.96
Q14738-2	Isoform Delta-2 of Serine/threonine-protein phosphatase 2A 56 kDa regulatory subunit delta isoform	PPP2R5D	2A5D_HUMAN	-0.0116192	-1.00809	0.621419		1.09649	1.17466	1.05923	1.08342	0.973068	1.24718	12	6	537.51
O75431-2	Isoform 2 of Metaxin-2	MTX2	MTX2_HUMAN	-0.011836	-1.00824	0.688474		3.98786	3.94782	3.96532	3.674	4.51661	3.61314	7	7	353.28
Q9UBU8-2	Isoform 2 of Mortality factor 4-like protein 1	MORF4L1	MO4L1_HUMAN	-0.0118981	-1.00828	0.585269		0.475949	0.429874	0.45507	0.476781	0.40081	0.472125	3	3	156.85
Q6Q788	Apolipoprotein A-V	APOA5	APOA5_HUMAN	-0.0122685	-1.00854	0.899053		0.158551	0.227254	0.266812	0.165133	0.291382	0.190576	3	3	90.39
Q16795	NADH dehydrogenase [ubiquinone] 1 alpha subcomplex subunit 9, mitochondrial	NDUFA9	NDUA9_HUMAN	-0.0124455	-1.00866	0.434004		8.56005	9.64214	8.23325	8.32352	8.54115	9.34371	18	17	904.12
P31930	Cytochrome b-c1 complex subunit 1, mitochondrial	UQCRC1	QCR1_HUMAN	-0.012543	-1.00873	0.462044		28.1015	31.6416	28.3017	27.1187	30.677	29.487	17	16	917.31
P30405	Peptidyl-prolyl cis-trans isomerase F, mitochondrial	PPIF	PPIF_HUMAN	-0.0127831	-1.0089	0.611518		25.5205	23.8866	24.3608	24.1378	26.7222	22.2572	10	10	589.21
O95905	Protein SGT1	ECD	SGT1_HUMAN	-0.0128864	-1.00897	0.737265		0.226641	0.144294	0.174729	0.189005	0.158911	0.192896	1	1	10.77
P51654	Glypican-3	GPC3	GPC3_HUMAN	-0.01294	-1.00901	0.426864		60.6604	61.1556	64.6621	58.6483	59.6048	66.5599	18	17	994.29
O43617-2	Isoform 2 of Trafficking protein particle complex subunit 3	TRAPPC3	TPPC3_HUMAN	-0.013048	-1.00909	0.660894		1.24066	1.38364	1.44673	1.37666	1.18289	1.47482	4	4	203.52
Q8IXI2-4	Isoform 4 of Mitochondrial Rho GTPase 1	RHOT1	MIRO1_HUMAN	-0.0131072	-1.00913	0.136869		0.562775	0.581662	0.533449	0.534502	0.549629	0.578581	4	3	154.95
P22695	Cytochrome b-c1 complex subunit 2, mitochondrial	UQCRC2	QCR2_HUMAN	-0.013309	-1.00927	0.467806		34.816	37.0719	31.925	32.0891	36.208	34.5625	18	17	1054.06
O75643	U5 small nuclear ribonucleoprotein 200 kDa helicase	SNRNP200	U520_HUMAN	-0.0133429	-1.00929	0.275323		48.4842	47.681	44.4076	44.3614	48.0298	46.8874	71	70	3768.24
P61218	DNA-directed RNA polymerases I, II, and III subunit RPABC2	POLR2F	RPAB2_HUMAN	-0.013353	-1.0093	0.971264		0.227473	0.160567	0.21405	0.245227	0.224901	0.126414	1	1	25.95
P26368-2	Isoform 2 of Splicing factor U2AF 65 kDa subunit	U2AF2	U2AF2_HUMAN	-0.0135178	-1.00941	0.512351		18.4237	19.8774	18.2239	16.9444	19.895	19.1585	9	9	368.73
Q9ULV4;P31146	Coronin-1C	CORO1C	COR1C_HUMAN	-0.0135518	-1.00944	0.504835		7.83516	7.78832	7.47045	7.65745	6.87485	8.34571	13	12	612.19
Q9H9B4	Sideroflexin-1	SFXN1	SFXN1_HUMAN	-0.0138008	-1.00961	0.652953		10.1319	12.2938	11.3126	10.132	10.753	12.5321	16	11	799.7
O60749-2	Isoform 2 of Sorting nexin-2	SNX2	SNX2_HUMAN	-0.0141219	-1.00984	0.505518		3.30349	3.39272	3.01266	3.32604	2.89988	3.38838	10	9	630.26
Q6ZSR9	Uncharacterized protein FLJ45252	n/a	YJ005_HUMAN	-0.0141596	-1.00986	0.659107		0.14958	0.207579	0.186722	0.171163	0.181577	0.18583	2	2	62.21
P29966	Myristoylated alanine-rich C-kinase substrate	MARCKS	MARCS_HUMAN	-0.0145306	-1.01012	0.888939		17.5784	14.6363	19.7862	14.4458	27.4024	9.63153	7	7	412.67
P05387	60S acidic ribosomal protein P2	RPLP2	RLA2_HUMAN	-0.0145356	-1.01013	0.956669		81.5013	71.2603	100.002	90.7553	103.952	55.5222	11	9	629.46
Q96JB2	Conserved oligomeric Golgi complex subunit 3	COG3	COG3_HUMAN	-0.0145368	-1.01013	0.336097		0.374409	0.404056	0.36268	0.355814	0.373945	0.399945	4	4	213.09
P21589	5'-nucleotidase	NT5E	5NTD_HUMAN	-0.0146205	-1.01019	0.455057		7.06196	8.07034	6.94762	7.31039	6.84907	7.69783	13	13	712.57
O43175	D-3-phosphoglycerate dehydrogenase	PHGDH	SERA_HUMAN	-0.0148096	-1.01032	0.124816		71.1526	75.0134	69.1714	69.0375	72.0368	72.0639	25	24	1507.61
O95822-2	Isoform Cytoplasmic+peroxisomal of Malonyl-CoA decarboxylase, mitochondrial	MLYCD	DCMC_HUMAN	-0.0149845	-1.01044	0.526204		0.1487	0.15072	0.136219	0.130584	0.14308	0.157475	3	3	109.81
Q9UBM1	Phosphatidylethanolamine N-methyltransferase	PEMT	PEMT_HUMAN	-0.0150022	-1.01045	0.900443		0.0955096	0.150505	0.130909	0.0919367	0.118448	0.16264	1	1	50.47
O15530-3	Isoform 3 of 3-phosphoinositide-dependent protein kinase 1	PDPK1	PDPK1_HUMAN	-0.0152063	-1.0106	0.486193		1.07099	1.21541	1.09859	1.10072	1.03969	1.2091	9	8	374.49
Q53LP3	Ankyrin repeat domain-containing protein SOWAHC	SOWAHC	SWAHC_HUMAN	-0.0153349	-1.01069	0.716459		0.181028	0.176006	0.202991	0.182978	0.205602	0.165523	3	3	174.52
P62942	Peptidyl-prolyl cis-trans isomerase FKBP1A	FKBP1A	FKB1A_HUMAN	-0.015409	-1.01074	0.824838		7.66706	6.79753	10.2165	9.85567	6.86336	7.69989	5	5	307.88
P49770	Translation initiation factor eIF-2B subunit beta	EIF2B2	EI2BB_HUMAN	-0.0154819	-1.01079	0.595082		1.36694	1.51775	1.38886	1.25911	1.51283	1.456	6	6	242.58
Q9NZB2	Constitutive coactivator of PPAR-gamma-like protein 1	FAM120A	F120A_HUMAN	-0.0155536	-1.01084	0.788674		0.165904	0.139168	0.12263	0.159309	0.145851	0.117954	3	2	177.97
Q9UGI8-2	Isoform 2 of Testin	TES	TES_HUMAN	-0.0156578	-1.01091	0.788035		1.63289	2.0303	1.59058	1.56529	1.53814	2.09363	8	8	318.63
Q6ZRP7	Sulfhydryl oxidase 2	QSOX2	QSOX2_HUMAN	-0.0159666	-1.01113	0.797706		0.367036	0.478628	0.410987	0.378677	0.363108	0.501036	7	7	295.91
P08034	Gap junction beta-1 protein	GJB1	CXB1_HUMAN	-0.0163753	-1.01142	0.886		0.123883	0.142555	0.119118	0.106913	0.111101	0.16319	1	1	17.61
P61106	Ras-related protein Rab-14	RAB14	RAB14_HUMAN	-0.0163903	-1.01143	0.27957		13.2046	13.5544	12.7854	12.2471	13.4222	13.4285	13	11	836.42
O95140	Mitofusin-2	MFN2	MFN2_HUMAN	-0.0164302	-1.01145	0.640022		2.01591	2.3562	2.056	1.92865	2.04364	2.38303	13	12	609.38
P11908	Ribose-phosphate pyrophosphokinase 2	PRPS2	PRPS2_HUMAN	-0.0165718	-1.01155	0.659411		0.593486	0.519591	0.516931	0.59421	0.518322	0.49886	9	3	506.34
P62314	Small nuclear ribonucleoprotein Sm D1	SNRPD1	SMD1_HUMAN	-0.016846	-1.01175	0.576593		6.76139	5.95579	5.569	6.18925	6.16627	5.71838	5	5	269.39
O75306-2	Isoform 2 of NADH dehydrogenase [ubiquinone] iron-sulfur protein 2, mitochondrial	NDUFS2	NDUS2_HUMAN	-0.016967	-1.01183	0.578757		9.54783	11.494	10.3457	9.54701	10.4552	11.0184	10	9	470.72
O15027-2	Isoform 2 of Protein transport protein Sec16A	SEC16A	SC16A_HUMAN	-0.0170327	-1.01188	0.0706029		1.61586	1.61046	1.61169	1.55526	1.60486	1.62111	11	11	411.98
Q9UL26	Ras-related protein Rab-22A	RAB22A	RB22A_HUMAN	-0.0170998	-1.01192	0.779541		0.0160434	0.0368819	0.0220911	0.0272063	0.018864	0.0280622	1	1	25.55
P07108	Acyl-CoA-binding protein	DBI	ACBP_HUMAN	-0.0175849	-1.01226	0.856856		14.2159	12.3377	20.689	19.9154	13.686	13.0689	5	5	250.69
Q16822	Phosphoenolpyruvate carboxykinase [GTP], mitochondrial	PCK2	PCKGM_HUMAN	-0.0176919	-1.01234	0.598718		28.2566	33.8234	28.9863	29.2457	27.8521	32.8585	24	23	1228.91
Q9NW13	RNA-binding protein 28	RBM28	RBM28_HUMAN	-0.0177508	-1.01238	0.362578		2.44241	2.57926	2.23578	2.36588	2.29378	2.50905	12	12	517.45
Q14204	Cytoplasmic dynein 1 heavy chain 1	DYNC1H1	DYHC1_HUMAN	-0.0181432	-1.01266	0.347344		68.3515	71.6374	65.6011	63.3251	68.2654	71.4302	145	141	6996.17
Q15006	ER membrane protein complex subunit 2	EMC2	EMC2_HUMAN	-0.0182653	-1.01274	0.610094		1.51348	1.73694	1.5318	1.50206	1.46081	1.75919	4	4	200
P54578-2	Isoform 2 of Ubiquitin carboxyl-terminal hydrolase 14	USP14	UBP14_HUMAN	-0.0182714	-1.01275	0.63707		5.62363	6.55979	5.8042	5.30967	5.93161	6.51996	14	14	656.54
P30041	Peroxiredoxin-6	PRDX6	PRDX6_HUMAN	-0.0183564	-1.01281	0.173059		82.885	81.4722	79.1715	82.4922	78.0679	79.8896	19	19	911.04
Q12965	Unconventional myosin-Ie	MYO1E	MYO1E_HUMAN	-0.0187855	-1.01311	0.505252		1.59502	1.41313	1.36068	1.48706	1.40372	1.42153	8	8	416.47
P12081-4	Isoform 4 of Histidine--tRNA ligase, cytoplasmic	HARS	SYHC_HUMAN	-0.0188851	-1.01318	0.363459		4.84545	4.94309	4.53448	4.61688	4.45202	5.06786	18	12	845.83
Q14571	Inositol 1,4,5-trisphosphate receptor type 2	ITPR2	ITPR2_HUMAN	-0.0191965	-1.01339	0.760066		2.52754	2.89237	2.50101	2.18988	2.87243	2.75391	26	17	1133.86
Q5T440	Putative transferase CAF17, mitochondrial	IBA57	CAF17_HUMAN	-0.0192634	-1.01344	0.744493		0.839742	1.06275	0.905478	0.821902	0.881344	1.06748	4	3	205.14
O60547-2	Isoform 2 of GDP-mannose 4,6 dehydratase	GMDS	GMDS_HUMAN	-0.0195717	-1.01366	0.275366		15.9868	15.5644	14.4017	14.7304	14.7642	15.8391	19	17	897.34
Q9BVG9	Phosphatidylserine synthase 2	PTDSS2	PTSS2_HUMAN	-0.0195837	-1.01367	0.637661		0.399101	0.434302	0.387042	0.354123	0.422826	0.427041	4	4	107.69
P00167-2	Isoform 2 of Cytochrome b5	CYB5A	CYB5_HUMAN	-0.0196059	-1.01368	0.87281		15.567	14.4568	17.6728	16.8235	17.9189	12.3105	6	6	325.96
Q5SRE5	Nucleoporin NUP188 homolog	NUP188	NU188_HUMAN	-0.0196095	-1.01369	0.427357		1.31892	1.38741	1.24909	1.24599	1.24451	1.41153	14	14	596.7
Q9Y6X9-2	Isoform 2 of MORC family CW-type zinc finger protein 2	MORC2	MORC2_HUMAN	-0.0198842	-1.01388	0.856937		0.118787	0.124252	0.095989	0.126183	0.0863869	0.121818	3	2	88.31
P49411	Elongation factor Tu, mitochondrial	TUFM	EFTU_HUMAN	-0.0199154	-1.0139	0.273761		49.0571	49.1663	44.9683	45.486	48.2529	47.4897	29	29	1525.78
P25705	ATP synthase subunit alpha, mitochondrial	ATP5A1	ATPA_HUMAN	-0.020459	-1.01428	0.390701		194.753	196.142	176.33	180.07	193.969	185.2	35	31	2015.56
Q8IUR7-3	Isoform 3 of Armadillo repeat-containing protein 8	ARMC8	ARMC8_HUMAN	-0.0206334	-1.0144	0.561201		0.377769	0.367914	0.343061	0.324368	0.377597	0.371318	6	5	125.94
O14763-2	Isoform Short of Tumor necrosis factor receptor superfamily member 10B	TNFRSF10B	TR10B_HUMAN	-0.0206548	-1.01442	0.856921		0.265735	0.273693	0.345701	0.323598	0.317632	0.231317	3	3	111.03
Q14997	Proteasome activator complex subunit 4	PSME4	PSME4_HUMAN	-0.0206812	-1.01444	0.510944		0.942523	0.820501	0.839947	0.853927	0.816165	0.89583	7	6	358.22
Q2M2I8-2	Isoform 2 of AP2-associated protein kinase 1	AAK1	AAK1_HUMAN	-0.0207581	-1.01449	0.435988		0.41705	0.397756	0.376426	0.365602	0.401814	0.406799	3	3	130.52
O95881	Thioredoxin domain-containing protein 12	TXNDC12	TXD12_HUMAN	-0.020773	-1.0145	0.83844		4.92047	4.17957	6.24016	6.1043	4.60619	4.41042	6	6	280.86
P17568	NADH dehydrogenase [ubiquinone] 1 beta subcomplex subunit 7	NDUFB7	NDUB7_HUMAN	-0.0207952	-1.01452	0.783552		3.81153	3.78945	5.24094	4.7937	3.99641	3.86802	9	9	369.48
Q9HBM6	Transcription initiation factor TFIID subunit 9B	TAF9B	TAF9B_HUMAN	-0.0209059	-1.0146	0.80574		0.0964076	0.0921111	0.156106	0.135497	0.102325	0.101845	2	2	89.28
Q96ST3	Paired amphipathic helix protein Sin3a	SIN3A	SIN3A_HUMAN	-0.0210055	-1.01467	0.609276		0.609963	0.591702	0.533835	0.59511	0.511102	0.604202	8	7	332.04
P55209-2	Isoform 2 of Nucleosome assembly protein 1-like 1	NAP1L1	NP1L1_HUMAN	-0.0213582	-1.01491	0.699275		21.8171	21.7323	22.781	20.1625	24.48	20.7131	9	8	512.42
O43301	Heat shock 70 kDa protein 12A	HSPA12A	HS12A_HUMAN	-0.0213619	-1.01492	0.640924		6.56805	5.80845	5.98237	6.50459	5.47324	6.11121	9	9	367.13
Q96JJ7	Protein disulfide-isomerase TMX3	TMX3	TMX3_HUMAN	-0.0217368	-1.01518	0.737132		0.0742216	0.0775246	0.0455605	0.0685283	0.0618481	0.0639797	1	1	29.81
P13984	General transcription factor IIF subunit 2	GTF2F2	T2FB_HUMAN	-0.0218685	-1.01527	0.909286		0.46753	0.468988	0.520255	0.425945	0.604933	0.403981	5	5	248.59
Q5T280	Uncharacterized protein C9orf114	C9orf114	CI114_HUMAN	-0.0220414	-1.0154	0.299615		0.803239	0.86046	0.78659	0.818584	0.764061	0.830493	4	4	162.89
[truncated: 2,462 more rows]

## Sheet: B - IPA analysis
Ingenuity Pathway Analysis of proteomics changes between control and APAP treated cells
© 2000-2014 QIAGEN. All rights reserved.
EIF2 Signalling
Symbol	Entrez Gene Name	GenPept/UniProt/Swiss-Prot Accession	Log Ratio	p-value	Expected*	Location	Type(s)	Significant?
RPS21	ribosomal protein S21	P63220	-0.459	0.214		Cytoplasm	other	N
RPL37A	ribosomal protein L37a	P61513	-0.407	0.0894	Up	Cytoplasm	other	N
RPS15	ribosomal protein S15	P62841	-0.398	0.0963		Cytoplasm	other	N
RPS19	ribosomal protein S19	P39019	-0.366	0.147		Cytoplasm	other	N
RPS15A	ribosomal protein S15a	P62244	-0.32	0.225		Cytoplasm	other	N
RPL31	ribosomal protein L31	P62899	-0.31	0.0693	Up	Cytoplasm	other	N
RPS12	ribosomal protein S12	P25398	-0.305	0.0538		Cytoplasm	other	N
RPL27	ribosomal protein L27	P61353	-0.292	0.0811	Up	Cytoplasm	other	N
EIF3J	eukaryotic translation initiation factor 3, subunit J	O75822	-0.286	0.256		Cytoplasm	translation regulator	N
RPS10	ribosomal protein S10	P46783	-0.284	0.158		Cytoplasm	other	N
RPS25	ribosomal protein S25	P62851	-0.269	0.246		Cytoplasm	other	N
RPL4	ribosomal protein L4	P36578	-0.263	0.0706	Up	Cytoplasm	enzyme	N
RPL19	ribosomal protein L19	P84098	-0.526	0.0255	Up	Cytoplasm	other	Y
RPL23A	ribosomal protein L23a	P62750	-0.484	0.00333	Up	Other	other	Y
RPL15	ribosomal protein L15	P61313	-0.402	0.0173	Up	Cytoplasm	other	Y
RPL36	ribosomal protein L36	Q9Y3U8	-0.374	0.00998	Up	Cytoplasm	other	Y
RPL24	ribosomal protein L24	P83731	-0.372	0.0143	Up	Cytoplasm	other	Y
PAIP1	poly(A) binding protein interacting protein 1	Q9H074	-0.367	0.0201		Cytoplasm	translation regulator	Y
RPS29	ribosomal protein S29	P62273	-0.367	0.00998		Cytoplasm	other	Y
EIF3B	eukaryotic translation initiation factor 3, subunit B	P55884	-0.357	0.0171		Cytoplasm	translation regulator	Y
EIF4A1	eukaryotic translation initiation factor 4A1	P60842	-0.316	0.00412		Cytoplasm	translation regulator	Y
RPL8	ribosomal protein L8	P62917	-0.313	0.00583	Up	Other	other	Y
EIF3D	eukaryotic translation initiation factor 3, subunit D	O15371	-0.306	0.05		Cytoplasm	other	Y
EIF5	eukaryotic translation initiation factor 5	P55010	-0.305	0.00724	Up	Cytoplasm	translation regulator	Y
RPS8	ribosomal protein S8	P62241	-0.303	0.0062		Cytoplasm	other	Y
RPL12	ribosomal protein L12	P30050	-0.302	0.0365	Up	Nucleus	other	Y
EIF3H	eukaryotic translation initiation factor 3, subunit H	O15372	-0.298	0.00867		Cytoplasm	other	Y
RPL13	ribosomal protein L13	P26373	-0.295	0.0119	Up	Cytoplasm	other	Y
RPS3A	ribosomal protein S3A	P61247	-0.292	0.0145		Nucleus	other	Y
RPS4Y1	ribosomal protein S4, Y-linked 1	P22090	-0.288	0.0298		Cytoplasm	other	Y
RPL27A	ribosomal protein L27a	P46776	-0.277	0.019	Up	Nucleus	other	Y
RPL10A	ribosomal protein L10a	P62906	-0.275	0.00979	Up	Nucleus	other	Y
RPS13	ribosomal protein S13	P62277	-0.273	0.00289		Other	other	Y
RPL21	ribosomal protein L21	P46778	-0.267	0.024	Up	Cytoplasm	other	Y
RPL17	ribosomal protein L17	P18621	-0.265	0.000428	Up	Cytoplasm	other	Y
RPS2	ribosomal protein S2	P15880	-0.265	0.0339		Cytoplasm	other	Y
RPL22	ribosomal protein L22	P35268	-0.262	0.00122	Up	Nucleus	other	Y
GRB2	growth factor receptor-bound protein 2	P62993	0.4	0.0396	Up	Cytoplasm	other	Y
EIF4A2	eukaryotic translation initiation factor 4A2	Q14240	0.447	0.00468		Cytoplasm	translation regulator	Y
Pentose Phosphate Pathway
Symbol	Entrez Gene Name	GenPept/UniProt/Swiss-Prot Accession	Log Ratio	p-value	Expected	Location	Type(s)	Significant?
G6PD	glucose-6-phosphate dehydrogenase	P11413	0.863	8.1e-05		Cytoplasm	enzyme	Y
H6PD	hexose-6-phosphate dehydrogenase (glucose 1-dehydrogenase)	O95479	0.351	0.00231		Cytoplasm	enzyme	Y
PGD	phosphogluconate dehydrogenase	P52209	0.337	0.00131		Cytoplasm	enzyme	Y
TALDO1	transaldolase 1	P37837	0.28	0.0054		Cytoplasm	enzyme	Y
PGLS	6-phosphogluconolactonase	O95336	0.274	0.000234		Cytoplasm	enzyme	Y
RPIA	ribose 5-phosphate isomerase A	P49247	-0.603	0.0224		Cytoplasm	enzyme	Y
Pentose Phosphate Pathway (Oxidative Branch)
Symbol	Entrez Gene Name	GenPept/UniProt/Swiss-Prot Accession	Log Ratio	p-value	Expected	Location	Type(s)	Significant?
G6PD	glucose-6-phosphate dehydrogenase	P11413	0.863	8.1e-05		Cytoplasm	enzyme	Y
H6PD	hexose-6-phosphate dehydrogenase (glucose 1-dehydrogenase)	O95479	0.351	0.00231		Cytoplasm	enzyme	Y
PGD	phosphogluconate dehydrogenase	P52209	0.337	0.00131		Cytoplasm	enzyme	Y
PGLS	6-phosphogluconolactonase	O95336	0.274	0.000234		Cytoplasm	enzyme	Y
Cell Cycle: G2/M DNA Damage Checkpoint Regulation
Symbol	Entrez Gene Name	GenPept/UniProt/Swiss-Prot Accession	Log Ratio	p-value	Expected	Location	Type(s)	Significant?
CCNB1	cyclin B1	P14635	1.24	0.0188	Down	Cytoplasm	kinase	Y
TOP2A	topoisomerase (DNA) II alpha 170kDa	P11388	0.684	0.000424	Down	Nucleus	enzyme	Y
SFN	stratifin	P31947	0.61	0.004	Up	Cytoplasm	other	Y
SKP1	S-phase kinase-associated protein 1	P63208	0.543	0.0156	Down	Nucleus	transcription regulator	Y
RPS6KA1	ribosomal protein S6 kinase, 90kDa, polypeptide 1	Q15418	0.416	0.000403	Down	Cytoplasm	kinase	Y
YWHAG	tyrosine 3-monooxygenase/tryptophan 5-monooxygenase activation protein, gamma	P61981	0.339	0.0377		Cytoplasm	other	Y
YWHAH	tyrosine 3-monooxygenase/tryptophan 5-monooxygenase activation protein, eta	Q04917	0.302	0.0102		Cytoplasm	transcription regulator	Y
TOP2B	topoisomerase (DNA) II beta 180kDa	Q02880	-0.372	0.0421	Down	Nucleus	enzyme	Y
TRIP12	thyroid hormone receptor interactor 12	Q14669	-0.416	0.00192	Down	Cytoplasm	enzyme	Y
NRF2-mediated Oxidative Stress Response
Symbol	Entrez Gene Name	GenPept/UniProt/Swiss-Prot Accession	Log Ratio	p-value	Expected	Location	Type(s)	Significant?
DNAJC1	DnaJ (Hsp40) homolog, subfamily C, member 1	Q96KC8	1.611	0.185		Cytoplasm	other	N
FTL	ferritin, light polypeptide	P02792	1.023	0.00936	Up	Cytoplasm	enzyme	Y
SQSTM1	sequestosome 1	Q13501	0.859	0.000128	Up	Cytoplasm	transcription regulator	Y
GSTT1	glutathione S-transferase theta 1	P30711	0.613	0.0007		Cytoplasm	enzyme	Y
GSTM3	glutathione S-transferase mu 3 (brain)	P21266	0.57	0.00171		Cytoplasm	enzyme	Y
DNAJC9	DnaJ (Hsp40) homolog, subfamily C, member 9	Q8WXX5	0.557	0.00796		Nucleus	other	Y
EPHX1	epoxide hydrolase 1, microsomal (xenobiotic)	P07099	0.534	0.000649	Up	Cytoplasm	peptidase	Y
NQO2	NAD(P)H dehydrogenase, quinone 2	P16083	0.524	0.00726		Cytoplasm	enzyme	Y
AKR7A2	aldo-keto reductase family 7, member A2 (aflatoxin aldehyde reductase)	O43488	0.522	0.000246		Cytoplasm	enzyme	Y
FKBP5	FK506 binding protein 5	Q13451	0.428	0.00913		Nucleus	enzyme	Y
SOD1	superoxide dismutase 1, soluble	P00441	0.413	0.179		Cytoplasm	enzyme	N
GCLC	glutamate-cysteine ligase, catalytic subunit	P48506	0.392	0.00417	Up	Cytoplasm	enzyme	Y
DNAJB1	DnaJ (Hsp40) homolog, subfamily B, member 1	P25685	0.356	0.00858		Nucleus	other	Y
FTH1	ferritin, heavy polypeptide 1	P02794	0.35	0.104	Up	Cytoplasm	enzyme	N
GSTK1	glutathione S-transferase kappa 1	Q9Y2Q3	0.267	0.00566		Cytoplasm	enzyme	Y
AOX1	aldehyde oxidase 1	Q06278	-0.263	0.33	Up	Cytoplasm	enzyme	N
DNAJA3	DnaJ (Hsp40) homolog, subfamily A, member 3	Q96EY1	-0.284	0.0448		Cytoplasm	other	Y
DNAJC7	DnaJ (Hsp40) homolog, subfamily C, member 7	Q99615	-0.313	0.028		Cytoplasm	other	Y
DNAJB12	DnaJ (Hsp40) homolog, subfamily B, member 12	Q9NXW2	-0.335	0.13		Cytoplasm	other	N
HMOX1	heme oxygenase (decycling) 1	P09601	-0.364	0.0878	Up	Cytoplasm	enzyme	N
Glutathione-mediated Detoxification
Symbol	Entrez Gene Name	GenPept/UniProt/Swiss-Prot Accession	Log Ratio	p-value	Expected	Location	Type(s)	Significant?
GSTT1	glutathione S-transferase theta 1	P30711	0.613	0.0007		Cytoplasm	enzyme	Y
GSTM3	glutathione S-transferase mu 3 (brain)	P21266	0.57	0.00171		Cytoplasm	enzyme	Y
GGH	gamma-glutamyl hydrolase (conjugase, folylpolygammaglutamyl hydrolase)	Q92820	0.405	0.00326		Cytoplasm	peptidase	Y
GSTK1	glutathione S-transferase kappa 1	Q9Y2Q3	0.267	0.00566		Cytoplasm	enzyme	Y
* expected regulation if the pathway/process were activated

## Sheet: C - SNOSOH proteome
Protein identifiers				Modification features				comparison of identfiied SNO/SOH sites with information available in repositires of reversible cysteine modifications		normalised and corrected by changes in protein abudance, changes in SNO and SOH levels, expressed as log2 values of respective ratios						Raw reporter ion intensities extracted from MSMS spectra																		Modification site occupancy [%]
																																		CONTROL										APAP
UniProt accession	Protein name	Gene name	Short name	Sequence	Modification	Mod. type	Mod.site on protein	Redox DB	dbSNO	log2 SNO-TCEP_R1	log2 SNO-TCEP_R2	log2 SNO-TCEP_R3	log2 SOH-TCEP_R1	log2 SOH-TCEP_R2	log2 SOH-TCEP_R3	TCEP CTRL	TCEP APAP	SNO CTRL	SNO APAP	SOH CTRL	SOH APAP	TCEP CTRL	TCEP APAP	SNO CTRL	SNO APAP	SOH CTRL	SOH APAP	TCEP CTRL	TCEP APAP	SNO CTRL	SNO APAP	SOH CTRL	SOH APAP	%SNO_CTRL_R1	%SNO_CTRL_R2	%SNO_CTRL_R3	av. %SNO_CTRL	stdev av. %SNO_CTRL	%SOH_CTRL_R1	%SOH_CTRL_R2	%SOH_CTRL_R3	av. %SOH_CTRL	stdev av. %SOH_CTRL	%SNO_APAP_R1	%SNO_APAP_R2	%SNO_APAP_R3	av. %SNO_APAP	stdev av. %SNO_APAP	%SOH_APAP_R1
																126_R1	127_R1	128_R1	129_R1	130_R1	131_R1	126_R2	127_R2	128_R2	129_R2	130_R2	131_R2	126_R3	127_R3	128_R3	129_R3	130_R3	131_R3
P0CG39	POTE ankyrin domain family member J	POTEJ	POTEJ_HUMAN	LcYVALDFEQEMAMVASSSSLEK	C2(TMT6-)	SNO, SOH	880	n/a	n/a	n/a	-0.20007	0.215212	n/a	0.0380619	0.154268	n/a	n/a	n/a	n/a	n/a	n/a	13243.7	10376.1	7160.35	7297.37	11322.7	9304.43	13893.5	16173.3	13426.6	16340	13869.9	19891.6	n/a	5.40662	9.66395	7.53528	3.01039	n/a	8.54951	9.98305	9.26628	1.01367	n/a	7.03284	10.1031	8.56795	2.17097	n/a
P02787	Serotransferrin	TF	TRFE_HUMAN	SAGWNIPIGLLYcDLPEPR	C13(TMT6-)	SNO, SOH	156	S-nitrosylation	n/a	n/a	-0.685509	0.275327	n/a	0.100101	-0.00486816	n/a	n/a	n/a	n/a	n/a	n/a	48595.8	46485.1	24174.2	21485.3	27162.9	28450	103453	116604	66199.4	81324.2	82157.2	102169	n/a	4.97454	6.39901	5.68678	1.00725	n/a	5.58957	7.94153	6.76555	1.66309	n/a	4.62197	6.97441	5.79819	1.66343	n/a
P10599	Thioredoxin	TXN	THIO_HUMAN	LVVVDFSATWcGPcK	C11(Carbamidomethyl); C14(TMT6-)	SNO, SOH	35	32, intramolecular disulfide; 35, intramolecular disulfide; 62, intramolecular disulfide & S-nitrosylation; 69, intramolecular disulfide & S-nitrosylation; 73, S-glutathionylation & S-nitrosylation	62;69;73	n/a	-0.0269796	-0.0875966	n/a	0.200263	-0.0249865	n/a	n/a	n/a	n/a	n/a	n/a	26320	21461.3	15569	18618.4	14881.9	14242	44020.9	50091.7	18657.8	17993.3	14950.7	18510.3	n/a	5.91529	4.2384	5.07684	1.18574	n/a	5.65423	3.39627	4.52525	1.59662	n/a	8.67534	3.59208	6.13371	3.59441	n/a
Q13162	Peroxiredoxin-4	PRDX4	PRDX4_HUMAN	SINTEVVAcSVDSQFTHLAWINTPR	C9(TMT6-)	SNO, SOH	148	124, intermolecular disulfide & sulfenic acid; 148, S-nitrosylation; 245, intermolecular disulfide	n/a	n/a	-0.496149	-0.101291	n/a	-0.563811	-0.848286	n/a	n/a	n/a	n/a	n/a	n/a	27262.2	26970.3	6215.65	6514.62	5404.18	3694.77	27985.3	44712.1	13709.6	18388.3	15396.1	15125.7	n/a	2.27995	4.89887	3.58941	1.85185	n/a	1.9823	5.50151	3.7419	2.48846	n/a	2.41548	4.11261	3.26404	1.20005	n/a
P42704	Leucine-rich PPR motif-containing protein, mitochondrial	LRPPRC	LPPRC_HUMAN	IHDVLcK	C6(TMT6-)	SNO, SOH	863	n/a	930	1.14825	-0.640307	0.542838	-0.220265	-1.48227	-0.348929	17159	13523.3	1869.86	5270.95	2232.08	1523.92	112075	95888.9	28767.2	23596	95776.7	29961.8	140710	142925	16021.1	21350.2	17908.6	15811.6	1.08972	2.56678	1.13859	1.59837	0.83903	1.30082	8.54576	1.27273	3.70644	4.191	3.89768	2.46076	1.4938	2.61741	1.20957	1.12688
P07900	Heat shock protein HSP 90-alpha	HSP90AA1	HS90A_HUMAN	VFImDNcEELIPEYLNFIR	M4(Oxidation); C7(TMT6-)	SNO, SOH	374	597, S-nitrosylation; 598, S-nitrosylation	420;481;597;598	n/a	-0.359878	-0.498915	n/a	-1.12053	0.499512	n/a	n/a	n/a	n/a	n/a	n/a	17134	16253.3	6423.77	7095.3	6251.66	2786.26	23825.2	23000.6	10824	6659.09	5510.55	8325.97	n/a	3.74914	4.54308	4.14611	0.561404	n/a	3.64869	2.31291	2.9808	0.944537	n/a	4.36546	2.89518	3.63032	1.03964	n/a
P0CW22	40S ribosomal protein S17-like	RPS17L	RS17L_HUMAN	RVcEEIAIIPSK	C3(TMT6-)	SNO, SOH	35	n/a	n/a?	n/a	-0.817428	-0.914518	n/a	-0.116153	1.85593	n/a	n/a	n/a	n/a	n/a	n/a	78237	69436.6	36771.6	27672.7	33945.2	28395.2	17065	12901.5	8285.98	2992.91	2321.98	7034.81	n/a	4.70003	4.85555	4.77779	0.109968	n/a	4.33877	1.36067	2.84972	2.10583	n/a	3.98532	2.31982	3.15257	1.17768	n/a
P15880	40S ribosomal protein S2	RPS2	RS2_HUMAN	IGKPHTVPcK	C9(TMT6-)	SNO, SOH	182	n/a	229	n/a	-0.437917	-0.446883	n/a	-1.21466	-0.578004	n/a	n/a	n/a	n/a	n/a	n/a	7897.47	5943.92	2183.54	1812.81	1678.33	555.992	11377.1	14257.2	2563.9	2122.71	3858.31	3585.67	n/a	2.76486	2.25355	2.50921	0.361551	n/a	2.12515	3.39128	2.75822	0.895291	n/a	3.04986	1.48887	2.26936	1.10379	n/a
P84090	Enhancer of rudimentary homolog	ERH	ERH_HUMAN	TYADYESVNEcMEGVcK	C11(Carbamidomethyl); C16(TMT6-)	SNO, SOH	33	n/a	n/a	-0.743259	0.0423147	-0.279913	-0.294951	0.106974	-0.0389194	22361.8	26766.2	12811.9	14783.8	9027.3	8888.22	50561.4	48416.7	12602	18568.8	13142.9	13846.1	43056.3	48181	11585.8	9616.47	6189.64	7463.73	5.72939	2.49241	2.69085	3.63755	1.8143	4.03693	2.5994	1.43757	2.6913	1.30211	5.5233	3.83521	1.99591	3.7848	1.76424	3.32069
P04040	Catalase	CAT	CATA_HUMAN	LGPNYLHIPVNcPYR	C12(TMT6-)	SNO, SOH	377	377, NA	n/a	n/a	-0.313172	-0.517904	n/a	-0.398248	-0.440137	n/a	n/a	n/a	n/a	n/a	n/a	59639.7	57257.5	16020.7	18498.5	17117.5	12738.3	57960	81406.1	19651.5	17359.3	13156.5	15077.9	n/a	2.68625	3.39053	3.03839	0.498001	n/a	2.87016	2.26992	2.57004	0.424431	n/a	3.23076	2.13244	2.6816	0.776632	n/a
P07306	Asialoglycoprotein receptor 1	ASGR1	ASGR1_HUMAN	TccPVNWVEHER	C2(TMT6-); C3(Carbamidomethyl)	SNO, SOH	153	n/a	n/a	0.174015	0.0579502	0.334269	-0.384604	-0.201681	0.150473	63442.5	61027.4	19819.5	34710	18308.2	13613.8	76620.3	69216.5	24002.3	33728.4	19762.1	15857.8	46677.4	48639.5	17843.7	21110.8	10085.7	12913.8	3.12401	3.13263	3.82276	3.3598	0.40096	2.88579	2.57923	2.16072	2.54191	0.363973	5.6876	4.87288	4.34026	4.96692	0.678578	2.23077
P61088	Ubiquitin-conjugating enzyme E2 N	UBE2N	UBE2N_HUMAN	IcLDILK	C2(TMT6-)	SNO, SOH	87	S-glutathionylation	87	-0.189106	n/a	-0.201176	-0.679292	n/a	-0.28467	109830	113444	12575.2	18385.8	26406.2	17188.8	n/a	n/a	n/a	n/a	n/a	n/a	142729	123399	21716	14707.2	28758.5	22596.3	1.14497	n/a	1.52148	1.33323	0.266231	2.40429	n/a	2.0149	2.20959	0.275339	1.6207	n/a	1.19185	1.40627	0.303246	1.51518
P39023	60S ribosomal protein L3	RPL3	RL3_HUMAN	VAcIGAWHPAR	C3(TMT6-)	SNO, SOH	253	n/a	118	-0.159323	-0.347037	-0.393678	0.0488176	0.849414	-0.239308	244366	199570	70209.6	82855.9	108389	92406	88992.1	77242	18614.3	18980.7	7064.25	11285.5	92099.7	103095	27221.6	20888.1	8641.37	9071.75	2.87314	2.09168	2.95567	2.64016	0.47679	4.43551	0.793806	0.938262	2.05586	2.06211	4.15173	2.4573	2.0261	2.87838	1.12363	4.63027
O15460	Isoform IIa of Prolyl 4-hydroxylase subunit alpha-2	P4HA2	P4HA2_HUMAN	HAAcPVLVGcK	C4(TMT6-); C10(TMT6-)	SNO, SOH	504; 510	n/a	n/a	-0.549961	-0.406896	0.0599136	-0.371184	-0.129698	-0.685227	79975.4	86649.2	16497.4	19701.6	23335.4	19726.6	169476	156625	27256.7	28390.3	27690.2	23894.1	95669.6	135457	14213.9	18892.5	12973.9	12647.2	2.06281	1.60829	1.48573	1.71894	0.304035	2.91782	1.63387	1.35612	1.96927	0.833124	2.27372	1.81263	1.39472	1.82703	0.439675	2.2766
P48444	Coatomer subunit delta	ARCN1	COPD_HUMAN	VLLAAAVcTK	C8(TMT6-)	SNO, SOH	9	n/a	441	0.200697	-0.0638933	0.0355657	-0.328277	0.475117	-0.0134647	43996.6	32505.5	10967.5	15027.7	2474.01	1469.21	54422.2	45762.1	24193.6	29082.4	16732.9	19979.4	41163	42288	22451.6	21290.1	9129.96	10287.1	2.4928	4.44555	5.45431	4.13089	1.50562	0.562319	3.07465	2.218	1.95166	1.27717	4.62314	6.35512	5.03453	5.3376	0.904889	0.451989
P56537	Eukaryotic translation initiation factor 6	EIF6	IF6_HUMAN	LSALGNVTTcNDYVALVHPDLDR	C10(TMT6-)	SNO, SOH	110	S-glutathionylation	n/a	n/a	-0.351847	0.0751526	n/a	-1.72375	-0.0117062	n/a	n/a	n/a	n/a	n/a	n/a	36762.6	36166	10817	12460	6263.07	1905.62	32144.9	34948.9	11763.1	12133.3	6853.89	8182.8	n/a	2.9424	3.65939	3.3009	0.506992	n/a	1.70365	2.13219	1.91792	0.30302	n/a	3.44522	3.47173	3.45848	0.0187395	n/a
P62280	40S ribosomal protein S11	RPS11	RS11_HUMAN	cPFTGNVSIR	C1(TMT6-)	SNO, SOH	60	n/a	79; 131	-0.344347	-0.221735	0.0706758	0.0757371	-0.114615	-0.277391	189602	164324	41233.9	45424.2	27489.6	25339.2	120990	103255	36089.1	39465.8	25990.7	20928.3	172799	196721	38535.2	41491.2	31733.3	32998.2	2.17476	2.98281	2.23006	2.46254	0.451411	1.44986	2.14817	1.83643	1.81149	0.349822	2.7643	3.82216	2.10914	2.89853	0.864362	1.54202
P36578	60S ribosomal protein L4	RPL4	RL4_HUMAN	SGQGAFGNmcR	M9(Oxidation); C10(TMT6-)	SNO, SOH	96	n/a	96; 208; 250	n/a	-0.0437902	0.4809	n/a	0.0181669	-0.0732959	n/a	n/a	n/a	n/a	n/a	n/a	32595.9	24696.6	9365.3	10286	6969.02	5462.23	24430.6	27093.5	5556.96	7745.46	3579.04	4176.4	n/a	2.87315	2.27459	2.57387	0.423246	n/a	2.138	1.46498	1.80149	0.475897	n/a	4.16494	2.85879	3.51186	0.92359	n/a
P14866	Heterogeneous nuclear ribonucleoprotein L	HNRNPL	HNRPL_HUMAN	QPAIMPGQSYGLEDGScSYK	C17(TMT6-)	SNO, SOH	460	n/a	260; 261; 452; 581	0.0617668	-0.218368	-0.0375748	0.356205	-1.21043	-0.0516511	38262.1	32903.6	7789.25	11282.3	6012.3	6678.98	33035.7	31037.6	6943.11	8378.3	7846.74	3254.42	37106.1	39090.5	6226.96	5755.77	5290.44	5953.01	2.03576	2.1017	1.67815	1.93854	0.227901	1.57135	2.37523	1.42576	1.79078	0.511359	3.4289	2.6994	1.47242	2.53357	0.988723	2.02986
P36542	ATP synthase subunit gamma, mitochondrial	ATP5C1	ATPG_HUMAN	GLcGAIHSSIAK	C3(TMT6-)	SNO, SOH	103	n/a	n/a	0.0783395	-0.745658	n/a	-0.252158	-0.0146269	n/a	48954.4	47038.3	8993.66	14723.5	6808.98	5543.72	75918.4	82800.2	26230.7	25495.4	16528.4	18229.2	n/a	n/a	n/a	n/a	n/a	n/a	1.83715	3.45512	n/a	2.64614	1.14408	1.39088	2.17713	n/a	1.78401	0.555963	3.13012	3.07914	n/a	3.10463	0.036043	1.17855
P21333	Isoform 2 of Filamin-A	FLNA -	FLNA_HUMAN	IVGPSGAAVPcK	C11(TMT6-)	SNO, SOH	1018	n/a	444; 717; 810; 1260; 2543	n/a	-0.552926	-0.444969	n/a	0.00614297	-0.2219	n/a	n/a	n/a	n/a	n/a	n/a	79771.9	80034.7	31296.8	31982.5	16280	16756.7	91066.7	104719	43626.8	33188.2	13441.6	14671.9	n/a	3.92328	4.79065	4.35696	0.613319	n/a	2.04082	1.47601	1.75842	0.399381	n/a	3.99608	3.16926	3.58267	0.584652	n/a
Q7Z4W1	L-xylulose reductase	DCXR	DCXR_HUMAN	GVPGAIVNVSSQcSQR	C13(TMT6-)	SNO, SOH	138	138, intramolecular disulfide; 150, intramolecular disulfide	n/a	-0.995645	-0.49957	n/a	-0.0413749	-0.282224	n/a	5916.71	7992.72	2769.64	3027.98	1505.8	1994.77	37364.1	38944	8556.76	9426.31	3445.81	3017	n/a	n/a	n/a	n/a	n/a	n/a	4.68105	2.2901	n/a	3.48558	1.69066	2.545	0.922224	n/a	1.73361	1.14748	3.78842	2.42048	n/a	3.10445	0.96728	2.49574
P78527	DNA-dependent protein kinase catalytic subunit	PRKDC	PRKDC_HUMAN	ELLNPVVEFVSHPSTTcR	C17(TMT6-)	SNO, SOH	2469	n/a	25; 478; 795; 1499; 1507; 2342; 3187; 3347; 4045	0.0975675	0.170161	-0.298898	0	0.346714	-0.10026	2506.85	2118.13	1023.51	1493.21	0	0	38374.4	27384	9574.4	11487.5	8391.62	7779.1	26648.2	39613.4	11980.1	13036.8	7951.82	12207.5	4.08286	2.495	4.49566	3.69117	1.05628	0	2.18678	2.984	1.72359	1.54498	7.04967	4.19494	3.29101	4.84521	1.96189	0
Q96QK1	Vacuolar protein sorting-associated protein 35	VPS35	VPS35_HUMAN	QIVLTGILEQVVNcR	C14(TMT6-)	SNO, SOH	253	n/a	n/a	n/a	0.0863568	0.0526557	n/a	-1.18759	-0.224608	n/a	n/a	n/a	n/a	n/a	n/a	44244.7	39705.2	6029.17	8583.65	7524.94	3028.61	22953.2	24455.4	4801.17	4777.96	3921.85	3958.92	n/a	1.36269	2.09172	1.7272	0.515503	n/a	1.70076	1.70863	1.70469	0.00556634	n/a	2.16185	1.95374	2.0578	0.147152	n/a
O95372	Acyl-protein thioesterase 2	LYPLA2	LYPA2_HUMAN	YIcPHAPR	C3(TMT6-)	SNO, SOH	56	n/a	56	-0.273291	-0.41421	0.106994	-0.779158	0.29767	0.310468	24334.3	23477.4	9380.85	12084.7	4250.78	2411.66	76483	77711	19918.1	22693.9	18640.3	23781.2	118803	138532	32991.8	37312.1	10981.9	17580.3	3.85499	2.60426	2.77702	3.07875	0.677765	1.74683	2.43718	0.924375	1.70279	0.757365	5.14739	2.92029	2.69339	3.58703	1.35607	1.02723
P02787	Serotransferrin	TF	TRFE_HUMAN	WcALSHHER	C2(TMT6-)	SNO, SOH	364	S-nitrosylation	n/a	n/a	-0.173233	0.352626	n/a	0.304029	-0.307297	n/a	n/a	n/a	n/a	n/a	n/a	120169	122578	24710.2	33402.6	18771.7	24149.1	84390.9	84235.7	21479	24653.5	15432.2	13781.3	n/a	2.05628	2.54518	2.30073	0.345703	n/a	1.5621	1.82865	1.69538	0.18848	n/a	2.725	2.92673	2.82586	0.142644	n/a
P68036	Ubiquitin-conjugating enzyme E2 L3	UBE2L3	UB2L3_HUMAN	GQVcLPVISAENWKPATK	C4(TMT6-)	SNO, SOH	86	S-nitrosylation	86	n/a	0.157537	-0.121973	n/a	-1.048	-0.194362	n/a	n/a	n/a	n/a	n/a	n/a	27892.7	25086.8	8949.74	13416	3078.96	1368.15	44602.6	46085.5	18481.1	15802.5	9268.39	9265.48	n/a	3.20863	4.1435	3.67606	0.661049	n/a	1.10386	2.07799	1.59093	0.688816	n/a	5.3478	3.42896	4.38838	1.35683	n/a
P53621	Coatomer subunit alpha	COPA	COPA_HUMAN	VQVPNcDEIFYAGTGNLLLR	C6(TMT6-)	SNO, SOH	453	245, S-nitrosylation	245	n/a	1.23108	-0.403458	n/a	-1.55517	0.137542	n/a	n/a	n/a	n/a	n/a	n/a	25215.1	22183	2673.94	8251.55	5754.04	1759.69	23628.2	18688.6	4641.74	2499.7	2096.29	2019.16	n/a	1.06045	1.96449	1.51247	0.639252	n/a	2.28198	0.8872	1.58459	0.98626	n/a	3.71976	1.33755	2.52866	1.68448	n/a
P06733	Alpha-enolase	ENO1	ENOA_HUMAN	ScNcLLLK	C2(TMT6-); C4(Carbamidomethyl)	SNO, SOH	337	119, S-nitrosylation; 389, S-nitrosylation	n/a	-0.305713	-0.666675	n/a	0.517048	0.367505	n/a	31532.6	25062.7	15377.4	15957.2	6575.6	7547.76	52394	47799.6	9971.24	8563.18	5676.33	6824.9	n/a	n/a	n/a	n/a	n/a	n/a	4.87668	1.90313	n/a	3.3899	2.10262	2.08534	1.08339	n/a	1.58436	0.70848	6.3669	1.79148	n/a	4.07919	3.23532	3.01154
Q06210	Isoform 2 of Glutamine--fructose-6-phosphate aminotransferase [isomerizing] 1	GFPT1	GFPT1_HUMAN	cQNALQQVVAR	C1(TMT6-)	SNO, SOH	620	n/a	n/a	0.132598	-0.311385	n/a	0.130082	0.304233	n/a	75997.2	62239.9	21737.1	31493.5	15697.5	14198	89885.5	80063.1	15565.7	16695.8	9423.33	10587.3	n/a	n/a	n/a	n/a	n/a	n/a	2.86025	1.73173	n/a	2.29599	0.797984	2.06554	1.04837	n/a	1.55695	0.719244	5.06002	2.08533	n/a	3.57268	2.10342	2.28117
P06744	Glucose-6-phosphate isomerase	GPI	G6PI_HUMAN	MIPcDFLIPVQTQHPIR	C4(TMT6-)	SNO, SOH	401	n/a	n/a	n/a	-0.0436427	0.505181	n/a	0.313518	0.467921	n/a	n/a	n/a	n/a	n/a	n/a	44286.9	35242.5	13160	15182.4	6484.29	6550.7	40354.8	42364.4	11695.1	15692.7	6497.04	10443.5	n/a	2.97152	2.89806	2.93479	0.0519426	n/a	1.46415	1.60998	1.53707	0.103114	n/a	4.30798	3.70421	4.00609	0.426928	n/a
O00410	Importin-5	IPO5	IPO5_HUMAN	VcDIAAELAR	C2(TMT6-)	SNO, SOH	110	n/a	n/a	0.369847	-0.135643	n/a	0.346638	-0.218768	n/a	57993.2	39481.2	20107.1	28545.1	6717.24	5868.39	54009.8	43344.7	19629.1	21427.1	10089.3	7107.63	n/a	n/a	n/a	n/a	n/a	n/a	3.46715	3.63436	n/a	3.55076	0.118238	1.15828	1.86805	n/a	1.51317	0.501883	7.23004	4.94343	n/a	6.08674	1.61688	1.48637
P02787	Serotransferrin	TF	TRFE_HUMAN	DcHLAQVPSHTVVAR	C2(TMT6-)	SNO, SOH	260	S-nitrosylation	n/a	0.0400635	-0.363586	0.28672	0.0332529	0.000500109	-0.399918	42426.6	38716.1	10835.6	16405.9	6264.18	5903.3	62703	59189.6	19213.3	21064.1	8298.16	8004.71	78893.4	83636.4	18575.8	21633.5	13695.5	12181.9	2.55397	3.06418	2.35454	2.65756	0.365986	1.47648	1.32341	1.73596	1.51195	0.208549	4.23749	3.55874	2.58661	3.46095	0.829774	1.52477
Q15233	Non-POU domain-containing octamer-binding protein	NONO	NONO_HUMAN	FAcHSASLTVR	C3(TMT6-)	SNO, SOH	145	n/a	145	-0.253871	-0.385634	0.144146	0.574451	0.610894	0.226352	61909.1	55845.9	13876.3	16940.3	7140.79	9680.03	89686.6	78261	19646.4	19608.6	12704.4	17295.2	51626.2	55550.4	16123.7	17265.8	10017	13959.3	2.2414	2.19056	3.12316	2.51837	0.524377	1.15343	1.41653	1.9403	1.50342	0.400564	3.0334	2.50553	3.10813	2.88236	0.328469	1.73335
P35222	Catenin beta-1	CTNNB1	CTNB1_HUMAN	NLALcPANHAPLR	C5(TMT6-)	SNO, SOH	520	213, S-nitrosylation	n/a	-0.123818	0.268115	-0.475881	1.02421	0.150848	0.613667	65875.7	56025.1	18279.5	23024	9183.59	16030.8	58072.8	49198.2	16728.9	25502.7	9726.83	9345.73	37546	37574.7	22136.5	14345	5388.43	9134.69	2.77484	2.88068	5.89584	3.85045	1.77215	1.39408	1.67494	1.43515	1.50139	0.151693	4.10958	5.18367	3.81772	4.37033	0.719335	2.86136
P08133	Annexin A6	ANXA6	ANXA6_HUMAN	cLIEILASR	C1(TMT6-)	SNO, SOH	114	H2O2-sensitive	114	n/a	-0.301136	0.0695185	n/a	-0.125709	-0.417222	n/a	n/a	n/a	n/a	n/a	n/a	282131	251484	48874.2	52834.9	37320.6	31147.4	42337.7	51792.3	8788.75	10160.3	6978.86	7077.73	n/a	1.73233	2.07587	1.9041	0.24292	n/a	1.32281	1.64838	1.48559	0.230211	n/a	2.10093	1.96173	2.03133	0.0984257	n/a
P46779	Isoform 4 of 60S ribosomal protein L28	RPL28	RL28_HUMAN	NcSSFLIK	C2(TMT6-)	SNO, SOH	13	n/a	n/a	-0.189854	-0.153256	-0.872378	0.451378	0.0443899	0.0567432	53697.3	45011.7	11188.7	13268.9	9392.37	10864.1	86829	71840.5	13111	14576	13175.3	11483.7	47996.1	50714.3	12277.5	6381.69	5513.5	6708.13	2.08366	1.50998	2.55802	2.05055	0.524806	1.74913	1.51738	1.14874	1.47175	0.302786	2.94788	2.02893	1.25836	2.07839	0.845843	2.41361
P42696	RNA-binding protein 34	RBM34	RBM34_HUMAN	TVFVGNLPVTcNK	C11(TMT6-)	SNO, SOH	196	n/a	n/a	-0.0415125	n/a	0.169727	-1.3289	n/a	-0.114506	48304.7	42701.3	17045.9	23627.1	8385.2	2977.79	n/a	n/a	n/a	n/a	n/a	n/a	73039.7	76255.9	18466.1	19529.7	8804.06	9399.31	3.52884	n/a	2.52823	3.02853	0.707541	1.7359	n/a	1.20538	1.47064	0.375133	5.5331	n/a	2.56107	4.04709	2.10154	0.697354
Q92688	Isoform 2 of Acidic leucine-rich nuclear phosphoprotein 32 family member B	ANP32B	AN32B_HUMAN	ELVLDNcK	C7(TMT6-)	SNO, SOH	27	n/a	n/a	-0.651762	-0.209685	n/a	0.216342	-1.05545	n/a	51400.3	50939.4	11186.4	11387.1	7577.25	8804.24	61250.9	77022.8	9052.68	14709.4	8895.6	5498.14	n/a	n/a	n/a	n/a	n/a	n/a	2.17633	1.47797	n/a	1.82715	0.493818	1.47417	1.45232	n/a	1.46324	0.0154469	2.23542	1.90975	n/a	2.07258	0.230282	1.72838
P55157	Microsomal triglyceride transfer protein large subunit	MTTP	MTP_HUMAN	GcPSLSELWR	C2(TMT6-)	SNO, SOH	301	n/a	n/a	n/a	-0.132697	0.524496	n/a	0.0277266	0.33429	n/a	n/a	n/a	n/a	n/a	n/a	87492.7	66308.2	20445.3	21119.2	15207.2	12001.9	81342.2	82619.5	11702.2	15397	9443.08	13386.9	n/a	2.33681	1.43864	1.88772	0.635101	n/a	1.73812	1.16091	1.44951	0.408148	n/a	3.185	1.8636	2.5243	0.934368	n/a
P13010	X-ray repair cross-complementing protein 5	XRCC5	XRCC5_HUMAN	HSIHWPcR	C7(TMT6-)	SNO, SOH	249	n/a	235;249;296;339;346; 463	n/a	-0.11605	0.197223	n/a	-0.295364	-0.0905651	n/a	n/a	n/a	n/a	n/a	n/a	188401	178968	28281.7	37042	39305	31080.1	154924	157437	17659.5	18528.9	12119.2	12804.7	n/a	1.50114	1.13988	1.32051	0.255449	n/a	2.08624	0.78227	1.43426	0.922047	n/a	2.06976	1.17691	1.62333	0.631338	n/a
Q15067	Peroxisomal acyl-coenzyme A oxidase 1	ACOX1	ACOX1_HUMAN	AFTSWTANTGIEAcR	C14(TMT6-)	SNO, SOH	392	n/a	n/a	-0.428176	-0.42028	-0.205198	-0.173812	-0.177485	0.671604	108222	108387	27822.2	33418.9	32303.7	28943.9	100531	93213.5	15477.9	16025.3	8890.99	7446.58	137697	165182	18226.8	17080.1	5937.38	12559.5	2.57084	1.53961	1.32369	1.81138	0.666515	2.98494	0.884404	0.431191	1.43351	1.36255	3.0833	1.7192	1.03402	1.9455	1.04321	2.67042
P07602	Prosaposin	PSAP	SAP_HUMAN	HcLQTVWNKPTVK	C2(TMT6-)	SNO, SOH	48	n/a	n/a	n/a	-0.459165	-0.00152749	n/a	-0.214687	0.149323	n/a	n/a	n/a	n/a	n/a	n/a	71015.7	71886	16821	18507.7	10872.7	9688.46	63034.6	59926	12509.4	10698.6	8410.3	9816.72	n/a	2.36863	1.98453	2.17658	0.271601	n/a	1.53103	1.33424	1.43263	0.139151	n/a	2.57459	1.7853	2.17994	0.558111	n/a
Q9BSE5	Agmatinase, mitochondrial	AGMAT	SPEB_HUMAN	VVLAEDcWmK	C7(TMT6-); M9(Oxidation)	SNO, SOH	250	n/a	n/a	-0.287737	n/a	0.186953	-0.191655	n/a	-0.656568	101422	93439.8	23200.7	28256.5	21831.8	17773.1	n/a	n/a	n/a	n/a	n/a	n/a	43244	52936.7	7826.76	9822.1	3043.42	2616.46	2.28755	n/a	1.8099	2.04873	0.337749	2.15258	n/a	0.703778	1.42818	1.02446	3.02404	n/a	1.85544	2.43974	0.826322	1.90209
O95373	Importin-7	IPO7	IPO7_HUMAN	TMGFcYQILTEPNADPR	C5(TMT6-)	SNO, SOH	412	n/a	n/a	n/a	-0.323838	-0.288974	n/a	-1.23422	-0.492803	n/a	n/a	n/a	n/a	n/a	n/a	36618.8	32729.9	8090.26	8632.78	6966.75	2703.89	33357.2	37960.2	10063.5	8441.36	3005.46	2690.73	n/a	2.20932	3.01689	2.61311	0.571042	n/a	1.90251	0.900992	1.40175	0.708177	n/a	2.63758	2.22374	2.43066	0.292632	n/a
P07339	Cathepsin D	CTSD	CATD_HUMAN	AIGAVPLIQGEYMIPcEK	C16(TMT6-)	SNO, SOH	326	n/a	n/a	n/a	0.154604	0.0394909	n/a	0.251785	-0.0616849	n/a	n/a	n/a	n/a	n/a	n/a	49995.8	42515.2	8556.63	12102.8	6902.07	7139.04	51179.4	63268.8	12071.8	13812.3	7130.08	9349.47	n/a	1.71147	2.35872	2.03509	0.457674	n/a	1.38053	1.39315	1.38684	0.00892676	n/a	2.8467	2.18312	2.51491	0.469225	n/a
P00441	Superoxide dismutase [Cu-Zn]	SOD1	SODC_HUMAN	LAcGVIGIAQ	C3(TMT6-)	SNO, SOH	147	58, intramolecular disulfide; 112, S-glutathionylation & sulfinic acid; 147, intramolecular disulfide	7	-0.481369	-0.381758	-0.0503097	-1.11359	-0.60657	-0.139982	55573.8	63162.2	14593.1	19171.8	6145.69	3257.61	85311.5	99425.3	14587.2	19497.2	12584.7	9839.93	90206.3	90136.2	25827.3	22444.5	14211.7	14267.1	2.6259	1.70987	2.86313	2.39963	0.609014	1.10586	1.47515	1.57546	1.38549	0.247306	3.03532	1.96099	2.49006	2.49546	0.537184	0.515752
P78371	T-complex protein 1 subunit beta	CCT2	TCPB_HUMAN	TVYGGGcSEmLMAHAVTQLANR	C7(TMT6-); M10(Oxidation)	SNO, SOH	412	S-nitrosylation; S-glutathionylation	n/a	n/a	-0.211612	-0.496378	n/a	-1.74813	-1.41077	n/a	n/a	n/a	n/a	n/a	n/a	52303.2	45594.7	11149.3	12542	7293.4	1933.44	42884.9	51453.5	14173	10855.8	5869.37	2932.15	n/a	2.13167	3.30489	2.71828	0.82959	n/a	1.39445	1.36863	1.38154	0.0182509	n/a	2.75075	2.10982	2.43029	0.453208	n/a
P50991	T-complex protein 1 subunit delta	CCT4	TCPD_HUMAN	TGcNVLLIQK	C3(TMT6-)	SNO, SOH	295	n/a	295; 379; 410	n/a	0.424591	0.296981	n/a	0.559531	0.265898	n/a	n/a	n/a	n/a	n/a	n/a	127529	95776.7	15379.5	23165.4	8128.44	9190.7	88963.8	87020.1	30413.1	32914	18876.6	24577.7	n/a	1.20596	3.4186	2.31228	1.56457	n/a	0.637378	2.12183	1.3796	1.04966	n/a	2.41868	3.78235	3.10051	0.964255	n/a
Q9H0W9	Ester hydrolase C11orf54	C11orf54	CK054_HUMAN	TGPLNFVTcMR	C9(TMT6-)	SNO, SOH	187	n/a	n/a	-0.370015	-0.56373	-0.0748126	0.223808	0.086302	-0.774377	77850.6	91066.4	11661.6	17033.4	2442.45	3367.13	95317.6	95150.9	19826.2	20008.4	9831.74	10644	128028	149822	32602.8	32622.5	35613	26973.4	1.49795	2.08001	2.54653	2.0415	0.525349	0.313735	1.03147	2.78165	1.37562	1.26944	1.87044	2.1028	2.17741	2.05022	0.160098	0.369745
P07814	Bifunctional glutamate/proline--tRNA ligase	EPRS	SYEP_HUMAN	HEELMLGDPcLK	C10(TMT6-)	SNO, SOH	655	n/a	92; 105; 856	-0.0706773	-0.279622	-0.0363282	-0.446865	-0.509448	0.388401	61850.9	50253.3	12784.4	15960.9	9653.61	5807.04	70503.5	66650.5	15502.8	18041	11032.8	7484.71	74835.1	75611.6	18410	16334.8	7331.08	10733.5	2.06697	2.19887	2.46008	2.24197	0.200064	1.56079	1.56486	0.979632	1.36843	0.336712	3.17609	2.70681	2.16036	2.68109	0.508353	1.15555
P21266	Glutathione S-transferase Mu 3	GSTM3	GSTM3_HUMAN	IAAYLQSDQFcK	C11(TMT6-)	SNO, SOH	208	n/a	39; 208	-0.379957	-0.652443	-0.0396653	-0.201393	0.223301	0.418754	53776.7	66439.7	15653.6	23982.9	9357.11	10146.5	48515.7	62042	12695.6	15434.2	6248.75	9529.56	52923	60248.6	16401.3	16358.9	5354.65	9021.09	2.91085	2.61681	3.09909	2.87558	0.243069	1.73999	1.28799	1.01178	1.34659	0.367626	3.60973	2.48771	2.71523	2.93756	0.593132	1.52717
P09651	Isoform 2 of Heterogeneous nuclear ribonucleoprotein A1	HNRNPA1	ROA1_HUMAN	YHTVNGHNcEVR	C9(TMT6-)	SNO	175	n/a	43	0.653955	-0.138377	n/a	0	-0.207388	n/a	5674.89	3338.26	269.472	402.504	0	0	13220.3	8974	2809.84	2589.42	3455.73	2075.44	n/a	n/a	n/a	n/a	n/a	n/a	0.47485	2.1254	n/a	1.30012	1.16711	0	2.61395	n/a	1.30698	1.84834	1.20573	2.88547	n/a	2.0456	1.18776	0
P62244	40S ribosomal protein S15a	RPS15A	RS15A_HUMAN	cGVISPR	C1(TMT6-)	SNO, SOH	72	n/a	n/a	0.914379	0.440057	0.322034	0.301801	0.50485	0.279656	83764	66880.4	6638.35	16120.9	7583.02	7531.84	92868.2	70810.5	29920.9	46249.6	23207.4	25650.1	183973	206397	38515.9	48645.5	8975.49	13531.9	0.792506	3.22186	2.09356	2.03598	1.2157	0.905284	2.49896	0.487869	1.29737	1.06133	2.41041	6.53145	2.35689	3.76625	2.39488	1.12617
Q9Y285	Phenylalanine--tRNA ligase alpha subunit	FARSA	SYFA_HUMAN	VNLQMVYDSPLcR	C12(TMT6-)	SNO, SOH	486	n/a	n/a	-0.736631	n/a	-0.504602	-0.18538	n/a	-0.367196	51452.2	50278.5	17998.5	17033.4	6968.32	6043.22	n/a	n/a	n/a	n/a	n/a	n/a	49799.8	54343.1	11850.4	8208.49	5981.35	5602.05	3.49811	n/a	2.37961	2.93886	0.790893	1.35433	n/a	1.20108	1.27771	0.108364	3.3878	n/a	1.51049	2.44915	1.32746	1.20195
P61586	Transforming protein RhoA	RHOA	RHOA_HUMAN	IGAFGYMEcSAK	C9(TMT6-)	SNO, SOH	157	16, intramolecular disulfide; 20, intramolecular disulfide	n/a	-0.539318	-0.355143	0.374209	-0.0184078	-0.134333	0.336882	31926.9	33488.2	8322.03	9692.74	2855.98	2984.8	62969.1	57855.7	21439.5	23012.1	14402.1	12315.8	38130.1	32287.1	6845.34	6765.78	2346.07	2777.68	2.60659	3.40476	1.79526	2.6022	0.804759	0.894538	2.28717	0.615281	1.26566	0.895605	2.89437	3.9775	2.09551	2.98913	0.944568	0.8913
Q53GS9	U4/U6.U5 tri-snRNP-associated protein 2	USP39	SNUT2_HUMAN	HcPYLDTINR	C2(TMT6-)	SNO, SOH	105	n/a	n/a	n/a	-0.367344	0.0156807	n/a	-0.201603	-0.228468	n/a	n/a	n/a	n/a	n/a	n/a	110668	100394	16922.3	17782.7	12608.5	10160.6	88709.4	93547.1	16520.2	15860.3	12332.2	12288.3	n/a	1.5291	1.86229	1.6957	0.235598	n/a	1.13931	1.39018	1.26474	0.177391	n/a	1.77128	1.69543	1.73336	0.0536335	n/a
Q5JTH9	RRP12-like protein	RRP12	RRP12_HUMAN	cLLHIVR	C1(TMT6-)	SNO, SOH	839	n/a	317	n/a	-0.281774	-0.121474	n/a	0.305784	0.507965	n/a	n/a	n/a	n/a	n/a	n/a	60975.7	46388.1	18444.8	17247.7	8530.57	8194.71	54810.7	51325.1	17884	13863.6	6194.59	9131.83	n/a	3.02493	3.26287	3.1439	0.168245	n/a	1.39901	1.13018	1.26459	0.190092	n/a	3.71814	2.70113	3.20963	0.719136	n/a
P63000	Ras-related C3 botulinum toxin substrate 1	RAC1	RAC1_HUMAN	HHcPNTPIILVGTK	C3(TMT6-)	SNO, SOH	105	n/a	178	n/a	0.245641	-0.538747	n/a	0.821974	-0.231137	n/a	n/a	n/a	n/a	n/a	n/a	71696.1	58592.9	18019.8	26090.2	6642.06	9802.73	62986	71712.8	27855.1	19660.3	9940.32	10674.4	n/a	2.51336	4.42242	3.46789	1.34991	n/a	0.926419	1.57818	1.2523	0.460863	n/a	4.45279	2.74154	3.59716	1.21004	n/a
Q9HC35	Echinoderm microtubule-associated protein-like 4	EML4	EMAL4_HUMAN	VHLFQYPcSK	C8(TMT6-)	SNO, SOH	820	n/a	n/a	0	-0.344433	0.331921	0	0.0787741	-0.162673	15483	8313.4	0	2973.33	0	0	197276	156635	27763.8	25944.4	23213.6	19885.1	35046.1	36544.6	9028.84	10672	8995.96	9277.47	0	1.40736	2.57628	1.32788	1.28998	0	1.17671	2.5669	1.24787	1.28493	3.57655	1.65635	2.92028	2.71773	0.975992	0
P55735	Isoform 2 of Protein SEC13 homolog	SEC13 -	SEC13_HUMAN	VFIWTcDDASSNTWSPK	C6(TMT6-)	SNO, SOH	245	n/a	n/a	n/a	-0.485353	-0.46249	n/a	0.279113	-0.480005	n/a	n/a	n/a	n/a	n/a	n/a	52673.9	50524.1	8803.27	9013.07	5982.54	7113.2	58648.8	77667	14254.9	12337.6	7960.02	8366.88	n/a	1.67128	2.43055	2.05091	0.53689	n/a	1.13577	1.35723	1.2465	0.1566	n/a	1.78392	1.58853	1.68622	0.138161	n/a
P78371	T-complex protein 1 subunit beta	CCT2	TCPB_HUMAN	TVYGGGcSEMLmAHAVTQLANR	C7(TMT6-); M12(Oxidation)	SNO, SOH	412	S-nitrosylation; S-glutathionylation	n/a	n/a	-0.759623	-0.472208	n/a	-1.02019	-0.0540107	n/a	n/a	n/a	n/a	n/a	n/a	41058.2	33032.7	11242.5	7983.07	6865.25	2781.94	30101.5	34919	12478.3	9397.15	2461.33	3044.76	n/a	2.73818	4.14543	3.44181	0.995074	n/a	1.67208	0.817677	1.24488	0.604152	n/a	2.41671	2.69113	2.55392	0.194037	n/a
O75874	Isocitrate dehydrogenase [NADP] cytoplasmic	IDH1	IDHC_HUMAN	DLAAcIK	C5(TMT6-)	SNO, SOH	379	n/a	n/a	0.281021	-0.469345	0.231676	0	0.0589081	-0.00199437	11065.9	8558.57	1737.83	2635.43	0	0	131325	110960	24710.3	22534.2	21990.4	19771.6	76543	86894	19520.2	23432.7	15758.5	19777.4	1.57044	1.88161	2.55022	2.00076	0.50064	0	1.6745	2.05878	1.24443	1.0947	3.07929	2.03084	2.6967	2.60228	0.530566	0
Q9Y5M8	Signal recognition particle receptor subunit beta	SRPRB	SRPRB_HUMAN	AVLLVGLcDSGK	C8(TMT6-)	SNO, SOH	73	n/a	n/a	-0.0659052	n/a	0.00447458	-0.0882492	n/a	-0.329925	30211	26244.1	11887.5	15920.2	1545.7	1274.65	n/a	n/a	n/a	n/a	n/a	n/a	56685.3	66123.4	18437.8	19429.2	11128	11432.8	3.93482	n/a	3.25266	3.59374	0.482356	0.511635	n/a	1.96312	1.23738	1.02635	6.06622	n/a	2.93832	4.50227	2.21176	0.485692
P41252	Isoleucine--tRNA ligase, cytoplasmic	IARS	SYIC_HUMAN	NNDLcYWVPELVR	C5(TMT6-)	SNO, SOH	433	n/a	n/a	n/a	-0.263171	-0.311014	n/a	-0.301155	0.16116	n/a	n/a	n/a	n/a	n/a	n/a	44324.7	42245.7	11095.6	13167.3	6580.09	5199.57	63081.6	68123.5	18155.5	14232.9	6183.41	8266.17	n/a	2.50326	2.8781	2.69068	0.265055	n/a	1.48452	0.980224	1.23237	0.356591	n/a	3.11685	2.08927	2.60306	0.726607	n/a
Q3SXM5	Inactive hydroxysteroid dehydrogenase-like protein 1	HSDL1	HSDL1_HUMAN	cSWLVPSPK	C1(TMT6-)	SNO, SOH	265	n/a	n/a	-0.411423	n/a	0.0191119	-0.473463	n/a	-0.354007	65201.7	67061.6	15804.7	19723.5	8900.25	6653.61	n/a	n/a	n/a	n/a	n/a	n/a	47995.4	59698.1	14571.5	16539.9	5276.36	5684.55	2.42397	n/a	3.03603	2.73	0.432788	1.36503	n/a	1.09935	1.23219	0.187869	2.9411	n/a	2.77059	2.85585	0.120573	0.992163
P08865	40S ribosomal protein SA	RPSA	RSSA_HUMAN	YVDIAIPcNNK	C8(TMT6-)	SNO, SOH	163	n/a	n/a	0.836564	-0.140458	0.137754	0	-0.135112	0.0731946	11732.8	8586.4	991.632	2091.35	1406.74	0	89971.9	69333.7	23008.7	24037	15662	11227.1	139418	141749	34965.9	35223	26230.5	31060.5	0.845183	2.55732	2.50799	1.97016	0.974574	1.19899	1.74076	1.88142	1.60706	0.360329	2.43565	3.46685	2.48489	2.7958	0.581673	0
Q00266	S-adenosylmethionine synthase isoform type-1	MAT1A	METK1_HUMAN	TAcYGHFGR	C3(TMT6-)	SNO, SOH	376	n/a	n/a	n/a	0.0669138	0.384134	n/a	0.591363	-0.862135	n/a	n/a	n/a	n/a	n/a	n/a	76821.6	64141.7	14657.5	19155.5	7581.29	9742.58	90978.5	90873.5	13571.9	15932.7	12853.1	7818.92	n/a	1.908	1.49178	1.69989	0.294314	n/a	0.986869	1.41276	1.19982	0.301154	n/a	2.98644	1.75328	2.36986	0.871971	n/a
P49411	Elongation factor Tu, mitochondrial	TUFM	EFTU_HUMAN	GEETPVIVGSALcALEGR	C13(TMT6-)	SNO, SOH	222	S-nitrosylation	290	n/a	-0.364622	-0.125905	n/a	0.374752	-0.122558	n/a	n/a	n/a	n/a	n/a	n/a	53303.7	45093.6	13406	13162.1	8248.9	9243.17	58423.6	66792.7	12291.1	11597	4962.18	5768.83	n/a	2.51502	2.10379	2.30941	0.290779	n/a	1.54753	0.849345	1.19844	0.49369	n/a	2.91885	1.73626	2.32755	0.836214	n/a
O00487	26S proteasome non-ATPase regulatory subunit 14	PSMD14	PSDE_HUMAN	SWMEGLTLQDYSEHcK	C15(TMT6-)	SNO, SOH	226	n/a	n/a	n/a	-0.113665	-0.0916333	n/a	0.259802	-1.08194	n/a	n/a	n/a	n/a	n/a	n/a	47497.3	39830.6	11956.2	13847	5509.45	5650.94	43238.1	50457.6	10888	10738.3	5298.66	3233.68	n/a	2.51723	2.51814	2.51769	0.000646294	n/a	1.15995	1.22546	1.19271	0.0463227	n/a	3.47647	2.12818	2.80233	0.953384	n/a
P09525	Annexin A4	ANXA4	ANXA4_HUMAN	GAGTDEGcLIEILASR	C8(TMT6-)	SNO, SOH	108	n/a	n/a	-0.615944	-0.118027	-0.203767	-0.50267	-1.0169	-0.296072	13628.9	12188.3	2925.52	2754.87	1796.07	1144.07	42797.6	36616	7156.8	8430.87	7049.67	3044.79	46273.6	53465.3	10073	9100.62	2813.54	2931.12	2.14656	1.67224	2.17684	1.99855	0.282992	1.31784	1.64721	0.608022	1.19102	0.531074	2.26026	2.30251	1.70216	2.08831	0.335085	0.938663
P55072	Transitional endoplasmic reticulum ATPase	VCP	TERA_HUMAN	GVLFYGPPGcGK	C10(TMT6-)	SNO, SOH	522	n/a	105; 535; 572	-0.346322	0.449439	-0.465267	-0.306351	-0.396375	-0.428265	104001	90348.4	21184.2	23360.2	7575.82	5371.05	96194.6	78601.3	15035.7	25068.6	10364	6572.67	65007.9	81028	21450.2	17440.4	11371	11660.4	2.03693	1.56305	3.29964	2.29987	0.897658	0.72844	1.0774	1.74917	1.185	0.518803	2.58557	3.18934	2.15239	2.64243	0.520808	0.594483
O00571	ATP-dependent RNA helicase DDX3X	DDX3X	DDX3X_HUMAN	VRPcVVYGGADIGQQIR	C4(TMT6-)	SNO, SOH	298	n/a	n/a	n/a	-0.132785	0.296651	n/a	0.553211	0.345966	n/a	n/a	n/a	n/a	n/a	n/a	63287.7	50650.5	12039.5	13132.1	7647.6	9174.42	56570.4	57253.9	12462.4	13951.8	6455.34	9192.83	n/a	1.90235	2.20298	2.05267	0.21258	n/a	1.20839	1.14112	1.17475	0.0475677	n/a	2.59269	2.43683	2.51476	0.11021	n/a
P62280	40S ribosomal protein S11	RPS11	RS11_HUMAN	KcPFTGNVSIR	C2(TMT6-)	SNO, SOH	60	n/a	79; 131	0.367358	-0.504189	0.0203517	0.361809	0.299797	0.435339	73292.1	57724.4	13177.5	21605	8253.72	8430.12	86610.9	80835.5	14915.7	14666.6	8658.29	10161.7	130599	121903	29321.3	24997.4	18246.6	25496	1.79794	1.72216	2.24514	1.92175	0.282617	1.12614	0.999677	1.39714	1.17432	0.203066	3.74278	1.81438	2.05061	2.53592	1.05182	1.46041
Q15070	Mitochondrial inner membrane protein OXA1L	OXA1L	OXA1L_HUMAN	cLIFPLIVTGQR	C1(TMT6-)	SNO, SOH	153	n/a	n/a	n/a	0.716985	0.0604594	n/a	0.39542	1.05263	n/a	n/a	n/a	n/a	n/a	n/a	36737.6	21564.7	7008.55	10104.8	6427.39	5069.39	45290	47795	7855.37	7785.03	2668.39	6466.52	n/a	1.90773	1.73446	1.8211	0.122519	n/a	1.74954	0.589179	1.16936	0.820498	n/a	4.68579	1.62884	3.15732	2.16159	n/a
Q9UK22	F-box only protein 2	FBXO2	FBX2_HUMAN	SDAGcLYELTVK	C5(TMT6-)	SNO, SOH	215	n/a	n/a	-0.610935	n/a	-0.294176	-1.20446	n/a	-0.364455	32731.1	32382.7	7515.74	7856.82	3079.73	1334.3	n/a	n/a	n/a	n/a	n/a	n/a	37001.6	45350	9794.52	8816.52	5090.29	5364.83	2.29621	n/a	2.64706	2.47163	0.248089	0.940918	n/a	1.3757	1.15831	0.307435	2.42624	n/a	1.94411	2.18517	0.34092	0.412041
P21912	Succinate dehydrogenase ubiquinone iron-sulfur subunit, mitochondrial	SDHB	SDHB_HUMAN	cGPMVLDALIK	C1(TMT6-)	SNO, SOH	68	n/a	n/a	n/a	-0.209706	-0.119145	n/a	-0.0737174	-0.590244	n/a	n/a	n/a	n/a	n/a	n/a	40753.5	32954.8	7833.03	8184.44	6657.13	5225.24	42728.6	44781.1	10151.3	8821.52	2891.69	2228.51	n/a	1.92205	2.37576	2.14891	0.320818	n/a	1.63351	0.676758	1.15514	0.676529	n/a	2.48353	1.96992	2.22673	0.363178	n/a
P15880	40S ribosomal protein S2	RPS2	RS2_HUMAN	cGSVLVR	C1(TMT6-)	SNO, SOH	188	n/a	229	-0.112041	0.661337	0.535915	0.458055	0.494155	0.406727	38909.5	34023.4	14788.1	19308.1	5401.91	6548.23	287063	222421	23463.3	42963.9	30483.1	33983.6	158907	164251	22087.3	29808.9	15848.1	24040.6	3.80063	0.817357	1.38995	2.00264	1.5832	1.38832	1.0619	0.997318	1.14918	0.209608	5.67493	1.93164	1.81484	3.14047	2.19568	1.92462
O75874	Isocitrate dehydrogenase [NADP] cytoplasmic	IDH1	IDHC_HUMAN	EAIIcK	C5(TMT6-)	SNO, SOH	114	n/a	n/a	-0.251076	-0.0594253	0.45407	-1.2907	0.754083	0.345508	23665.3	24545.3	6367.91	8955.82	2390.59	1022.79	68148.9	63864.6	11712.9	15740.2	5282.49	8529	37323.3	40737.7	10415.9	14025.3	6090.78	9351.15	2.69082	1.71872	2.79071	2.40009	0.592186	1.01017	0.77514	1.63189	1.13907	0.442683	3.64869	2.46462	3.44284	3.18538	0.632628	0.416696
O43175	D-3-phosphoglycerate dehydrogenase	PHGDH	SERA_HUMAN	ALQSGQcAGAALDVFTEEPPR	C7(TMT6-)	SNO, SOH	254	S-nitrosylation	281;369	n/a	-0.0053286	-0.00402911	n/a	-0.631265	-0.341555	n/a	n/a	n/a	n/a	n/a	n/a	33288.8	30529.9	5171.35	7060.88	5669.74	3429.39	40064.6	38308.1	7810.84	6706.99	2241.99	1872.89	n/a	1.55348	1.94956	1.75152	0.280073	n/a	1.7032	0.559593	1.1314	0.80865	n/a	2.31278	1.7508	2.03179	0.397376	n/a
P20073	Isoform 2 of Annexin A7	ANXA7 -	ANXA7_HUMAN	cYQSEFGR	C1(TMT6-)	SNO, SOH	298	n/a	298	n/a	-0.222124	-0.584718	n/a	0.484097	0.034441	n/a	n/a	n/a	n/a	n/a	n/a	80682.1	65060.6	19775.9	20428.9	9259.1	10668.3	45630	55038.4	18950.2	13725.4	5053.94	6911.64	n/a	2.45109	4.15303	3.30206	1.20345	n/a	1.1476	1.10759	1.1276	0.0282928	n/a	3.13998	2.49379	2.81688	0.456921	n/a
Q9Y224	UPF0568 protein C14orf166	C14orf166	CN166_HUMAN	LTALDYHNPAGFNcK	C14(TMT6-)	SNO, SOH	19	n/a	n/a	-0.0746443	0.152266	-0.148167	0.232307	-0.132411	-0.644342	77349.9	69484.9	15868.7	21844.2	7544.07	8034.04	62445.1	52411.8	15500.7	21604.9	8538.94	6679.28	55483.5	45529.3	16122.3	10751.4	5641.03	3278.59	2.05155	2.4823	2.90579	2.47988	0.427126	0.975317	1.36743	1.0167	1.11982	0.215435	3.14373	4.12214	2.36143	3.2091	0.882174	1.15623
P16615	Sarcoplasmic/endoplasmic reticulum calcium ATPase 2	ATP2A2	AT2A2_HUMAN	cLALATHDNPLR	C1(TMT6-)	SNO, SOH	560	674, S-glutathionylation	560	-0.0831271	0.474744	0.157437	0.802423	-0.112461	0.206846	88221.6	82665.2	13554.4	19348	6099.2	10058.7	65924.3	57113.4	10314.4	18555.9	8264.92	6766.02	44665.1	50198.2	10148.5	11455.9	6252.63	8978.78	1.5364	1.56458	2.27214	1.79104	0.416881	0.69135	1.2537	1.39989	1.11498	0.374085	2.34053	3.24895	2.28213	2.62387	0.542122	1.2168
P00439	Phenylalanine-4-hydroxylase	PAH	PH4H_HUMAN	THAcYEYNHIFPLLEK	C4(TMT6-)	SNO, SOH	203	n/a	n/a	n/a	-0.455665	0.0330773	n/a	0.0835764	0.2996	n/a	n/a	n/a	n/a	n/a	n/a	62803.7	47073.2	14588.2	11913.9	8041.88	6524.71	70213.8	63365.1	20936	17409.7	6627.2	8149.18	n/a	2.32282	2.98175	2.65229	0.465935	n/a	1.28048	0.943859	1.11217	0.238026	n/a	2.53093	2.74753	2.63923	0.15316	n/a
O76071	Probable cytosolic iron-sulfur protein assembly protein CIAO1	CIAO1	CIAO1_HUMAN	SVAWAPSGNLLATcSR	C14(TMT6-)	SNO, SOH	123	n/a	n/a	n/a	-0.314267	0.142684	n/a	-0.458038	-0.482685	n/a	n/a	n/a	n/a	n/a	n/a	73048.7	64162.7	12971.5	13692.7	8759.18	5721.46	70589.5	85808.6	13380.1	16170.2	7225.33	6958.47	n/a	1.77573	1.89548	1.83561	0.0846718	n/a	1.19909	1.02357	1.11133	0.12411	n/a	2.13406	1.88445	2.00925	0.176502	n/a
Q92843	Bcl-2-like protein 2	BCL2L2	B2CL2_HUMAN	SIYVGNVDYGATAEELEAHFHGcGSVNR	C23(TMT6-)	SNO, SOH	0	n/a	n/a	n/a	1.31147	0.0872235	n/a	-1.72656	1.81654	n/a	n/a	n/a	n/a	n/a	n/a	33642.1	27444.2	2518.49	7619.59	5942.85	1496.49	33845	32124.4	7274.36	6605.49	1543.18	5711.61	n/a	0.748614	2.14931	1.44896	0.990445	n/a	1.76649	0.455956	1.11122	0.92669	n/a	2.77639	2.05622	2.41631	0.509239	n/a
P53041	Serine/threonine-protein phosphatase 5	PPP5C	PPP5_HUMAN	TEcYGYALGDATR	C3(TMT6-)	SNO, SOH	77	n/a	404	0.0108583	n/a	-0.00611262	0.214793	n/a	0.110237	64192.8	60191	12552.8	19137.7	8578.58	9420.76	n/a	n/a	n/a	n/a	n/a	n/a	106550	122774	21848	22575.7	9289.4	12790.7	1.95549	n/a	2.0505	2.003	0.0671819	1.33638	n/a	0.871838	1.10411	0.328479	3.17949	n/a	1.83879	2.50914	0.948017	1.56514
P01009	Alpha-1-antitrypsin	SERPINA1	A1AT_HUMAN	LGMFNIQHcK	C9(TMT6-)	SNO, SOH	250	n/a	256	-0.51993	n/a	-0.824791	-1.3447	n/a	0.65924	45854.3	56415.2	20448.9	28314.3	6812.29	3330.28	n/a	n/a	n/a	n/a	n/a	n/a	70892.2	93858.7	43980.9	29605	5054.87	11700.5	4.45955	n/a	6.2039	5.33173	1.23344	1.48564	n/a	0.713036	1.09934	0.546314	5.01891	n/a	3.15422	4.08656	1.31854	0.590316
Q7LGA3	Heparan sulfate 2-O-sulfotransferase 1	HS2ST1	HS2ST_HUMAN	TASTSFTNIAYDLcAK	C14(TMT6-)	SNO, SOH	97	n/a	n/a	-0.434649	-0.120657	0.106374	0.936727	-0.359386	-0.449609	56973.8	47900	24224.6	24316.8	1930.28	3134.94	69293.8	59848.5	19805.4	23510	12490.6	8590.33	65365.3	69942.8	14965.6	15524.8	7459.01	6469.92	4.25188	2.85817	2.28954	3.1332	1.00967	0.338801	1.80255	1.14113	1.09416	0.733004	5.07658	3.92825	2.21964	3.74149	1.4376	0.654476
P09110	3-ketoacyl-CoA thiolase, peroxisomal	ACAA1	THIK_HUMAN	VNPLGGAVALGHPLGcTGAR	C16(TMT6-)	SNO, SOH	381	S-nitrosylation	n/a	0.135931	n/a	0.149029	0.447767	n/a	-0.263071	26587.3	23974	6685.67	10689.7	2323.86	2884.26	n/a	n/a	n/a	n/a	n/a	n/a	42512.3	41671.4	10675.9	10449.6	5570.84	5037.55	2.51461	n/a	2.51124	2.51292	0.00238485	0.874048	n/a	1.3104	1.09223	0.30855	4.45885	n/a	2.50763	3.48324	1.37972	1.20308
Q12874	Splicing factor 3A subunit 3	SF3A3	SF3A3_HUMAN	YLDLHDcYLK	C7(TMT6-)	SNO, SOH	145	n/a	n/a	n/a	-0.467712	0.333869	n/a	-0.000667545	0.63215	n/a	n/a	n/a	n/a	n/a	n/a	51614.6	47245.2	15010.6	14846.4	6299.75	5887.95	57978.6	51838.5	15663.3	15895.9	5482.79	8411.05	n/a	2.90821	2.70156	2.80489	0.146127	n/a	1.22054	0.945658	1.0831	0.194369	n/a	3.14241	3.06642	3.10442	0.0537322	n/a
Q02543	60S ribosomal protein L18a	RPL18A	RL18A_HUMAN	cHTPPLYR	C1(TMT6-)	SNO, SOH	22	n/a	n/a	-0.0240527	-0.0858018	0.0972278	0.204338	-0.037476	0.435643	64582.3	50717.3	9607.54	11974.2	6184.98	5647.53	161506	132224	23662.1	27276	21837.4	17795	77576.6	88606.8	14037.3	15445.5	7128.22	12190.7	1.48764	1.4651	1.80948	1.5874	0.19265	0.957688	1.35211	0.918862	1.07622	0.239717	2.36097	2.06286	1.74315	2.05566	0.308975	1.11353
P48147	Prolyl endopeptidase	PREP	PPCE_HUMAN	ITVPFLEQcPIR	C9(TMT6-)	SNO	57	n/a	n/a	-0.810028	-0.204277	n/a	0	-1.30197	n/a	2581.78	3028.17	1079.47	1165.36	0	0	31396.6	36622.3	6766.83	10237.3	6732.92	3253.81	n/a	n/a	n/a	n/a	n/a	n/a	4.1811	2.15528	n/a	3.16819	1.43247	0	2.14448	n/a	1.07224	1.51637	3.84841	2.79539	n/a	3.3219	0.744599	0
P11413	Glucose-6-phosphate 1-dehydrogenase	G6PD	G6PD_HUMAN	DNIAcVILTFK	C5(TMT6-)	SNO, SOH	232	n/a	n/a	n/a	-0.682564	-0.399663	n/a	0.787476	-1.15625	n/a	n/a	n/a	n/a	n/a	n/a	23434.6	28676.2	8146.58	9281.09	1263.7	2726.57	11930.5	18537.8	17579.7	18647.2	1909.57	1473.79	n/a	3.4763	14.735	9.10567	7.96112	n/a	0.539245	1.60057	1.06991	0.75047	n/a	3.23651	10.059	6.64774	4.82421	n/a
Q02543	60S ribosomal protein L18a	RPL18A	RL18A_HUMAN	DLTTAGAVTQcYR	C11(TMT6-)	SNO, SOH	109	n/a	n/a	0.135392	-0.410257	0.100335	-1.36013	0.397143	-1.05713	80623.3	57110.6	6778.78	8511.34	7743.29	2156.29	61565	52015.7	8064.36	7661.3	7160.01	8138.08	42961.7	43120.9	5967.77	5782.76	4567.44	2439.04	0.840797	1.30989	1.38909	1.17993	0.296353	0.960428	1.163	1.06314	1.06219	0.101289	1.49033	1.47288	1.34106	1.43476	0.0816117	0.377564
P22090	40S ribosomal protein S4, Y isoform 1	RPS4Y1	RS4Y1_HUMAN	FDTGNLcMVIGGANLGR	C7(TMT6-)	SNO, SOH	181	n/a	n/a	n/a	-0.133168	-0.349682	n/a	-0.795212	1.04959	n/a	n/a	n/a	n/a	n/a	n/a	37921.1	29599.6	8919.59	9486.24	6437.88	2958.15	63150.4	63901.9	15177.9	10854.2	2640.92	6123.8	n/a	2.35214	2.40345	2.3778	0.0362818	n/a	1.6977	0.418196	1.05795	0.904747	n/a	3.20486	1.69857	2.45171	1.0651	n/a
P43897	Elongation factor Ts, mitochondrial	TSFM	EFTS_HUMAN	TGYSFVNcK	C8(TMT6-)	SNO, SOH	64	n/a	71; 240	0.362249	0.32711	-0.389764	0.104435	0.644474	0.213028	121022	92622.7	24434.7	38791.8	15847.2	13158.6	156407	115656	18942.7	26257.6	12095.4	14282.2	59572	55441.4	14163.6	9060.44	6476.96	7734.99	2.01902	1.21111	2.37757	1.86923	0.597478	1.30945	0.77333	1.08725	1.05668	0.269363	4.18815	2.27032	1.63424	2.69757	1.32949	1.42067
P51991	Heterogeneous nuclear ribonucleoprotein A3	HNRNPA3	ROA3_HUMAN	WGTLTDcVVmR	C7(TMT6-); M10(Oxidation)	SNO, SOH	64	n/a	n/a	0.0950586	0.0765829	0.281879	-0.223846	-0.2738	0.0816546	133448	98690.2	17931.9	22857.9	12706.7	8120.37	93608.2	81224.3	15053.8	20582.9	12660	9281.97	186954	189061	26474.4	29313.1	15754.3	18664.4	1.34373	1.60818	1.41609	1.456	0.136664	0.952181	1.35245	0.842681	1.0491	0.268348	2.31612	2.53408	1.55045	2.13355	0.516602	0.822814
P21964	Isoform Soluble of Catechol O-methyltransferase	COMT -	COMT_HUMAN	GTVLLADNVIcPGAPDFLAHVR	C11(TMT6-)	SNO, SOH	223	119, S-glutathionylation; 145, S-glutathionylation; 207, S-glutathionylation; 223, S-glutathionylation; 238, intramolecular disulfide; 241, intramolecular disulfide	n/a	n/a	0.159955	-0.0290226	n/a	-0.154657	-1.05753	n/a	n/a	n/a	n/a	n/a	n/a	43382.4	37505.1	7947.02	11470	3370.76	2674.26	40874.6	43446.5	9688.89	9089.74	5381.43	3042.42	n/a	1.83185	2.37039	2.10112	0.380805	n/a	0.776989	1.31657	1.04678	0.381543	n/a	3.05826	2.09217	2.57522	0.683129	n/a
P40925	Malate dehydrogenase, cytoplasmic	MDH1	MDHC_HUMAN	VIVVGNPANTNcLTASK	C12(TMT6-)	SNO, SOH	137	n/a	n/a	n/a	-0.0882669	-0.581286	n/a	-1.22511	-0.608644	n/a	n/a	n/a	n/a	n/a	n/a	62727.2	56868.9	9055.3	11539.4	6880.28	2725.75	65896.2	81067.8	13475.6	9978.47	6429.77	5742.9	n/a	1.4436	2.04497	1.74428	0.425232	n/a	1.09686	0.975742	1.0363	0.0856422	n/a	2.02912	1.23088	1.63	0.564444	n/a
Q8NCW5	Isoform 2 of NAD(P)H-hydrate epimerase	APOA1BP -	NNRE_HUMAN	RPNKPLFTALVTQcQK	C14(TMT6-)	SNO, SOH	158	n/a	n/a	n/a	-0.666873	-0.399194	n/a	-0.0695528	-0.497658	n/a	n/a	n/a	n/a	n/a	n/a	69838.7	69645.2	12611.5	11837.1	7398.63	7182.32	56387.4	73952.2	13156.8	11783.2	5645.95	5805.83	n/a	1.8058	2.33329	2.06954	0.372992	n/a	1.05939	1.00128	1.03033	0.0410888	n/a	1.69962	1.59335	1.64649	0.0751439	n/a
Q16762	Thiosulfate sulfurtransferase	TST	THTR_HUMAN	HVPGASFFDIEEcR	C13(TMT6-)	SNO, SOH	64	n/a	n/a	-0.616025	0.0761821	0.330231	-0.43555	-0.113123	-0.587665	75254.4	106183	15079.4	22402.6	9095.67	9576.58	173793	191484	14540.6	25237.7	19370.5	20157.8	175446	251562	15068.5	24462.1	13313.9	14062.7	2.00379	0.836663	0.85887	1.23311	0.667523	1.20866	1.11457	0.758859	1.02736	0.237242	2.10981	1.318	0.972411	1.46674	0.583105	0.901895
P48643	T-complex protein 1 subunit epsilon	CCT5	TCPE_HUMAN	MLVIEQcK	C7(TMT6-)	SNO, SOH	371	n/a	181;407	-0.106939	-0.425163	n/a	-0.204351	-0.00182984	n/a	155667	130412	22413.6	28136.9	12670.8	9297.72	100193	82090.7	21578.6	19675.4	12400.8	10366	n/a	n/a	n/a	n/a	n/a	n/a	1.43985	2.15369	n/a	1.79677	0.504764	0.813968	1.23769	n/a	1.02583	0.299614	2.15754	2.39679	n/a	2.27716	0.169176	0.712948
P61758	Prefoldin subunit 3	VBP1	PFD3_HUMAN	FLLADNLYcK	C9(TMT6-)	SNO, SOH	113	n/a	113	-0.403056	-0.341971	-0.555755	-0.37979	-1.57217	0.605368	48500.7	54743.2	12320.5	16971.1	5909.73	5173.54	61871.8	58528.9	10989.1	12255.5	7551.86	2454.24	119655	115561	20649.6	12218.1	7542.83	12269.1	2.54026	1.77611	1.72576	2.01404	0.456414	1.21848	1.22057	0.63038	1.02314	0.340144	3.10013	2.09392	1.05729	2.08378	1.02146	0.945057
P30038	Delta-1-pyrroline-5-carboxylate dehydrogenase, mitochondrial	ALDH4A1	AL4A1_HUMAN	FcYADK	C2(TMT6-)	SNO, SOH	95	n/a	n/a	-0.893614	-0.243433	n/a	-0.123965	-0.635751	n/a	20412.4	17902.4	7699.87	5865.85	1649.26	1339.54	42502	38533.6	11479.6	13137.4	5233.8	3119.77	n/a	n/a	n/a	n/a	n/a	n/a	3.77216	2.70096	n/a	3.23656	0.757453	0.807969	1.23142	n/a	1.0197	0.299428	3.27656	3.40933	n/a	3.34295	0.0938835	0.748245
O43175	D-3-phosphoglycerate dehydrogenase	PHGDH	SERA_HUMAN	NAGNcLSPAVIVGLLK	C5(TMT6-)	SNO, SOH	369	S-nitrosylation	281;369	n/a	0.426947	-0.386973	n/a	-0.127593	-0.623322	n/a	n/a	n/a	n/a	n/a	n/a	32104.5	26844.6	5689.81	9557.5	2530.94	1978.88	85439.6	113174	19020.9	17351.8	10665.9	10153.5	n/a	1.77228	2.22624	1.99926	0.321003	n/a	0.788344	1.24836	1.01835	0.325279	n/a	3.56031	1.53319	2.54675	1.43339	n/a
P13489	Ribonuclease inhibitor	RNH1	RINI_HUMAN	TLWIWEcGITAK	C7(TMT6-)	SNO, SOH	266	n/a	38:248	n/a	0.55761	-0.190495	n/a	0.988437	-1.36075	n/a	n/a	n/a	n/a	n/a	n/a	54853.8	40129.7	7329.21	11792.5	4459.96	6612.94	49973.3	56115.2	12642.9	11203.6	6104.09	2954.64	n/a	1.33614	2.52993	1.93303	0.844142	n/a	0.813062	1.22147	1.01727	0.288788	n/a	2.9386	1.99654	2.46757	0.666138	n/a
P08833	Insulin-like growth factor-binding protein 1	IGFBP1	IBP1_HUMAN	FYLPNcNK	C6(TMT6-)	SNO, SOH	206	n/a	n/a	-0.635052	n/a	0.0632544	0.0710669	n/a	0.148873	81094.5	102882	18315.2	24144.8	7898.48	10623.1	n/a	n/a	n/a	n/a	n/a	n/a	143453	127570	68871.1	57627.9	15212.6	16604.6	2.2585	n/a	4.80097	3.52973	1.7978	0.973984	n/a	1.06046	1.01722	0.0611488	2.34684	n/a	4.51734	3.43209	1.53478	1.03255
P60602	Reactive oxygen species modulator 1	ROMO1	ROMO1_HUMAN	PVAVGPYGQSQPScFDR	C14(TMT6-)	SNO, SOH	15	n/a	n/a	0.0625027	-0.114727	0.458112	-0.204546	-1.61544	0.135532	75532.2	66552.1	9105.77	13520.6	9394.07	7248.96	63696.2	58161.1	8110.8	10220.7	6741.99	2052.42	76650.7	85356.3	9073.67	12500.3	5623.39	7615.26	1.20555	1.27336	1.18377	1.22089	0.0467239	1.24372	1.05846	0.733639	1.01194	0.258202	2.03158	1.7573	1.46449	1.75112	0.283595	1.08921
P13489	Ribonuclease inhibitor	RNH1	RINI_HUMAN	ELcQGLGQPGSVLR	C3(TMT6-)	SNO, SOH	362	n/a	38:248	n/a	0.0327009	-0.266196	n/a	-0.00575256	-0.057077	n/a	n/a	n/a	n/a	n/a	n/a	60753.6	53653.7	14745.6	19905.3	5741.49	5159.13	72452.7	77664.7	24026.8	19286.1	7813.63	8912.67	n/a	2.42712	3.3162	2.87166	0.628673	n/a	0.945045	1.07844	1.01175	0.0943277	n/a	3.70995	2.48325	3.0966	0.867404	n/a
P21333	Isoform 2 of Filamin-A	FLNA	FLNA_HUMAN	THEAEIVEGENHTYcIR	C15(TMT6-)	SNO, SOH	2199	n/a	444; 717; 810; 1260; 2543	0.428891	-0.32847	-0.608907	0.10918	-0.868995	-0.511507	39972	39415.1	5346.98	11454	1767.31	1896.94	49862.6	50841.6	9239.04	11210.5	5952.83	3394.93	52837.5	59832.2	14978.1	10015.3	7349.56	6463.13	1.33768	1.8529	2.83474	2.00844	0.760554	0.442138	1.19385	1.39097	1.00899	0.500703	2.906	2.20499	1.67389	2.26163	0.618003	0.481272
Q08380	Galectin-3-binding protein	LGALS3BP	LG3BP_HUMAN	STSSFPcPAGHFNGFR	C7(TMT6-)	SNO, SOH	561	n/a	n/a	n/a	-0.598535	0.354977	n/a	-0.580739	0.703223	n/a	n/a	n/a	n/a	n/a	n/a	84450.6	96840.1	15537.7	17583.1	11373.5	8908.08	109012	112240	15559.6	18452.1	7094.99	13167	n/a	1.83986	1.42733	1.6336	0.2917	n/a	1.34677	0.650845	0.998806	0.492092	n/a	1.81568	1.64398	1.72983	0.121411	n/a
Q14669	E3 ubiquitin-protein ligase TRIP12	TRIP12	TRIPC_HUMAN	TcPFFFPFDTR	C2(TMT6-)	SNO, SOH	1538	n/a	n/a	n/a	-0.460087	0.211002	n/a	-0.0590189	0.0577426	n/a	n/a	n/a	n/a	n/a	n/a	61944	50787.8	9588.48	8539.69	6613.03	5316.79	66259.8	65046.8	7678.73	7857.71	6157.34	6964.96	n/a	1.54793	1.15888	1.3534	0.275096	n/a	1.06758	0.929272	0.998427	0.0977994	n/a	1.68145	1.20801	1.44473	0.33477	n/a
Q99714	3-hydroxyacyl-CoA dehydrogenase type-2	HSD17B10	HCD2_HUMAN	LGNNcVFAPADVTSEK	C5(TMT6-)	SNO, SOH	58	S-glutathionylation	214	0.0945845	n/a	-0.480123	-1.02652	n/a	-0.917695	51710	43055.9	13431.2	19269.9	4963.75	2047.48	n/a	n/a	n/a	n/a	n/a	n/a	48875.7	54046.2	13631	9731.53	4996.3	3237.69	2.59741	n/a	2.78891	2.69316	0.135408	0.95992	n/a	1.02225	0.991083	0.0440714	4.47555	n/a	1.80059	3.13807	1.89148	0.47554
P78527	DNA-dependent protein kinase catalytic subunit	PRKDC	PRKDC_HUMAN	GYGLFAGPcK	C9(TMT6-)	SNO, SOH	373	n/a	25; 478; 795; 1499; 1507; 2342; 3187; 3347; 4045	n/a	-0.18372	-0.302465	n/a	0.13485	-0.136312	n/a	n/a	n/a	n/a	n/a	n/a	141779	128710	19231.2	22968.5	7970.5	8115.86	79736.1	87288.9	48707.1	38936.6	11295.3	12454.8	n/a	1.35642	6.10853	3.73248	3.36025	n/a	0.562177	1.41659	0.989385	0.604162	n/a	1.78452	4.46066	3.12259	1.89232	n/a
P08238	Heat shock protein HSP 90-beta	HSP90AB1	HS90B_HUMAN	LVSSPccIVTSTYGWTANMER	C6(TMT6-); C7(TMT6-)	SNO, SOH	589; 590	H2O2-sensitive; S-glutathionylation	412	n/a	-0.123624	0.041037	n/a	-0.963577	-0.325605	n/a	n/a	n/a	n/a	n/a	n/a	46289.8	41492.3	6786.58	8343.55	3176.02	1491.27	66803.3	74109.8	10138.6	10421.3	8622.33	8449.93	n/a	1.46611	1.51769	1.4919	0.0364719	n/a	0.686116	1.2907	0.98841	0.427508	n/a	2.01087	1.4062	1.70853	0.427561	n/a
O75439	Mitochondrial-processing peptidase subunit beta	PMPCB	MPPB_HUMAN	TNMLLQLDGSTPIcEDIGR	C14(TMT6-)	SNO, SOH	408	n/a	n/a	0.0318098	-0.200914	-0.250239	-0.159972	-1.3855	-0.707583	25332.9	19235.5	11693	14647.2	2336.46	1602.46	47505.5	37424.7	15928.1	16312.9	6848.08	2109.41	32775.7	39206.3	14969.7	13558.2	1946.24	1578.21	4.61576	3.35291	4.56734	4.17867	0.715539	0.922304	1.44153	0.593807	0.985882	0.427425	7.61468	4.35886	3.45817	5.1439	2.18663	0.833075
P13674	Prolyl 4-hydroxylase subunit alpha-1	P4HA1	P4HA1_HUMAN	HAAcPVLVGNK	C4(TMT6-)	SNO, SOH	503	S-glutathionylation	n/a	-0.349347	-0.386678	-0.284688	0.224118	0.323187	-0.298298	27885.4	31250.9	5215.41	7403.59	2015.2	2662.17	62182.5	60728.4	11179.9	12479.3	8864.7	11064.5	76450.5	80645.9	12206.5	9519.33	6103.21	5796.04	1.8703	1.79791	1.59665	1.75495	0.141789	0.722672	1.42559	0.798323	0.982196	0.385852	2.36908	2.05494	1.18039	1.86814	0.615972	0.851871
Q99832	T-complex protein 1 subunit eta	CCT7	TCPH_HUMAN	YNFFTGcPK	C7(TMT6-)	SNO, SOH	364	n/a	364; 450	-0.38191	-0.222502	-0.0934193	-0.0204089	-0.140063	-0.45979	125028	102375	19038.9	19306.1	9204.17	7498.83	99254.3	87713.4	16302.8	18451.5	10202.6	8358.32	83714.4	97298.6	19638	19266.2	9781.07	9150.62	1.52277	1.64253	2.34584	1.83704	0.444677	0.736168	1.02792	1.16839	0.977492	0.220478	1.88582	2.10361	1.98011	1.98985	0.109221	0.732487
P41252	Isoleucine--tRNA ligase, cytoplasmic	IARS	SYIC_HUMAN	VcMDFNIIR	C2(TMT6-)	SNO, SOH	336	n/a	n/a	-0.0799341	0.0240837	0.0518109	-1.03707	-1.8274	-1.461	34267.3	34410.3	7417.11	11371.4	3104.64	1533.2	53819.5	44769.1	9084.73	11482.4	6477.63	1550.99	84063.5	87243.7	12988.7	12583.5	6869.85	2867.06	2.16449	1.688	1.54511	1.7992	0.324316	0.906005	1.20359	0.817222	0.975604	0.202367	3.30465	2.56481	1.44234	2.43727	0.937682	0.445563
Q9P2E9	Ribosome-binding protein 1	RRBP1	RRBP1_HUMAN	AMEALATAEQAcK	C12(TMT6-)	SNO, SOH	1028	n/a	892; 1323	-0.648747	0.096144	0.0364216	-0.445392	0	0.115772	44371.6	47725.2	19339.2	21410.3	9819.46	7827.44	21600.5	20835.4	1355.68	2088.67	0	1721.47	96097	96789.1	26009.2	24194.7	6727.99	8128.69	4.35847	0.627614	2.70656	2.56421	1.8695	2.213	0	0.700124	0.971043	1.1311	4.48616	1.00246	2.49974	2.66279	1.74756	1.64011
Q9BSE5	Agmatinase, mitochondrial	AGMAT	SPEB_HUMAN	VVLAEDcWMK	C7(TMT6-)	SNO, SOH	250	n/a	n/a	-0.0635863	0.246448	-0.0324016	0.114572	-0.242243	0.124032	52893	53350.3	11516.8	17937.5	6166.74	6795.94	65418.9	67354.5	7404.07	13513.1	6512.91	5791.25	62838.9	64775.9	13599.3	12344.1	4670.75	5808.67	2.17738	1.13179	2.16415	1.82444	0.599887	1.16589	0.99557	0.743289	0.968249	0.21262	3.36222	2.00626	1.90567	2.42472	0.813458	1.27383
P26368	Isoform 2 of Splicing factor U2AF 65 kDa subunit	U2AF2 -	U2AF2_HUMAN	YcDPDSYHR	C2(TMT6-)	SNO, SOH	464	n/a	n/a	n/a	0.136123	0.242972	n/a	0.618993	1.07526	n/a	n/a	n/a	n/a	n/a	n/a	26414.8	20397.1	5150.39	6530.87	2274.04	2754.93	17369.4	20899	4684.61	6007.15	1867.18	5240.6	n/a	1.94981	2.69704	2.32343	0.52837	n/a	0.860895	1.07498	0.967937	0.151381	n/a	3.20186	2.87437	3.03811	0.231572	n/a
P62937	Peptidyl-prolyl cis-trans isomerase A	PPIA	PPIA_HUMAN	ITIADcGQLE	C6(TMT6-)	SNO, SOH	161	52, S-glutathionylation; 62, S-glutathionylation	n/a	-0.182945	-0.0671051	0.163277	0.316538	0.174898	0.0787854	52145.4	48524.2	18363.4	24291.6	2754.07	3220.85	72532.2	67350.9	16880.4	22357.7	7820.92	8374.83	90937.7	93159.3	22926.4	23685.5	11692.6	14004.8	3.52158	2.3273	2.52111	2.78999	0.640937	0.528152	1.07827	1.28578	0.964067	0.391512	5.00609	3.31958	2.54247	3.62271	1.25947	0.663763
Q99643	Isoform 5 of Succinate dehydrogenase cytochrome b560 subunit, mitochondrial	SDHC -	C560_HUMAN	SLcLGPALIHTAK	C3(TMT6-)	SNO, SOH	107	n/a	n/a	n/a	0.198141	0.0308617	n/a	0.284645	0.249418	n/a	n/a	n/a	n/a	n/a	n/a	113167	94299.9	14782.2	21115.7	10876.4	11277.6	67940	70821.9	13725.8	13163.9	6567.3	9009.06	n/a	1.30622	2.02028	1.66325	0.504919	n/a	0.961086	0.966632	0.963859	0.00392177	n/a	2.23921	1.85873	2.04897	0.269044	n/a
Q99714	3-hydroxyacyl-CoA dehydrogenase type-2	HSD17B10	HCD2_HUMAN	VcNFLASQVPFPSR	C2(TMT6-)	SNO, SOH	214	S-glutathionylation	214	n/a	-0.627605	-0.0949691	n/a	0.591501	-0.132655	n/a	n/a	n/a	n/a	n/a	n/a	63330.2	52697.7	39024.7	31406.9	5189.13	6646.47	64706.7	65881.1	29587.5	25400.6	7069.34	7268.17	n/a	6.16211	4.57256	5.36733	1.12398	n/a	0.819377	1.09252	0.955949	0.193141	n/a	5.95983	3.85553	4.90768	1.48796	n/a
Q9NRX1	RNA-binding protein PNO1	PNO1	PNO1_HUMAN	TAIcNLILGNPPSK	C4(TMT6-)	SNO, SOH	226	n/a	n/a	-0.575384	-0.125335	n/a	-0.45742	-0.973596	n/a	19621	19181.1	5633.64	5964.42	1525.96	1096.39	47836.6	46599	10046.7	13407.4	5415.14	2744.1	n/a	n/a	n/a	n/a	n/a	n/a	2.87124	2.10022	n/a	2.48573	0.545192	0.777722	1.13201	n/a	0.954865	0.250518	3.10953	2.87718	n/a	2.99335	0.164293	0.571602
P09622	Dihydrolipoyl dehydrogenase, mitochondrial	DLD	DLDH_HUMAN	VcHAHPTLSEAFR	C2(TMT6-)	SNO, SOH	484	n/a	n/a	0.159888	0.0131763	0.0278941	0	-0.296915	0.319212	14663.4	12144	1909.07	2850.45	1928.93	0	78106.4	63204.1	14774.4	18028.8	10399.4	6997.52	50773.4	58989.8	14397.7	15358.3	7779.88	12484.6	1.30193	1.89157	2.83567	2.00972	0.77367	1.31547	1.33144	1.53227	1.39306	0.120823	2.3472	2.85247	2.60355	2.60108	0.252643	0
Q15274	Nicotinate-nucleotide pyrophosphorylase [carboxylating]	QPRT	NADC_HUMAN	EDcPGLNYAALVSGAGPSQAALWAK	C3(TMT6-)	SNO, SOH	27	n/a	96	n/a	-0.357599	0.176548	n/a	0.134424	-0.0271324	n/a	n/a	n/a	n/a	n/a	n/a	12973	14657.1	4482.98	5906.87	1359.74	1722.59	28292.9	26252.9	8465.79	7995.13	2433.83	2453.52	n/a	3.45561	2.99219	3.2239	0.327687	n/a	1.04813	0.860226	0.954176	0.132866	n/a	4.03004	3.04543	3.53774	0.696223	n/a
P04075	Fructose-bisphosphate aldolase A	ALDOA	ALDOA_HUMAN	ALANSLAcQGK	C8(TMT6-)	SNO, SOH	339	S-glutathionylation	73; 240; 339	-0.733585	-0.519396	-0.760347	-0.302356	0.52364	0.0760844	19399.1	18382.9	1915.07	1761.24	1482.46	1149.64	72928.3	65396.3	18679.3	17462.1	8445.72	11122	68876.8	85294.7	17625.1	11604	6433.04	9296.88	0.987194	2.56133	2.55893	2.03582	0.908136	0.764188	1.15809	0.933992	0.952089	0.197571	0.958087	2.6702	1.36045	1.66292	0.895236	0.625386
P62760	Visinin-like protein 1	VSNL1	VISL1_HUMAN	SDPSIVLLLQcDIQK	C11(TMT6-)	SNO, SOH	187	n/a	n/a	n/a	1.04522	0.220841	n/a	0.633202	0.0545269	n/a	n/a	n/a	n/a	n/a	n/a	23960.8	15579	2688.14	5389.73	3215.27	3312.27	31500.9	30466.2	7839.79	7957.82	1757.9	1954.67	n/a	1.12189	2.48876	1.80532	0.966518	n/a	1.34189	0.55805	0.949971	0.554259	n/a	3.45961	2.61201	3.03581	0.599345	n/a
P62888	60S ribosomal protein L30	RPL30	RL30_HUMAN	TGVHHYSGNNIELGTAcGK	C17(TMT6-)	SNO, SOH	85	n/a	52; 92	2.32569	-0.888214	0.434255	-0.129227	-0.329182	-0.242376	29352	23148.7	823.85	5256.21	2006.26	1459.96	52521.7	49050.1	11721.2	8837.43	9895.1	7514.22	99869.5	89742.6	5992.81	6552.9	2793.51	2349.21	0.28068	2.23168	0.600065	1.03748	1.04647	0.683517	1.884	0.279716	0.949079	0.834462	2.27063	1.80171	0.730188	1.60085	0.789623	0.630688
Q9Y512	Sorting and assembly machinery component 50 homolog	SAMM50	SAM50_HUMAN	TKDDIIIcEIGDVFK	C8(TMT6-)	SNO, SOH	65	n/a	n/a	n/a	0.39126	0.179099	n/a	-1.16677	-0.0318157	n/a	n/a	n/a	n/a	n/a	n/a	54003.7	44063.1	8886.79	14210.5	7800.69	2896.06	53657.2	48454.3	10593.4	9753.6	2353.29	2301.28	n/a	1.64559	1.97426	1.80993	0.232408	n/a	1.44447	0.438578	0.941526	0.711275	n/a	3.22504	2.01295	2.61899	0.857076	n/a
P07858	Cathepsin B	CTSB	CATB_HUMAN	IcEPGYSPTYK	C2(TMT6-)	SNO, SOH	211	108, sulfinic acid	n/a	-0.110839	0.110413	-0.277397	-0.0654999	0.0311219	-0.590176	45364.8	58370.2	7879.11	15150.2	2239.86	2779.35	80662.4	76210.8	8272.78	12608.6	6507.47	6417.75	60559.7	74501.1	15175.1	13871.4	9127.46	8257.27	1.73683	1.02561	2.50581	1.75608	0.740289	0.493745	0.806755	1.50718	0.935894	0.518915	2.59553	1.65444	1.8619	2.03729	0.494454	0.476158
P62280	40S ribosomal protein S11	RPS11	RS11_HUMAN	NMSVHLSPcFR	C9(TMT6-)	SNO, SOH	109	n/a	79; 131	n/a	-0.248913	0.0815539	n/a	-0.253662	-0.151436	n/a	n/a	n/a	n/a	n/a	n/a	126891	104065	20238.6	20871.8	14029.1	9858.32	158956	199060	19006.5	22681.6	12006	14986	n/a	1.59497	1.19571	1.39534	0.282318	n/a	1.10561	0.755301	0.930455	0.247705	n/a	2.00564	1.13943	1.57254	0.612504	n/a
Q00839	Isoform Short of Heterogeneous nuclear ribonucleoprotein U	HNRNPU -	HNRPU_HUMAN	McLFAGFQR	C2(TMT6-)	SNO, SOH	593	n/a	562	n/a	0.16977	0.237335	n/a	0.730132	0.0896325	n/a	n/a	n/a	n/a	n/a	n/a	59044	47140.9	14062.1	18871.7	6059.63	8198.15	73895.7	87072.6	10399.6	13008.8	6155.27	8543.97	n/a	2.38163	1.40734	1.89448	0.688933	n/a	1.02629	0.832968	0.929629	0.1367	n/a	4.00326	1.49402	2.74864	1.7743	n/a
P50991	T-complex protein 1 subunit delta	CCT4	TCPD_HUMAN	TLSGMESYcVR	C9(TMT6-)	SNO, SOH	446	n/a	295; 379; 410	0.61043	n/a	-0.00495877	-0.351055	n/a	0.17878	195224	149748	11405.2	21553.7	14886.7	9034.75	n/a	n/a	n/a	n/a	n/a	n/a	214875	209178	33784.3	29516.5	23510	28679.2	0.584211	n/a	1.57228	1.07824	0.698668	0.762547	n/a	1.09412	0.928335	0.234459	1.43933	n/a	1.41107	1.4252	0.0199826	0.60333
P49327	Fatty acid synthase	FASN	FAS_HUMAN	LGMLSPEGTcK	C10(TMT6-)	SNO, SOH	205	n/a	634; 642; 1118; 1127; 1471	-0.174652	0.108181	-0.325099	-0.053318	0.40934	0.64777	84612.9	80739.4	24897.4	33967.3	10133.9	9404.62	155137	139297	21707.6	31393.2	11122.1	13548.6	50480.3	62408.7	22732.4	20203	4356.1	9340.88	2.94251	1.39925	4.50321	2.94832	1.55199	1.19768	0.716922	0.862931	0.925843	0.246475	4.20703	2.25369	3.23721	3.23264	0.976676	1.16481
Q7L2H7	Eukaryotic translation initiation factor 3 subunit M	EIF3M	EIF3M_HUMAN	LLYEALVDcK	C9(TMT6-)	SNO, SOH	175	n/a	n/a	0.0815281	0.0256485	0.106407	1.25491	-0.974019	-0.047856	61132.3	49811.3	12970.5	18046.3	2861.72	5615.85	57210.2	51654.4	12275.1	16858.3	6727.1	3158.7	49322.9	58152.2	10886.8	12444.1	5584.09	7050.7	2.12171	2.14562	2.20725	2.15819	0.0441347	0.46812	1.17586	1.13215	0.925376	0.396598	3.62294	3.26367	2.13991	3.00884	0.773657	1.12743
P00367	Glutamate dehydrogenase 1, mitochondrial	GLUD1	DHE3_HUMAN	IIKPcNHVLSLSFPIR	C5(TMT6-)	SNO, SOH	112	S-nitrosylation	n/a	n/a	-0.0458738	-0.235156	n/a	0.181668	-0.267864	n/a	n/a	n/a	n/a	n/a	n/a	60464.8	51434.1	9946.22	12247	6338.12	6246.73	78654.3	87671.2	11639.9	9926.76	6104.6	6256.41	n/a	1.64496	1.47988	1.56242	0.11673	n/a	1.04823	0.776131	0.912182	0.192405	n/a	2.3811	1.13227	1.75669	0.883058	n/a
Q14683	Structural maintenance of chromosomes protein 1A	SMC1A	SMC1A_HUMAN	HNLLQAcK	C7(TMT6-)	SNO, SOH	933	n/a	n/a	0	n/a	-0.164692	0	n/a	-0.197012	10513.7	7106.8	1961.29	0	1442.53	0	n/a	n/a	n/a	n/a	n/a	n/a	63839.8	76077.7	25796	24697.6	11582.7	13330.2	1.86547	n/a	4.04074	2.95311	1.53815	1.37205	n/a	1.81433	1.59319	0.312737	0	n/a	3.24636	1.62318	2.29552	0
P62306	Small nuclear ribonucleoprotein F	SNRPF	RUXF_HUMAN	cNNVLYIR	C1(TMT6-)	SNO, SOH	66	n/a	n/a	1.0535	-0.215922	-0.384265	0	0.13665	0.28137	9103.23	8256.75	685.22	2081.67	0	0	98217.9	82295.1	27501.9	29647	14412.4	13561.6	126466	136948	34714	25937.1	15838.1	23075.5	0.752721	2.8001	2.74492	2.09925	1.16645	0	1.46739	1.25236	0.906584	0.792453	2.52118	3.60252	1.89395	2.67255	0.864286	0
P49773	Histidine triad nucleotide-binding protein 1	HINT1	HINT1_HUMAN	cAADLGLNK	C1(TMT6-)	SNO, SOH	84	n/a	n/a	-0.042875	-0.0787277	0.256808	-0.33184	0.287576	-0.0343444	37755.6	34846.2	5279.61	7633.12	2486.98	1840.43	114995	106261	31429.8	41093.2	18828.1	21693.3	38782.4	43494.8	4672.64	5638.76	1619.82	1963.8	1.39836	2.73315	1.20483	1.77878	0.832151	0.658706	1.6373	0.417669	0.904557	0.645915	2.19052	3.8672	1.29642	2.45138	1.30509	0.528158
Q06210	Isoform 2 of Glutamine--fructose-6-phosphate aminotransferase [isomerizing] 1	GFPT1	GFPT1_HUMAN	DWEANAcK	C7(TMT6-)	SNO, SOH	55	n/a	n/a	-0.335104	-0.529154	-0.273923	-0.0252181	0.45013	1.36573	26110.9	18413.3	6687.54	6033.01	2016.9	1410.49	30636	31262.9	7990.26	8443.05	4566.9	6503.96	28080.5	26347.6	10041	7017.24	1238.43	3315.11	2.56121	2.60813	3.57579	2.91504	0.572706	0.772437	1.4907	0.441028	0.901388	0.536586	3.27643	2.70066	2.66334	2.88014	0.343703	0.766016
P55072	Transitional endoplasmic reticulum ATPase	VCP	TERA_HUMAN	QAAPcVLFFDELDSIAK	C5(TMT6-)	SNO, SOH	572	n/a	105; 535; 572	n/a	0.0942346	-0.362593	n/a	-0.942672	-1.5909	n/a	n/a	n/a	n/a	n/a	n/a	44147.7	40474.7	6847.72	10014.3	5355.99	2609.75	58708.2	72139.2	9025.85	7768.23	3449.11	1557.54	n/a	1.55109	1.53741	1.54425	0.00967774	n/a	1.2132	0.5875	0.90035	0.442436	n/a	2.47422	1.07684	1.77553	0.988096	n/a
Q9BS26	Endoplasmic reticulum resident protein 44	ERP44	ERP44_HUMAN	TPADcPVIAIDSFR	C5(TMT6-)	SNO, SOH	318	n/a	n/a	-0.254805	-0.22115	0.189445	-0.0942779	-0.132145	0.209261	130727	124670	13615.6	17561.6	9092.79	8197.49	124778	113693	13177.2	15391.5	12800.1	10871.4	92997	90963.3	14811.6	14877.9	8950.85	11205.3	1.04153	1.05606	1.5927	1.2301	0.314109	0.695557	1.02583	0.962488	0.894626	0.175284	1.40865	1.35377	1.6356	1.46601	0.14941	0.657535
Q9H2U2	Inorganic pyrophosphatase 2, mitochondrial	PPA2	IPYR2_HUMAN	STNcFGDNDPIDVcEIGSK	C4(TMT6-); C14(TMT6-)	SNO, SOH	161; 171	n/a	180	0.860985	0.873935	n/a	-0.0137481	0.162037	n/a	20449.1	19908.3	2686.2	7665.04	2398.01	2333.66	27291.3	27344.6	2365.23	6489.84	1632.26	1869.27	n/a	n/a	n/a	n/a	n/a	n/a	1.3136	0.866663	n/a	1.09013	0.316035	1.17267	0.59809	n/a	0.885381	0.406291	3.85017	2.37336	n/a	3.11176	1.04426	1.17221
P00505	Aspartate aminotransferase, mitochondrial	GOT2	AATM_HUMAN	VGAFTMVcK	C8(TMT6-)	SNO, SOH	293	n/a	187	0.118206	-0.120076	0.194784	-0.214492	-0.130747	0.0244822	92666.8	83394.4	12278.2	19353.7	9157.68	7167.97	111071	92701.8	15376	17644.9	9339.77	7273.15	64849.1	77695.8	9904.24	12231.1	5310.63	7164.37	1.32498	1.38435	1.52728	1.4122	0.103984	0.988238	0.840886	0.818922	0.882682	0.0920715	2.32074	1.9034	1.57422	1.93279	0.374126	0.859527
P04406	Glyceraldehyde-3-phosphate dehydrogenase	GAPDH	G3P_HUMAN	IISNAScTTNcLAPLAK	C7(TMT6-); C11(Carbamidomethyl)	SNO	152	152, sulfenic acid & S-nitrosylation; 156, S-nitrosylation	152; 247	-1.06401	-0.320657	0	0	0.176284	0	2264.42	2445.81	1398.93	1166.27	0	0	5277.5	5593.26	1894.16	2401.92	1396.74	1708.74	5216.32	6525.78	0	1575.87	0	1970.21	6.17788	3.58913	0	3.25567	3.10241	0	2.6466	0	0.8822	1.52802	4.76843	4.29431	2.41483	3.82586	1.24476	0
P49368	T-complex protein 1 subunit gamma	CCT3	TCPG_HUMAN	IPGGIIEDScVLR	C10(TMT6-)	SNO, SOH	213	n/a	173; 213	-0.450182	0.540325	-0.269403	-0.150296	0.711726	0.0954391	29793.2	24839.6	9304.11	9162.55	1554.1	1178.23	31575.2	22491.1	5582.93	8641.98	2213.84	2638.26	46581.7	41010.6	16308	10727.5	6612.31	6885.44	3.12289	1.76814	3.50096	2.79733	0.911132	0.521629	0.701133	1.41951	0.880757	0.475127	3.68869	3.8424	2.61578	3.38229	0.66825	0.474335
P16615	Sarcoplasmic/endoplasmic reticulum calcium ATPase 2	ATP2A2	AT2A2_HUMAN	TGTLTTNQMSVcR	C12(TMT6-)	SNO, SOH	361	674, S-glutathionylation	560	0.3956	0.455705	0.00306102	0.262443	-1.05407	0.092596	82196.2	71798.3	8504.13	15769.3	6072.18	6420.62	72913.6	60711.4	7755.57	13233.9	8107.36	3321.17	64479.7	68898.8	11518.4	11107.5	5088.06	6417.76	1.03461	1.06367	1.78637	1.29488	0.425887	0.738743	1.11191	0.789095	0.879917	0.202486	2.19634	2.17981	1.61215	1.9961	0.332612	0.894257
P12004	Proliferating cell nuclear antigen	PCNA	PCNA_HUMAN	cAGNEDIITLR	C1(TMT6-)	SNO, SOH	81	n/a	81; 162	0.10664	-0.0972098	0.146668	0	-0.598944	0.0157514	80682.7	77459.5	4733.34	7895.82	2626.33	0	93365.8	97398	16215.1	23629.3	11618.7	8174.78	104568	117257	25798.1	28839.9	14477.5	18169.6	0.586661	1.73672	2.46713	1.59684	0.948005	0.325514	1.24443	1.38451	0.984819	0.575255	1.01935	2.42605	2.45955	1.96832	0.822002	0
O95747	Serine/threonine-protein kinase OSR1	OXSR1	OXSR1_HUMAN	TFVGTPcWMAPEVMEQVR	C7(TMT6-)	SNO, SOH	191	n/a	n/a	n/a	-0.719324	-0.805424	n/a	-0.423227	-1.16356	n/a	n/a	n/a	n/a	n/a	n/a	29668.2	32728.2	7992.29	8001.96	2865.43	2408.09	31673.2	39747.8	11990.1	7753.58	2466.75	1529.85	n/a	2.69389	3.78558	3.23974	0.771943	n/a	0.965826	0.778813	0.872319	0.132238	n/a	2.44497	1.95069	2.19783	0.349509	n/a
O94979	Protein transport protein Sec31A	SEC31A	SC31A_HUMAN	TQPPEDIScIAWNR	C9(TMT6-)	SNO, SOH	173	n/a	60	-0.2851	-0.266339	-0.092041	-0.939836	-0.225906	-0.332454	127598	107082	15474.3	17198.6	12753.5	5630.56	103101	101092	17526.7	21350.7	8848.37	7578.28	108622	136322	18866.8	20005.6	8220.46	9070.55	1.21274	1.69995	1.73692	1.54987	0.29255	0.999509	0.858224	0.756793	0.871509	0.121902	1.60611	2.112	1.46752	1.72854	0.339232	0.525816
Q8TAT6	Nuclear protein localization protein 4 homolog	NPLOC4	NPL4_HUMAN	FVALENIScK	C9(TMT6-)	SNO, SOH	188	n/a	188	0.0246544	0.021079	n/a	0.0941691	-1.1599	n/a	98001.8	91408.6	14104.6	21595.8	6023.92	6052.66	64720.5	53547.6	15097.1	18939.5	7283.2	2754.94	n/a	n/a	n/a	n/a	n/a	n/a	1.43922	2.33266	n/a	1.88594	0.631753	0.614674	1.12533	n/a	0.870003	0.361089	2.36256	3.53695	n/a	2.94975	0.830417	0.662154
P21291	Cysteine and glycine-rich protein 1	CSRP1	CSRP1_HUMAN	TVYFAEEVQcEGNSFHK	C10(TMT6-)	SNO, SOH	25	n/a	n/a	-1.00579	-0.622868	-0.272057	-2.42785	0	0.687909	33061.9	39183	7752.83	7384.01	7734.96	1719.25	42035.6	38118.9	6264.02	5511.96	0	1100.59	46440.9	52494.2	9543.85	8045.46	1206.82	2432.78	2.34494	1.49017	2.05506	1.96339	0.434697	2.33954	0	0.259861	0.866466	1.28232	1.88449	1.44599	1.53264	1.62104	0.232231	0.438773
P05091	Aldehyde dehydrogenase, mitochondrial	ALDH2	ALDH2_HUMAN	LLcGGGIAADR	C3(TMT6-)	SNO, SOH	386	318, intramolecular disulfide; 320, intramolecular disulfide	n/a	-0.321765	-0.124259	0.169398	-0.773846	0.148622	-0.151149	70247.9	69256.1	4676.96	5953.34	5664.98	3296.39	172077	168002	25559.7	34211.6	15591.5	17237.5	110541	139136	15010.7	19134.9	9710.71	12185.3	0.665779	1.48536	1.35794	1.16969	0.441028	0.806427	0.906075	0.878474	0.863659	0.0514496	0.859612	2.03638	1.37527	1.42375	0.589879	0.475971
O00567	Nucleolar protein 56	NOP56	NOP56_HUMAN	LVAFcPFASSQVALENANAVSEGVVHEDLR	C5(TMT6-)	SNO, SOH	52	n/a	n/a	n/a	0.196317	-1.11211	n/a	-0.0432943	-1.66056	n/a	n/a	n/a	n/a	n/a	n/a	29770	24892.6	6552.72	9380.88	2450.9	2031.61	29322.3	38400.2	9806.87	5350.58	2640.39	1210.86	n/a	2.20112	3.34451	2.77282	0.808503	n/a	0.82328	0.900472	0.861876	0.0545834	n/a	3.76854	1.39337	2.58096	1.6795	n/a
P32969	60S ribosomal protein L9	RPL9	RL9_HUMAN	TIcSHVQNmIK	C3(TMT6-); M9(Oxidation)	SNO	74	n/a	n/a	0.174525	n/a	-0.466176	0	n/a	-1.84429	2331.13	2226.38	208.077	361.932	0	0	n/a	n/a	n/a	n/a	n/a	n/a	36413.8	40488.1	9287.22	6731.74	6272.04	2150.07	0.892601	n/a	2.55047	1.72153	1.17229	0	n/a	1.72243	0.861217	1.21794	1.62565	n/a	1.66265	1.64415	0.0261577	0
O95757	Heat shock 70 kDa protein 4L	HSPA4L	HS74L_HUMAN	SIDLPIQSSLcR	C11(TMT6-)	SNO, SOH	589	n/a	n/a	n/a	-0.322832	-0.45333	n/a	-1.20198	-0.854019	n/a	n/a	n/a	n/a	n/a	n/a	49369.3	52539.4	12720.6	16172.7	5415.29	2559.01	50399.5	67742.4	12106	10702.4	3103.27	2554.68	n/a	2.57661	2.40201	2.48931	0.123464	n/a	1.09689	0.615733	0.856314	0.340232	n/a	3.07822	1.57987	2.32904	1.05949	n/a
Q12905	Interleukin enhancer-binding factor 2	ILF2	ILF2_HUMAN	cLQILAAGLFLPGSVGITDPcESGNFR	C1(TMT6-); C21(TMT6-)	SNO, SOH	271; 291	n/a	n/a	n/a	-0.552219	2.17374	n/a	-0.851829	-0.179999	n/a	n/a	n/a	n/a	n/a	n/a	14746.3	13450.8	2627.27	2442.12	2054.28	1060.6	34432.5	39045.4	699.791	3224.35	1090	1207.84	n/a	1.78164	0.203235	0.992439	1.1161	n/a	1.39308	0.31656	0.854819	0.761214	n/a	1.81559	0.825796	1.32069	0.699891	n/a
Q9Y5Y2	Cytosolic Fe-S cluster assembly factor NUBP2	NUBP2	NUBP2_HUMAN	VGILDVDLcGPSIPR	C9(TMT6-)	SNO, SOH	54	n/a	n/a	n/a	-0.271906	-0.432701	n/a	0.212291	-0.628947	n/a	n/a	n/a	n/a	n/a	n/a	58431.1	49304.9	16518.3	17250.1	5688.17	5680.41	28438.3	27902.8	14785.5	9679.15	2083.77	1463.62	n/a	2.82697	5.19915	4.01306	1.67739	n/a	0.973483	0.732733	0.853108	0.170236	n/a	3.49865	3.46888	3.48377	0.0210528	n/a
P23381	Tryptophan--tRNA ligase, cytoplasmic	WARS	SYWC_HUMAN	GIFGFTDSDcIGK	C10(TMT6-)	SNO, SOH	274	n/a	n/a	n/a	0.77112	0.264564	n/a	0.403487	-0.261808	n/a	n/a	n/a	n/a	n/a	n/a	44185.1	30105.8	6823.46	11856.1	2737.51	2520.27	27472.8	26899.3	9083.09	9621.14	2971.28	2686.2	n/a	1.54429	3.30621	2.42525	1.24586	n/a	0.619554	1.08154	0.850545	0.32667	n/a	3.93814	3.57672	3.75743	0.255564	n/a
P62195	Isoform 2 of 26S protease regulatory subunit 8	PSMC5	PRS8_HUMAN	NIDINDVTPNcR	C11(TMT6-)	SNO, SOH	112	n/a	n/a	-0.0209528	-0.190822	-0.169628	-0.107521	0.041116	1.35811	67010.1	57169.6	15801.3	21441	6765.12	5406.3	76672.7	62142	14574.8	15464.5	8488.73	7231.36	61507.7	72401.5	16036.8	15114.2	2572.29	8592.85	2.35806	1.90091	2.60728	2.28875	0.35825	1.00957	1.10714	0.418206	0.844971	0.372795	3.75042	2.48857	2.08755	2.77552	0.867774	0.94566
Q9NR45	Sialic acid synthase	NANS	SIAS_HUMAN	PLELELcPGR	C7(TMT6-)	SNO, SOH	8	S-nitrosylation	n/a	0.522962	n/a	0.105784	-1.0051	n/a	-1.45995	75873	65115.6	7383.62	14693.6	5835.8	2518.25	n/a	n/a	n/a	n/a	n/a	n/a	64920	87552.4	7710.78	10077.3	5925.2	3215.68	0.973154	n/a	1.18774	1.08045	0.151733	0.769153	n/a	0.912693	0.840923	0.101498	2.25654	n/a	1.15101	1.70377	0.781727	0.386736
P36578	60S ribosomal protein L4	RPL4	RL4_HUMAN	RGPcIIYNEDNGIIK	C4(TMT6-)	SNO, SOH	208	n/a	96; 208; 250	-0.459692	0.541354	-0.0653981	0.60751	-0.353795	-0.362476	52070.7	43506.7	13183.5	12925.5	1819.97	2338.15	76242.6	55680.2	12016.5	19084.3	5749.4	3356.44	68960.6	78528.5	17943	17585.2	9654.32	9466.72	2.53186	1.57608	2.60192	2.23662	0.573113	0.349519	0.754093	1.39998	0.834529	0.529828	2.97092	3.42748	2.23934	2.87925	0.599352	0.537422
P05026	Isoform 2 of Sodium/potassium-transporting ATPase subunit beta-1	ATP1B1	AT1B1_HUMAN	YNPNVLPVQcTGK	C10(TMT6-)	SNO, SOH	213	n/a	n/a	-0.314213	-0.356322	-0.0817118	0	-0.397449	-0.364363	8686.5	9880.26	1619.28	2390.52	0	0	61800.1	53160.4	11613.6	11661	8251.62	5504.91	64813.2	68730.8	14593.1	13169	7516.65	6854.82	1.86414	1.87922	2.25157	1.99831	0.219456	0	1.33521	1.15974	0.83165	0.725555	2.41949	2.19355	1.91602	2.17635	0.252174	0
P34897	Isoform 3 of Serine hydroxymethyltransferase, mitochondrial	SHMT2	GLYM_HUMAN	GLELIASENFcSR	C11(TMT6-)	SNO, SOH	80	n/a	n/a	-0.0389263	-0.36828	0.771747	-0.405988	0.0657449	0.49771	114272	92909.6	14543.4	18573.8	12477.2	7726.58	64965.7	52915.3	6699.26	6316.73	6049.51	5268.22	33557	37496.9	5077.89	8724.23	1550.61	2708.36	1.2727	1.0312	1.51321	1.27237	0.241007	1.09188	0.931185	0.462081	0.828382	0.327243	1.99913	1.19374	2.32666	1.83984	0.583009	0.831623
P22087	rRNA 2'-O-methyltransferase fibrillarin	FBL	FBRL_HUMAN	ANcIDSTASAEAVFASEVK	C3(TMT6-)	SNO, SOH	268	n/a	99	n/a	-0.435285	0.834874	n/a	-1.78414	0.299502	n/a	n/a	n/a	n/a	n/a	n/a	46324.3	42400.1	9222.47	9328.32	5972.04	1621.27	51052.9	52351.9	5812.86	9574.96	1860.93	2599.98	n/a	1.99085	1.1386	1.56472	0.602633	n/a	1.28918	0.364511	0.826846	0.65384	n/a	2.20007	1.82896	2.01452	0.262413	n/a
Q9Y617	Phosphoserine aminotransferase	PSAT1	SERC_HUMAN	EcPSVLEYK	C2(TMT6-)	SNO, SOH	224	n/a	n/a	-0.418036	n/a	-0.232786	-0.501426	n/a	-0.0335708	74945.6	64923.1	24856.4	26006.6	9157.88	5655.49	n/a	n/a	n/a	n/a	n/a	n/a	38794.9	41635.8	10500.8	8636.76	1636.4	1899.52	3.3166	n/a	2.70674	3.01167	0.431234	1.22194	n/a	0.421809	0.821873	0.565776	4.00575	n/a	2.07436	3.04006	1.3657	0.871106
P22695	Cytochrome b-c1 complex subunit 2, mitochondrial	UQCRC2	QCR2_HUMAN	NALANPLYcPDYR	C9(TMT6-)	SNO, SOH	192	n/a	n/a	1.26956	0.449269	-0.106686	0.355323	-0.0340278	0.254624	30672.7	23506.7	1683.25	5018.78	1982.84	1961.8	175180	138055	14586.7	23453.2	20176.1	15864.2	151742	166624	21627.6	19862.6	10098.2	14645	0.548777	0.832669	1.42528	0.935577	0.447223	0.646449	1.15173	0.66548	0.821221	0.28639	2.13504	1.69882	1.19206	1.67531	0.47193	0.834572
P22314	Ubiquitin-like modifier-activating enzyme 1	UBA1	UBA1_HUMAN	YFLVGAGAIGcELLK	C11(TMT6-)	SNO, SOH	481	n/a	234;632	n/a	-0.556693	-0.257555	n/a	-0.374496	-0.485348	n/a	n/a	n/a	n/a	n/a	n/a	68593.4	70392.2	10698.4	11153.5	6687.35	5407.76	34366	41945.3	8181.97	7523.05	2291.49	2211.75	n/a	1.55968	2.38084	1.97026	0.580643	n/a	0.974927	0.666791	0.820859	0.217885	n/a	1.58448	1.79354	1.68901	0.147826	n/a
P23434	Glycine cleavage system H protein, mitochondrial	GCSH	GCSH_HUMAN	ScYEDGWLIK	C2(TMT6-)	SNO, SOH	138	n/a	n/a	-0.54164	-0.509378	0.370561	-0.122875	-1.13833	-0.0824553	81600.6	76077.7	16977.2	17547.5	6054.61	5231.52	71201.9	68615.1	13346.2	13501.4	7570.06	3385.42	113442	116826	11373.5	13637.1	7228.95	7783.72	2.08053	1.87442	1.00259	1.65251	0.572208	0.741981	1.06318	0.637239	0.814134	0.22195	2.30652	1.96771	1.16731	1.81384	0.584985	0.687654
P02787	Serotransferrin	TF	TRFE_HUMAN	KPVEEYANcHLAR	C9(TMT6-)	SNO	596	S-nitrosylation	n/a	-0.348604	-0.753368	n/a	0	0.484605	n/a	15049.7	13207.8	1945.83	2164.22	0	873.297	51513.6	51772.6	11102.8	9891.37	8373.59	12028.9	n/a	n/a	n/a	n/a	n/a	n/a	1.29294	2.15531	n/a	1.72412	0.60979	0	1.62551	n/a	0.812755	1.14941	1.63859	1.91054	n/a	1.77457	0.192296	0.661197
Q6IBS0	Twinfilin-2	TWF2	TWF2_HUMAN	HLSScAAPAPLTSAER	C5(TMT6-)	SNO, SOH	141	n/a	n/a	-0.244163	n/a	0.0757206	-0.521795	n/a	0.00336683	22770.5	20807.6	4673.91	5819.18	2496.71	1603.64	n/a	n/a	n/a	n/a	n/a	n/a	30242.2	28149.2	2344.76	2071.38	1598.56	1651.07	2.05261	n/a	0.775327	1.41397	0.903177	1.09646	n/a	0.528587	0.812525	0.40155	2.79666	n/a	0.735855	1.76626	1.45721	0.770699
O00299	Chloride intracellular channel protein 1	CLIC1	CLIC1_HUMAN	LHIVQVVcK	C8(TMT6-)	SNO, SOH	191	24, intramolecular disulfide & S-glutathionylation. 59, intramolecular disulfide	191	-0.00224653	0.48578	0.103525	-0.400796	0.514118	0.155355	86093.3	78639.4	16867	24823.7	10768.9	7518.93	264697	213571	15493.8	26158.7	13943.7	16413.2	199647	215529	30029.7	31366.9	13168.7	17527.5	1.95916	0.585339	1.50414	1.34955	0.699835	1.25084	0.526781	0.659599	0.812406	0.385458	3.15665	1.22483	1.45535	1.94561	1.05511	0.956128
P23381	Tryptophan--tRNA ligase, cytoplasmic	WARS	SYWC_HUMAN	DIIAcGFDINK	C5(TMT6-)	SNO, SOH	225	n/a	n/a	n/a	0.575971	-0.232204	n/a	-0.444579	1.06343	n/a	n/a	n/a	n/a	n/a	n/a	54343.3	36475.3	10786.5	16126.9	6056.57	3051.43	58634.6	52265	19778.4	13516.4	2885.09	5949.88	n/a	1.98488	3.37315	2.67902	0.981656	n/a	1.1145	0.492045	0.803273	0.440143	n/a	4.42132	2.58612	3.50372	1.29768	n/a
P02771	Alpha-fetoprotein	AFP	FETA_HUMAN	RPcFSSLVVDETYVPPAFSDDK	C3(TMT6-)	SNO, SOH	511	n/a	n/a	n/a	-0.0687757	0.097618	n/a	0.279106	-0.47452	n/a	n/a	n/a	n/a	n/a	n/a	48919.3	41603.4	6178.58	7486.27	2924.06	3082.55	24377.7	21418.4	6459.96	5469.19	2459.25	1721.55	n/a	1.26301	2.64994	1.95648	0.980707	n/a	0.597732	1.00881	0.803271	0.290675	n/a	1.79944	2.5535	2.17647	0.533201	n/a
Q9NR30	Nucleolar RNA helicase 2	DDX21	DDX21_HUMAN	LGVcFDVPTASVTEIQEK	C4(TMT6-)	SNO, SOH	682	n/a	n/a	0.0456504	-0.460462	0.380999	0	-1.33086	-1.35581	29104.2	24703.2	6861.29	9700.15	2702.94	0	39971.8	34047.7	7150.04	6613.97	5934.97	2052.97	65918	66528.8	9153.32	10834	6002.43	2620.36	2.35749	1.78877	1.38859	1.84495	0.486886	0.928709	1.48479	0.91059	1.10803	0.326411	3.92668	1.94256	1.62847	2.49924	1.24614	0
P39023	60S ribosomal protein L3	RPL3	RL3_HUMAN	TVFAEHISDEcK	C11(TMT6-)	SNO, SOH	114	n/a	118	0.453426	0.191434	0	-0.0246393	-0.171775	-1.03228	132033	112113	9060.28	16999.7	13210.6	11128.6	256924	194321	11607.9	14980.6	21950.9	15056.2	47669.9	55164.2	0	2109.61	2540.03	1591.01	0.686212	0.451803	0	0.379338	0.348798	1.00055	0.854374	0.532837	0.79592	0.239272	1.51631	0.770919	0.382423	0.889882	0.576227	0.99263
O75874	Isocitrate dehydrogenase [NADP] cytoplasmic	IDH1	IDHC_HUMAN	SEGGFIWAcK	C9(TMT6-)	SNO, SOH	269	n/a	n/a	0.236486	-0.500009	0.446264	-0.470238	-0.491471	-0.591168	170947	172134	15675.8	30009.5	8456.32	6202.94	126023	112715	14183.7	13404.1	14104.1	9166.14	186921	243933	11419.5	18285.6	14291	13705.1	0.917	1.12549	0.610925	0.884472	0.25882	0.494675	1.11918	0.764548	0.7928	0.313207	1.74338	1.1892	0.749618	1.2274	0.497981	0.360355
Q92616	Translational activator GCN1	GCN1L1	GCN1L_HUMAN	SWcQEELSVAVK	C3(TMT6-)	SNO, SOH	939	n/a	1535	-0.251471	-0.516585	-0.973346	0.343174	-0.874987	0	77181.7	66290.9	15298.3	17812.2	5526.12	6076.19	126172	119488	24668.1	24401.9	20968.2	11060.7	28914.4	31674.5	6159.34	3094.83	0	1379.54	1.98212	1.95512	2.1302	2.02248	0.09426	0.715988	1.66188	0	0.792622	0.833585	2.68697	2.0422	0.977074	1.90208	0.863517	0.916595
P62333	26S protease regulatory subunit 10B	PSMC6	PRS10_HUMAN	GcLLYGPPGTGK	C2(TMT6-)	SNO, SOH	170	n/a	193	n/a	-0.298917	0.0518184	n/a	-0.414361	0.270536	n/a	n/a	n/a	n/a	n/a	n/a	108000	99536.9	18312.4	20500.1	9024.88	6375.64	104783	111076	22062.6	21832.2	7827.35	11080.3	n/a	1.69559	2.10555	1.90057	0.289885	n/a	0.835639	0.747007	0.791323	0.0626727	n/a	2.05954	1.96552	2.01253	0.0664827	n/a
P10620	Microsomal glutathione S-transferase 1	MGST1	MGST1_HUMAN	VFANPEDcVAFGK	C8(TMT6-)	SNO, SOH	50	n/a	50	1.21358	-0.162146	-0.0674299	-0.125394	-0.670787	-0.564439	22523.1	25126.8	1582.26	6606.08	1459.48	1506.35	32418.2	27367.6	4747.86	5352.63	2209.96	1197.19	91125.8	113890	18906.3	20307.9	9384.94	8780.74	0.702503	1.46457	2.07475	1.41394	0.68752	0.647993	0.681704	1.02989	0.786529	0.211429	2.6291	1.95583	1.78312	2.12268	0.446992	0.5995
[truncated: 705 more rows]
[truncated: 4 more columns]

## Sheet: D - RedoxDB+dbSNO
Protein name	Short name	Gene name	UniProt accession	Sequence	TMT mod in protein	final mod.	Redox DB, Nov.4th 2014	dbSNO 2.0, Nov.4th 2014	replicates
[truncated: 887 more rows]

## Sheet: E - Table 1_extended
Functio annotation of proteins containing cysteine sites modified by SNO and/or SOH and regulated upon APAP treatment					Modification site and protein structure properties						Quantitation of SNO and SOH changes between APAP and CTRL samples																Relative site occupancy					Quantitation of protein levels between APAP and CTRL samples
[truncated: 63 more rows]
